# Supplementary material for: Trends of Mutation Accumulation Across Global SARS-CoV-2 Genomes: Implications for the Evolution of the Novel Coronavirus
Source: Preprints.org preprint supplement (doi:10.20944/preprints202005.0463.v3), 2020-10-05
Supplement: Supplementary file 1 [file supplementary]

## Sheet: Mutations unique to reference
Reference	Position	Gene name with locus span	Mutational details
NC_045512.2	21	5' UTR (1-265)	C|T|protein_coding|upstream_gene_variant|MODIFIER|-245C>T|
NC_045512.2	25	5' UTR (1-265)	T|C|protein_coding|upstream_gene_variant|MODIFIER|-241T>C|
NC_045512.2	27	5' UTR (1-265)	A|C|protein_coding|upstream_gene_variant|MODIFIER|-239A>C|
NC_045512.2	28	5' UTR (1-265)	C|T|protein_coding|upstream_gene_variant|MODIFIER|-238C>T|
NC_045512.2	29	5' UTR (1-265)	A|C|protein_coding|upstream_gene_variant|MODIFIER|-237A>C|
NC_045512.2	30	5' UTR (1-265)	A|T|protein_coding|upstream_gene_variant|MODIFIER|-236A>T|
NC_045512.2	31	5' UTR (1-265)	A|T|protein_coding|upstream_gene_variant|MODIFIER|-235A>T|
NC_045512.2	32	5' UTR (1-265)	C|T|protein_coding|upstream_gene_variant|MODIFIER|-234C>T|
NC_045512.2	34	5' UTR (1-265)	A|T|protein_coding|upstream_gene_variant|MODIFIER|-232A>T|
NC_045512.2	35	5' UTR (1-265)	A|T|protein_coding|upstream_gene_variant|MODIFIER|-231A>T|
NC_045512.2	36	5' UTR (1-265)	C|T|protein_coding|upstream_gene_variant|MODIFIER|-230C>T|
NC_045512.2	37	5' UTR (1-265)	C|T|protein_coding|upstream_gene_variant|MODIFIER|-229C>T|
NC_045512.2	38	5' UTR (1-265)	A|T|protein_coding|upstream_gene_variant|MODIFIER|-228A>T|
NC_045512.2	40	5' UTR (1-265)	C|T|protein_coding|upstream_gene_variant|MODIFIER|-226C>T|
NC_045512.2	41	5' UTR (1-265)	T|A|protein_coding|upstream_gene_variant|MODIFIER|-225T>A|
NC_045512.2	42	5' UTR (1-265)	T|A|protein_coding|upstream_gene_variant|MODIFIER|-224T>A|
NC_045512.2	43	5' UTR (1-265)	T|C|protein_coding|upstream_gene_variant|MODIFIER|-223T>C|
NC_045512.2	44	5' UTR (1-265)	C|T|protein_coding|upstream_gene_variant|MODIFIER|-222C>T|
NC_045512.2	45	5' UTR (1-265)	G|C|protein_coding|upstream_gene_variant|MODIFIER|-221G>C|
NC_045512.2	48	5' UTR (1-265)	C|A|protein_coding|upstream_gene_variant|MODIFIER|-218C>A|
NC_045512.2	54	5' UTR (1-265)	T|A|protein_coding|upstream_gene_variant|MODIFIER|-212T>A|
NC_045512.2	55	5' UTR (1-265)	A|C|protein_coding|upstream_gene_variant|MODIFIER|-211A>C|
NC_045512.2	61	5' UTR (1-265)	G|T|protein_coding|upstream_gene_variant|MODIFIER|-205G>T|
NC_045512.2	63	5' UTR (1-265)	T|C|protein_coding|upstream_gene_variant|MODIFIER|-203T>C|
NC_045512.2	64	5' UTR (1-265)	C|T|protein_coding|upstream_gene_variant|MODIFIER|-202C>T|
NC_045512.2	66	5' UTR (1-265)	C|A|protein_coding|upstream_gene_variant|MODIFIER|-200C>A|
NC_045512.2	68	5' UTR (1-265)	A|T|protein_coding|upstream_gene_variant|MODIFIER|-198A>T|
NC_045512.2	72	5' UTR (1-265)	G|A|protein_coding|upstream_gene_variant|MODIFIER|-194G>A|
NC_045512.2	73	5' UTR (1-265)	A|T|protein_coding|upstream_gene_variant|MODIFIER|-193A>T|
NC_045512.2	74	5' UTR (1-265)	A|C|protein_coding|upstream_gene_variant|MODIFIER|-192A>C|
NC_045512.2	75	5' UTR (1-265)	C|T|protein_coding|upstream_gene_variant|MODIFIER|-191C>T|
NC_045512.2	76	5' UTR (1-265)	T|A|protein_coding|upstream_gene_variant|MODIFIER|-190T>A|
NC_045512.2	77	5' UTR (1-265)	T|C|protein_coding|upstream_gene_variant|MODIFIER|-189T>C|
NC_045512.2	78	5' UTR (1-265)	T|G|protein_coding|upstream_gene_variant|MODIFIER|-188T>G|
NC_045512.2	79	5' UTR (1-265)	A|G|protein_coding|upstream_gene_variant|MODIFIER|-187A>G|
NC_045512.2	80	5' UTR (1-265)	A|G|protein_coding|upstream_gene_variant|MODIFIER|-186A>G|
NC_045512.2	82	5' UTR (1-265)	A|T|protein_coding|upstream_gene_variant|MODIFIER|-184A>T|
NC_045512.2	83	5' UTR (1-265)	T|C|protein_coding|upstream_gene_variant|MODIFIER|-183T>C|
NC_045512.2	84	5' UTR (1-265)	C|T|protein_coding|upstream_gene_variant|MODIFIER|-182C>T|
NC_045512.2	85	5' UTR (1-265)	T|G|protein_coding|upstream_gene_variant|MODIFIER|-181T>G|
NC_045512.2	86	5' UTR (1-265)	G|A|protein_coding|upstream_gene_variant|MODIFIER|-180G>A|
NC_045512.2	87	5' UTR (1-265)	T|G|protein_coding|upstream_gene_variant|MODIFIER|-179T>G|
NC_045512.2	88	5' UTR (1-265)	G|A|protein_coding|upstream_gene_variant|MODIFIER|-178G>A|
NC_045512.2	89	5' UTR (1-265)	T|C|protein_coding|upstream_gene_variant|MODIFIER|-177T>C|
NC_045512.2	90	5' UTR (1-265)	G|T|protein_coding|upstream_gene_variant|MODIFIER|-176G>T|
NC_045512.2	91	5' UTR (1-265)	G|A|protein_coding|upstream_gene_variant|MODIFIER|-175G>A|
NC_045512.2	92	5' UTR (1-265)	C|T|protein_coding|upstream_gene_variant|MODIFIER|-174C>T|
NC_045512.2	94	5' UTR (1-265)	G|T|protein_coding|upstream_gene_variant|MODIFIER|-172G>T|
NC_045512.2	95	5' UTR (1-265)	T|A|protein_coding|upstream_gene_variant|MODIFIER|-171T>A|
NC_045512.2	96	5' UTR (1-265)	C|T|protein_coding|upstream_gene_variant|MODIFIER|-170C>T|
NC_045512.2	97	5' UTR (1-265)	A|G|protein_coding|upstream_gene_variant|MODIFIER|-169A>G|
NC_045512.2	98	5' UTR (1-265)	C|T|protein_coding|upstream_gene_variant|MODIFIER|-168C>T|
NC_045512.2	99	5' UTR (1-265)	T|C|protein_coding|upstream_gene_variant|MODIFIER|-167T>C|
NC_045512.2	100	5' UTR (1-265)	C|T|protein_coding|upstream_gene_variant|MODIFIER|-166C>T|
NC_045512.2	101	5' UTR (1-265)	G|A|protein_coding|upstream_gene_variant|MODIFIER|-165G>A|
NC_045512.2	102	5' UTR (1-265)	G|A|protein_coding|upstream_gene_variant|MODIFIER|-164G>A|
NC_045512.2	103	5' UTR (1-265)	C|T|protein_coding|upstream_gene_variant|MODIFIER|-163C>T|
NC_045512.2	104	5' UTR (1-265)	T|A|protein_coding|upstream_gene_variant|MODIFIER|-162T>A|
NC_045512.2	105	5' UTR (1-265)	G|T|protein_coding|upstream_gene_variant|MODIFIER|-161G>T|
NC_045512.2	106	5' UTR (1-265)	C|T|protein_coding|upstream_gene_variant|MODIFIER|-160C>T|
NC_045512.2	110	5' UTR (1-265)	C|T|protein_coding|upstream_gene_variant|MODIFIER|-156C>T|
NC_045512.2	111	5' UTR (1-265)	T|C|protein_coding|upstream_gene_variant|MODIFIER|-155T>C|
NC_045512.2	112	5' UTR (1-265)	T|G|protein_coding|upstream_gene_variant|MODIFIER|-154T>G|
NC_045512.2	113	5' UTR (1-265)	A|G|protein_coding|upstream_gene_variant|MODIFIER|-153A>G|
NC_045512.2	114	5' UTR (1-265)	G|A|protein_coding|upstream_gene_variant|MODIFIER|-152G>A|
NC_045512.2	115	5' UTR (1-265)	T|C|protein_coding|upstream_gene_variant|MODIFIER|-151T>C|
NC_045512.2	116	5' UTR (1-265)	G|C|protein_coding|upstream_gene_variant|MODIFIER|-150G>C|
NC_045512.2	117	5' UTR (1-265)	C|T|protein_coding|upstream_gene_variant|MODIFIER|-149C>T|
NC_045512.2	118	5' UTR (1-265)	A|G|protein_coding|upstream_gene_variant|MODIFIER|-148A>G|
NC_045512.2	119	5' UTR (1-265)	C|T|protein_coding|upstream_gene_variant|MODIFIER|-147C>T|
NC_045512.2	120	5' UTR (1-265)	T|C|protein_coding|upstream_gene_variant|MODIFIER|-146T>C|
NC_045512.2	121	5' UTR (1-265)	C|A|protein_coding|upstream_gene_variant|MODIFIER|-145C>A|
NC_045512.2	122	5' UTR (1-265)	A|G|protein_coding|upstream_gene_variant|MODIFIER|-144A>G|
NC_045512.2	123	5' UTR (1-265)	C|T|protein_coding|upstream_gene_variant|MODIFIER|-143C>T|
NC_045512.2	124	5' UTR (1-265)	G|A|protein_coding|upstream_gene_variant|MODIFIER|-142G>A|
NC_045512.2	125	5' UTR (1-265)	C|T|protein_coding|upstream_gene_variant|MODIFIER|-141C>T|
NC_045512.2	126	5' UTR (1-265)	A|T|protein_coding|upstream_gene_variant|MODIFIER|-140A>T|
NC_045512.2	127	5' UTR (1-265)	G|T|protein_coding|upstream_gene_variant|MODIFIER|-139G>T|
NC_045512.2	129	5' UTR (1-265)	A|G|protein_coding|upstream_gene_variant|MODIFIER|-137A>G|
NC_045512.2	134	5' UTR (1-265)	T|C|protein_coding|upstream_gene_variant|MODIFIER|-132T>C|
NC_045512.2	135	5' UTR (1-265)	A|G|protein_coding|upstream_gene_variant|MODIFIER|-131A>G|
NC_045512.2	136	5' UTR (1-265)	A|G|protein_coding|upstream_gene_variant|MODIFIER|-130A>G|
NC_045512.2	137	5' UTR (1-265)	T|C|protein_coding|upstream_gene_variant|MODIFIER|-129T>C|
NC_045512.2	139	5' UTR (1-265)	A|G|protein_coding|upstream_gene_variant|MODIFIER|-127A>G|
NC_045512.2	140	5' UTR (1-265)	C|T|protein_coding|upstream_gene_variant|MODIFIER|-126C>T|
NC_045512.2	141	5' UTR (1-265)	T|C|protein_coding|upstream_gene_variant|MODIFIER|-125T>C|
NC_045512.2	142	5' UTR (1-265)	A|T|protein_coding|upstream_gene_variant|MODIFIER|-124A>T|
NC_045512.2	143	5' UTR (1-265)	A|T|protein_coding|upstream_gene_variant|MODIFIER|-123A>T|
NC_045512.2	145	5' UTR (1-265)	T|C|protein_coding|upstream_gene_variant|MODIFIER|-121T>C|
NC_045512.2	146	5' UTR (1-265)	A|G|protein_coding|upstream_gene_variant|MODIFIER|-120A>G|
NC_045512.2	147	5' UTR (1-265)	C|A|protein_coding|upstream_gene_variant|MODIFIER|-119C>A|
NC_045512.2	148	5' UTR (1-265)	T|A|protein_coding|upstream_gene_variant|MODIFIER|-118T>A|
NC_045512.2	149	5' UTR (1-265)	G|T|protein_coding|upstream_gene_variant|MODIFIER|-117G>T|
NC_045512.2	150	5' UTR (1-265)	T|C|protein_coding|upstream_gene_variant|MODIFIER|-116T>C|
NC_045512.2	151	5' UTR (1-265)	C|T|protein_coding|upstream_gene_variant|MODIFIER|-115C>T|
NC_045512.2	153	5' UTR (1-265)	T|G|protein_coding|upstream_gene_variant|MODIFIER|-113T>G|
NC_045512.2	155	5' UTR (1-265)	G|T|protein_coding|upstream_gene_variant|MODIFIER|-111G>T|
NC_045512.2	156	5' UTR (1-265)	A|G|protein_coding|upstream_gene_variant|MODIFIER|-110A>G|
NC_045512.2	157	5' UTR (1-265)	C|T|protein_coding|upstream_gene_variant|MODIFIER|-109C>T|
NC_045512.2	158	5' UTR (1-265)	A|G|protein_coding|upstream_gene_variant|MODIFIER|-108A>G|
NC_045512.2	160	5' UTR (1-265)	G|A|protein_coding|upstream_gene_variant|MODIFIER|-106G>A|
NC_045512.2	161	5' UTR (1-265)	A|T|protein_coding|upstream_gene_variant|MODIFIER|-105A>T|
NC_045512.2	162	5' UTR (1-265)	C|T|protein_coding|upstream_gene_variant|MODIFIER|-104C>T|
NC_045512.2	163	5' UTR (1-265)	A|C|protein_coding|upstream_gene_variant|MODIFIER|-103A>C|
NC_045512.2	164	5' UTR (1-265)	C|G|protein_coding|upstream_gene_variant|MODIFIER|-102C>G|
NC_045512.2	165	5' UTR (1-265)	G|A|protein_coding|upstream_gene_variant|MODIFIER|-101G>A|
NC_045512.2	167	5' UTR (1-265)	G|T|protein_coding|upstream_gene_variant|MODIFIER|-99G>T|
NC_045512.2	168	5' UTR (1-265)	T|A|protein_coding|upstream_gene_variant|MODIFIER|-98T>A|
NC_045512.2	169	5' UTR (1-265)	A|T|protein_coding|upstream_gene_variant|MODIFIER|-97A>T|
NC_045512.2	170	5' UTR (1-265)	A|C|protein_coding|upstream_gene_variant|MODIFIER|-96A>C|
NC_045512.2	173	5' UTR (1-265)	C|T|protein_coding|upstream_gene_variant|MODIFIER|-93C>T|
NC_045512.2	174	5' UTR (1-265)	G|T|protein_coding|upstream_gene_variant|MODIFIER|-92G>T|
NC_045512.2	176	5' UTR (1-265)	C|T|protein_coding|upstream_gene_variant|MODIFIER|-90C>T|
NC_045512.2	177	5' UTR (1-265)	T|C|protein_coding|upstream_gene_variant|MODIFIER|-89T>C|
NC_045512.2	178	5' UTR (1-265)	A|G|protein_coding|upstream_gene_variant|MODIFIER|-88A>G|
NC_045512.2	180	5' UTR (1-265)	C|T|protein_coding|upstream_gene_variant|MODIFIER|-86C>T|
NC_045512.2	181	5' UTR (1-265)	T|A|protein_coding|upstream_gene_variant|MODIFIER|-85T>A|
NC_045512.2	183	5' UTR (1-265)	C|T|protein_coding|upstream_gene_variant|MODIFIER|-83C>T|
NC_045512.2	184	5' UTR (1-265)	T|G|protein_coding|upstream_gene_variant|MODIFIER|-82T>G|
NC_045512.2	185	5' UTR (1-265)	G|T|protein_coding|upstream_gene_variant|MODIFIER|-81G>T|
NC_045512.2	186	5' UTR (1-265)	C|T|protein_coding|upstream_gene_variant|MODIFIER|-80C>T|
NC_045512.2	187	5' UTR (1-265)	A|G|protein_coding|upstream_gene_variant|MODIFIER|-79A>G|
NC_045512.2	188	5' UTR (1-265)	G|A|protein_coding|upstream_gene_variant|MODIFIER|-78G>A|
NC_045512.2	189	5' UTR (1-265)	G|A|protein_coding|upstream_gene_variant|MODIFIER|-77G>A|
NC_045512.2	190	5' UTR (1-265)	C|T|protein_coding|upstream_gene_variant|MODIFIER|-76C>T|
NC_045512.2	191	5' UTR (1-265)	T|C|protein_coding|upstream_gene_variant|MODIFIER|-75T>C|
NC_045512.2	193	5' UTR (1-265)	C|T|protein_coding|upstream_gene_variant|MODIFIER|-73C>T|
NC_045512.2	194	5' UTR (1-265)	T|C|protein_coding|upstream_gene_variant|MODIFIER|-72T>C|
NC_045512.2	195	5' UTR (1-265)	T|C|protein_coding|upstream_gene_variant|MODIFIER|-71T>C|
NC_045512.2	197	5' UTR (1-265)	C|T|protein_coding|upstream_gene_variant|MODIFIER|-69C>T|
NC_045512.2	198	5' UTR (1-265)	G|A|protein_coding|upstream_gene_variant|MODIFIER|-68G>A|
NC_045512.2	199	5' UTR (1-265)	G|T|protein_coding|upstream_gene_variant|MODIFIER|-67G>T|
NC_045512.2	201	5' UTR (1-265)	T|C|protein_coding|upstream_gene_variant|MODIFIER|-65T>C|
NC_045512.2	202	5' UTR (1-265)	T|C|protein_coding|upstream_gene_variant|MODIFIER|-64T>C|
NC_045512.2	203	5' UTR (1-265)	C|T|protein_coding|upstream_gene_variant|MODIFIER|-63C>T|
NC_045512.2	204	5' UTR (1-265)	G|T|protein_coding|upstream_gene_variant|MODIFIER|-62G>T|
NC_045512.2	205	5' UTR (1-265)	T|C|protein_coding|upstream_gene_variant|MODIFIER|-61T>C|
NC_045512.2	206	5' UTR (1-265)	C|T|protein_coding|upstream_gene_variant|MODIFIER|-60C>T|
NC_045512.2	207	5' UTR (1-265)	C|T|protein_coding|upstream_gene_variant|MODIFIER|-59C>T|
NC_045512.2	208	5' UTR (1-265)	G|T|protein_coding|upstream_gene_variant|MODIFIER|-58G>T|
NC_045512.2	210	5' UTR (1-265)	G|T|protein_coding|upstream_gene_variant|MODIFIER|-56G>T|
NC_045512.2	211	5' UTR (1-265)	T|C|protein_coding|upstream_gene_variant|MODIFIER|-55T>C|
NC_045512.2	212	5' UTR (1-265)	T|C|protein_coding|upstream_gene_variant|MODIFIER|-54T>C|
NC_045512.2	213	5' UTR (1-265)	G|A|protein_coding|upstream_gene_variant|MODIFIER|-53G>A|
NC_045512.2	215	5' UTR (1-265)	A|T|protein_coding|upstream_gene_variant|MODIFIER|-51A>T|
NC_045512.2	216	5' UTR (1-265)	G|T|protein_coding|upstream_gene_variant|MODIFIER|-50G>T|
NC_045512.2	217	5' UTR (1-265)	C|T|protein_coding|upstream_gene_variant|MODIFIER|-49C>T|
NC_045512.2	218	5' UTR (1-265)	C|T|protein_coding|upstream_gene_variant|MODIFIER|-48C>T|
NC_045512.2	219	5' UTR (1-265)	G|T|protein_coding|upstream_gene_variant|MODIFIER|-47G>T|
NC_045512.2	221	5' UTR (1-265)	T|G|protein_coding|upstream_gene_variant|MODIFIER|-45T>G|
NC_045512.2	222	5' UTR (1-265)	C|T|protein_coding|upstream_gene_variant|MODIFIER|-44C>T|
NC_045512.2	223	5' UTR (1-265)	A|T|protein_coding|upstream_gene_variant|MODIFIER|-43A>T|
NC_045512.2	224	5' UTR (1-265)	T|A|protein_coding|upstream_gene_variant|MODIFIER|-42T>A|
NC_045512.2	225	5' UTR (1-265)	C|T|protein_coding|upstream_gene_variant|MODIFIER|-41C>T|
NC_045512.2	226	5' UTR (1-265)	A|G|protein_coding|upstream_gene_variant|MODIFIER|-40A>G|
NC_045512.2	227	5' UTR (1-265)	G|A|protein_coding|upstream_gene_variant|MODIFIER|-39G>A|
NC_045512.2	228	5' UTR (1-265)	C|T|protein_coding|upstream_gene_variant|MODIFIER|-38C>T|
NC_045512.2	229	5' UTR (1-265)	A|C|protein_coding|upstream_gene_variant|MODIFIER|-37A>C|
NC_045512.2	231	5' UTR (1-265)	A|G|protein_coding|upstream_gene_variant|MODIFIER|-35A>G|
NC_045512.2	232	5' UTR (1-265)	T|C|protein_coding|upstream_gene_variant|MODIFIER|-34T>C|
NC_045512.2	233	5' UTR (1-265)	C|A|protein_coding|upstream_gene_variant|MODIFIER|-33C>A|
NC_045512.2	235	5' UTR (1-265)	A|G|protein_coding|upstream_gene_variant|MODIFIER|-31A>G|
NC_045512.2	236	5' UTR (1-265)	G|A|protein_coding|upstream_gene_variant|MODIFIER|-30G>A|
NC_045512.2	237	5' UTR (1-265)	G|T|protein_coding|upstream_gene_variant|MODIFIER|-29G>T|
NC_045512.2	238	5' UTR (1-265)	T|A|protein_coding|upstream_gene_variant|MODIFIER|-28T>A|
NC_045512.2	239	5' UTR (1-265)	T|A|protein_coding|upstream_gene_variant|MODIFIER|-27T>A|
NC_045512.2	240	5' UTR (1-265)	T|C|protein_coding|upstream_gene_variant|MODIFIER|-26T>C|
NC_045512.2	241	5' UTR (1-265)	C|T|protein_coding|upstream_gene_variant|MODIFIER|-25C>T|
NC_045512.2	242	5' UTR (1-265)	G|T|protein_coding|upstream_gene_variant|MODIFIER|-24G>T|
NC_045512.2	243	5' UTR (1-265)	T|A|protein_coding|upstream_gene_variant|MODIFIER|-23T>A|
NC_045512.2	244	5' UTR (1-265)	C|A|protein_coding|upstream_gene_variant|MODIFIER|-22C>A|
NC_045512.2	245	5' UTR (1-265)	C|A|protein_coding|upstream_gene_variant|MODIFIER|-21C>A|
NC_045512.2	246	5' UTR (1-265)	G|T|protein_coding|upstream_gene_variant|MODIFIER|-20G>T|
NC_045512.2	247	5' UTR (1-265)	G|A|protein_coding|upstream_gene_variant|MODIFIER|-19G>A|
NC_045512.2	249	5' UTR (1-265)	T|C|protein_coding|upstream_gene_variant|MODIFIER|-17T>C|
NC_045512.2	251	5' UTR (1-265)	T|C|protein_coding|upstream_gene_variant|MODIFIER|-15T>C|
NC_045512.2	252	5' UTR (1-265)	G|T|protein_coding|upstream_gene_variant|MODIFIER|-14G>T|
NC_045512.2	253	5' UTR (1-265)	A|G|protein_coding|upstream_gene_variant|MODIFIER|-13A>G|
NC_045512.2	256	5' UTR (1-265)	G|A|protein_coding|upstream_gene_variant|MODIFIER|-10G>A|
NC_045512.2	257	5' UTR (1-265)	A|T|protein_coding|upstream_gene_variant|MODIFIER|-9A>T|
NC_045512.2	258	5' UTR (1-265)	A|C|protein_coding|upstream_gene_variant|MODIFIER|-8A>C|
NC_045512.2	259	5' UTR (1-265)	A|G|protein_coding|upstream_gene_variant|MODIFIER|-7A>G|
NC_045512.2	260	5' UTR (1-265)	G|A|protein_coding|upstream_gene_variant|MODIFIER|-6G>A|
NC_045512.2	261	5' UTR (1-265)	G|C|protein_coding|upstream_gene_variant|MODIFIER|-5G>C|
NC_045512.2	262	5' UTR (1-265)	T|C|protein_coding|upstream_gene_variant|MODIFIER|-4T>C|
NC_045512.2	263	5' UTR (1-265)	A|G|protein_coding|upstream_gene_variant|MODIFIER|-3A>G|
NC_045512.2	269	nsp1 (266-806)	G|A|protein_coding|missense_variant|MODERATE|4G>A|Glu2Lys
NC_045512.2	270	nsp1 (266-806)	A|G|protein_coding|missense_variant|MODERATE|5A>G|Glu2Gly
NC_045512.2	271	nsp1 (266-806)	G|T|protein_coding|missense_variant|MODERATE|6G>T|Glu2Asp
NC_045512.2	272	nsp1 (266-806)	A|G|protein_coding|missense_variant|MODERATE|7A>G|Ser3Gly
NC_045512.2	273	nsp1 (266-806)	G|A|protein_coding|missense_variant|MODERATE|8G>A|Ser3Asn
NC_045512.2	274	nsp1 (266-806)	C|T|protein_coding|synonymous_variant|LOW|9C>T|Ser3Ser
NC_045512.2	280	nsp1 (266-806)	C|T|protein_coding|synonymous_variant|LOW|15C>T|Val5Val
NC_045512.2	283	nsp1 (266-806)	T|C|protein_coding|synonymous_variant|LOW|18T>C|Pro6Pro
NC_045512.2	284	nsp1 (266-806)	G|T|protein_coding|missense_variant|MODERATE|19G>T|Gly7Cys
NC_045512.2	285	nsp1 (266-806)	G|A|protein_coding|missense_variant|MODERATE|20G>A|Gly7Asp
NC_045512.2	287	nsp1 (266-806)	T|G|protein_coding|missense_variant|MODERATE|22T>G|Phe8Val
NC_045512.2	288	nsp1 (266-806)	T|G|protein_coding|missense_variant|MODERATE|23T>G|Phe8Cys
NC_045512.2	289	nsp1 (266-806)	C|A|protein_coding|missense_variant|MODERATE|24C>A|Phe8Leu
NC_045512.2	290	nsp1 (266-806)	A|T|protein_coding|missense_variant|MODERATE|25A>T|Asn9Tyr
NC_045512.2	292	nsp1 (266-806)	C|T|protein_coding|synonymous_variant|LOW|27C>T|Asn9Asn
NC_045512.2	293	nsp1 (266-806)	G|A|protein_coding|missense_variant|MODERATE|28G>A|Glu10Lys
NC_045512.2	295	nsp1 (266-806)	G|A|protein_coding|synonymous_variant|LOW|30G>A|Glu10Glu
NC_045512.2	301	nsp1 (266-806)	A|G|protein_coding|synonymous_variant|LOW|36A>G|Thr12Thr
NC_045512.2	302	nsp1 (266-806)	C|T|protein_coding|missense_variant|MODERATE|37C>T|His13Tyr
NC_045512.2	304	nsp1 (266-806)	C|T|protein_coding|synonymous_variant|LOW|39C>T|His13His
NC_045512.2	307	nsp1 (266-806)	C|T|protein_coding|synonymous_variant|LOW|42C>T|Val14Val
NC_045512.2	309	nsp1 (266-806)	A|T|protein_coding|missense_variant|MODERATE|44A>T|Gln15Leu
NC_045512.2	313	nsp1 (266-806)	C|T|protein_coding|synonymous_variant|LOW|48C>T|Leu16Leu
NC_045512.2	314	nsp1 (266-806)	A|T|protein_coding|missense_variant|MODERATE|49A>T|Ser17Cys
NC_045512.2	315	nsp1 (266-806)	G|T|protein_coding|missense_variant|MODERATE|50G>T|Ser17Ile
NC_045512.2	319	nsp1 (266-806)	G|A|protein_coding|synonymous_variant|LOW|54G>A|Leu18Leu
NC_045512.2	327	nsp1 (266-806)	T|C|protein_coding|missense_variant|MODERATE|62T>C|Leu21Ser
NC_045512.2	331	nsp1 (266-806)	G|A|protein_coding|synonymous_variant|LOW|66G>A|Gln22Gln
NC_045512.2	332	nsp1 (266-806)	G|T|protein_coding|missense_variant|MODERATE|67G>T|Val23Phe
NC_045512.2	333	nsp1 (266-806)	T|C|protein_coding|missense_variant|MODERATE|68T>C|Val23Ala
NC_045512.2	334	nsp1 (266-806)	T|C|protein_coding|synonymous_variant|LOW|69T>C|Val23Val
NC_045512.2	337	nsp1 (266-806)	C|T|protein_coding|synonymous_variant|LOW|72C>T|Arg24Arg
NC_045512.2	338	nsp1 (266-806)	G|A|protein_coding|missense_variant|MODERATE|73G>A|Asp25Asn
NC_045512.2	339	nsp1 (266-806)	A|G|protein_coding|missense_variant|MODERATE|74A>G|Asp25Gly
NC_045512.2	340	nsp1 (266-806)	C|T|protein_coding|synonymous_variant|LOW|75C>T|Asp25Asp
NC_045512.2	343	nsp1 (266-806)	G|T|protein_coding|synonymous_variant|LOW|78G>T|Val26Val
NC_045512.2	344	nsp1 (266-806)	C|T|protein_coding|missense_variant|MODERATE|79C>T|Leu27Phe
NC_045512.2	345	nsp1 (266-806)	T|G|protein_coding|missense_variant|MODERATE|80T>G|Leu27Arg
NC_045512.2	346	nsp1 (266-806)	C|T|protein_coding|synonymous_variant|LOW|81C>T|Leu27Leu
NC_045512.2	347	nsp1 (266-806)	G|A|protein_coding|missense_variant|MODERATE|82G>A|Val28Ile
NC_045512.2	348	nsp1 (266-806)	T|A|protein_coding|missense_variant|MODERATE|83T>A|Val28Glu
NC_045512.2	350	nsp1 (266-806)	C|T|protein_coding|missense_variant|MODERATE|85C>T|Arg29Cys
NC_045512.2	351	nsp1 (266-806)	G|A|protein_coding|missense_variant|MODERATE|86G>A|Arg29His
NC_045512.2	353	nsp1 (266-806)	G|A|protein_coding|missense_variant|MODERATE|88G>A|Gly30Ser
NC_045512.2	354	nsp1 (266-806)	G|A|protein_coding|missense_variant|MODERATE|89G>A|Gly30Asp
NC_045512.2	355	nsp1 (266-806)	C|T|protein_coding|synonymous_variant|LOW|90C>T|Gly30Gly
NC_045512.2	356	nsp1 (266-806)	T|C|protein_coding|missense_variant|MODERATE|91T>C|Phe31Leu
NC_045512.2	358	nsp1 (266-806)	T|A|protein_coding|missense_variant|MODERATE|93T>A|Phe31Leu
NC_045512.2	360	nsp1 (266-806)	G|A|protein_coding|missense_variant|MODERATE|95G>A|Gly32Glu
NC_045512.2	361	nsp1 (266-806)	A|G|protein_coding|synonymous_variant|LOW|96A>G|Gly32Gly
NC_045512.2	362	nsp1 (266-806)	G|A|protein_coding|missense_variant|MODERATE|97G>A|Asp33Asn
NC_045512.2	363	nsp1 (266-806)	A|G|protein_coding|missense_variant|MODERATE|98A>G|Asp33Gly
NC_045512.2	364	nsp1 (266-806)	C|A|protein_coding|missense_variant|MODERATE|99C>A|Asp33Glu
NC_045512.2	366	nsp1 (266-806)	C|T|protein_coding|missense_variant|MODERATE|101C>T|Ser34Phe
NC_045512.2	367	nsp1 (266-806)	C|T|protein_coding|synonymous_variant|LOW|102C>T|Ser34Ser
NC_045512.2	368	nsp1 (266-806)	G|T|protein_coding|missense_variant|MODERATE|103G>T|Val35Leu
NC_045512.2	370	nsp1 (266-806)	G|T|protein_coding|synonymous_variant|LOW|105G>T|Val35Val
NC_045512.2	371	nsp1 (266-806)	G|T|protein_coding|stop_gained|HIGH|106G>T|Glu36*
NC_045512.2	372	nsp1 (266-806)	A|C|protein_coding|missense_variant|MODERATE|107A>C|Glu36Ala
NC_045512.2	373	nsp1 (266-806)	G|A|protein_coding|synonymous_variant|LOW|108G>A|Glu36Glu
NC_045512.2	374	nsp1 (266-806)	G|A|protein_coding|missense_variant|MODERATE|109G>A|Glu37Lys
NC_045512.2	375	nsp1 (266-806)	A|G|protein_coding|missense_variant|MODERATE|110A>G|Glu37Gly
NC_045512.2	376	nsp1 (266-806)	G|T|protein_coding|missense_variant|MODERATE|111G>T|Glu37Asp
NC_045512.2	377	nsp1 (266-806)	G|T|protein_coding|missense_variant|MODERATE|112G>T|Val38Phe
NC_045512.2	378	nsp1 (266-806)	T|C|protein_coding|missense_variant|MODERATE|113T>C|Val38Ala
NC_045512.2	379	nsp1 (266-806)	C|A|protein_coding|synonymous_variant|LOW|114C>A|Val38Val
NC_045512.2	381	nsp1 (266-806)	T|G|protein_coding|stop_gained|HIGH|116T>G|Leu39*
NC_045512.2	383	nsp1 (266-806)	T|C|protein_coding|missense_variant|MODERATE|118T>C|Ser40Pro
NC_045512.2	385	nsp1 (266-806)	A|G|protein_coding|synonymous_variant|LOW|120A>G|Ser40Ser
NC_045512.2	387	nsp1 (266-806)	A|G|protein_coding|missense_variant|MODERATE|122A>G|Glu41Gly
NC_045512.2	391	nsp1 (266-806)	A|G|protein_coding|synonymous_variant|LOW|126A>G|Ala42Ala
NC_045512.2	392	nsp1 (266-806)	C|T|protein_coding|missense_variant|MODERATE|127C>T|Arg43Cys
NC_045512.2	393	nsp1 (266-806)	G|A|protein_coding|missense_variant|MODERATE|128G>A|Arg43His
NC_045512.2	394	nsp1 (266-806)	T|C|protein_coding|synonymous_variant|LOW|129T>C|Arg43Arg
NC_045512.2	395	nsp1 (266-806)	C|T|protein_coding|stop_gained|HIGH|130C>T|Gln44*
NC_045512.2	398	nsp1 (266-806)	C|T|protein_coding|missense_variant|MODERATE|133C>T|His45Tyr
NC_045512.2	400	nsp1 (266-806)	T|C|protein_coding|synonymous_variant|LOW|135T>C|His45His
NC_045512.2	404	nsp1 (266-806)	A|T|protein_coding|stop_gained|HIGH|139A>T|Lys47*
NC_045512.2	406	nsp1 (266-806)	A|G|protein_coding|synonymous_variant|LOW|141A>G|Lys47Lys
NC_045512.2	409	nsp1 (266-806)	T|C|protein_coding|synonymous_variant|LOW|144T>C|Asp48Asp
NC_045512.2	412	nsp1 (266-806)	C|G|protein_coding|synonymous_variant|LOW|147C>G|Gly49Gly
NC_045512.2	414	nsp1 (266-806)	C|T|protein_coding|missense_variant|MODERATE|149C>T|Thr50Ile
NC_045512.2	415	nsp1 (266-806)	T|G|protein_coding|synonymous_variant|LOW|150T>G|Thr50Thr
NC_045512.2	419	nsp1 (266-806)	G|A|protein_coding|missense_variant|MODERATE|154G>A|Gly52Ser
NC_045512.2	421	nsp1 (266-806)	C|T|protein_coding|synonymous_variant|LOW|156C>T|Gly52Gly
NC_045512.2	422	nsp1 (266-806)	T|G|protein_coding|missense_variant|MODERATE|157T>G|Leu53Val
NC_045512.2	425	nsp1 (266-806)	G|A|protein_coding|missense_variant|MODERATE|160G>A|Val54Ile
NC_045512.2	426	nsp1 (266-806)	T|C|protein_coding|missense_variant|MODERATE|161T>C|Val54Ala
NC_045512.2	427	nsp1 (266-806)	A|T|protein_coding|synonymous_variant|LOW|162A>T|Val54Val
NC_045512.2	428	nsp1 (266-806)	G|A|protein_coding|missense_variant|MODERATE|163G>A|Glu55Lys
NC_045512.2	431	nsp1 (266-806)	G|A|protein_coding|missense_variant|MODERATE|166G>A|Val56Ile
NC_045512.2	432	nsp1 (266-806)	T|C|protein_coding|missense_variant|MODERATE|167T>C|Val56Ala
NC_045512.2	433	nsp1 (266-806)	T|C|protein_coding|synonymous_variant|LOW|168T>C|Val56Val
NC_045512.2	435	nsp1 (266-806)	A|G|protein_coding|missense_variant|MODERATE|170A>G|Glu57Gly
NC_045512.2	436	nsp1 (266-806)	A|C|protein_coding|missense_variant|MODERATE|171A>C|Glu57Asp
NC_045512.2	438	nsp1 (266-806)	A|G|protein_coding|missense_variant|MODERATE|173A>G|Lys58Arg
NC_045512.2	439	nsp1 (266-806)	A|G|protein_coding|synonymous_variant|LOW|174A>G|Lys58Lys
NC_045512.2	441	nsp1 (266-806)	G|A|protein_coding|missense_variant|MODERATE|176G>A|Gly59Asp
NC_045512.2	442	nsp1 (266-806)	C|T|protein_coding|synonymous_variant|LOW|177C>T|Gly59Gly
NC_045512.2	443	nsp1 (266-806)	G|A|protein_coding|missense_variant|MODERATE|178G>A|Val60Ile
NC_045512.2	444	nsp1 (266-806)	T|C|protein_coding|missense_variant|MODERATE|179T>C|Val60Ala
NC_045512.2	445	nsp1 (266-806)	T|C|protein_coding|synonymous_variant|LOW|180T>C|Val60Val
NC_045512.2	446	nsp1 (266-806)	T|C|protein_coding|synonymous_variant|LOW|181T>C|Leu61Leu
NC_045512.2	447	nsp1 (266-806)	T|G|protein_coding|missense_variant|MODERATE|182T>G|Leu61Trp
NC_045512.2	449	nsp1 (266-806)	C|T|protein_coding|missense_variant|MODERATE|184C>T|Pro62Ser
NC_045512.2	450	nsp1 (266-806)	C|T|protein_coding|missense_variant|MODERATE|185C>T|Pro62Leu
NC_045512.2	454	nsp1 (266-806)	A|G|protein_coding|synonymous_variant|LOW|189A>G|Gln63Gln
NC_045512.2	455	nsp1 (266-806)	C|T|protein_coding|missense_variant|MODERATE|190C>T|Leu64Phe
NC_045512.2	457	nsp1 (266-806)	T|C|protein_coding|synonymous_variant|LOW|192T>C|Leu64Leu
NC_045512.2	458	nsp1 (266-806)	G|C|protein_coding|missense_variant|MODERATE|193G>C|Glu65Gln
NC_045512.2	459	nsp1 (266-806)	A|G|protein_coding|missense_variant|MODERATE|194A>G|Glu65Gly
NC_045512.2	460	nsp1 (266-806)	A|G|protein_coding|synonymous_variant|LOW|195A>G|Glu65Glu
NC_045512.2	462	nsp1 (266-806)	A|G|protein_coding|missense_variant|MODERATE|197A>G|Gln66Arg
NC_045512.2	463	nsp1 (266-806)	G|T|protein_coding|missense_variant|MODERATE|198G>T|Gln66His
NC_045512.2	466	nsp1 (266-806)	C|T|protein_coding|synonymous_variant|LOW|201C>T|Pro67Pro
NC_045512.2	467	nsp1 (266-806)	T|C|protein_coding|missense_variant|MODERATE|202T>C|Tyr68His
NC_045512.2	469	nsp1 (266-806)	T|C|protein_coding|synonymous_variant|LOW|204T>C|Tyr68Tyr
NC_045512.2	472	nsp1 (266-806)	G|T|protein_coding|synonymous_variant|LOW|207G>T|Val69Val
NC_045512.2	475	nsp1 (266-806)	C|T|protein_coding|synonymous_variant|LOW|210C>T|Phe70Phe
NC_045512.2	476	nsp1 (266-806)	A|G|protein_coding|missense_variant|MODERATE|211A>G|Ile71Val
NC_045512.2	478	nsp1 (266-806)	C|T|protein_coding|synonymous_variant|LOW|213C>T|Ile71Ile
NC_045512.2	479	nsp1 (266-806)	A|G|protein_coding|missense_variant|MODERATE|214A>G|Lys72Glu
NC_045512.2	481	nsp1 (266-806)	A|G|protein_coding|synonymous_variant|LOW|216A>G|Lys72Lys
NC_045512.2	482	nsp1 (266-806)	C|T|protein_coding|missense_variant|MODERATE|217C>T|Arg73Cys
NC_045512.2	484	nsp1 (266-806)	T|C|protein_coding|synonymous_variant|LOW|219T>C|Arg73Arg
NC_045512.2	485	nsp1 (266-806)	T|G|protein_coding|missense_variant|MODERATE|220T>G|Ser74Ala
NC_045512.2	486	nsp1 (266-806)	C|T|protein_coding|missense_variant|MODERATE|221C>T|Ser74Leu
NC_045512.2	487	nsp1 (266-806)	G|A|protein_coding|synonymous_variant|LOW|222G>A|Ser74Ser
NC_045512.2	490	nsp1 (266-806)	T|A|protein_coding|missense_variant|MODERATE|225T>A|Asp75Glu
NC_045512.2	491	nsp1 (266-806)	G|A|protein_coding|missense_variant|MODERATE|226G>A|Ala76Thr
NC_045512.2	492	nsp1 (266-806)	C|T|protein_coding|missense_variant|MODERATE|227C>T|Ala76Val
NC_045512.2	493	nsp1 (266-806)	T|C|protein_coding|synonymous_variant|LOW|228T>C|Ala76Ala
NC_045512.2	495	nsp1 (266-806)	G|T|protein_coding|missense_variant|MODERATE|230G>T|Arg77Leu
NC_045512.2	496	nsp1 (266-806)	A|G|protein_coding|synonymous_variant|LOW|231A>G|Arg77Arg
NC_045512.2	497	nsp1 (266-806)	A|G|protein_coding|missense_variant|MODERATE|232A>G|Thr78Ala
NC_045512.2	498	nsp1 (266-806)	C|T|protein_coding|missense_variant|MODERATE|233C>T|Thr78Ile
NC_045512.2	501	nsp1 (266-806)	C|T|protein_coding|missense_variant|MODERATE|236C>T|Ala79Val
NC_045512.2	503	nsp1 (266-806)	C|T|protein_coding|missense_variant|MODERATE|238C>T|Pro80Ser
NC_045512.2	505	nsp1 (266-806)	T|C|protein_coding|synonymous_variant|LOW|240T>C|Pro80Pro
NC_045512.2	506	nsp1 (266-806)	C|T|protein_coding|missense_variant|MODERATE|241C>T|His81Tyr
NC_045512.2	507	nsp1 (266-806)	A|G|protein_coding|missense_variant|MODERATE|242A>G|His81Arg
NC_045512.2	508	nsp1 (266-806)	T|C|protein_coding|synonymous_variant|LOW|243T>C|His81His
NC_045512.2	509	nsp1 (266-806)	G|A|protein_coding|missense_variant|MODERATE|244G>A|Gly82Ser
NC_045512.2	510	nsp1 (266-806)	G|A|protein_coding|missense_variant|MODERATE|245G>A|Gly82Asp
NC_045512.2	511	nsp1 (266-806)	T|C|protein_coding|synonymous_variant|LOW|246T>C|Gly82Gly
NC_045512.2	512	nsp1 (266-806)	C|T|protein_coding|missense_variant|MODERATE|247C>T|His83Tyr
NC_045512.2	513	nsp1 (266-806)	A|G|protein_coding|missense_variant|MODERATE|248A>G|His83Arg
NC_045512.2	514	nsp1 (266-806)	T|C|protein_coding|synonymous_variant|LOW|249T>C|His83His
NC_045512.2	515	nsp1 (266-806)	G|A|protein_coding|missense_variant|MODERATE|250G>A|Val84Ile
NC_045512.2	518	nsp1 (266-806)	A|G|protein_coding|missense_variant|MODERATE|253A>G|Met85Val
NC_045512.2	519	nsp1 (266-806)	T|A|protein_coding|missense_variant|MODERATE|254T>A|Met85Lys
NC_045512.2	520	nsp1 (266-806)	G|T|protein_coding|missense_variant|MODERATE|255G>T|Met85Ile
NC_045512.2	521	nsp1 (266-806)	G|T|protein_coding|missense_variant|MODERATE|256G>T|Val86Phe
NC_045512.2	523	nsp1 (266-806)	T|C|protein_coding|synonymous_variant|LOW|258T>C|Val86Val
NC_045512.2	524	nsp1 (266-806)	G|A|protein_coding|missense_variant|MODERATE|259G>A|Glu87Lys
NC_045512.2	525	nsp1 (266-806)	A|G|protein_coding|missense_variant|MODERATE|260A>G|Glu87Gly
NC_045512.2	526	nsp1 (266-806)	G|T|protein_coding|missense_variant|MODERATE|261G>T|Glu87Asp
NC_045512.2	527	nsp1 (266-806)	C|T|protein_coding|synonymous_variant|LOW|262C>T|Leu88Leu
NC_045512.2	529	nsp1 (266-806)	G|T|protein_coding|synonymous_variant|LOW|264G>T|Leu88Leu
NC_045512.2	530	nsp1 (266-806)	G|A|protein_coding|missense_variant|MODERATE|265G>A|Val89Ile
NC_045512.2	532	nsp1 (266-806)	A|T|protein_coding|synonymous_variant|LOW|267A>T|Val89Val
NC_045512.2	534	nsp1 (266-806)	C|T|protein_coding|missense_variant|MODERATE|269C>T|Ala90Val
NC_045512.2	535	nsp1 (266-806)	A|G|protein_coding|synonymous_variant|LOW|270A>G|Ala90Ala
NC_045512.2	538	nsp1 (266-806)	A|T|protein_coding|missense_variant|MODERATE|273A>T|Glu91Asp
NC_045512.2	539	nsp1 (266-806)	C|T|protein_coding|missense_variant|MODERATE|274C>T|Leu92Phe
NC_045512.2	540	nsp1 (266-806)	T|A|protein_coding|missense_variant|MODERATE|275T>A|Leu92His
NC_045512.2	541	nsp1 (266-806)	C|T|protein_coding|synonymous_variant|LOW|276C>T|Leu92Leu
NC_045512.2	542	nsp1 (266-806)	G|A|protein_coding|missense_variant|MODERATE|277G>A|Glu93Lys
NC_045512.2	544	nsp1 (266-806)	A|G|protein_coding|synonymous_variant|LOW|279A>G|Glu93Glu
NC_045512.2	545	nsp1 (266-806)	G|T|protein_coding|missense_variant|MODERATE|280G>T|Gly94Cys
NC_045512.2	547	nsp1 (266-806)	C|T|protein_coding|synonymous_variant|LOW|282C>T|Gly94Gly
NC_045512.2	548	nsp1 (266-806)	A|G|protein_coding|missense_variant|MODERATE|283A>G|Ile95Val
NC_045512.2	549	nsp1 (266-806)	T|C|protein_coding|missense_variant|MODERATE|284T>C|Ile95Thr
NC_045512.2	550	nsp1 (266-806)	T|C|protein_coding|synonymous_variant|LOW|285T>C|Ile95Ile
NC_045512.2	553	nsp1 (266-806)	G|T|protein_coding|missense_variant|MODERATE|288G>T|Gln96His
NC_045512.2	555	nsp1 (266-806)	A|G|protein_coding|missense_variant|MODERATE|290A>G|Tyr97Cys
NC_045512.2	558	nsp1 (266-806)	G|T|protein_coding|missense_variant|MODERATE|293G>T|Gly98Val
NC_045512.2	559	nsp1 (266-806)	T|C|protein_coding|synonymous_variant|LOW|294T>C|Gly98Gly
NC_045512.2	560	nsp1 (266-806)	C|T|protein_coding|missense_variant|MODERATE|295C>T|Arg99Cys
NC_045512.2	561	nsp1 (266-806)	G|A|protein_coding|missense_variant|MODERATE|296G>A|Arg99His
NC_045512.2	562	nsp1 (266-806)	T|A|protein_coding|synonymous_variant|LOW|297T>A|Arg99Arg
NC_045512.2	563	nsp1 (266-806)	A|T|protein_coding|missense_variant|MODERATE|298A>T|Ser100Cys
NC_045512.2	564	nsp1 (266-806)	G|A|protein_coding|missense_variant|MODERATE|299G>A|Ser100Asn
NC_045512.2	565	nsp1 (266-806)	T|C|protein_coding|synonymous_variant|LOW|300T>C|Ser100Ser
NC_045512.2	566	nsp1 (266-806)	G|A|protein_coding|missense_variant|MODERATE|301G>A|Gly101Ser
NC_045512.2	568	nsp1 (266-806)	T|C|protein_coding|synonymous_variant|LOW|303T>C|Gly101Gly
NC_045512.2	570	nsp1 (266-806)	A|G|protein_coding|missense_variant|MODERATE|305A>G|Glu102Gly
NC_045512.2	573	nsp1 (266-806)	C|T|protein_coding|missense_variant|MODERATE|308C>T|Thr103Ile
NC_045512.2	574	nsp1 (266-806)	A|G|protein_coding|synonymous_variant|LOW|309A>G|Thr103Thr
NC_045512.2	575	nsp1 (266-806)	C|T|protein_coding|missense_variant|MODERATE|310C>T|Leu104Phe
NC_045512.2	576	nsp1 (266-806)	T|A|protein_coding|missense_variant|MODERATE|311T>A|Leu104His
NC_045512.2	577	nsp1 (266-806)	T|C|protein_coding|synonymous_variant|LOW|312T>C|Leu104Leu
NC_045512.2	578	nsp1 (266-806)	G|A|protein_coding|missense_variant|MODERATE|313G>A|Gly105Ser
NC_045512.2	579	nsp1 (266-806)	G|T|protein_coding|missense_variant|MODERATE|314G>T|Gly105Val
NC_045512.2	580	nsp1 (266-806)	T|A|protein_coding|synonymous_variant|LOW|315T>A|Gly105Gly
NC_045512.2	581	nsp1 (266-806)	G|A|protein_coding|missense_variant|MODERATE|316G>A|Val106Ile
NC_045512.2	582	nsp1 (266-806)	T|C|protein_coding|missense_variant|MODERATE|317T>C|Val106Ala
NC_045512.2	583	nsp1 (266-806)	C|T|protein_coding|synonymous_variant|LOW|318C>T|Val106Val
NC_045512.2	584	nsp1 (266-806)	C|T|protein_coding|missense_variant|MODERATE|319C>T|Leu107Phe
NC_045512.2	586	nsp1 (266-806)	T|C|protein_coding|synonymous_variant|LOW|321T>C|Leu107Leu
NC_045512.2	588	nsp1 (266-806)	T|C|protein_coding|missense_variant|MODERATE|323T>C|Val108Ala
NC_045512.2	589	nsp1 (266-806)	C|T|protein_coding|synonymous_variant|LOW|324C>T|Val108Val
NC_045512.2	590	nsp1 (266-806)	C|T|protein_coding|missense_variant|MODERATE|325C>T|Pro109Ser
NC_045512.2	591	nsp1 (266-806)	C|A|protein_coding|missense_variant|MODERATE|326C>A|Pro109His
NC_045512.2	592	nsp1 (266-806)	T|C|protein_coding|synonymous_variant|LOW|327T>C|Pro109Pro
NC_045512.2	593	nsp1 (266-806)	C|T|protein_coding|missense_variant|MODERATE|328C>T|His110Tyr
NC_045512.2	595	nsp1 (266-806)	T|C|protein_coding|synonymous_variant|LOW|330T>C|His110His
NC_045512.2	596	nsp1 (266-806)	G|T|protein_coding|missense_variant|MODERATE|331G>T|Val111Leu
NC_045512.2	598	nsp1 (266-806)	G|T|protein_coding|synonymous_variant|LOW|333G>T|Val111Val
NC_045512.2	599	nsp1 (266-806)	G|A|protein_coding|missense_variant|MODERATE|334G>A|Gly112Ser
NC_045512.2	600	nsp1 (266-806)	G|A|protein_coding|missense_variant|MODERATE|335G>A|Gly112Asp
NC_045512.2	601	nsp1 (266-806)	C|T|protein_coding|synonymous_variant|LOW|336C>T|Gly112Gly
NC_045512.2	602	nsp1 (266-806)	G|A|protein_coding|missense_variant|MODERATE|337G>A|Glu113Lys
NC_045512.2	603	nsp1 (266-806)	A|C|protein_coding|missense_variant|MODERATE|338A>C|Glu113Ala
NC_045512.2	606	nsp1 (266-806)	T|C|protein_coding|missense_variant|MODERATE|341T>C|Ile114Thr
NC_045512.2	607	nsp1 (266-806)	A|G|protein_coding|missense_variant|MODERATE|342A>G|Ile114Met
NC_045512.2	608	nsp1 (266-806)	C|T|protein_coding|missense_variant|MODERATE|343C>T|Pro115Ser
NC_045512.2	609	nsp1 (266-806)	C|T|protein_coding|missense_variant|MODERATE|344C>T|Pro115Leu
NC_045512.2	610	nsp1 (266-806)	A|G|protein_coding|synonymous_variant|LOW|345A>G|Pro115Pro
NC_045512.2	611	nsp1 (266-806)	G|A|protein_coding|missense_variant|MODERATE|346G>A|Val116Met
NC_045512.2	612	nsp1 (266-806)	T|C|protein_coding|missense_variant|MODERATE|347T>C|Val116Ala
NC_045512.2	613	nsp1 (266-806)	G|A|protein_coding|synonymous_variant|LOW|348G>A|Val116Val
NC_045512.2	614	nsp1 (266-806)	G|T|protein_coding|missense_variant|MODERATE|349G>T|Ala117Ser
NC_045512.2	615	nsp1 (266-806)	C|T|protein_coding|missense_variant|MODERATE|350C>T|Ala117Val
NC_045512.2	617	nsp1 (266-806)	T|C|protein_coding|missense_variant|MODERATE|352T>C|Tyr118His
NC_045512.2	618	nsp1 (266-806)	A|G|protein_coding|missense_variant|MODERATE|353A>G|Tyr118Cys
NC_045512.2	619	nsp1 (266-806)	C|T|protein_coding|synonymous_variant|LOW|354C>T|Tyr118Tyr
NC_045512.2	620	nsp1 (266-806)	C|T|protein_coding|missense_variant|MODERATE|355C>T|Arg119Cys
NC_045512.2	621	nsp1 (266-806)	G|A|protein_coding|missense_variant|MODERATE|356G>A|Arg119His
NC_045512.2	622	nsp1 (266-806)	C|T|protein_coding|synonymous_variant|LOW|357C>T|Arg119Arg
NC_045512.2	623	nsp1 (266-806)	A|G|protein_coding|missense_variant|MODERATE|358A>G|Lys120Glu
NC_045512.2	625	nsp1 (266-806)	G|T|protein_coding|missense_variant|MODERATE|360G>T|Lys120Asn
NC_045512.2	626	nsp1 (266-806)	G|T|protein_coding|missense_variant|MODERATE|361G>T|Val121Phe
NC_045512.2	627	nsp1 (266-806)	T|A|protein_coding|missense_variant|MODERATE|362T>A|Val121Asp
NC_045512.2	629	nsp1 (266-806)	C|T|protein_coding|missense_variant|MODERATE|364C>T|Leu122Phe
NC_045512.2	630	nsp1 (266-806)	T|G|protein_coding|missense_variant|MODERATE|365T>G|Leu122Arg
NC_045512.2	631	nsp1 (266-806)	T|C|protein_coding|synonymous_variant|LOW|366T>C|Leu122Leu
NC_045512.2	632	nsp1 (266-806)	C|T|protein_coding|missense_variant|MODERATE|367C>T|Leu123Phe
NC_045512.2	634	nsp1 (266-806)	T|C|protein_coding|synonymous_variant|LOW|369T>C|Leu123Leu
NC_045512.2	635	nsp1 (266-806)	C|T|protein_coding|missense_variant|MODERATE|370C>T|Arg124Cys
NC_045512.2	640	nsp1 (266-806)	G|A|protein_coding|synonymous_variant|LOW|375G>A|Lys125Lys
NC_045512.2	642	nsp1 (266-806)	A|G|protein_coding|missense_variant|MODERATE|377A>G|Asn126Ser
NC_045512.2	643	nsp1 (266-806)	C|T|protein_coding|synonymous_variant|LOW|378C>T|Asn126Asn
NC_045512.2	645	nsp1 (266-806)	G|A|protein_coding|missense_variant|MODERATE|380G>A|Gly127Asp
NC_045512.2	646	nsp1 (266-806)	T|C|protein_coding|synonymous_variant|LOW|381T>C|Gly127Gly
NC_045512.2	647	nsp1 (266-806)	A|G|protein_coding|missense_variant|MODERATE|382A>G|Asn128Asp
NC_045512.2	652	nsp1 (266-806)	A|T|protein_coding|missense_variant|MODERATE|387A>T|Lys129Asn
NC_045512.2	654	nsp1 (266-806)	G|A|protein_coding|missense_variant|MODERATE|389G>A|Gly130Glu
NC_045512.2	655	nsp1 (266-806)	A|G|protein_coding|synonymous_variant|LOW|390A>G|Gly130Gly
NC_045512.2	656	nsp1 (266-806)	G|A|protein_coding|missense_variant|MODERATE|391G>A|Ala131Thr
NC_045512.2	657	nsp1 (266-806)	C|T|protein_coding|missense_variant|MODERATE|392C>T|Ala131Val
NC_045512.2	658	nsp1 (266-806)	T|C|protein_coding|synonymous_variant|LOW|393T>C|Ala131Ala
NC_045512.2	659	nsp1 (266-806)	G|A|protein_coding|missense_variant|MODERATE|394G>A|Gly132Ser
NC_045512.2	660	nsp1 (266-806)	G|A|protein_coding|missense_variant|MODERATE|395G>A|Gly132Asp
NC_045512.2	661	nsp1 (266-806)	T|C|protein_coding|synonymous_variant|LOW|396T>C|Gly132Gly
NC_045512.2	662	nsp1 (266-806)	G|T|protein_coding|missense_variant|MODERATE|397G>T|Gly133Cys
NC_045512.2	663	nsp1 (266-806)	G|A|protein_coding|missense_variant|MODERATE|398G>A|Gly133Asp
NC_045512.2	664	nsp1 (266-806)	C|T|protein_coding|synonymous_variant|LOW|399C>T|Gly133Gly
NC_045512.2	667	nsp1 (266-806)	T|C|protein_coding|synonymous_variant|LOW|402T>C|His134His
NC_045512.2	670	nsp1 (266-806)	T|C|protein_coding|synonymous_variant|LOW|405T>C|Ser135Ser
NC_045512.2	672	nsp1 (266-806)	A|G|protein_coding|missense_variant|MODERATE|407A>G|Tyr136Cys
NC_045512.2	673	nsp1 (266-806)	C|T|protein_coding|synonymous_variant|LOW|408C>T|Tyr136Tyr
NC_045512.2	674	nsp1 (266-806)	G|A|protein_coding|missense_variant|MODERATE|409G>A|Gly137Ser
NC_045512.2	675	nsp1 (266-806)	G|T|protein_coding|missense_variant|MODERATE|410G>T|Gly137Val
NC_045512.2	676	nsp1 (266-806)	C|T|protein_coding|synonymous_variant|LOW|411C>T|Gly137Gly
NC_045512.2	677	nsp1 (266-806)	G|A|protein_coding|missense_variant|MODERATE|412G>A|Ala138Thr
NC_045512.2	678	nsp1 (266-806)	C|T|protein_coding|missense_variant|MODERATE|413C>T|Ala138Val
NC_045512.2	680	nsp1 (266-806)	G|A|protein_coding|missense_variant|MODERATE|415G>A|Asp139Asn
NC_045512.2	681	nsp1 (266-806)	A|G|protein_coding|missense_variant|MODERATE|416A>G|Asp139Gly
NC_045512.2	682	nsp1 (266-806)	T|C|protein_coding|synonymous_variant|LOW|417T>C|Asp139Asp
NC_045512.2	683	nsp1 (266-806)	C|T|protein_coding|synonymous_variant|LOW|418C>T|Leu140Leu
NC_045512.2	686	nsp1 (266-806)	A|G|protein_coding|missense_variant|MODERATE|421A>G|Lys141Glu
NC_045512.2	687	nsp1 (266-806)	A|G|protein_coding|missense_variant|MODERATE|422A>G|Lys141Arg
NC_045512.2	689	nsp1 (266-806)	T|C|protein_coding|missense_variant|MODERATE|424T>C|Ser142Pro
NC_045512.2	690	nsp1 (266-806)	C|T|protein_coding|missense_variant|MODERATE|425C>T|Ser142Leu
NC_045512.2	691	nsp1 (266-806)	A|G|protein_coding|synonymous_variant|LOW|426A>G|Ser142Ser
NC_045512.2	692	nsp1 (266-806)	T|A|protein_coding|missense_variant|MODERATE|427T>A|Phe143Ile
NC_045512.2	693	nsp1 (266-806)	T|G|protein_coding|missense_variant|MODERATE|428T>G|Phe143Cys
NC_045512.2	694	nsp1 (266-806)	T|C|protein_coding|synonymous_variant|LOW|429T>C|Phe143Phe
NC_045512.2	696	nsp1 (266-806)	A|C|protein_coding|missense_variant|MODERATE|431A>C|Asp144Ala
NC_045512.2	697	nsp1 (266-806)	C|T|protein_coding|synonymous_variant|LOW|432C>T|Asp144Asp
NC_045512.2	700	nsp1 (266-806)	A|G|protein_coding|synonymous_variant|LOW|435A>G|Leu145Leu
NC_045512.2	701	nsp1 (266-806)	G|T|protein_coding|missense_variant|MODERATE|436G>T|Gly146Cys
NC_045512.2	702	nsp1 (266-806)	G|A|protein_coding|missense_variant|MODERATE|437G>A|Gly146Asp
NC_045512.2	703	nsp1 (266-806)	C|T|protein_coding|synonymous_variant|LOW|438C>T|Gly146Gly
NC_045512.2	704	nsp1 (266-806)	G|A|protein_coding|missense_variant|MODERATE|439G>A|Asp147Asn
NC_045512.2	705	nsp1 (266-806)	A|T|protein_coding|missense_variant|MODERATE|440A>T|Asp147Val
NC_045512.2	706	nsp1 (266-806)	C|T|protein_coding|synonymous_variant|LOW|441C>T|Asp147Asp
NC_045512.2	709	nsp1 (266-806)	G|T|protein_coding|missense_variant|MODERATE|444G>T|Glu148Asp
NC_045512.2	711	nsp1 (266-806)	T|A|protein_coding|missense_variant|MODERATE|446T>A|Leu149His
NC_045512.2	712	nsp1 (266-806)	T|A|protein_coding|synonymous_variant|LOW|447T>A|Leu149Leu
NC_045512.2	713	nsp1 (266-806)	G|T|protein_coding|missense_variant|MODERATE|448G>T|Gly150Cys
NC_045512.2	714	nsp1 (266-806)	G|A|protein_coding|missense_variant|MODERATE|449G>A|Gly150Asp
NC_045512.2	715	nsp1 (266-806)	C|T|protein_coding|synonymous_variant|LOW|450C>T|Gly150Gly
NC_045512.2	717	nsp1 (266-806)	C|G|protein_coding|missense_variant|MODERATE|452C>G|Thr151Ser
NC_045512.2	718	nsp1 (266-806)	T|C|protein_coding|synonymous_variant|LOW|453T>C|Thr151Thr
NC_045512.2	720	nsp1 (266-806)	A|G|protein_coding|missense_variant|MODERATE|455A>G|Asp152Gly
NC_045512.2	721	nsp1 (266-806)	T|C|protein_coding|synonymous_variant|LOW|456T>C|Asp152Asp
NC_045512.2	723	nsp1 (266-806)	C|T|protein_coding|missense_variant|MODERATE|458C>T|Pro153Leu
NC_045512.2	731	nsp1 (266-806)	G|C|protein_coding|missense_variant|MODERATE|466G>C|Asp156His
NC_045512.2	734	nsp1 (266-806)	T|C|protein_coding|missense_variant|MODERATE|469T>C|Phe157Leu
NC_045512.2	736	nsp1 (266-806)	T|C|protein_coding|synonymous_variant|LOW|471T>C|Phe157Phe
NC_045512.2	739	nsp1 (266-806)	A|G|protein_coding|synonymous_variant|LOW|474A>G|Gln158Gln
NC_045512.2	740	nsp1 (266-806)	G|A|protein_coding|missense_variant|MODERATE|475G>A|Glu159Lys
NC_045512.2	741	nsp1 (266-806)	A|G|protein_coding|missense_variant|MODERATE|476A>G|Glu159Gly
NC_045512.2	742	nsp1 (266-806)	A|G|protein_coding|synonymous_variant|LOW|477A>G|Glu159Glu
NC_045512.2	745	nsp1 (266-806)	C|T|protein_coding|synonymous_variant|LOW|480C>T|Asn160Asn
NC_045512.2	747	nsp1 (266-806)	G|T|protein_coding|missense_variant|MODERATE|482G>T|Trp161Leu
NC_045512.2	748	nsp1 (266-806)	G|T|protein_coding|missense_variant|MODERATE|483G>T|Trp161Cys
NC_045512.2	749	nsp1 (266-806)	A|T|protein_coding|missense_variant|MODERATE|484A>T|Asn162Tyr
NC_045512.2	751	nsp1 (266-806)	C|T|protein_coding|synonymous_variant|LOW|486C>T|Asn162Asn
NC_045512.2	753	nsp1 (266-806)	C|T|protein_coding|missense_variant|MODERATE|488C>T|Thr163Ile
NC_045512.2	758	nsp1 (266-806)	C|T|protein_coding|missense_variant|MODERATE|493C>T|His165Tyr
NC_045512.2	759	nsp1 (266-806)	A|T|protein_coding|missense_variant|MODERATE|494A>T|His165Leu
NC_045512.2	761	nsp1 (266-806)	A|G|protein_coding|missense_variant|MODERATE|496A>G|Ser166Gly
NC_045512.2	765	nsp1 (266-806)	G|C|protein_coding|missense_variant|MODERATE|500G>C|Ser167Thr
NC_045512.2	766	nsp1 (266-806)	T|C|protein_coding|synonymous_variant|LOW|501T>C|Ser167Ser
NC_045512.2	768	nsp1 (266-806)	G|T|protein_coding|missense_variant|MODERATE|503G>T|Gly168Val
NC_045512.2	769	nsp1 (266-806)	T|C|protein_coding|synonymous_variant|LOW|504T>C|Gly168Gly
NC_045512.2	771	nsp1 (266-806)	T|C|protein_coding|missense_variant|MODERATE|506T>C|Val169Ala
NC_045512.2	772	nsp1 (266-806)	T|C|protein_coding|synonymous_variant|LOW|507T>C|Val169Val
NC_045512.2	773	nsp1 (266-806)	A|G|protein_coding|missense_variant|MODERATE|508A>G|Thr170Ala
NC_045512.2	774	nsp1 (266-806)	C|T|protein_coding|missense_variant|MODERATE|509C>T|Thr170Ile
NC_045512.2	775	nsp1 (266-806)	C|T|protein_coding|synonymous_variant|LOW|510C>T|Thr170Thr
NC_045512.2	777	nsp1 (266-806)	G|A|protein_coding|missense_variant|MODERATE|512G>A|Arg171His
NC_045512.2	778	nsp1 (266-806)	T|C|protein_coding|synonymous_variant|LOW|513T>C|Arg171Arg
NC_045512.2	779	nsp1 (266-806)	G|C|protein_coding|missense_variant|MODERATE|514G>C|Glu172Gln
NC_045512.2	784	nsp1 (266-806)	C|T|protein_coding|synonymous_variant|LOW|519C>T|Leu173Leu
NC_045512.2	787	nsp1 (266-806)	G|T|protein_coding|missense_variant|MODERATE|522G>T|Met174Ile
NC_045512.2	788	nsp1 (266-806)	C|G|protein_coding|missense_variant|MODERATE|523C>G|Arg175Gly
NC_045512.2	789	nsp1 (266-806)	G|A|protein_coding|missense_variant|MODERATE|524G>A|Arg175His
NC_045512.2	792	nsp1 (266-806)	A|G|protein_coding|missense_variant|MODERATE|527A>G|Glu176Gly
NC_045512.2	796	nsp1 (266-806)	T|C|protein_coding|synonymous_variant|LOW|531T>C|Leu177Leu
NC_045512.2	798	nsp1 (266-806)	A|G|protein_coding|missense_variant|MODERATE|533A>G|Asn178Ser
NC_045512.2	799	nsp1 (266-806)	C|T|protein_coding|synonymous_variant|LOW|534C>T|Asn178Asn
NC_045512.2	800	nsp1 (266-806)	G|T|protein_coding|stop_gained|HIGH|535G>T|Gly179*
NC_045512.2	802	nsp1 (266-806)	A|G|protein_coding|synonymous_variant|LOW|537A>G|Gly179Gly
NC_045512.2	805	nsp1 (266-806)	G|A|protein_coding|synonymous_variant|LOW|540G>A|Gly180Gly
NC_045512.2	806	nsp1 (266-806)	G|A|protein_coding|missense_variant|MODERATE|541G>A|Ala181Thr
NC_045512.2	808	nsp2 (807-2720)	A|G|protein_coding|synonymous_variant|LOW|543A>G|Ala181Ala
NC_045512.2	809	nsp2 (807-2720)	T|A|protein_coding|missense_variant|MODERATE|544T>A|Tyr182Asn
NC_045512.2	810	nsp2 (807-2720)	A|G|protein_coding|missense_variant|MODERATE|545A>G|Tyr182Cys
NC_045512.2	811	nsp2 (807-2720)	C|T|protein_coding|synonymous_variant|LOW|546C>T|Tyr182Tyr
NC_045512.2	813	nsp2 (807-2720)	C|A|protein_coding|missense_variant|MODERATE|548C>A|Thr183Asn
NC_045512.2	814	nsp2 (807-2720)	T|C|protein_coding|synonymous_variant|LOW|549T>C|Thr183Thr
NC_045512.2	815	nsp2 (807-2720)	C|T|protein_coding|missense_variant|MODERATE|550C>T|Arg184Cys
NC_045512.2	816	nsp2 (807-2720)	G|A|protein_coding|missense_variant|MODERATE|551G>A|Arg184His
NC_045512.2	817	nsp2 (807-2720)	C|T|protein_coding|synonymous_variant|LOW|552C>T|Arg184Arg
NC_045512.2	818	nsp2 (807-2720)	T|C|protein_coding|missense_variant|MODERATE|553T>C|Tyr185His
NC_045512.2	823	nsp2 (807-2720)	C|T|protein_coding|synonymous_variant|LOW|558C>T|Val186Val
NC_045512.2	824	nsp2 (807-2720)	G|T|protein_coding|missense_variant|MODERATE|559G>T|Asp187Tyr
NC_045512.2	826	nsp2 (807-2720)	T|C|protein_coding|synonymous_variant|LOW|561T>C|Asp187Asp
NC_045512.2	828	nsp2 (807-2720)	A|G|protein_coding|missense_variant|MODERATE|563A>G|Asn188Ser
NC_045512.2	829	nsp2 (807-2720)	C|T|protein_coding|synonymous_variant|LOW|564C>T|Asn188Asn
NC_045512.2	832	nsp2 (807-2720)	C|T|protein_coding|synonymous_variant|LOW|567C>T|Asn189Asn
NC_045512.2	833	nsp2 (807-2720)	T|C|protein_coding|missense_variant|MODERATE|568T>C|Phe190Leu
NC_045512.2	834	nsp2 (807-2720)	T|G|protein_coding|missense_variant|MODERATE|569T>G|Phe190Cys
NC_045512.2	835	nsp2 (807-2720)	C|T|protein_coding|synonymous_variant|LOW|570C>T|Phe190Phe
NC_045512.2	837	nsp2 (807-2720)	G|T|protein_coding|missense_variant|MODERATE|572G>T|Cys191Phe
NC_045512.2	838	nsp2 (807-2720)	T|C|protein_coding|synonymous_variant|LOW|573T>C|Cys191Cys
NC_045512.2	839	nsp2 (807-2720)	G|A|protein_coding|missense_variant|MODERATE|574G>A|Gly192Ser
NC_045512.2	840	nsp2 (807-2720)	G|A|protein_coding|missense_variant|MODERATE|575G>A|Gly192Asp
NC_045512.2	841	nsp2 (807-2720)	C|T|protein_coding|synonymous_variant|LOW|576C>T|Gly192Gly
NC_045512.2	842	nsp2 (807-2720)	C|T|protein_coding|missense_variant|MODERATE|577C>T|Pro193Ser
NC_045512.2	843	nsp2 (807-2720)	C|T|protein_coding|missense_variant|MODERATE|578C>T|Pro193Leu
NC_045512.2	844	nsp2 (807-2720)	T|G|protein_coding|synonymous_variant|LOW|579T>G|Pro193Pro
NC_045512.2	845	nsp2 (807-2720)	G|T|protein_coding|missense_variant|MODERATE|580G>T|Asp194Tyr
NC_045512.2	847	nsp2 (807-2720)	T|G|protein_coding|missense_variant|MODERATE|582T>G|Asp194Glu
NC_045512.2	848	nsp2 (807-2720)	G|T|protein_coding|missense_variant|MODERATE|583G>T|Gly195Cys
NC_045512.2	850	nsp2 (807-2720)	C|T|protein_coding|synonymous_variant|LOW|585C>T|Gly195Gly
NC_045512.2	851	nsp2 (807-2720)	T|A|protein_coding|missense_variant|MODERATE|586T>A|Tyr196Asn
NC_045512.2	854	nsp2 (807-2720)	C|T|protein_coding|missense_variant|MODERATE|589C>T|Pro197Ser
NC_045512.2	855	nsp2 (807-2720)	C|T|protein_coding|missense_variant|MODERATE|590C>T|Pro197Leu
NC_045512.2	856	nsp2 (807-2720)	T|C|protein_coding|synonymous_variant|LOW|591T>C|Pro197Pro
NC_045512.2	857	nsp2 (807-2720)	C|T|protein_coding|missense_variant|MODERATE|592C>T|Leu198Phe
NC_045512.2	860	nsp2 (807-2720)	G|A|protein_coding|missense_variant|MODERATE|595G>A|Glu199Lys
NC_045512.2	861	nsp2 (807-2720)	A|T|protein_coding|missense_variant|MODERATE|596A>T|Glu199Val
NC_045512.2	862	nsp2 (807-2720)	G|T|protein_coding|missense_variant|MODERATE|597G>T|Glu199Asp
NC_045512.2	865	nsp2 (807-2720)	C|T|protein_coding|synonymous_variant|LOW|600C>T|Cys200Cys
NC_045512.2	867	nsp2 (807-2720)	T|C|protein_coding|missense_variant|MODERATE|602T>C|Ile201Thr
NC_045512.2	871	nsp2 (807-2720)	A|G|protein_coding|synonymous_variant|LOW|606A>G|Lys202Lys
NC_045512.2	872	nsp2 (807-2720)	G|T|protein_coding|missense_variant|MODERATE|607G>T|Asp203Tyr
NC_045512.2	873	nsp2 (807-2720)	A|G|protein_coding|missense_variant|MODERATE|608A>G|Asp203Gly
NC_045512.2	874	nsp2 (807-2720)	C|T|protein_coding|synonymous_variant|LOW|609C>T|Asp203Asp
NC_045512.2	875	nsp2 (807-2720)	C|T|protein_coding|missense_variant|MODERATE|610C>T|Leu204Phe
NC_045512.2	878	nsp2 (807-2720)	C|T|protein_coding|synonymous_variant|LOW|613C>T|Leu205Leu
NC_045512.2	881	nsp2 (807-2720)	G|A|protein_coding|missense_variant|MODERATE|616G>A|Ala206Thr
NC_045512.2	882	nsp2 (807-2720)	C|A|protein_coding|missense_variant|MODERATE|617C>A|Ala206Glu
NC_045512.2	883	nsp2 (807-2720)	A|C|protein_coding|synonymous_variant|LOW|618A>C|Ala206Ala
NC_045512.2	884	nsp2 (807-2720)	C|T|protein_coding|missense_variant|MODERATE|619C>T|Arg207Cys
NC_045512.2	885	nsp2 (807-2720)	G|T|protein_coding|missense_variant|MODERATE|620G>T|Arg207Leu
NC_045512.2	886	nsp2 (807-2720)	T|C|protein_coding|synonymous_variant|LOW|621T>C|Arg207Arg
NC_045512.2	889	nsp2 (807-2720)	T|C|protein_coding|synonymous_variant|LOW|624T>C|Ala208Ala
NC_045512.2	892	nsp2 (807-2720)	T|C|protein_coding|synonymous_variant|LOW|627T>C|Gly209Gly
NC_045512.2	895	nsp2 (807-2720)	A|G|protein_coding|synonymous_variant|LOW|630A>G|Lys210Lys
NC_045512.2	897	nsp2 (807-2720)	C|T|protein_coding|missense_variant|MODERATE|632C>T|Ala211Val
NC_045512.2	898	nsp2 (807-2720)	T|C|protein_coding|synonymous_variant|LOW|633T>C|Ala211Ala
NC_045512.2	900	nsp2 (807-2720)	C|T|protein_coding|missense_variant|MODERATE|635C>T|Ser212Leu
NC_045512.2	901	nsp2 (807-2720)	A|T|protein_coding|synonymous_variant|LOW|636A>T|Ser212Ser
NC_045512.2	903	nsp2 (807-2720)	G|T|protein_coding|missense_variant|MODERATE|638G>T|Cys213Phe
NC_045512.2	904	nsp2 (807-2720)	C|T|protein_coding|synonymous_variant|LOW|639C>T|Cys213Cys
NC_045512.2	905	nsp2 (807-2720)	A|G|protein_coding|missense_variant|MODERATE|640A>G|Thr214Ala
NC_045512.2	906	nsp2 (807-2720)	C|T|protein_coding|missense_variant|MODERATE|641C>T|Thr214Ile
NC_045512.2	907	nsp2 (807-2720)	T|G|protein_coding|synonymous_variant|LOW|642T>G|Thr214Thr
NC_045512.2	910	nsp2 (807-2720)	G|T|protein_coding|missense_variant|MODERATE|645G>T|Leu215Phe
NC_045512.2	911	nsp2 (807-2720)	T|C|protein_coding|missense_variant|MODERATE|646T>C|Ser216Pro
NC_045512.2	912	nsp2 (807-2720)	C|T|protein_coding|missense_variant|MODERATE|647C>T|Ser216Phe
NC_045512.2	913	nsp2 (807-2720)	C|T|protein_coding|synonymous_variant|LOW|648C>T|Ser216Ser
NC_045512.2	914	nsp2 (807-2720)	G|A|protein_coding|missense_variant|MODERATE|649G>A|Glu217Lys
NC_045512.2	915	nsp2 (807-2720)	A|G|protein_coding|missense_variant|MODERATE|650A>G|Glu217Gly
NC_045512.2	916	nsp2 (807-2720)	A|G|protein_coding|synonymous_variant|LOW|651A>G|Glu217Glu
NC_045512.2	920	nsp2 (807-2720)	C|T|protein_coding|synonymous_variant|LOW|655C>T|Leu219Leu
NC_045512.2	921	nsp2 (807-2720)	T|A|protein_coding|missense_variant|MODERATE|656T>A|Leu219Gln
NC_045512.2	922	nsp2 (807-2720)	G|A|protein_coding|synonymous_variant|LOW|657G>A|Leu219Leu
NC_045512.2	923	nsp2 (807-2720)	G|T|protein_coding|missense_variant|MODERATE|658G>T|Asp220Tyr
NC_045512.2	925	nsp2 (807-2720)	C|T|protein_coding|synonymous_variant|LOW|660C>T|Asp220Asp
NC_045512.2	926	nsp2 (807-2720)	T|G|protein_coding|missense_variant|MODERATE|661T>G|Phe221Val
NC_045512.2	927	nsp2 (807-2720)	T|A|protein_coding|missense_variant|MODERATE|662T>A|Phe221Tyr
NC_045512.2	929	nsp2 (807-2720)	A|G|protein_coding|missense_variant|MODERATE|664A>G|Ile222Val
NC_045512.2	931	nsp2 (807-2720)	T|C|protein_coding|synonymous_variant|LOW|666T>C|Ile222Ile
NC_045512.2	932	nsp2 (807-2720)	G|T|protein_coding|missense_variant|MODERATE|667G>T|Asp223Tyr
NC_045512.2	934	nsp2 (807-2720)	C|T|protein_coding|synonymous_variant|LOW|669C>T|Asp223Asp
NC_045512.2	936	nsp2 (807-2720)	C|T|protein_coding|missense_variant|MODERATE|671C>T|Thr224Ile
NC_045512.2	937	nsp2 (807-2720)	T|C|protein_coding|synonymous_variant|LOW|672T>C|Thr224Thr
NC_045512.2	939	nsp2 (807-2720)	A|G|protein_coding|missense_variant|MODERATE|674A>G|Lys225Arg
NC_045512.2	940	nsp2 (807-2720)	G|A|protein_coding|synonymous_variant|LOW|675G>A|Lys225Lys
NC_045512.2	941	nsp2 (807-2720)	A|G|protein_coding|missense_variant|MODERATE|676A>G|Arg226Gly
NC_045512.2	942	nsp2 (807-2720)	G|A|protein_coding|missense_variant|MODERATE|677G>A|Arg226Lys
NC_045512.2	943	nsp2 (807-2720)	G|A|protein_coding|synonymous_variant|LOW|678G>A|Arg226Arg
NC_045512.2	944	nsp2 (807-2720)	G|A|protein_coding|missense_variant|MODERATE|679G>A|Gly227Ser
NC_045512.2	945	nsp2 (807-2720)	G|T|protein_coding|missense_variant|MODERATE|680G>T|Gly227Val
NC_045512.2	946	nsp2 (807-2720)	T|A|protein_coding|synonymous_variant|LOW|681T>A|Gly227Gly
NC_045512.2	949	nsp2 (807-2720)	A|G|protein_coding|synonymous_variant|LOW|684A>G|Val228Val
NC_045512.2	950	nsp2 (807-2720)	T|C|protein_coding|missense_variant|MODERATE|685T>C|Tyr229His
NC_045512.2	951	nsp2 (807-2720)	A|G|protein_coding|missense_variant|MODERATE|686A>G|Tyr229Cys
NC_045512.2	952	nsp2 (807-2720)	C|T|protein_coding|synonymous_variant|LOW|687C>T|Tyr229Tyr
NC_045512.2	953	nsp2 (807-2720)	T|C|protein_coding|missense_variant|MODERATE|688T>C|Cys230Arg
NC_045512.2	955	nsp2 (807-2720)	C|T|protein_coding|synonymous_variant|LOW|690C>T|Cys230Cys
NC_045512.2	956	nsp2 (807-2720)	T|A|protein_coding|missense_variant|MODERATE|691T>A|Cys231Ser
NC_045512.2	957	nsp2 (807-2720)	G|A|protein_coding|missense_variant|MODERATE|692G>A|Cys231Tyr
NC_045512.2	958	nsp2 (807-2720)	C|T|protein_coding|synonymous_variant|LOW|693C>T|Cys231Cys
NC_045512.2	959	nsp2 (807-2720)	C|T|protein_coding|missense_variant|MODERATE|694C>T|Arg232Cys
NC_045512.2	960	nsp2 (807-2720)	G|A|protein_coding|missense_variant|MODERATE|695G>A|Arg232His
NC_045512.2	963	nsp2 (807-2720)	A|G|protein_coding|missense_variant|MODERATE|698A>G|Glu233Gly
NC_045512.2	964	nsp2 (807-2720)	A|G|protein_coding|synonymous_variant|LOW|699A>G|Glu233Glu
NC_045512.2	965	nsp2 (807-2720)	C|T|protein_coding|missense_variant|MODERATE|700C>T|His234Tyr
NC_045512.2	967	nsp2 (807-2720)	T|C|protein_coding|synonymous_variant|LOW|702T>C|His234His
NC_045512.2	968	nsp2 (807-2720)	G|A|protein_coding|missense_variant|MODERATE|703G>A|Glu235Lys
NC_045512.2	969	nsp2 (807-2720)	A|G|protein_coding|missense_variant|MODERATE|704A>G|Glu235Gly
NC_045512.2	970	nsp2 (807-2720)	G|A|protein_coding|synonymous_variant|LOW|705G>A|Glu235Glu
NC_045512.2	973	nsp2 (807-2720)	T|C|protein_coding|synonymous_variant|LOW|708T>C|His236His
NC_045512.2	975	nsp2 (807-2720)	A|C|protein_coding|missense_variant|MODERATE|710A>C|Glu237Ala
NC_045512.2	976	nsp2 (807-2720)	A|G|protein_coding|synonymous_variant|LOW|711A>G|Glu237Glu
NC_045512.2	978	nsp2 (807-2720)	T|C|protein_coding|missense_variant|MODERATE|713T>C|Ile238Thr
NC_045512.2	979	nsp2 (807-2720)	T|C|protein_coding|synonymous_variant|LOW|714T>C|Ile238Ile
NC_045512.2	980	nsp2 (807-2720)	G|T|protein_coding|missense_variant|MODERATE|715G>T|Ala239Ser
NC_045512.2	981	nsp2 (807-2720)	C|T|protein_coding|missense_variant|MODERATE|716C>T|Ala239Val
NC_045512.2	983	nsp2 (807-2720)	T|G|protein_coding|missense_variant|MODERATE|718T>G|Trp240Gly
NC_045512.2	986	nsp2 (807-2720)	T|C|protein_coding|missense_variant|MODERATE|721T>C|Tyr241His
NC_045512.2	987	nsp2 (807-2720)	A|G|protein_coding|missense_variant|MODERATE|722A>G|Tyr241Cys
NC_045512.2	988	nsp2 (807-2720)	C|T|protein_coding|synonymous_variant|LOW|723C>T|Tyr241Tyr
NC_045512.2	990	nsp2 (807-2720)	C|T|protein_coding|missense_variant|MODERATE|725C>T|Thr242Met
NC_045512.2	991	nsp2 (807-2720)	G|A|protein_coding|synonymous_variant|LOW|726G>A|Thr242Thr
NC_045512.2	994	nsp2 (807-2720)	A|G|protein_coding|synonymous_variant|LOW|729A>G|Glu243Glu
NC_045512.2	995	nsp2 (807-2720)	C|T|protein_coding|missense_variant|MODERATE|730C>T|Arg244Cys
NC_045512.2	998	nsp2 (807-2720)	T|G|protein_coding|missense_variant|MODERATE|733T>G|Ser245Ala
NC_045512.2	999	nsp2 (807-2720)	C|T|protein_coding|missense_variant|MODERATE|734C>T|Ser245Phe
NC_045512.2	1000	nsp2 (807-2720)	T|A|protein_coding|synonymous_variant|LOW|735T>A|Ser245Ser
NC_045512.2	1001	nsp2 (807-2720)	G|A|protein_coding|missense_variant|MODERATE|736G>A|Glu246Lys
NC_045512.2	1002	nsp2 (807-2720)	A|G|protein_coding|missense_variant|MODERATE|737A>G|Glu246Gly
NC_045512.2	1005	nsp2 (807-2720)	A|G|protein_coding|missense_variant|MODERATE|740A>G|Lys247Arg
NC_045512.2	1007	nsp2 (807-2720)	A|C|protein_coding|missense_variant|MODERATE|742A>C|Ser248Arg
NC_045512.2	1009	nsp2 (807-2720)	C|T|protein_coding|synonymous_variant|LOW|744C>T|Ser248Ser
NC_045512.2	1014	nsp2 (807-2720)	A|G|protein_coding|missense_variant|MODERATE|749A>G|Glu250Gly
NC_045512.2	1015	nsp2 (807-2720)	A|G|protein_coding|synonymous_variant|LOW|750A>G|Glu250Glu
NC_045512.2	1017	nsp2 (807-2720)	T|C|protein_coding|missense_variant|MODERATE|752T>C|Leu251Ser
NC_045512.2	1018	nsp2 (807-2720)	G|A|protein_coding|synonymous_variant|LOW|753G>A|Leu251Leu
NC_045512.2	1021	nsp2 (807-2720)	G|A|protein_coding|synonymous_variant|LOW|756G>A|Gln252Gln
NC_045512.2	1022	nsp2 (807-2720)	A|G|protein_coding|missense_variant|MODERATE|757A>G|Thr253Ala
NC_045512.2	1023	nsp2 (807-2720)	C|T|protein_coding|missense_variant|MODERATE|758C>T|Thr253Ile
NC_045512.2	1025	nsp2 (807-2720)	C|T|protein_coding|missense_variant|MODERATE|760C>T|Pro254Ser
NC_045512.2	1027	nsp2 (807-2720)	T|C|protein_coding|synonymous_variant|LOW|762T>C|Pro254Pro
NC_045512.2	1028	nsp2 (807-2720)	T|C|protein_coding|missense_variant|MODERATE|763T>C|Phe255Leu
NC_045512.2	1030	nsp2 (807-2720)	T|C|protein_coding|synonymous_variant|LOW|765T>C|Phe255Phe
NC_045512.2	1034	nsp2 (807-2720)	A|G|protein_coding|missense_variant|MODERATE|769A>G|Ile257Val
NC_045512.2	1036	nsp2 (807-2720)	T|C|protein_coding|synonymous_variant|LOW|771T>C|Ile257Ile
NC_045512.2	1042	nsp2 (807-2720)	G|A|protein_coding|synonymous_variant|LOW|777G>A|Leu259Leu
NC_045512.2	1043	nsp2 (807-2720)	G|T|protein_coding|missense_variant|MODERATE|778G>T|Ala260Ser
NC_045512.2	1044	nsp2 (807-2720)	C|T|protein_coding|missense_variant|MODERATE|779C>T|Ala260Val
NC_045512.2	1045	nsp2 (807-2720)	A|G|protein_coding|synonymous_variant|LOW|780A>G|Ala260Ala
NC_045512.2	1048	nsp2 (807-2720)	G|A|protein_coding|synonymous_variant|LOW|783G>A|Lys261Lys
NC_045512.2	1056	nsp2 (807-2720)	A|C|protein_coding|missense_variant|MODERATE|791A>C|Asp264Ala
NC_045512.2	1057	nsp2 (807-2720)	C|T|protein_coding|synonymous_variant|LOW|792C>T|Asp264Asp
NC_045512.2	1059	nsp2 (807-2720)	C|T|protein_coding|missense_variant|MODERATE|794C>T|Thr265Ile
NC_045512.2	1060	nsp2 (807-2720)	C|A|protein_coding|synonymous_variant|LOW|795C>A|Thr265Thr
NC_045512.2	1063	nsp2 (807-2720)	C|T|protein_coding|synonymous_variant|LOW|798C>T|Phe266Phe
NC_045512.2	1066	nsp2 (807-2720)	T|C|protein_coding|synonymous_variant|LOW|801T>C|Asn267Asn
NC_045512.2	1067	nsp2 (807-2720)	G|A|protein_coding|missense_variant|MODERATE|802G>A|Gly268Arg
NC_045512.2	1068	nsp2 (807-2720)	G|A|protein_coding|missense_variant|MODERATE|803G>A|Gly268Glu
NC_045512.2	1069	nsp2 (807-2720)	G|A|protein_coding|synonymous_variant|LOW|804G>A|Gly268Gly
NC_045512.2	1072	nsp2 (807-2720)	A|G|protein_coding|synonymous_variant|LOW|807A>G|Glu269Glu
NC_045512.2	1074	nsp2 (807-2720)	G|T|protein_coding|missense_variant|MODERATE|809G>T|Cys270Phe
NC_045512.2	1076	nsp2 (807-2720)	C|T|protein_coding|missense_variant|MODERATE|811C>T|Pro271Ser
NC_045512.2	1077	nsp2 (807-2720)	C|T|protein_coding|missense_variant|MODERATE|812C>T|Pro271Leu
NC_045512.2	1079	nsp2 (807-2720)	A|C|protein_coding|missense_variant|MODERATE|814A>C|Asn272His
NC_045512.2	1080	nsp2 (807-2720)	A|G|protein_coding|missense_variant|MODERATE|815A>G|Asn272Ser
NC_045512.2	1085	nsp2 (807-2720)	G|T|protein_coding|missense_variant|MODERATE|820G>T|Val274Leu
NC_045512.2	1087	nsp2 (807-2720)	A|G|protein_coding|synonymous_variant|LOW|822A>G|Val274Val
NC_045512.2	1090	nsp2 (807-2720)	T|C|protein_coding|synonymous_variant|LOW|825T>C|Phe275Phe
NC_045512.2	1091	nsp2 (807-2720)	C|T|protein_coding|missense_variant|MODERATE|826C>T|Pro276Ser
NC_045512.2	1093	nsp2 (807-2720)	C|T|protein_coding|synonymous_variant|LOW|828C>T|Pro276Pro
NC_045512.2	1094	nsp2 (807-2720)	T|C|protein_coding|synonymous_variant|LOW|829T>C|Leu277Leu
NC_045512.2	1096	nsp2 (807-2720)	A|G|protein_coding|synonymous_variant|LOW|831A>G|Leu277Leu
NC_045512.2	1097	nsp2 (807-2720)	A|G|protein_coding|missense_variant|MODERATE|832A>G|Asn278Asp
NC_045512.2	1098	nsp2 (807-2720)	A|G|protein_coding|missense_variant|MODERATE|833A>G|Asn278Ser
NC_045512.2	1099	nsp2 (807-2720)	T|C|protein_coding|synonymous_variant|LOW|834T>C|Asn278Asn
NC_045512.2	1100	nsp2 (807-2720)	T|A|protein_coding|missense_variant|MODERATE|835T>A|Ser279Thr
NC_045512.2	1101	nsp2 (807-2720)	C|T|protein_coding|missense_variant|MODERATE|836C>T|Ser279Phe
NC_045512.2	1102	nsp2 (807-2720)	C|T|protein_coding|synonymous_variant|LOW|837C>T|Ser279Ser
NC_045512.2	1103	nsp2 (807-2720)	A|G|protein_coding|missense_variant|MODERATE|838A>G|Ile280Val
NC_045512.2	1104	nsp2 (807-2720)	T|A|protein_coding|missense_variant|MODERATE|839T>A|Ile280Lys
NC_045512.2	1105	nsp2 (807-2720)	A|G|protein_coding|missense_variant|MODERATE|840A>G|Ile280Met
NC_045512.2	1106	nsp2 (807-2720)	A|T|protein_coding|missense_variant|MODERATE|841A>T|Ile281Phe
NC_045512.2	1107	nsp2 (807-2720)	T|C|protein_coding|missense_variant|MODERATE|842T>C|Ile281Thr
NC_045512.2	1108	nsp2 (807-2720)	C|T|protein_coding|synonymous_variant|LOW|843C>T|Ile281Ile
NC_045512.2	1111	nsp2 (807-2720)	G|A|protein_coding|synonymous_variant|LOW|846G>A|Lys282Lys
NC_045512.2	1112	nsp2 (807-2720)	A|G|protein_coding|missense_variant|MODERATE|847A>G|Thr283Ala
NC_045512.2	1113	nsp2 (807-2720)	C|T|protein_coding|missense_variant|MODERATE|848C>T|Thr283Ile
NC_045512.2	1114	nsp2 (807-2720)	T|A|protein_coding|synonymous_variant|LOW|849T>A|Thr283Thr
NC_045512.2	1115	nsp2 (807-2720)	A|G|protein_coding|missense_variant|MODERATE|850A>G|Ile284Val
NC_045512.2	1116	nsp2 (807-2720)	T|G|protein_coding|missense_variant|MODERATE|851T>G|Ile284Ser
NC_045512.2	1117	nsp2 (807-2720)	T|C|protein_coding|synonymous_variant|LOW|852T>C|Ile284Ile
NC_045512.2	1119	nsp2 (807-2720)	A|C|protein_coding|missense_variant|MODERATE|854A>C|Gln285Pro
NC_045512.2	1121	nsp2 (807-2720)	C|T|protein_coding|missense_variant|MODERATE|856C>T|Pro286Ser
NC_045512.2	1123	nsp2 (807-2720)	A|G|protein_coding|synonymous_variant|LOW|858A>G|Pro286Pro
NC_045512.2	1124	nsp2 (807-2720)	A|G|protein_coding|missense_variant|MODERATE|859A>G|Arg287Gly
NC_045512.2	1125	nsp2 (807-2720)	G|A|protein_coding|missense_variant|MODERATE|860G>A|Arg287Lys
NC_045512.2	1126	nsp2 (807-2720)	G|T|protein_coding|missense_variant|MODERATE|861G>T|Arg287Ser
NC_045512.2	1127	nsp2 (807-2720)	G|T|protein_coding|missense_variant|MODERATE|862G>T|Val288Phe
NC_045512.2	1132	nsp2 (807-2720)	A|G|protein_coding|synonymous_variant|LOW|867A>G|Glu289Glu
NC_045512.2	1133	nsp2 (807-2720)	A|T|protein_coding|stop_gained|HIGH|868A>T|Lys290*
NC_045512.2	1134	nsp2 (807-2720)	A|C|protein_coding|missense_variant|MODERATE|869A>C|Lys290Thr
NC_045512.2	1135	nsp2 (807-2720)	G|T|protein_coding|missense_variant|MODERATE|870G>T|Lys290Asn
NC_045512.2	1136	nsp2 (807-2720)	A|G|protein_coding|missense_variant|MODERATE|871A>G|Lys291Glu
NC_045512.2	1139	nsp2 (807-2720)	A|G|protein_coding|missense_variant|MODERATE|874A>G|Lys292Glu
NC_045512.2	1140	nsp2 (807-2720)	A|C|protein_coding|missense_variant|MODERATE|875A>C|Lys292Thr
NC_045512.2	1141	nsp2 (807-2720)	G|T|protein_coding|missense_variant|MODERATE|876G>T|Lys292Asn
NC_045512.2	1142	nsp2 (807-2720)	C|T|protein_coding|missense_variant|MODERATE|877C>T|Leu293Phe
NC_045512.2	1145	nsp2 (807-2720)	G|A|protein_coding|missense_variant|MODERATE|880G>A|Asp294Asn
NC_045512.2	1146	nsp2 (807-2720)	A|G|protein_coding|missense_variant|MODERATE|881A>G|Asp294Gly
NC_045512.2	1148	nsp2 (807-2720)	G|T|protein_coding|missense_variant|MODERATE|883G>T|Gly295Cys
NC_045512.2	1149	nsp2 (807-2720)	G|A|protein_coding|missense_variant|MODERATE|884G>A|Gly295Asp
NC_045512.2	1150	nsp2 (807-2720)	C|T|protein_coding|synonymous_variant|LOW|885C>T|Gly295Gly
NC_045512.2	1154	nsp2 (807-2720)	A|G|protein_coding|missense_variant|MODERATE|889A>G|Met297Val
NC_045512.2	1155	nsp2 (807-2720)	T|C|protein_coding|missense_variant|MODERATE|890T>C|Met297Thr
NC_045512.2	1156	nsp2 (807-2720)	G|A|protein_coding|missense_variant|MODERATE|891G>A|Met297Ile
NC_045512.2	1157	nsp2 (807-2720)	G|T|protein_coding|missense_variant|MODERATE|892G>T|Gly298Cys
NC_045512.2	1158	nsp2 (807-2720)	G|A|protein_coding|missense_variant|MODERATE|893G>A|Gly298Asp
NC_045512.2	1161	nsp2 (807-2720)	G|A|protein_coding|missense_variant|MODERATE|896G>A|Arg299Lys
NC_045512.2	1162	nsp2 (807-2720)	A|G|protein_coding|synonymous_variant|LOW|897A>G|Arg299Arg
NC_045512.2	1163	nsp2 (807-2720)	A|T|protein_coding|missense_variant|MODERATE|898A>T|Ile300Phe
NC_045512.2	1165	nsp2 (807-2720)	T|C|protein_coding|synonymous_variant|LOW|900T>C|Ile300Ile
NC_045512.2	1166	nsp2 (807-2720)	C|A|protein_coding|synonymous_variant|LOW|901C>A|Arg301Arg
NC_045512.2	1167	nsp2 (807-2720)	G|A|protein_coding|missense_variant|MODERATE|902G>A|Arg301Gln
NC_045512.2	1168	nsp2 (807-2720)	A|G|protein_coding|synonymous_variant|LOW|903A>G|Arg301Arg
NC_045512.2	1169	nsp2 (807-2720)	T|C|protein_coding|missense_variant|MODERATE|904T>C|Ser302Pro
NC_045512.2	1170	nsp2 (807-2720)	C|T|protein_coding|missense_variant|MODERATE|905C>T|Ser302Phe
NC_045512.2	1172	nsp2 (807-2720)	G|T|protein_coding|missense_variant|MODERATE|907G>T|Val303Phe
NC_045512.2	1174	nsp2 (807-2720)	C|T|protein_coding|synonymous_variant|LOW|909C>T|Val303Val
NC_045512.2	1176	nsp2 (807-2720)	A|T|protein_coding|missense_variant|MODERATE|911A>T|Tyr304Phe
NC_045512.2	1177	nsp2 (807-2720)	T|C|protein_coding|synonymous_variant|LOW|912T>C|Tyr304Tyr
NC_045512.2	1178	nsp2 (807-2720)	C|T|protein_coding|missense_variant|MODERATE|913C>T|Pro305Ser
NC_045512.2	1179	nsp2 (807-2720)	C|T|protein_coding|missense_variant|MODERATE|914C>T|Pro305Leu
NC_045512.2	1180	nsp2 (807-2720)	A|T|protein_coding|synonymous_variant|LOW|915A>T|Pro305Pro
NC_045512.2	1181	nsp2 (807-2720)	G|T|protein_coding|missense_variant|MODERATE|916G>T|Val306Phe
NC_045512.2	1185	nsp2 (807-2720)	C|T|protein_coding|missense_variant|MODERATE|920C>T|Ala307Val
NC_045512.2	1186	nsp2 (807-2720)	G|A|protein_coding|synonymous_variant|LOW|921G>A|Ala307Ala
NC_045512.2	1187	nsp2 (807-2720)	T|C|protein_coding|missense_variant|MODERATE|922T>C|Ser308Pro
NC_045512.2	1188	nsp2 (807-2720)	C|T|protein_coding|missense_variant|MODERATE|923C>T|Ser308Leu
NC_045512.2	1189	nsp2 (807-2720)	A|G|protein_coding|synonymous_variant|LOW|924A>G|Ser308Ser
NC_045512.2	1190	nsp2 (807-2720)	C|G|protein_coding|missense_variant|MODERATE|925C>G|Pro309Ala
NC_045512.2	1191	nsp2 (807-2720)	C|A|protein_coding|missense_variant|MODERATE|926C>A|Pro309Gln
NC_045512.2	1193	nsp2 (807-2720)	A|G|protein_coding|missense_variant|MODERATE|928A>G|Asn310Asp
NC_045512.2	1195	nsp2 (807-2720)	T|C|protein_coding|synonymous_variant|LOW|930T>C|Asn310Asn
NC_045512.2	1201	nsp2 (807-2720)	C|T|protein_coding|synonymous_variant|LOW|936C>T|Cys312Cys
NC_045512.2	1202	nsp2 (807-2720)	A|G|protein_coding|missense_variant|MODERATE|937A>G|Asn313Asp
NC_045512.2	1203	nsp2 (807-2720)	A|G|protein_coding|missense_variant|MODERATE|938A>G|Asn313Ser
NC_045512.2	1204	nsp2 (807-2720)	C|T|protein_coding|synonymous_variant|LOW|939C>T|Asn313Asn
NC_045512.2	1207	nsp2 (807-2720)	A|G|protein_coding|synonymous_variant|LOW|942A>G|Gln314Gln
NC_045512.2	1208	nsp2 (807-2720)	A|G|protein_coding|missense_variant|MODERATE|943A>G|Met315Val
NC_045512.2	1209	nsp2 (807-2720)	T|C|protein_coding|missense_variant|MODERATE|944T>C|Met315Thr
NC_045512.2	1210	nsp2 (807-2720)	G|T|protein_coding|missense_variant|MODERATE|945G>T|Met315Ile
NC_045512.2	1211	nsp2 (807-2720)	T|G|protein_coding|missense_variant|MODERATE|946T>G|Cys316Gly
NC_045512.2	1212	nsp2 (807-2720)	G|C|protein_coding|missense_variant|MODERATE|947G>C|Cys316Ser
NC_045512.2	1213	nsp2 (807-2720)	C|T|protein_coding|synonymous_variant|LOW|948C>T|Cys316Cys
NC_045512.2	1214	nsp2 (807-2720)	C|T|protein_coding|missense_variant|MODERATE|949C>T|Leu317Phe
NC_045512.2	1215	nsp2 (807-2720)	T|C|protein_coding|missense_variant|MODERATE|950T>C|Leu317Pro
NC_045512.2	1216	nsp2 (807-2720)	T|C|protein_coding|synonymous_variant|LOW|951T>C|Leu317Leu
NC_045512.2	1218	nsp2 (807-2720)	C|T|protein_coding|missense_variant|MODERATE|953C>T|Ser318Leu
NC_045512.2	1221	nsp2 (807-2720)	C|T|protein_coding|missense_variant|MODERATE|956C>T|Thr319Ile
NC_045512.2	1222	nsp2 (807-2720)	T|C|protein_coding|synonymous_variant|LOW|957T>C|Thr319Thr
NC_045512.2	1223	nsp2 (807-2720)	C|T|protein_coding|missense_variant|MODERATE|958C>T|Leu320Phe
NC_045512.2	1225	nsp2 (807-2720)	C|T|protein_coding|synonymous_variant|LOW|960C>T|Leu320Leu
NC_045512.2	1226	nsp2 (807-2720)	A|C|protein_coding|missense_variant|MODERATE|961A>C|Met321Leu
NC_045512.2	1228	nsp2 (807-2720)	G|A|protein_coding|missense_variant|MODERATE|963G>A|Met321Ile
NC_045512.2	1230	nsp2 (807-2720)	A|G|protein_coding|missense_variant|MODERATE|965A>G|Lys322Arg
NC_045512.2	1234	nsp2 (807-2720)	T|C|protein_coding|synonymous_variant|LOW|969T>C|Cys323Cys
NC_045512.2	1237	nsp2 (807-2720)	T|C|protein_coding|synonymous_variant|LOW|972T>C|Asp324Asp
NC_045512.2	1238	nsp2 (807-2720)	C|T|protein_coding|missense_variant|MODERATE|973C>T|His325Tyr
NC_045512.2	1239	nsp2 (807-2720)	A|G|protein_coding|missense_variant|MODERATE|974A>G|His325Arg
NC_045512.2	1243	nsp2 (807-2720)	T|C|protein_coding|synonymous_variant|LOW|978T>C|Cys326Cys
NC_045512.2	1244	nsp2 (807-2720)	G|A|protein_coding|missense_variant|MODERATE|979G>A|Gly327Ser
NC_045512.2	1245	nsp2 (807-2720)	G|A|protein_coding|missense_variant|MODERATE|980G>A|Gly327Asp
NC_045512.2	1251	nsp2 (807-2720)	C|T|protein_coding|missense_variant|MODERATE|986C>T|Thr329Ile
NC_045512.2	1252	nsp2 (807-2720)	T|G|protein_coding|synonymous_variant|LOW|987T>G|Thr329Thr
NC_045512.2	1254	nsp2 (807-2720)	C|T|protein_coding|missense_variant|MODERATE|989C>T|Ser330Leu
NC_045512.2	1255	nsp2 (807-2720)	A|G|protein_coding|synonymous_variant|LOW|990A>G|Ser330Ser
NC_045512.2	1260	nsp2 (807-2720)	A|T|protein_coding|missense_variant|MODERATE|995A>T|Gln332Leu
NC_045512.2	1261	nsp2 (807-2720)	G|A|protein_coding|synonymous_variant|LOW|996G>A|Gln332Gln
NC_045512.2	1262	nsp2 (807-2720)	A|G|protein_coding|missense_variant|MODERATE|997A>G|Thr333Ala
NC_045512.2	1263	nsp2 (807-2720)	C|T|protein_coding|missense_variant|MODERATE|998C>T|Thr333Met
NC_045512.2	1264	nsp2 (807-2720)	G|T|protein_coding|synonymous_variant|LOW|999G>T|Thr333Thr
NC_045512.2	1265	nsp2 (807-2720)	G|T|protein_coding|missense_variant|MODERATE|1000G>T|Gly334Cys
NC_045512.2	1267	nsp2 (807-2720)	C|T|protein_coding|synonymous_variant|LOW|1002C>T|Gly334Gly
NC_045512.2	1268	nsp2 (807-2720)	G|A|protein_coding|missense_variant|MODERATE|1003G>A|Asp335Asn
NC_045512.2	1269	nsp2 (807-2720)	A|G|protein_coding|missense_variant|MODERATE|1004A>G|Asp335Gly
NC_045512.2	1270	nsp2 (807-2720)	T|C|protein_coding|synonymous_variant|LOW|1005T>C|Asp335Asp
NC_045512.2	1274	nsp2 (807-2720)	G|T|protein_coding|missense_variant|MODERATE|1009G>T|Val337Phe
NC_045512.2	1278	nsp2 (807-2720)	A|G|protein_coding|missense_variant|MODERATE|1013A>G|Lys338Arg
NC_045512.2	1281	nsp2 (807-2720)	C|T|protein_coding|missense_variant|MODERATE|1016C>T|Ala339Val
NC_045512.2	1282	nsp2 (807-2720)	C|T|protein_coding|synonymous_variant|LOW|1017C>T|Ala339Ala
NC_045512.2	1283	nsp2 (807-2720)	A|G|protein_coding|missense_variant|MODERATE|1018A>G|Thr340Ala
NC_045512.2	1284	nsp2 (807-2720)	C|T|protein_coding|missense_variant|MODERATE|1019C>T|Thr340Ile
NC_045512.2	1285	nsp2 (807-2720)	T|C|protein_coding|synonymous_variant|LOW|1020T>C|Thr340Thr
NC_045512.2	1288	nsp2 (807-2720)	C|T|protein_coding|synonymous_variant|LOW|1023C>T|Cys341Cys
NC_045512.2	1294	nsp2 (807-2720)	T|C|protein_coding|synonymous_variant|LOW|1029T>C|Phe343Phe
NC_045512.2	1296	nsp2 (807-2720)	G|T|protein_coding|missense_variant|MODERATE|1031G>T|Cys344Phe
NC_045512.2	1298	nsp2 (807-2720)	G|A|protein_coding|missense_variant|MODERATE|1033G>A|Gly345Ser
NC_045512.2	1299	nsp2 (807-2720)	G|T|protein_coding|missense_variant|MODERATE|1034G>T|Gly345Val
NC_045512.2	1300	nsp2 (807-2720)	C|T|protein_coding|synonymous_variant|LOW|1035C>T|Gly345Gly
NC_045512.2	1302	nsp2 (807-2720)	C|T|protein_coding|missense_variant|MODERATE|1037C>T|Thr346Ile
NC_045512.2	1303	nsp2 (807-2720)	T|C|protein_coding|synonymous_variant|LOW|1038T>C|Thr346Thr
NC_045512.2	1305	nsp2 (807-2720)	A|G|protein_coding|missense_variant|MODERATE|1040A>G|Glu347Gly
NC_045512.2	1306	nsp2 (807-2720)	G|T|protein_coding|missense_variant|MODERATE|1041G>T|Glu347Asp
NC_045512.2	1308	nsp2 (807-2720)	A|G|protein_coding|missense_variant|MODERATE|1043A>G|Asn348Ser
NC_045512.2	1311	nsp2 (807-2720)	T|C|protein_coding|missense_variant|MODERATE|1046T>C|Leu349Ser
NC_045512.2	1312	nsp2 (807-2720)	G|T|protein_coding|missense_variant|MODERATE|1047G>T|Leu349Phe
NC_045512.2	1313	nsp2 (807-2720)	A|G|protein_coding|missense_variant|MODERATE|1048A>G|Thr350Ala
NC_045512.2	1314	nsp2 (807-2720)	C|T|protein_coding|missense_variant|MODERATE|1049C>T|Thr350Ile
NC_045512.2	1317	nsp2 (807-2720)	A|G|protein_coding|missense_variant|MODERATE|1052A>G|Lys351Arg
NC_045512.2	1319	nsp2 (807-2720)	G|A|protein_coding|missense_variant|MODERATE|1054G>A|Glu352Lys
NC_045512.2	1320	nsp2 (807-2720)	A|C|protein_coding|missense_variant|MODERATE|1055A>C|Glu352Ala
NC_045512.2	1321	nsp2 (807-2720)	A|C|protein_coding|missense_variant|MODERATE|1056A>C|Glu352Asp
NC_045512.2	1322	nsp2 (807-2720)	G|T|protein_coding|missense_variant|MODERATE|1057G>T|Gly353Cys
NC_045512.2	1323	nsp2 (807-2720)	G|T|protein_coding|missense_variant|MODERATE|1058G>T|Gly353Val
NC_045512.2	1325	nsp2 (807-2720)	G|A|protein_coding|missense_variant|MODERATE|1060G>A|Ala354Thr
NC_045512.2	1326	nsp2 (807-2720)	C|T|protein_coding|missense_variant|MODERATE|1061C>T|Ala354Val
NC_045512.2	1329	nsp2 (807-2720)	C|T|protein_coding|missense_variant|MODERATE|1064C>T|Thr355Ile
NC_045512.2	1331	nsp2 (807-2720)	A|G|protein_coding|missense_variant|MODERATE|1066A>G|Thr356Ala
NC_045512.2	1333	nsp2 (807-2720)	T|C|protein_coding|synonymous_variant|LOW|1068T>C|Thr356Thr
NC_045512.2	1334	nsp2 (807-2720)	T|A|protein_coding|missense_variant|MODERATE|1069T>A|Cys357Ser
NC_045512.2	1339	nsp2 (807-2720)	T|C|protein_coding|synonymous_variant|LOW|1074T>C|Gly358Gly
NC_045512.2	1340	nsp2 (807-2720)	T|C|protein_coding|missense_variant|MODERATE|1075T>C|Tyr359His
NC_045512.2	1342	nsp2 (807-2720)	C|T|protein_coding|synonymous_variant|LOW|1077C>T|Tyr359Tyr
NC_045512.2	1344	nsp2 (807-2720)	T|C|protein_coding|missense_variant|MODERATE|1079T>C|Leu360Ser
NC_045512.2	1346	nsp2 (807-2720)	C|T|protein_coding|missense_variant|MODERATE|1081C>T|Pro361Ser
NC_045512.2	1347	nsp2 (807-2720)	C|T|protein_coding|missense_variant|MODERATE|1082C>T|Pro361Leu
NC_045512.2	1348	nsp2 (807-2720)	C|T|protein_coding|synonymous_variant|LOW|1083C>T|Pro361Pro
NC_045512.2	1349	nsp2 (807-2720)	C|A|protein_coding|missense_variant|MODERATE|1084C>A|Gln362Lys
NC_045512.2	1350	nsp2 (807-2720)	A|T|protein_coding|missense_variant|MODERATE|1085A>T|Gln362Leu
NC_045512.2	1351	nsp2 (807-2720)	A|G|protein_coding|synonymous_variant|LOW|1086A>G|Gln362Gln
NC_045512.2	1355	nsp2 (807-2720)	G|T|protein_coding|missense_variant|MODERATE|1090G>T|Ala364Ser
NC_045512.2	1357	nsp2 (807-2720)	T|G|protein_coding|synonymous_variant|LOW|1092T>G|Ala364Ala
NC_045512.2	1358	nsp2 (807-2720)	G|T|protein_coding|missense_variant|MODERATE|1093G>T|Val365Phe
NC_045512.2	1359	nsp2 (807-2720)	T|C|protein_coding|missense_variant|MODERATE|1094T>C|Val365Ala
NC_045512.2	1360	nsp2 (807-2720)	T|C|protein_coding|synonymous_variant|LOW|1095T>C|Val365Val
NC_045512.2	1365	nsp2 (807-2720)	A|C|protein_coding|missense_variant|MODERATE|1100A>C|Lys367Thr
NC_045512.2	1367	nsp2 (807-2720)	A|C|protein_coding|missense_variant|MODERATE|1102A>C|Ile368Leu
NC_045512.2	1368	nsp2 (807-2720)	T|C|protein_coding|missense_variant|MODERATE|1103T>C|Ile368Thr
NC_045512.2	1372	nsp2 (807-2720)	T|C|protein_coding|synonymous_variant|LOW|1107T>C|Tyr369Tyr
NC_045512.2	1376	nsp2 (807-2720)	C|T|protein_coding|missense_variant|MODERATE|1111C>T|Pro371Ser
NC_045512.2	1377	nsp2 (807-2720)	C|T|protein_coding|missense_variant|MODERATE|1112C>T|Pro371Leu
NC_045512.2	1378	nsp2 (807-2720)	A|C|protein_coding|synonymous_variant|LOW|1113A>C|Pro371Pro
NC_045512.2	1381	nsp2 (807-2720)	A|G|protein_coding|synonymous_variant|LOW|1116A>G|Ala372Ala
NC_045512.2	1384	nsp2 (807-2720)	T|C|protein_coding|synonymous_variant|LOW|1119T>C|Cys373Cys
NC_045512.2	1385	nsp2 (807-2720)	C|T|protein_coding|missense_variant|MODERATE|1120C>T|His374Tyr
NC_045512.2	1386	nsp2 (807-2720)	A|G|protein_coding|missense_variant|MODERATE|1121A>G|His374Arg
NC_045512.2	1387	nsp2 (807-2720)	C|T|protein_coding|synonymous_variant|LOW|1122C>T|His374His
NC_045512.2	1389	nsp2 (807-2720)	A|G|protein_coding|missense_variant|MODERATE|1124A>G|Asn375Ser
NC_045512.2	1391	nsp2 (807-2720)	T|G|protein_coding|missense_variant|MODERATE|1126T>G|Ser376Ala
NC_045512.2	1392	nsp2 (807-2720)	C|T|protein_coding|missense_variant|MODERATE|1127C>T|Ser376Leu
NC_045512.2	1394	nsp2 (807-2720)	G|A|protein_coding|missense_variant|MODERATE|1129G>A|Glu377Lys
NC_045512.2	1395	nsp2 (807-2720)	A|C|protein_coding|missense_variant|MODERATE|1130A>C|Glu377Ala
NC_045512.2	1396	nsp2 (807-2720)	A|G|protein_coding|synonymous_variant|LOW|1131A>G|Glu377Glu
NC_045512.2	1397	nsp2 (807-2720)	G|A|protein_coding|missense_variant|MODERATE|1132G>A|Val378Ile
NC_045512.2	1399	nsp2 (807-2720)	A|G|protein_coding|synonymous_variant|LOW|1134A>G|Val378Val
NC_045512.2	1400	nsp2 (807-2720)	G|A|protein_coding|missense_variant|MODERATE|1135G>A|Gly379Arg
NC_045512.2	1401	nsp2 (807-2720)	G|A|protein_coding|missense_variant|MODERATE|1136G>A|Gly379Glu
NC_045512.2	1403	nsp2 (807-2720)	C|T|protein_coding|missense_variant|MODERATE|1138C>T|Pro380Ser
NC_045512.2	1404	nsp2 (807-2720)	C|T|protein_coding|missense_variant|MODERATE|1139C>T|Pro380Leu
NC_045512.2	1405	nsp2 (807-2720)	T|C|protein_coding|synonymous_variant|LOW|1140T>C|Pro380Pro
NC_045512.2	1407	nsp2 (807-2720)	A|G|protein_coding|missense_variant|MODERATE|1142A>G|Glu381Gly
NC_045512.2	1408	nsp2 (807-2720)	G|A|protein_coding|synonymous_variant|LOW|1143G>A|Glu381Glu
NC_045512.2	1410	nsp2 (807-2720)	A|T|protein_coding|missense_variant|MODERATE|1145A>T|His382Leu
NC_045512.2	1412	nsp2 (807-2720)	A|G|protein_coding|missense_variant|MODERATE|1147A>G|Ser383Gly
NC_045512.2	1413	nsp2 (807-2720)	G|A|protein_coding|missense_variant|MODERATE|1148G>A|Ser383Asn
NC_045512.2	1414	nsp2 (807-2720)	T|C|protein_coding|synonymous_variant|LOW|1149T>C|Ser383Ser
NC_045512.2	1415	nsp2 (807-2720)	C|T|protein_coding|missense_variant|MODERATE|1150C>T|Leu384Phe
NC_045512.2	1416	nsp2 (807-2720)	T|C|protein_coding|missense_variant|MODERATE|1151T>C|Leu384Pro
NC_045512.2	1417	nsp2 (807-2720)	T|C|protein_coding|synonymous_variant|LOW|1152T>C|Leu384Leu
NC_045512.2	1419	nsp2 (807-2720)	C|T|protein_coding|missense_variant|MODERATE|1154C>T|Ala385Val
NC_045512.2	1420	nsp2 (807-2720)	C|T|protein_coding|synonymous_variant|LOW|1155C>T|Ala385Ala
NC_045512.2	1421	nsp2 (807-2720)	G|A|protein_coding|missense_variant|MODERATE|1156G>A|Glu386Lys
NC_045512.2	1422	nsp2 (807-2720)	A|G|protein_coding|missense_variant|MODERATE|1157A>G|Glu386Gly
NC_045512.2	1423	nsp2 (807-2720)	A|C|protein_coding|missense_variant|MODERATE|1158A>C|Glu386Asp
NC_045512.2	1426	nsp2 (807-2720)	C|T|protein_coding|synonymous_variant|LOW|1161C>T|Tyr387Tyr
NC_045512.2	1427	nsp2 (807-2720)	C|T|protein_coding|missense_variant|MODERATE|1162C>T|His388Tyr
NC_045512.2	1428	nsp2 (807-2720)	A|G|protein_coding|missense_variant|MODERATE|1163A>G|His388Arg
NC_045512.2	1430	nsp2 (807-2720)	A|G|protein_coding|missense_variant|MODERATE|1165A>G|Asn389Asp
NC_045512.2	1435	nsp2 (807-2720)	A|G|protein_coding|synonymous_variant|LOW|1170A>G|Glu390Glu
NC_045512.2	1437	nsp2 (807-2720)	C|T|protein_coding|missense_variant|MODERATE|1172C>T|Ser391Phe
NC_045512.2	1438	nsp2 (807-2720)	T|A|protein_coding|synonymous_variant|LOW|1173T>A|Ser391Ser
NC_045512.2	1439	nsp2 (807-2720)	G|T|protein_coding|missense_variant|MODERATE|1174G>T|Gly392Cys
NC_045512.2	1440	nsp2 (807-2720)	G|A|protein_coding|missense_variant|MODERATE|1175G>A|Gly392Asp
NC_045512.2	1441	nsp2 (807-2720)	C|T|protein_coding|synonymous_variant|LOW|1176C>T|Gly392Gly
NC_045512.2	1444	nsp2 (807-2720)	G|A|protein_coding|synonymous_variant|LOW|1179G>A|Leu393Leu
NC_045512.2	1445	nsp2 (807-2720)	A|G|protein_coding|missense_variant|MODERATE|1180A>G|Lys394Glu
NC_045512.2	1449	nsp2 (807-2720)	C|T|protein_coding|missense_variant|MODERATE|1184C>T|Thr395Ile
NC_045512.2	1450	nsp2 (807-2720)	C|T|protein_coding|synonymous_variant|LOW|1185C>T|Thr395Thr
NC_045512.2	1452	nsp2 (807-2720)	T|C|protein_coding|missense_variant|MODERATE|1187T>C|Ile396Thr
NC_045512.2	1454	nsp2 (807-2720)	C|T|protein_coding|missense_variant|MODERATE|1189C>T|Leu397Phe
NC_045512.2	1455	nsp2 (807-2720)	T|C|protein_coding|missense_variant|MODERATE|1190T>C|Leu397Pro
NC_045512.2	1457	nsp2 (807-2720)	C|T|protein_coding|missense_variant|MODERATE|1192C>T|Arg398Cys
NC_045512.2	1458	nsp2 (807-2720)	G|T|protein_coding|missense_variant|MODERATE|1193G>T|Arg398Leu
NC_045512.2	1461	nsp2 (807-2720)	A|G|protein_coding|missense_variant|MODERATE|1196A>G|Lys399Arg
NC_045512.2	1462	nsp2 (807-2720)	G|T|protein_coding|missense_variant|MODERATE|1197G>T|Lys399Asn
NC_045512.2	1463	nsp2 (807-2720)	G|A|protein_coding|missense_variant|MODERATE|1198G>A|Gly400Ser
NC_045512.2	1464	nsp2 (807-2720)	G|A|protein_coding|missense_variant|MODERATE|1199G>A|Gly400Asp
NC_045512.2	1465	nsp2 (807-2720)	T|C|protein_coding|synonymous_variant|LOW|1200T>C|Gly400Gly
NC_045512.2	1466	nsp2 (807-2720)	G|A|protein_coding|missense_variant|MODERATE|1201G>A|Gly401Ser
NC_045512.2	1467	nsp2 (807-2720)	G|A|protein_coding|missense_variant|MODERATE|1202G>A|Gly401Asp
NC_045512.2	1469	nsp2 (807-2720)	C|T|protein_coding|missense_variant|MODERATE|1204C>T|Arg402Cys
NC_045512.2	1470	nsp2 (807-2720)	G|A|protein_coding|missense_variant|MODERATE|1205G>A|Arg402His
NC_045512.2	1471	nsp2 (807-2720)	C|T|protein_coding|synonymous_variant|LOW|1206C>T|Arg402Arg
NC_045512.2	1473	nsp2 (807-2720)	C|T|protein_coding|missense_variant|MODERATE|1208C>T|Thr403Ile
NC_045512.2	1475	nsp2 (807-2720)	A|C|protein_coding|missense_variant|MODERATE|1210A>C|Ile404Leu
NC_045512.2	1476	nsp2 (807-2720)	T|G|protein_coding|missense_variant|MODERATE|1211T>G|Ile404Ser
NC_045512.2	1477	nsp2 (807-2720)	T|A|protein_coding|synonymous_variant|LOW|1212T>A|Ile404Ile
NC_045512.2	1478	nsp2 (807-2720)	G|A|protein_coding|missense_variant|MODERATE|1213G>A|Ala405Thr
NC_045512.2	1479	nsp2 (807-2720)	C|A|protein_coding|missense_variant|MODERATE|1214C>A|Ala405Asp
NC_045512.2	1480	nsp2 (807-2720)	C|A|protein_coding|synonymous_variant|LOW|1215C>A|Ala405Ala
NC_045512.2	1483	nsp2 (807-2720)	T|C|protein_coding|synonymous_variant|LOW|1218T>C|Phe406Phe
NC_045512.2	1486	nsp2 (807-2720)	A|C|protein_coding|synonymous_variant|LOW|1221A>C|Gly407Gly
NC_045512.2	1487	nsp2 (807-2720)	G|A|protein_coding|missense_variant|MODERATE|1222G>A|Gly408Ser
NC_045512.2	1489	nsp2 (807-2720)	C|T|protein_coding|synonymous_variant|LOW|1224C>T|Gly408Gly
NC_045512.2	1490	nsp2 (807-2720)	T|A|protein_coding|missense_variant|MODERATE|1225T>A|Cys409Ser
NC_045512.2	1493	nsp2 (807-2720)	G|A|protein_coding|missense_variant|MODERATE|1228G>A|Val410Met
NC_045512.2	1494	nsp2 (807-2720)	T|C|protein_coding|missense_variant|MODERATE|1229T>C|Val410Ala
NC_045512.2	1495	nsp2 (807-2720)	G|T|protein_coding|synonymous_variant|LOW|1230G>T|Val410Val
NC_045512.2	1498	nsp2 (807-2720)	C|T|protein_coding|synonymous_variant|LOW|1233C>T|Phe411Phe
NC_045512.2	1500	nsp2 (807-2720)	C|T|protein_coding|missense_variant|MODERATE|1235C>T|Ser412Phe
NC_045512.2	1501	nsp2 (807-2720)	T|C|protein_coding|synonymous_variant|LOW|1236T>C|Ser412Ser
NC_045512.2	1505	nsp2 (807-2720)	G|A|protein_coding|missense_variant|MODERATE|1240G>A|Val414Ile
NC_045512.2	1508	nsp2 (807-2720)	G|A|protein_coding|missense_variant|MODERATE|1243G>A|Gly415Ser
NC_045512.2	1510	nsp2 (807-2720)	T|C|protein_coding|synonymous_variant|LOW|1245T>C|Gly415Gly
NC_045512.2	1513	nsp2 (807-2720)	C|T|protein_coding|synonymous_variant|LOW|1248C>T|Cys416Cys
NC_045512.2	1514	nsp2 (807-2720)	C|T|protein_coding|missense_variant|MODERATE|1249C>T|His417Tyr
NC_045512.2	1515	nsp2 (807-2720)	A|G|protein_coding|missense_variant|MODERATE|1250A>G|His417Arg
NC_045512.2	1516	nsp2 (807-2720)	T|C|protein_coding|synonymous_variant|LOW|1251T>C|His417His
NC_045512.2	1519	nsp2 (807-2720)	C|T|protein_coding|synonymous_variant|LOW|1254C>T|Asn418Asn
NC_045512.2	1520	nsp2 (807-2720)	A|G|protein_coding|missense_variant|MODERATE|1255A>G|Lys419Glu
NC_045512.2	1521	nsp2 (807-2720)	A|G|protein_coding|missense_variant|MODERATE|1256A>G|Lys419Arg
NC_045512.2	1523	nsp2 (807-2720)	T|A|protein_coding|missense_variant|MODERATE|1258T>A|Cys420Ser
NC_045512.2	1524	nsp2 (807-2720)	G|A|protein_coding|missense_variant|MODERATE|1259G>A|Cys420Tyr
NC_045512.2	1525	nsp2 (807-2720)	T|C|protein_coding|synonymous_variant|LOW|1260T>C|Cys420Cys
NC_045512.2	1526	nsp2 (807-2720)	G|T|protein_coding|missense_variant|MODERATE|1261G>T|Ala421Ser
NC_045512.2	1528	nsp2 (807-2720)	C|T|protein_coding|synonymous_variant|LOW|1263C>T|Ala421Ala
NC_045512.2	1530	nsp2 (807-2720)	A|G|protein_coding|missense_variant|MODERATE|1265A>G|Tyr422Cys
NC_045512.2	1535	nsp2 (807-2720)	G|A|protein_coding|missense_variant|MODERATE|1270G>A|Val424Ile
NC_045512.2	1536	nsp2 (807-2720)	T|C|protein_coding|missense_variant|MODERATE|1271T>C|Val424Ala
NC_045512.2	1537	nsp2 (807-2720)	T|C|protein_coding|synonymous_variant|LOW|1272T>C|Val424Val
NC_045512.2	1540	nsp2 (807-2720)	A|G|protein_coding|synonymous_variant|LOW|1275A>G|Pro425Pro
NC_045512.2	1541	nsp2 (807-2720)	C|T|protein_coding|missense_variant|MODERATE|1276C>T|Arg426Cys
NC_045512.2	1545	nsp2 (807-2720)	C|T|protein_coding|missense_variant|MODERATE|1280C>T|Ala427Val
NC_045512.2	1547	nsp2 (807-2720)	A|G|protein_coding|missense_variant|MODERATE|1282A>G|Ser428Gly
NC_045512.2	1548	nsp2 (807-2720)	G|A|protein_coding|missense_variant|MODERATE|1283G>A|Ser428Asn
NC_045512.2	1549	nsp2 (807-2720)	C|T|protein_coding|synonymous_variant|LOW|1284C>T|Ser428Ser
NC_045512.2	1550	nsp2 (807-2720)	G|A|protein_coding|missense_variant|MODERATE|1285G>A|Ala429Thr
NC_045512.2	1551	nsp2 (807-2720)	C|T|protein_coding|missense_variant|MODERATE|1286C>T|Ala429Val
NC_045512.2	1555	nsp2 (807-2720)	C|T|protein_coding|synonymous_variant|LOW|1290C>T|Asn430Asn
NC_045512.2	1556	nsp2 (807-2720)	A|G|protein_coding|missense_variant|MODERATE|1291A>G|Ile431Val
NC_045512.2	1558	nsp2 (807-2720)	A|G|protein_coding|missense_variant|MODERATE|1293A>G|Ile431Met
NC_045512.2	1559	nsp2 (807-2720)	G|T|protein_coding|missense_variant|MODERATE|1294G>T|Gly432Cys
NC_045512.2	1562	nsp2 (807-2720)	T|C|protein_coding|missense_variant|MODERATE|1297T>C|Cys433Arg
NC_045512.2	1563	nsp2 (807-2720)	G|A|protein_coding|missense_variant|MODERATE|1298G>A|Cys433Tyr
NC_045512.2	1565	nsp2 (807-2720)	A|G|protein_coding|missense_variant|MODERATE|1300A>G|Asn434Asp
NC_045512.2	1566	nsp2 (807-2720)	A|G|protein_coding|missense_variant|MODERATE|1301A>G|Asn434Ser
NC_045512.2	1567	nsp2 (807-2720)	C|T|protein_coding|synonymous_variant|LOW|1302C>T|Asn434Asn
NC_045512.2	1568	nsp2 (807-2720)	C|T|protein_coding|missense_variant|MODERATE|1303C>T|His435Tyr
NC_045512.2	1570	nsp2 (807-2720)	T|C|protein_coding|synonymous_variant|LOW|1305T>C|His435His
NC_045512.2	1571	nsp2 (807-2720)	A|G|protein_coding|missense_variant|MODERATE|1306A>G|Thr436Ala
NC_045512.2	1572	nsp2 (807-2720)	C|T|protein_coding|missense_variant|MODERATE|1307C>T|Thr436Ile
NC_045512.2	1573	nsp2 (807-2720)	A|G|protein_coding|synonymous_variant|LOW|1308A>G|Thr436Thr
NC_045512.2	1574	nsp2 (807-2720)	G|T|protein_coding|missense_variant|MODERATE|1309G>T|Gly437Cys
NC_045512.2	1576	nsp2 (807-2720)	T|C|protein_coding|synonymous_variant|LOW|1311T>C|Gly437Gly
NC_045512.2	1577	nsp2 (807-2720)	G|T|protein_coding|missense_variant|MODERATE|1312G>T|Val438Phe
NC_045512.2	1579	nsp2 (807-2720)	T|A|protein_coding|synonymous_variant|LOW|1314T>A|Val438Val
NC_045512.2	1580	nsp2 (807-2720)	G|A|protein_coding|missense_variant|MODERATE|1315G>A|Val439Ile
NC_045512.2	1582	nsp2 (807-2720)	T|C|protein_coding|synonymous_variant|LOW|1317T>C|Val439Val
NC_045512.2	1583	nsp2 (807-2720)	G|A|protein_coding|missense_variant|MODERATE|1318G>A|Gly440Arg
NC_045512.2	1584	nsp2 (807-2720)	G|A|protein_coding|missense_variant|MODERATE|1319G>A|Gly440Glu
NC_045512.2	1585	nsp2 (807-2720)	A|T|protein_coding|synonymous_variant|LOW|1320A>T|Gly440Gly
NC_045512.2	1587	nsp2 (807-2720)	A|G|protein_coding|missense_variant|MODERATE|1322A>G|Glu441Gly
NC_045512.2	1589	nsp2 (807-2720)	G|A|protein_coding|missense_variant|MODERATE|1324G>A|Gly442Ser
NC_045512.2	1590	nsp2 (807-2720)	G|T|protein_coding|missense_variant|MODERATE|1325G>T|Gly442Val
NC_045512.2	1591	nsp2 (807-2720)	T|C|protein_coding|synonymous_variant|LOW|1326T>C|Gly442Gly
NC_045512.2	1592	nsp2 (807-2720)	T|A|protein_coding|missense_variant|MODERATE|1327T>A|Ser443Thr
NC_045512.2	1593	nsp2 (807-2720)	C|T|protein_coding|missense_variant|MODERATE|1328C>T|Ser443Phe
NC_045512.2	1594	nsp2 (807-2720)	C|T|protein_coding|synonymous_variant|LOW|1329C>T|Ser443Ser
NC_045512.2	1595	nsp2 (807-2720)	G|A|protein_coding|missense_variant|MODERATE|1330G>A|Glu444Lys
NC_045512.2	1598	nsp2 (807-2720)	G|A|protein_coding|missense_variant|MODERATE|1333G>A|Gly445Ser
NC_045512.2	1599	nsp2 (807-2720)	G|T|protein_coding|missense_variant|MODERATE|1334G>T|Gly445Val
NC_045512.2	1601	nsp2 (807-2720)	C|A|protein_coding|missense_variant|MODERATE|1336C>A|Leu446Ile
NC_045512.2	1602	nsp2 (807-2720)	T|A|protein_coding|missense_variant|MODERATE|1337T>A|Leu446His
NC_045512.2	1605	nsp2 (807-2720)	A|C|protein_coding|missense_variant|MODERATE|1340A>C|Asn447Thr
NC_045512.2	1606	nsp2 (807-2720)	T|C|protein_coding|synonymous_variant|LOW|1341T>C|Asn447Asn
NC_045512.2	1607	nsp2 (807-2720)	G|A|protein_coding|missense_variant|MODERATE|1342G>A|Asp448Asn
NC_045512.2	1609	nsp2 (807-2720)	C|T|protein_coding|synonymous_variant|LOW|1344C>T|Asp448Asp
NC_045512.2	1610	nsp2 (807-2720)	A|G|protein_coding|missense_variant|MODERATE|1345A>G|Asn449Asp
NC_045512.2	1612	nsp2 (807-2720)	C|T|protein_coding|synonymous_variant|LOW|1347C>T|Asn449Asn
NC_045512.2	1613	nsp2 (807-2720)	C|T|protein_coding|missense_variant|MODERATE|1348C>T|Leu450Phe
NC_045512.2	1616	nsp2 (807-2720)	C|T|protein_coding|missense_variant|MODERATE|1351C>T|Leu451Phe
NC_045512.2	1617	nsp2 (807-2720)	T|G|protein_coding|missense_variant|MODERATE|1352T>G|Leu451Arg
NC_045512.2	1620	nsp2 (807-2720)	A|G|protein_coding|missense_variant|MODERATE|1355A>G|Glu452Gly
NC_045512.2	1622	nsp2 (807-2720)	A|G|protein_coding|missense_variant|MODERATE|1357A>G|Ile453Val
NC_045512.2	1623	nsp2 (807-2720)	T|C|protein_coding|missense_variant|MODERATE|1358T>C|Ile453Thr
NC_045512.2	1625	nsp2 (807-2720)	C|T|protein_coding|missense_variant|MODERATE|1360C>T|Leu454Phe
NC_045512.2	1627	nsp2 (807-2720)	C|T|protein_coding|synonymous_variant|LOW|1362C>T|Leu454Leu
NC_045512.2	1629	nsp2 (807-2720)	A|C|protein_coding|missense_variant|MODERATE|1364A>C|Gln455Pro
NC_045512.2	1630	nsp2 (807-2720)	A|C|protein_coding|missense_variant|MODERATE|1365A>C|Gln455His
NC_045512.2	1631	nsp2 (807-2720)	A|C|protein_coding|missense_variant|MODERATE|1366A>C|Lys456Gln
NC_045512.2	1632	nsp2 (807-2720)	A|T|protein_coding|missense_variant|MODERATE|1367A>T|Lys456Ile
NC_045512.2	1635	nsp2 (807-2720)	A|G|protein_coding|missense_variant|MODERATE|1370A>G|Glu457Gly
NC_045512.2	1636	nsp2 (807-2720)	G|T|protein_coding|missense_variant|MODERATE|1371G>T|Glu457Asp
NC_045512.2	1637	nsp2 (807-2720)	A|T|protein_coding|stop_gained|HIGH|1372A>T|Lys458*
NC_045512.2	1639	nsp2 (807-2720)	A|T|protein_coding|missense_variant|MODERATE|1374A>T|Lys458Asn
NC_045512.2	1642	nsp2 (807-2720)	C|T|protein_coding|synonymous_variant|LOW|1377C>T|Val459Val
NC_045512.2	1643	nsp2 (807-2720)	A|G|protein_coding|missense_variant|MODERATE|1378A>G|Asn460Asp
NC_045512.2	1646	nsp2 (807-2720)	A|G|protein_coding|missense_variant|MODERATE|1381A>G|Ile461Val
NC_045512.2	1648	nsp2 (807-2720)	C|T|protein_coding|synonymous_variant|LOW|1383C>T|Ile461Ile
NC_045512.2	1651	nsp2 (807-2720)	T|C|protein_coding|synonymous_variant|LOW|1386T>C|Asn462Asn
NC_045512.2	1652	nsp2 (807-2720)	A|G|protein_coding|missense_variant|MODERATE|1387A>G|Ile463Val
NC_045512.2	1653	nsp2 (807-2720)	T|C|protein_coding|missense_variant|MODERATE|1388T>C|Ile463Thr
NC_045512.2	1655	nsp2 (807-2720)	G|T|protein_coding|missense_variant|MODERATE|1390G>T|Val464Phe
NC_045512.2	1656	nsp2 (807-2720)	T|C|protein_coding|missense_variant|MODERATE|1391T>C|Val464Ala
NC_045512.2	1657	nsp2 (807-2720)	T|A|protein_coding|synonymous_variant|LOW|1392T>A|Val464Val
NC_045512.2	1658	nsp2 (807-2720)	G|T|protein_coding|missense_variant|MODERATE|1393G>T|Gly465Cys
NC_045512.2	1659	nsp2 (807-2720)	G|T|protein_coding|missense_variant|MODERATE|1394G>T|Gly465Val
NC_045512.2	1661	nsp2 (807-2720)	G|T|protein_coding|missense_variant|MODERATE|1396G>T|Asp466Tyr
NC_045512.2	1662	nsp2 (807-2720)	A|G|protein_coding|missense_variant|MODERATE|1397A>G|Asp466Gly
NC_045512.2	1663	nsp2 (807-2720)	C|T|protein_coding|synonymous_variant|LOW|1398C>T|Asp466Asp
NC_045512.2	1666	nsp2 (807-2720)	T|C|protein_coding|synonymous_variant|LOW|1401T>C|Phe467Phe
NC_045512.2	1667	nsp2 (807-2720)	A|G|protein_coding|missense_variant|MODERATE|1402A>G|Lys468Glu
NC_045512.2	1668	nsp2 (807-2720)	A|G|protein_coding|missense_variant|MODERATE|1403A>G|Lys468Arg
NC_045512.2	1669	nsp2 (807-2720)	A|G|protein_coding|synonymous_variant|LOW|1404A>G|Lys468Lys
NC_045512.2	1670	nsp2 (807-2720)	C|T|protein_coding|missense_variant|MODERATE|1405C>T|Leu469Phe
NC_045512.2	1671	nsp2 (807-2720)	T|C|protein_coding|missense_variant|MODERATE|1406T>C|Leu469Pro
NC_045512.2	1674	nsp2 (807-2720)	A|G|protein_coding|missense_variant|MODERATE|1409A>G|Asn470Ser
NC_045512.2	1675	nsp2 (807-2720)	T|C|protein_coding|synonymous_variant|LOW|1410T>C|Asn470Asn
NC_045512.2	1677	nsp2 (807-2720)	A|T|protein_coding|missense_variant|MODERATE|1412A>T|Glu471Val
NC_045512.2	1678	nsp2 (807-2720)	A|G|protein_coding|synonymous_variant|LOW|1413A>G|Glu471Glu
NC_045512.2	1679	nsp2 (807-2720)	G|A|protein_coding|missense_variant|MODERATE|1414G>A|Glu472Lys
NC_045512.2	1681	nsp2 (807-2720)	G|A|protein_coding|synonymous_variant|LOW|1416G>A|Glu472Glu
NC_045512.2	1683	nsp2 (807-2720)	T|C|protein_coding|missense_variant|MODERATE|1418T>C|Ile473Thr
NC_045512.2	1684	nsp2 (807-2720)	C|T|protein_coding|synonymous_variant|LOW|1419C>T|Ile473Ile
NC_045512.2	1685	nsp2 (807-2720)	G|A|protein_coding|missense_variant|MODERATE|1420G>A|Ala474Thr
NC_045512.2	1686	nsp2 (807-2720)	C|T|protein_coding|missense_variant|MODERATE|1421C>T|Ala474Val
NC_045512.2	1687	nsp2 (807-2720)	C|T|protein_coding|synonymous_variant|LOW|1422C>T|Ala474Ala
NC_045512.2	1691	nsp2 (807-2720)	A|G|protein_coding|missense_variant|MODERATE|1426A>G|Ile476Val
NC_045512.2	1692	nsp2 (807-2720)	T|C|protein_coding|missense_variant|MODERATE|1427T>C|Ile476Thr
NC_045512.2	1694	nsp2 (807-2720)	T|C|protein_coding|synonymous_variant|LOW|1429T>C|Leu477Leu
NC_045512.2	1696	nsp2 (807-2720)	G|A|protein_coding|synonymous_variant|LOW|1431G>A|Leu477Leu
NC_045512.2	1697	nsp2 (807-2720)	G|T|protein_coding|missense_variant|MODERATE|1432G>T|Ala478Ser
NC_045512.2	1698	nsp2 (807-2720)	C|T|protein_coding|missense_variant|MODERATE|1433C>T|Ala478Val
NC_045512.2	1699	nsp2 (807-2720)	A|G|protein_coding|synonymous_variant|LOW|1434A>G|Ala478Ala
NC_045512.2	1701	nsp2 (807-2720)	C|T|protein_coding|missense_variant|MODERATE|1436C>T|Ser479Phe
NC_045512.2	1703	nsp2 (807-2720)	T|C|protein_coding|missense_variant|MODERATE|1438T>C|Phe480Leu
NC_045512.2	1704	nsp2 (807-2720)	T|G|protein_coding|missense_variant|MODERATE|1439T>G|Phe480Cys
NC_045512.2	1705	nsp2 (807-2720)	T|A|protein_coding|missense_variant|MODERATE|1440T>A|Phe480Leu
NC_045512.2	1707	nsp2 (807-2720)	C|A|protein_coding|missense_variant|MODERATE|1442C>A|Ser481Tyr
NC_045512.2	1708	nsp2 (807-2720)	T|C|protein_coding|synonymous_variant|LOW|1443T>C|Ser481Ser
NC_045512.2	1709	nsp2 (807-2720)	G|A|protein_coding|missense_variant|MODERATE|1444G>A|Ala482Thr
NC_045512.2	1710	nsp2 (807-2720)	C|T|protein_coding|missense_variant|MODERATE|1445C>T|Ala482Val
NC_045512.2	1711	nsp2 (807-2720)	T|A|protein_coding|synonymous_variant|LOW|1446T>A|Ala482Ala
NC_045512.2	1713	nsp2 (807-2720)	C|A|protein_coding|missense_variant|MODERATE|1448C>A|Ser483Tyr
NC_045512.2	1714	nsp2 (807-2720)	C|T|protein_coding|synonymous_variant|LOW|1449C>T|Ser483Ser
NC_045512.2	1716	nsp2 (807-2720)	C|T|protein_coding|missense_variant|MODERATE|1451C>T|Thr484Ile
NC_045512.2	1717	nsp2 (807-2720)	A|G|protein_coding|synonymous_variant|LOW|1452A>G|Thr484Thr
NC_045512.2	1719	nsp2 (807-2720)	G|A|protein_coding|missense_variant|MODERATE|1454G>A|Ser485Asn
NC_045512.2	1721	nsp2 (807-2720)	G|T|protein_coding|missense_variant|MODERATE|1456G>T|Ala486Ser
NC_045512.2	1722	nsp2 (807-2720)	C|T|protein_coding|missense_variant|MODERATE|1457C>T|Ala486Val
NC_045512.2	1723	nsp2 (807-2720)	T|A|protein_coding|synonymous_variant|LOW|1458T>A|Ala486Ala
NC_045512.2	1724	nsp2 (807-2720)	T|G|protein_coding|missense_variant|MODERATE|1459T>G|Phe487Val
NC_045512.2	1727	nsp2 (807-2720)	G|A|protein_coding|missense_variant|MODERATE|1462G>A|Val488Met
NC_045512.2	1729	nsp2 (807-2720)	G|A|protein_coding|synonymous_variant|LOW|1464G>A|Val488Val
NC_045512.2	1730	nsp2 (807-2720)	G|A|protein_coding|missense_variant|MODERATE|1465G>A|Glu489Lys
NC_045512.2	1731	nsp2 (807-2720)	A|C|protein_coding|missense_variant|MODERATE|1466A>C|Glu489Ala
NC_045512.2	1733	nsp2 (807-2720)	A|G|protein_coding|missense_variant|MODERATE|1468A>G|Thr490Ala
NC_045512.2	1734	nsp2 (807-2720)	C|T|protein_coding|missense_variant|MODERATE|1469C>T|Thr490Ile
NC_045512.2	1736	nsp2 (807-2720)	G|A|protein_coding|missense_variant|MODERATE|1471G>A|Val491Met
NC_045512.2	1738	nsp2 (807-2720)	G|T|protein_coding|synonymous_variant|LOW|1473G>T|Val491Val
NC_045512.2	1740	nsp2 (807-2720)	A|G|protein_coding|missense_variant|MODERATE|1475A>G|Lys492Arg
NC_045512.2	1741	nsp2 (807-2720)	A|G|protein_coding|synonymous_variant|LOW|1476A>G|Lys492Lys
NC_045512.2	1742	nsp2 (807-2720)	G|T|protein_coding|missense_variant|MODERATE|1477G>T|Gly493Cys
NC_045512.2	1743	nsp2 (807-2720)	G|A|protein_coding|missense_variant|MODERATE|1478G>A|Gly493Asp
NC_045512.2	1744	nsp2 (807-2720)	T|C|protein_coding|synonymous_variant|LOW|1479T>C|Gly493Gly
NC_045512.2	1745	nsp2 (807-2720)	T|G|protein_coding|missense_variant|MODERATE|1480T>G|Leu494Val
NC_045512.2	1747	nsp2 (807-2720)	G|A|protein_coding|synonymous_variant|LOW|1482G>A|Leu494Leu
NC_045512.2	1748	nsp2 (807-2720)	G|A|protein_coding|missense_variant|MODERATE|1483G>A|Asp495Asn
NC_045512.2	1750	nsp2 (807-2720)	T|C|protein_coding|synonymous_variant|LOW|1485T>C|Asp495Asp
NC_045512.2	1755	nsp2 (807-2720)	A|G|protein_coding|missense_variant|MODERATE|1490A>G|Lys497Arg
NC_045512.2	1756	nsp2 (807-2720)	A|G|protein_coding|synonymous_variant|LOW|1491A>G|Lys497Lys
NC_045512.2	1757	nsp2 (807-2720)	G|A|protein_coding|missense_variant|MODERATE|1492G>A|Ala498Thr
NC_045512.2	1758	nsp2 (807-2720)	C|T|protein_coding|missense_variant|MODERATE|1493C>T|Ala498Val
NC_045512.2	1759	nsp2 (807-2720)	A|G|protein_coding|synonymous_variant|LOW|1494A>G|Ala498Ala
NC_045512.2	1760	nsp2 (807-2720)	T|C|protein_coding|missense_variant|MODERATE|1495T>C|Phe499Leu
NC_045512.2	1761	nsp2 (807-2720)	T|C|protein_coding|missense_variant|MODERATE|1496T>C|Phe499Ser
NC_045512.2	1762	nsp2 (807-2720)	C|T|protein_coding|synonymous_variant|LOW|1497C>T|Phe499Phe
NC_045512.2	1766	nsp2 (807-2720)	C|A|protein_coding|missense_variant|MODERATE|1501C>A|Gln501Lys
NC_045512.2	1773	nsp2 (807-2720)	T|C|protein_coding|missense_variant|MODERATE|1508T>C|Val503Ala
NC_045512.2	1774	nsp2 (807-2720)	T|C|protein_coding|synonymous_variant|LOW|1509T>C|Val503Val
NC_045512.2	1775	nsp2 (807-2720)	G|A|protein_coding|missense_variant|MODERATE|1510G>A|Glu504Lys
NC_045512.2	1777	nsp2 (807-2720)	A|G|protein_coding|synonymous_variant|LOW|1512A>G|Glu504Glu
NC_045512.2	1778	nsp2 (807-2720)	T|C|protein_coding|missense_variant|MODERATE|1513T>C|Ser505Pro
NC_045512.2	1779	nsp2 (807-2720)	C|T|protein_coding|missense_variant|MODERATE|1514C>T|Ser505Phe
NC_045512.2	1780	nsp2 (807-2720)	C|T|protein_coding|synonymous_variant|LOW|1515C>T|Ser505Ser
NC_045512.2	1782	nsp2 (807-2720)	G|A|protein_coding|missense_variant|MODERATE|1517G>A|Cys506Tyr
NC_045512.2	1784	nsp2 (807-2720)	G|A|protein_coding|missense_variant|MODERATE|1519G>A|Gly507Ser
NC_045512.2	1789	nsp2 (807-2720)	T|A|protein_coding|missense_variant|MODERATE|1524T>A|Asn508Lys
NC_045512.2	1793	nsp2 (807-2720)	A|T|protein_coding|stop_gained|HIGH|1528A>T|Lys510*
NC_045512.2	1796	nsp2 (807-2720)	G|A|protein_coding|missense_variant|MODERATE|1531G>A|Val511Ile
NC_045512.2	1798	nsp2 (807-2720)	T|A|protein_coding|synonymous_variant|LOW|1533T>A|Val511Val
NC_045512.2	1800	nsp2 (807-2720)	C|T|protein_coding|missense_variant|MODERATE|1535C>T|Thr512Ile
NC_045512.2	1801	nsp2 (807-2720)	A|G|protein_coding|synonymous_variant|LOW|1536A>G|Thr512Thr
NC_045512.2	1802	nsp2 (807-2720)	A|G|protein_coding|missense_variant|MODERATE|1537A>G|Lys513Glu
NC_045512.2	1805	nsp2 (807-2720)	G|A|protein_coding|missense_variant|MODERATE|1540G>A|Gly514Arg
NC_045512.2	1806	nsp2 (807-2720)	G|A|protein_coding|missense_variant|MODERATE|1541G>A|Gly514Glu
NC_045512.2	1807	nsp2 (807-2720)	A|G|protein_coding|synonymous_variant|LOW|1542A>G|Gly514Gly
NC_045512.2	1808	nsp2 (807-2720)	A|G|protein_coding|missense_variant|MODERATE|1543A>G|Lys515Glu
NC_045512.2	1809	nsp2 (807-2720)	A|G|protein_coding|missense_variant|MODERATE|1544A>G|Lys515Arg
NC_045512.2	1811	nsp2 (807-2720)	G|A|protein_coding|missense_variant|MODERATE|1546G>A|Ala516Thr
NC_045512.2	1812	nsp2 (807-2720)	C|T|protein_coding|missense_variant|MODERATE|1547C>T|Ala516Val
NC_045512.2	1813	nsp2 (807-2720)	T|A|protein_coding|synonymous_variant|LOW|1548T>A|Ala516Ala
NC_045512.2	1815	nsp2 (807-2720)	A|G|protein_coding|missense_variant|MODERATE|1550A>G|Lys517Arg
NC_045512.2	1817	nsp2 (807-2720)	A|G|protein_coding|missense_variant|MODERATE|1552A>G|Lys518Glu
NC_045512.2	1819	nsp2 (807-2720)	A|G|protein_coding|synonymous_variant|LOW|1554A>G|Lys518Lys
NC_045512.2	1820	nsp2 (807-2720)	G|A|protein_coding|missense_variant|MODERATE|1555G>A|Gly519Ser
NC_045512.2	1821	nsp2 (807-2720)	G|A|protein_coding|missense_variant|MODERATE|1556G>A|Gly519Asp
NC_045512.2	1822	nsp2 (807-2720)	T|C|protein_coding|synonymous_variant|LOW|1557T>C|Gly519Gly
NC_045512.2	1824	nsp2 (807-2720)	C|T|protein_coding|missense_variant|MODERATE|1559C>T|Ala520Val
NC_045512.2	1825	nsp2 (807-2720)	C|T|protein_coding|synonymous_variant|LOW|1560C>T|Ala520Ala
NC_045512.2	1829	nsp2 (807-2720)	A|G|protein_coding|missense_variant|MODERATE|1564A>G|Asn522Asp
NC_045512.2	1830	nsp2 (807-2720)	A|C|protein_coding|missense_variant|MODERATE|1565A>C|Asn522Thr
NC_045512.2	1831	nsp2 (807-2720)	T|C|protein_coding|synonymous_variant|LOW|1566T>C|Asn522Asn
NC_045512.2	1832	nsp2 (807-2720)	A|G|protein_coding|missense_variant|MODERATE|1567A>G|Ile523Val
NC_045512.2	1835	nsp2 (807-2720)	G|A|protein_coding|missense_variant|MODERATE|1570G>A|Gly524Ser
NC_045512.2	1837	nsp2 (807-2720)	T|C|protein_coding|synonymous_variant|LOW|1572T>C|Gly524Gly
NC_045512.2	1839	nsp2 (807-2720)	A|G|protein_coding|missense_variant|MODERATE|1574A>G|Glu525Gly
NC_045512.2	1842	nsp2 (807-2720)	A|G|protein_coding|missense_variant|MODERATE|1577A>G|Gln526Arg
NC_045512.2	1843	nsp2 (807-2720)	G|T|protein_coding|missense_variant|MODERATE|1578G>T|Gln526His
NC_045512.2	1846	nsp2 (807-2720)	A|G|protein_coding|synonymous_variant|LOW|1581A>G|Lys527Lys
NC_045512.2	1847	nsp2 (807-2720)	T|C|protein_coding|missense_variant|MODERATE|1582T>C|Ser528Pro
NC_045512.2	1848	nsp2 (807-2720)	C|T|protein_coding|missense_variant|MODERATE|1583C>T|Ser528Leu
NC_045512.2	1851	nsp2 (807-2720)	T|C|protein_coding|missense_variant|MODERATE|1586T>C|Ile529Thr
NC_045512.2	1852	nsp2 (807-2720)	A|G|protein_coding|missense_variant|MODERATE|1587A>G|Ile529Met
NC_045512.2	1853	nsp2 (807-2720)	C|T|protein_coding|synonymous_variant|LOW|1588C>T|Leu530Leu
NC_045512.2	1855	nsp2 (807-2720)	G|T|protein_coding|synonymous_variant|LOW|1590G>T|Leu530Leu
NC_045512.2	1856	nsp2 (807-2720)	A|G|protein_coding|missense_variant|MODERATE|1591A>G|Ser531Gly
NC_045512.2	1857	nsp2 (807-2720)	G|A|protein_coding|missense_variant|MODERATE|1592G>A|Ser531Asn
NC_045512.2	1858	nsp2 (807-2720)	T|G|protein_coding|missense_variant|MODERATE|1593T>G|Ser531Arg
NC_045512.2	1859	nsp2 (807-2720)	C|T|protein_coding|missense_variant|MODERATE|1594C>T|Pro532Ser
NC_045512.2	1860	nsp2 (807-2720)	C|T|protein_coding|missense_variant|MODERATE|1595C>T|Pro532Leu
NC_045512.2	1862	nsp2 (807-2720)	C|T|protein_coding|missense_variant|MODERATE|1597C>T|Leu533Phe
NC_045512.2	1863	nsp2 (807-2720)	T|A|protein_coding|missense_variant|MODERATE|1598T>A|Leu533His
NC_045512.2	1864	nsp2 (807-2720)	T|G|protein_coding|synonymous_variant|LOW|1599T>G|Leu533Leu
NC_045512.2	1867	nsp2 (807-2720)	T|C|protein_coding|synonymous_variant|LOW|1602T>C|Tyr534Tyr
NC_045512.2	1868	nsp2 (807-2720)	G|A|protein_coding|missense_variant|MODERATE|1603G>A|Ala535Thr
NC_045512.2	1869	nsp2 (807-2720)	C|T|protein_coding|missense_variant|MODERATE|1604C>T|Ala535Val
NC_045512.2	1870	nsp2 (807-2720)	A|T|protein_coding|synonymous_variant|LOW|1605A>T|Ala535Ala
NC_045512.2	1871	nsp2 (807-2720)	T|G|protein_coding|missense_variant|MODERATE|1606T>G|Phe536Val
NC_045512.2	1872	nsp2 (807-2720)	T|G|protein_coding|missense_variant|MODERATE|1607T>G|Phe536Cys
NC_045512.2	1873	nsp2 (807-2720)	T|G|protein_coding|missense_variant|MODERATE|1608T>G|Phe536Leu
NC_045512.2	1874	nsp2 (807-2720)	G|T|protein_coding|missense_variant|MODERATE|1609G>T|Ala537Ser
NC_045512.2	1875	nsp2 (807-2720)	C|T|protein_coding|missense_variant|MODERATE|1610C>T|Ala537Val
NC_045512.2	1876	nsp2 (807-2720)	A|C|protein_coding|synonymous_variant|LOW|1611A>C|Ala537Ala
NC_045512.2	1877	nsp2 (807-2720)	T|C|protein_coding|missense_variant|MODERATE|1612T>C|Ser538Pro
NC_045512.2	1878	nsp2 (807-2720)	C|T|protein_coding|missense_variant|MODERATE|1613C>T|Ser538Leu
NC_045512.2	1880	nsp2 (807-2720)	G|A|protein_coding|missense_variant|MODERATE|1615G>A|Glu539Lys
NC_045512.2	1882	nsp2 (807-2720)	G|T|protein_coding|missense_variant|MODERATE|1617G>T|Glu539Asp
NC_045512.2	1883	nsp2 (807-2720)	G|A|protein_coding|missense_variant|MODERATE|1618G>A|Ala540Thr
NC_045512.2	1884	nsp2 (807-2720)	C|T|protein_coding|missense_variant|MODERATE|1619C>T|Ala540Val
NC_045512.2	1885	nsp2 (807-2720)	T|C|protein_coding|synonymous_variant|LOW|1620T>C|Ala540Ala
NC_045512.2	1886	nsp2 (807-2720)	G|T|protein_coding|missense_variant|MODERATE|1621G>T|Ala541Ser
NC_045512.2	1887	nsp2 (807-2720)	C|T|protein_coding|missense_variant|MODERATE|1622C>T|Ala541Val
NC_045512.2	1888	nsp2 (807-2720)	T|C|protein_coding|synonymous_variant|LOW|1623T>C|Ala541Ala
NC_045512.2	1889	nsp2 (807-2720)	C|T|protein_coding|missense_variant|MODERATE|1624C>T|Arg542Cys
NC_045512.2	1890	nsp2 (807-2720)	G|A|protein_coding|missense_variant|MODERATE|1625G>A|Arg542His
NC_045512.2	1891	nsp2 (807-2720)	T|G|protein_coding|synonymous_variant|LOW|1626T>G|Arg542Arg
NC_045512.2	1895	nsp2 (807-2720)	G|T|protein_coding|missense_variant|MODERATE|1630G>T|Val544Leu
NC_045512.2	1896	nsp2 (807-2720)	T|C|protein_coding|missense_variant|MODERATE|1631T>C|Val544Ala
NC_045512.2	1897	nsp2 (807-2720)	A|G|protein_coding|synonymous_variant|LOW|1632A>G|Val544Val
NC_045512.2	1900	nsp2 (807-2720)	A|G|protein_coding|synonymous_variant|LOW|1635A>G|Arg545Arg
NC_045512.2	1902	nsp2 (807-2720)	C|T|protein_coding|missense_variant|MODERATE|1637C>T|Ser546Leu
NC_045512.2	1904	nsp2 (807-2720)	A|G|protein_coding|missense_variant|MODERATE|1639A>G|Ile547Val
NC_045512.2	1905	nsp2 (807-2720)	T|G|protein_coding|missense_variant|MODERATE|1640T>G|Ile547Ser
NC_045512.2	1906	nsp2 (807-2720)	T|C|protein_coding|synonymous_variant|LOW|1641T>C|Ile547Ile
NC_045512.2	1908	nsp2 (807-2720)	T|C|protein_coding|missense_variant|MODERATE|1643T>C|Phe548Ser
NC_045512.2	1909	nsp2 (807-2720)	C|T|protein_coding|synonymous_variant|LOW|1644C>T|Phe548Phe
NC_045512.2	1910	nsp2 (807-2720)	T|A|protein_coding|missense_variant|MODERATE|1645T>A|Ser549Thr
NC_045512.2	1911	nsp2 (807-2720)	C|T|protein_coding|missense_variant|MODERATE|1646C>T|Ser549Phe
NC_045512.2	1912	nsp2 (807-2720)	C|T|protein_coding|synonymous_variant|LOW|1647C>T|Ser549Ser
NC_045512.2	1913	nsp2 (807-2720)	C|T|protein_coding|missense_variant|MODERATE|1648C>T|Arg550Cys
NC_045512.2	1914	nsp2 (807-2720)	G|A|protein_coding|missense_variant|MODERATE|1649G>A|Arg550His
NC_045512.2	1915	nsp2 (807-2720)	C|T|protein_coding|synonymous_variant|LOW|1650C>T|Arg550Arg
NC_045512.2	1916	nsp2 (807-2720)	A|G|protein_coding|missense_variant|MODERATE|1651A>G|Thr551Ala
NC_045512.2	1917	nsp2 (807-2720)	C|T|protein_coding|missense_variant|MODERATE|1652C>T|Thr551Ile
NC_045512.2	1918	nsp2 (807-2720)	T|C|protein_coding|synonymous_variant|LOW|1653T>C|Thr551Thr
NC_045512.2	1920	nsp2 (807-2720)	T|A|protein_coding|missense_variant|MODERATE|1655T>A|Leu552His
NC_045512.2	1921	nsp2 (807-2720)	T|A|protein_coding|synonymous_variant|LOW|1656T>A|Leu552Leu
NC_045512.2	1924	nsp2 (807-2720)	A|G|protein_coding|synonymous_variant|LOW|1659A>G|Glu553Glu
NC_045512.2	1925	nsp2 (807-2720)	A|G|protein_coding|missense_variant|MODERATE|1660A>G|Thr554Ala
NC_045512.2	1926	nsp2 (807-2720)	C|T|protein_coding|missense_variant|MODERATE|1661C>T|Thr554Ile
NC_045512.2	1927	nsp2 (807-2720)	T|C|protein_coding|synonymous_variant|LOW|1662T>C|Thr554Thr
NC_045512.2	1929	nsp2 (807-2720)	C|T|protein_coding|missense_variant|MODERATE|1664C>T|Ala555Val
NC_045512.2	1931	nsp2 (807-2720)	C|A|protein_coding|missense_variant|MODERATE|1666C>A|Gln556Lys
NC_045512.2	1934	nsp2 (807-2720)	A|G|protein_coding|missense_variant|MODERATE|1669A>G|Asn557Asp
NC_045512.2	1935	nsp2 (807-2720)	A|G|protein_coding|missense_variant|MODERATE|1670A>G|Asn557Ser
NC_045512.2	1936	nsp2 (807-2720)	T|C|protein_coding|synonymous_variant|LOW|1671T>C|Asn557Asn
NC_045512.2	1937	nsp2 (807-2720)	T|C|protein_coding|missense_variant|MODERATE|1672T>C|Ser558Pro
NC_045512.2	1938	nsp2 (807-2720)	C|T|protein_coding|missense_variant|MODERATE|1673C>T|Ser558Phe
NC_045512.2	1939	nsp2 (807-2720)	T|C|protein_coding|synonymous_variant|LOW|1674T>C|Ser558Ser
NC_045512.2	1940	nsp2 (807-2720)	G|A|protein_coding|missense_variant|MODERATE|1675G>A|Val559Met
NC_045512.2	1941	nsp2 (807-2720)	T|G|protein_coding|missense_variant|MODERATE|1676T>G|Val559Gly
NC_045512.2	1942	nsp2 (807-2720)	G|T|protein_coding|synonymous_variant|LOW|1677G>T|Val559Val
NC_045512.2	1943	nsp2 (807-2720)	C|T|protein_coding|missense_variant|MODERATE|1678C>T|Arg560Cys
NC_045512.2	1944	nsp2 (807-2720)	G|A|protein_coding|missense_variant|MODERATE|1679G>A|Arg560His
NC_045512.2	1945	nsp2 (807-2720)	T|C|protein_coding|synonymous_variant|LOW|1680T>C|Arg560Arg
NC_045512.2	1946	nsp2 (807-2720)	G|T|protein_coding|missense_variant|MODERATE|1681G>T|Val561Phe
NC_045512.2	1947	nsp2 (807-2720)	T|C|protein_coding|missense_variant|MODERATE|1682T>C|Val561Ala
NC_045512.2	1951	nsp2 (807-2720)	A|G|protein_coding|synonymous_variant|LOW|1686A>G|Leu562Leu
NC_045512.2	1953	nsp2 (807-2720)	A|G|protein_coding|missense_variant|MODERATE|1688A>G|Gln563Arg
NC_045512.2	1954	nsp2 (807-2720)	G|A|protein_coding|synonymous_variant|LOW|1689G>A|Gln563Gln
NC_045512.2	1957	nsp2 (807-2720)	G|T|protein_coding|missense_variant|MODERATE|1692G>T|Lys564Asn
NC_045512.2	1958	nsp2 (807-2720)	G|A|protein_coding|missense_variant|MODERATE|1693G>A|Ala565Thr
NC_045512.2	1959	nsp2 (807-2720)	C|T|protein_coding|missense_variant|MODERATE|1694C>T|Ala565Val
NC_045512.2	1960	nsp2 (807-2720)	C|T|protein_coding|synonymous_variant|LOW|1695C>T|Ala565Ala
NC_045512.2	1962	nsp2 (807-2720)	C|T|protein_coding|missense_variant|MODERATE|1697C>T|Ala566Val
NC_045512.2	1964	nsp2 (807-2720)	A|C|protein_coding|missense_variant|MODERATE|1699A>C|Ile567Leu
NC_045512.2	1965	nsp2 (807-2720)	T|C|protein_coding|missense_variant|MODERATE|1700T>C|Ile567Thr
NC_045512.2	1968	nsp2 (807-2720)	C|T|protein_coding|missense_variant|MODERATE|1703C>T|Thr568Ile
NC_045512.2	1972	nsp2 (807-2720)	A|G|protein_coding|missense_variant|MODERATE|1707A>G|Ile569Met
NC_045512.2	1973	nsp2 (807-2720)	C|T|protein_coding|synonymous_variant|LOW|1708C>T|Leu570Leu
NC_045512.2	1976	nsp2 (807-2720)	G|T|protein_coding|missense_variant|MODERATE|1711G>T|Asp571Tyr
NC_045512.2	1977	nsp2 (807-2720)	A|T|protein_coding|missense_variant|MODERATE|1712A>T|Asp571Val
NC_045512.2	1978	nsp2 (807-2720)	T|A|protein_coding|missense_variant|MODERATE|1713T>A|Asp571Glu
NC_045512.2	1979	nsp2 (807-2720)	G|A|protein_coding|missense_variant|MODERATE|1714G>A|Gly572Arg
NC_045512.2	1980	nsp2 (807-2720)	G|A|protein_coding|missense_variant|MODERATE|1715G>A|Gly572Glu
NC_045512.2	1981	nsp2 (807-2720)	A|G|protein_coding|synonymous_variant|LOW|1716A>G|Gly572Gly
NC_045512.2	1982	nsp2 (807-2720)	A|G|protein_coding|missense_variant|MODERATE|1717A>G|Ile573Val
NC_045512.2	1983	nsp2 (807-2720)	T|C|protein_coding|missense_variant|MODERATE|1718T>C|Ile573Thr
NC_045512.2	1984	nsp2 (807-2720)	T|C|protein_coding|synonymous_variant|LOW|1719T>C|Ile573Ile
NC_045512.2	1987	nsp2 (807-2720)	A|G|protein_coding|synonymous_variant|LOW|1722A>G|Ser574Ser
NC_045512.2	1989	nsp2 (807-2720)	A|G|protein_coding|missense_variant|MODERATE|1724A>G|Gln575Arg
NC_045512.2	1992	nsp2 (807-2720)	A|G|protein_coding|missense_variant|MODERATE|1727A>G|Tyr576Cys
NC_045512.2	1993	nsp2 (807-2720)	T|C|protein_coding|synonymous_variant|LOW|1728T>C|Tyr576Tyr
NC_045512.2	1996	nsp2 (807-2720)	A|C|protein_coding|synonymous_variant|LOW|1731A>C|Ser577Ser
NC_045512.2	1997	nsp2 (807-2720)	C|T|protein_coding|synonymous_variant|LOW|1732C>T|Leu578Leu
NC_045512.2	1998	nsp2 (807-2720)	T|A|protein_coding|missense_variant|MODERATE|1733T>A|Leu578Gln
NC_045512.2	1999	nsp2 (807-2720)	G|T|protein_coding|synonymous_variant|LOW|1734G>T|Leu578Leu
NC_045512.2	2000	nsp2 (807-2720)	A|G|protein_coding|missense_variant|MODERATE|1735A>G|Arg579Gly
NC_045512.2	2001	nsp2 (807-2720)	G|A|protein_coding|missense_variant|MODERATE|1736G>A|Arg579Lys
NC_045512.2	2002	nsp2 (807-2720)	A|C|protein_coding|missense_variant|MODERATE|1737A>C|Arg579Ser
NC_045512.2	2003	nsp2 (807-2720)	C|T|protein_coding|missense_variant|MODERATE|1738C>T|Leu580Phe
NC_045512.2	2005	nsp2 (807-2720)	C|T|protein_coding|synonymous_variant|LOW|1740C>T|Leu580Leu
NC_045512.2	2006	nsp2 (807-2720)	A|C|protein_coding|missense_variant|MODERATE|1741A>C|Ile581Leu
NC_045512.2	2009	nsp2 (807-2720)	G|A|protein_coding|missense_variant|MODERATE|1744G>A|Asp582Asn
NC_045512.2	2010	nsp2 (807-2720)	A|C|protein_coding|missense_variant|MODERATE|1745A>C|Asp582Ala
NC_045512.2	2013	nsp2 (807-2720)	C|T|protein_coding|missense_variant|MODERATE|1748C>T|Ala583Val
NC_045512.2	2015	nsp2 (807-2720)	A|G|protein_coding|missense_variant|MODERATE|1750A>G|Met584Val
NC_045512.2	2017	nsp2 (807-2720)	G|A|protein_coding|missense_variant|MODERATE|1752G>A|Met584Ile
NC_045512.2	2018	nsp2 (807-2720)	A|G|protein_coding|missense_variant|MODERATE|1753A>G|Met585Val
NC_045512.2	2022	nsp2 (807-2720)	T|G|protein_coding|missense_variant|MODERATE|1757T>G|Phe586Cys
NC_045512.2	2023	nsp2 (807-2720)	C|T|protein_coding|synonymous_variant|LOW|1758C>T|Phe586Phe
NC_045512.2	2026	nsp2 (807-2720)	A|G|protein_coding|synonymous_variant|LOW|1761A>G|Thr587Thr
NC_045512.2	2028	nsp2 (807-2720)	C|T|protein_coding|missense_variant|MODERATE|1763C>T|Ser588Phe
NC_045512.2	2029	nsp2 (807-2720)	T|C|protein_coding|synonymous_variant|LOW|1764T>C|Ser588Ser
NC_045512.2	2031	nsp2 (807-2720)	A|T|protein_coding|missense_variant|MODERATE|1766A>T|Asp589Val
NC_045512.2	2032	nsp2 (807-2720)	T|G|protein_coding|missense_variant|MODERATE|1767T>G|Asp589Glu
NC_045512.2	2035	nsp2 (807-2720)	G|T|protein_coding|missense_variant|MODERATE|1770G>T|Leu590Phe
NC_045512.2	2036	nsp2 (807-2720)	G|T|protein_coding|missense_variant|MODERATE|1771G>T|Ala591Ser
NC_045512.2	2037	nsp2 (807-2720)	C|T|protein_coding|missense_variant|MODERATE|1772C>T|Ala591Val
NC_045512.2	2040	nsp2 (807-2720)	C|T|protein_coding|missense_variant|MODERATE|1775C>T|Thr592Ile
NC_045512.2	2041	nsp2 (807-2720)	T|C|protein_coding|synonymous_variant|LOW|1776T>C|Thr592Thr
NC_045512.2	2043	nsp2 (807-2720)	A|G|protein_coding|missense_variant|MODERATE|1778A>G|Asn593Ser
NC_045512.2	2044	nsp2 (807-2720)	C|G|protein_coding|missense_variant|MODERATE|1779C>G|Asn593Lys
NC_045512.2	2045	nsp2 (807-2720)	A|T|protein_coding|missense_variant|MODERATE|1780A>T|Asn594Tyr
NC_045512.2	2047	nsp2 (807-2720)	T|C|protein_coding|synonymous_variant|LOW|1782T>C|Asn594Asn
NC_045512.2	2048	nsp2 (807-2720)	C|T|protein_coding|synonymous_variant|LOW|1783C>T|Leu595Leu
NC_045512.2	2051	nsp2 (807-2720)	G|A|protein_coding|missense_variant|MODERATE|1786G>A|Val596Ile
NC_045512.2	2054	nsp2 (807-2720)	G|A|protein_coding|missense_variant|MODERATE|1789G>A|Val597Ile
NC_045512.2	2056	nsp2 (807-2720)	A|G|protein_coding|synonymous_variant|LOW|1791A>G|Val597Val
NC_045512.2	2057	nsp2 (807-2720)	A|G|protein_coding|missense_variant|MODERATE|1792A>G|Met598Val
NC_045512.2	2058	nsp2 (807-2720)	T|C|protein_coding|missense_variant|MODERATE|1793T>C|Met598Thr
NC_045512.2	2059	nsp2 (807-2720)	G|T|protein_coding|missense_variant|MODERATE|1794G>T|Met598Ile
NC_045512.2	2061	nsp2 (807-2720)	C|T|protein_coding|missense_variant|MODERATE|1796C>T|Ala599Val
NC_045512.2	2062	nsp2 (807-2720)	C|T|protein_coding|synonymous_variant|LOW|1797C>T|Ala599Ala
NC_045512.2	2063	nsp2 (807-2720)	T|A|protein_coding|missense_variant|MODERATE|1798T>A|Tyr600Asn
NC_045512.2	2065	nsp2 (807-2720)	C|T|protein_coding|synonymous_variant|LOW|1800C>T|Tyr600Tyr
NC_045512.2	2066	nsp2 (807-2720)	A|G|protein_coding|missense_variant|MODERATE|1801A>G|Ile601Val
NC_045512.2	2068	nsp2 (807-2720)	T|C|protein_coding|synonymous_variant|LOW|1803T>C|Ile601Ile
NC_045512.2	2069	nsp2 (807-2720)	A|G|protein_coding|missense_variant|MODERATE|1804A>G|Thr602Ala
NC_045512.2	2075	nsp2 (807-2720)	G|A|protein_coding|missense_variant|MODERATE|1810G>A|Gly604Ser
NC_045512.2	2076	nsp2 (807-2720)	G|A|protein_coding|missense_variant|MODERATE|1811G>A|Gly604Asp
NC_045512.2	2077	nsp2 (807-2720)	T|C|protein_coding|synonymous_variant|LOW|1812T>C|Gly604Gly
NC_045512.2	2078	nsp2 (807-2720)	G|A|protein_coding|missense_variant|MODERATE|1813G>A|Val605Ile
NC_045512.2	2081	nsp2 (807-2720)	G|T|protein_coding|missense_variant|MODERATE|1816G>T|Val606Phe
NC_045512.2	2083	nsp2 (807-2720)	T|G|protein_coding|synonymous_variant|LOW|1818T>G|Val606Val
NC_045512.2	2084	nsp2 (807-2720)	C|T|protein_coding|stop_gained|HIGH|1819C>T|Gln607*
NC_045512.2	2086	nsp2 (807-2720)	G|T|protein_coding|missense_variant|MODERATE|1821G>T|Gln607His
NC_045512.2	2087	nsp2 (807-2720)	T|C|protein_coding|synonymous_variant|LOW|1822T>C|Leu608Leu
NC_045512.2	2091	nsp2 (807-2720)	C|T|protein_coding|missense_variant|MODERATE|1826C>T|Thr609Ile
NC_045512.2	2092	nsp2 (807-2720)	T|C|protein_coding|synonymous_variant|LOW|1827T>C|Thr609Thr
NC_045512.2	2094	nsp2 (807-2720)	C|T|protein_coding|missense_variant|MODERATE|1829C>T|Ser610Leu
NC_045512.2	2095	nsp2 (807-2720)	G|T|protein_coding|synonymous_variant|LOW|1830G>T|Ser610Ser
NC_045512.2	2100	nsp2 (807-2720)	G|T|protein_coding|missense_variant|MODERATE|1835G>T|Trp612Leu
NC_045512.2	2102	nsp2 (807-2720)	C|T|protein_coding|synonymous_variant|LOW|1837C>T|Leu613Leu
NC_045512.2	2104	nsp2 (807-2720)	A|G|protein_coding|synonymous_variant|LOW|1839A>G|Leu613Leu
NC_045512.2	2106	nsp2 (807-2720)	C|T|protein_coding|missense_variant|MODERATE|1841C>T|Thr614Ile
NC_045512.2	2108	nsp2 (807-2720)	A|G|protein_coding|missense_variant|MODERATE|1843A>G|Asn615Asp
NC_045512.2	2109	nsp2 (807-2720)	A|G|protein_coding|missense_variant|MODERATE|1844A>G|Asn615Ser
NC_045512.2	2110	nsp2 (807-2720)	C|T|protein_coding|synonymous_variant|LOW|1845C>T|Asn615Asn
NC_045512.2	2111	nsp2 (807-2720)	A|T|protein_coding|missense_variant|MODERATE|1846A>T|Ile616Phe
NC_045512.2	2112	nsp2 (807-2720)	T|C|protein_coding|missense_variant|MODERATE|1847T>C|Ile616Thr
NC_045512.2	2113	nsp2 (807-2720)	C|T|protein_coding|synonymous_variant|LOW|1848C>T|Ile616Ile
NC_045512.2	2114	nsp2 (807-2720)	T|C|protein_coding|missense_variant|MODERATE|1849T>C|Phe617Leu
NC_045512.2	2116	nsp2 (807-2720)	T|G|protein_coding|missense_variant|MODERATE|1851T>G|Phe617Leu
NC_045512.2	2117	nsp2 (807-2720)	G|T|protein_coding|missense_variant|MODERATE|1852G>T|Gly618Cys
NC_045512.2	2120	nsp2 (807-2720)	A|T|protein_coding|missense_variant|MODERATE|1855A>T|Thr619Ser
NC_045512.2	2124	nsp2 (807-2720)	T|C|protein_coding|missense_variant|MODERATE|1859T>C|Val620Ala
NC_045512.2	2125	nsp2 (807-2720)	T|C|protein_coding|synonymous_variant|LOW|1860T>C|Val620Val
NC_045512.2	2126	nsp2 (807-2720)	T|C|protein_coding|missense_variant|MODERATE|1861T>C|Tyr621His
NC_045512.2	2127	nsp2 (807-2720)	A|G|protein_coding|missense_variant|MODERATE|1862A>G|Tyr621Cys
NC_045512.2	2128	nsp2 (807-2720)	T|C|protein_coding|synonymous_variant|LOW|1863T>C|Tyr621Tyr
NC_045512.2	2133	nsp2 (807-2720)	A|G|protein_coding|missense_variant|MODERATE|1868A>G|Lys623Arg
NC_045512.2	2135	nsp2 (807-2720)	C|A|protein_coding|missense_variant|MODERATE|1870C>A|Leu624Ile
NC_045512.2	2137	nsp2 (807-2720)	C|T|protein_coding|synonymous_variant|LOW|1872C>T|Leu624Leu
NC_045512.2	2138	nsp2 (807-2720)	A|G|protein_coding|missense_variant|MODERATE|1873A>G|Lys625Glu
NC_045512.2	2139	nsp2 (807-2720)	A|C|protein_coding|missense_variant|MODERATE|1874A>C|Lys625Thr
NC_045512.2	2140	nsp2 (807-2720)	A|G|protein_coding|synonymous_variant|LOW|1875A>G|Lys625Lys
NC_045512.2	2141	nsp2 (807-2720)	C|T|protein_coding|missense_variant|MODERATE|1876C>T|Pro626Ser
NC_045512.2	2142	nsp2 (807-2720)	C|T|protein_coding|missense_variant|MODERATE|1877C>T|Pro626Leu
NC_045512.2	2143	nsp2 (807-2720)	C|T|protein_coding|synonymous_variant|LOW|1878C>T|Pro626Pro
NC_045512.2	2144	nsp2 (807-2720)	G|T|protein_coding|missense_variant|MODERATE|1879G>T|Val627Phe
NC_045512.2	2145	nsp2 (807-2720)	T|C|protein_coding|missense_variant|MODERATE|1880T>C|Val627Ala
NC_045512.2	2146	nsp2 (807-2720)	C|T|protein_coding|synonymous_variant|LOW|1881C>T|Val627Val
NC_045512.2	2147	nsp2 (807-2720)	C|T|protein_coding|missense_variant|MODERATE|1882C>T|Leu628Phe
NC_045512.2	2149	nsp2 (807-2720)	T|C|protein_coding|synonymous_variant|LOW|1884T>C|Leu628Leu
NC_045512.2	2151	nsp2 (807-2720)	A|G|protein_coding|missense_variant|MODERATE|1886A>G|Asp629Gly
NC_045512.2	2152	nsp2 (807-2720)	T|C|protein_coding|synonymous_variant|LOW|1887T>C|Asp629Asp
NC_045512.2	2153	nsp2 (807-2720)	T|C|protein_coding|missense_variant|MODERATE|1888T>C|Trp630Arg
NC_045512.2	2155	nsp2 (807-2720)	G|T|protein_coding|missense_variant|MODERATE|1890G>T|Trp630Cys
NC_045512.2	2156	nsp2 (807-2720)	C|T|protein_coding|missense_variant|MODERATE|1891C>T|Leu631Phe
NC_045512.2	2158	nsp2 (807-2720)	T|C|protein_coding|synonymous_variant|LOW|1893T>C|Leu631Leu
NC_045512.2	2160	nsp2 (807-2720)	A|G|protein_coding|missense_variant|MODERATE|1895A>G|Glu632Gly
NC_045512.2	2161	nsp2 (807-2720)	A|G|protein_coding|synonymous_variant|LOW|1896A>G|Glu632Glu
NC_045512.2	2162	nsp2 (807-2720)	G|T|protein_coding|stop_gained|HIGH|1897G>T|Glu633*
NC_045512.2	2164	nsp2 (807-2720)	G|A|protein_coding|synonymous_variant|LOW|1899G>A|Glu633Glu
NC_045512.2	2165	nsp2 (807-2720)	A|G|protein_coding|missense_variant|MODERATE|1900A>G|Lys634Glu
NC_045512.2	2167	nsp2 (807-2720)	G|T|protein_coding|missense_variant|MODERATE|1902G>T|Lys634Asn
NC_045512.2	2169	nsp2 (807-2720)	T|C|protein_coding|missense_variant|MODERATE|1904T>C|Phe635Ser
NC_045512.2	2170	nsp2 (807-2720)	T|A|protein_coding|missense_variant|MODERATE|1905T>A|Phe635Leu
NC_045512.2	2173	nsp2 (807-2720)	G|A|protein_coding|synonymous_variant|LOW|1908G>A|Lys636Lys
NC_045512.2	2174	nsp2 (807-2720)	G|A|protein_coding|missense_variant|MODERATE|1909G>A|Glu637Lys
NC_045512.2	2176	nsp2 (807-2720)	A|C|protein_coding|missense_variant|MODERATE|1911A>C|Glu637Asp
NC_045512.2	2180	nsp2 (807-2720)	G|A|protein_coding|missense_variant|MODERATE|1915G>A|Val639Ile
NC_045512.2	2182	nsp2 (807-2720)	A|G|protein_coding|synonymous_variant|LOW|1917A>G|Val639Val
NC_045512.2	2184	nsp2 (807-2720)	A|G|protein_coding|missense_variant|MODERATE|1919A>G|Glu640Gly
NC_045512.2	2185	nsp2 (807-2720)	G|A|protein_coding|synonymous_variant|LOW|1920G>A|Glu640Glu
NC_045512.2	2186	nsp2 (807-2720)	T|G|protein_coding|missense_variant|MODERATE|1921T>G|Phe641Val
NC_045512.2	2187	nsp2 (807-2720)	T|G|protein_coding|missense_variant|MODERATE|1922T>G|Phe641Cys
NC_045512.2	2189	nsp2 (807-2720)	C|T|protein_coding|missense_variant|MODERATE|1924C>T|Leu642Phe
NC_045512.2	2190	nsp2 (807-2720)	T|A|protein_coding|missense_variant|MODERATE|1925T>A|Leu642His
NC_045512.2	2191	nsp2 (807-2720)	T|A|protein_coding|synonymous_variant|LOW|1926T>A|Leu642Leu
NC_045512.2	2193	nsp2 (807-2720)	G|A|protein_coding|missense_variant|MODERATE|1928G>A|Arg643Lys
NC_045512.2	2194	nsp2 (807-2720)	A|G|protein_coding|synonymous_variant|LOW|1929A>G|Arg643Arg
NC_045512.2	2196	nsp2 (807-2720)	A|C|protein_coding|missense_variant|MODERATE|1931A>C|Asp644Ala
NC_045512.2	2197	nsp2 (807-2720)	C|T|protein_coding|synonymous_variant|LOW|1932C>T|Asp644Asp
NC_045512.2	2198	nsp2 (807-2720)	G|A|protein_coding|missense_variant|MODERATE|1933G>A|Gly645Ser
NC_045512.2	2200	nsp2 (807-2720)	T|C|protein_coding|synonymous_variant|LOW|1935T>C|Gly645Gly
NC_045512.2	2201	nsp2 (807-2720)	T|A|protein_coding|missense_variant|MODERATE|1936T>A|Trp646Arg
NC_045512.2	2202	nsp2 (807-2720)	G|T|protein_coding|missense_variant|MODERATE|1937G>T|Trp646Leu
NC_045512.2	2203	nsp2 (807-2720)	G|T|protein_coding|missense_variant|MODERATE|1938G>T|Trp646Cys
NC_045512.2	2205	nsp2 (807-2720)	A|G|protein_coding|missense_variant|MODERATE|1940A>G|Glu647Gly
NC_045512.2	2206	nsp2 (807-2720)	A|C|protein_coding|missense_variant|MODERATE|1941A>C|Glu647Asp
NC_045512.2	2207	nsp2 (807-2720)	A|G|protein_coding|missense_variant|MODERATE|1942A>G|Ile648Val
NC_045512.2	2210	nsp2 (807-2720)	G|T|protein_coding|missense_variant|MODERATE|1945G>T|Val649Phe
NC_045512.2	2211	nsp2 (807-2720)	T|C|protein_coding|missense_variant|MODERATE|1946T>C|Val649Ala
NC_045512.2	2215	nsp2 (807-2720)	A|G|protein_coding|synonymous_variant|LOW|1950A>G|Lys650Lys
NC_045512.2	2217	nsp2 (807-2720)	T|C|protein_coding|missense_variant|MODERATE|1952T>C|Phe651Ser
NC_045512.2	2218	nsp2 (807-2720)	T|C|protein_coding|synonymous_variant|LOW|1953T>C|Phe651Phe
NC_045512.2	2219	nsp2 (807-2720)	A|G|protein_coding|missense_variant|MODERATE|1954A>G|Ile652Val
NC_045512.2	2222	nsp2 (807-2720)	T|C|protein_coding|missense_variant|MODERATE|1957T>C|Ser653Pro
NC_045512.2	2226	nsp2 (807-2720)	C|A|protein_coding|missense_variant|MODERATE|1961C>A|Thr654Asn
NC_045512.2	2227	nsp2 (807-2720)	C|T|protein_coding|synonymous_variant|LOW|1962C>T|Thr654Thr
NC_045512.2	2228	nsp2 (807-2720)	T|G|protein_coding|missense_variant|MODERATE|1963T>G|Cys655Gly
NC_045512.2	2229	nsp2 (807-2720)	G|A|protein_coding|missense_variant|MODERATE|1964G>A|Cys655Tyr
NC_045512.2	2230	nsp2 (807-2720)	T|C|protein_coding|synonymous_variant|LOW|1965T>C|Cys655Cys
NC_045512.2	2231	nsp2 (807-2720)	G|T|protein_coding|missense_variant|MODERATE|1966G>T|Ala656Ser
NC_045512.2	2232	nsp2 (807-2720)	C|T|protein_coding|missense_variant|MODERATE|1967C>T|Ala656Val
NC_045512.2	2233	nsp2 (807-2720)	T|C|protein_coding|synonymous_variant|LOW|1968T>C|Ala656Ala
NC_045512.2	2235	nsp2 (807-2720)	G|A|protein_coding|missense_variant|MODERATE|1970G>A|Cys657Tyr
NC_045512.2	2236	nsp2 (807-2720)	T|A|protein_coding|stop_gained|HIGH|1971T>A|Cys657*
NC_045512.2	2237	nsp2 (807-2720)	G|A|protein_coding|missense_variant|MODERATE|1972G>A|Glu658Lys
NC_045512.2	2238	nsp2 (807-2720)	A|C|protein_coding|missense_variant|MODERATE|1973A>C|Glu658Ala
NC_045512.2	2239	nsp2 (807-2720)	A|G|protein_coding|synonymous_variant|LOW|1974A>G|Glu658Glu
NC_045512.2	2240	nsp2 (807-2720)	A|G|protein_coding|missense_variant|MODERATE|1975A>G|Ile659Val
NC_045512.2	2243	nsp2 (807-2720)	G|A|protein_coding|missense_variant|MODERATE|1978G>A|Val660Ile
NC_045512.2	2244	nsp2 (807-2720)	T|C|protein_coding|missense_variant|MODERATE|1979T>C|Val660Ala
NC_045512.2	2245	nsp2 (807-2720)	C|T|protein_coding|synonymous_variant|LOW|1980C>T|Val660Val
NC_045512.2	2246	nsp2 (807-2720)	G|A|protein_coding|missense_variant|MODERATE|1981G>A|Gly661Ser
NC_045512.2	2249	nsp2 (807-2720)	G|A|protein_coding|missense_variant|MODERATE|1984G>A|Gly662Arg
NC_045512.2	2250	nsp2 (807-2720)	G|A|protein_coding|missense_variant|MODERATE|1985G>A|Gly662Glu
NC_045512.2	2251	nsp2 (807-2720)	A|G|protein_coding|synonymous_variant|LOW|1986A>G|Gly662Gly
NC_045512.2	2252	nsp2 (807-2720)	C|A|protein_coding|missense_variant|MODERATE|1987C>A|Gln663Lys
NC_045512.2	2253	nsp2 (807-2720)	A|G|protein_coding|missense_variant|MODERATE|1988A>G|Gln663Arg
NC_045512.2	2254	nsp2 (807-2720)	A|G|protein_coding|synonymous_variant|LOW|1989A>G|Gln663Gln
NC_045512.2	2256	nsp2 (807-2720)	T|A|protein_coding|missense_variant|MODERATE|1991T>A|Ile664Asn
NC_045512.2	2258	nsp2 (807-2720)	G|A|protein_coding|missense_variant|MODERATE|1993G>A|Val665Ile
NC_045512.2	2260	nsp2 (807-2720)	C|T|protein_coding|synonymous_variant|LOW|1995C>T|Val665Val
NC_045512.2	2262	nsp2 (807-2720)	C|T|protein_coding|missense_variant|MODERATE|1997C>T|Thr666Ile
NC_045512.2	2263	nsp2 (807-2720)	C|T|protein_coding|synonymous_variant|LOW|1998C>T|Thr666Thr
NC_045512.2	2264	nsp2 (807-2720)	T|C|protein_coding|missense_variant|MODERATE|1999T>C|Cys667Arg
NC_045512.2	2265	nsp2 (807-2720)	G|A|protein_coding|missense_variant|MODERATE|2000G>A|Cys667Tyr
NC_045512.2	2266	nsp2 (807-2720)	T|C|protein_coding|synonymous_variant|LOW|2001T>C|Cys667Cys
NC_045512.2	2269	nsp2 (807-2720)	A|T|protein_coding|synonymous_variant|LOW|2004A>T|Ala668Ala
NC_045512.2	2270	nsp2 (807-2720)	A|G|protein_coding|missense_variant|MODERATE|2005A>G|Lys669Glu
NC_045512.2	2272	nsp2 (807-2720)	G|A|protein_coding|synonymous_variant|LOW|2007G>A|Lys669Lys
NC_045512.2	2273	nsp2 (807-2720)	G|A|protein_coding|missense_variant|MODERATE|2008G>A|Glu670Lys
NC_045512.2	2274	nsp2 (807-2720)	A|G|protein_coding|missense_variant|MODERATE|2009A>G|Glu670Gly
NC_045512.2	2275	nsp2 (807-2720)	A|G|protein_coding|synonymous_variant|LOW|2010A>G|Glu670Glu
NC_045512.2	2276	nsp2 (807-2720)	A|G|protein_coding|missense_variant|MODERATE|2011A>G|Ile671Val
NC_045512.2	2277	nsp2 (807-2720)	T|C|protein_coding|missense_variant|MODERATE|2012T>C|Ile671Thr
NC_045512.2	2278	nsp2 (807-2720)	T|C|protein_coding|synonymous_variant|LOW|2013T>C|Ile671Ile
NC_045512.2	2280	nsp2 (807-2720)	A|G|protein_coding|missense_variant|MODERATE|2015A>G|Lys672Arg
NC_045512.2	2281	nsp2 (807-2720)	G|A|protein_coding|synonymous_variant|LOW|2016G>A|Lys672Lys
NC_045512.2	2282	nsp2 (807-2720)	G|A|protein_coding|missense_variant|MODERATE|2017G>A|Glu673Lys
NC_045512.2	2283	nsp2 (807-2720)	A|C|protein_coding|missense_variant|MODERATE|2018A>C|Glu673Ala
NC_045512.2	2284	nsp2 (807-2720)	G|A|protein_coding|synonymous_variant|LOW|2019G>A|Glu673Glu
NC_045512.2	2285	nsp2 (807-2720)	A|G|protein_coding|missense_variant|MODERATE|2020A>G|Ser674Gly
NC_045512.2	2286	nsp2 (807-2720)	G|A|protein_coding|missense_variant|MODERATE|2021G>A|Ser674Asn
NC_045512.2	2287	nsp2 (807-2720)	T|C|protein_coding|synonymous_variant|LOW|2022T>C|Ser674Ser
NC_045512.2	2288	nsp2 (807-2720)	G|A|protein_coding|missense_variant|MODERATE|2023G>A|Val675Ile
NC_045512.2	2289	nsp2 (807-2720)	T|C|protein_coding|missense_variant|MODERATE|2024T>C|Val675Ala
NC_045512.2	2290	nsp2 (807-2720)	T|G|protein_coding|synonymous_variant|LOW|2025T>G|Val675Val
NC_045512.2	2291	nsp2 (807-2720)	C|T|protein_coding|stop_gained|HIGH|2026C>T|Gln676*
NC_045512.2	2292	nsp2 (807-2720)	A|C|protein_coding|missense_variant|MODERATE|2027A>C|Gln676Pro
NC_045512.2	2293	nsp2 (807-2720)	G|T|protein_coding|missense_variant|MODERATE|2028G>T|Gln676His
NC_045512.2	2295	nsp2 (807-2720)	C|T|protein_coding|missense_variant|MODERATE|2030C>T|Thr677Ile
NC_045512.2	2298	nsp2 (807-2720)	T|C|protein_coding|missense_variant|MODERATE|2033T>C|Phe678Ser
NC_045512.2	2299	nsp2 (807-2720)	C|T|protein_coding|synonymous_variant|LOW|2034C>T|Phe678Phe
NC_045512.2	2303	nsp2 (807-2720)	A|G|protein_coding|missense_variant|MODERATE|2038A>G|Lys680Glu
NC_045512.2	2304	nsp2 (807-2720)	A|G|protein_coding|missense_variant|MODERATE|2039A>G|Lys680Arg
NC_045512.2	2305	nsp2 (807-2720)	G|T|protein_coding|missense_variant|MODERATE|2040G>T|Lys680Asn
NC_045512.2	2306	nsp2 (807-2720)	C|T|protein_coding|missense_variant|MODERATE|2041C>T|Leu681Phe
NC_045512.2	2308	nsp2 (807-2720)	T|C|protein_coding|synonymous_variant|LOW|2043T>C|Leu681Leu
NC_045512.2	2309	nsp2 (807-2720)	G|A|protein_coding|missense_variant|MODERATE|2044G>A|Val682Ile
NC_045512.2	2310	nsp2 (807-2720)	T|C|protein_coding|missense_variant|MODERATE|2045T>C|Val682Ala
NC_045512.2	2311	nsp2 (807-2720)	A|G|protein_coding|synonymous_variant|LOW|2046A>G|Val682Val
NC_045512.2	2314	nsp2 (807-2720)	T|C|protein_coding|synonymous_variant|LOW|2049T>C|Asn683Asn
NC_045512.2	2317	nsp2 (807-2720)	A|G|protein_coding|synonymous_variant|LOW|2052A>G|Lys684Lys
NC_045512.2	2321	nsp2 (807-2720)	T|C|protein_coding|synonymous_variant|LOW|2056T>C|Leu686Leu
NC_045512.2	2322	nsp2 (807-2720)	T|C|protein_coding|missense_variant|MODERATE|2057T>C|Leu686Ser
NC_045512.2	2323	nsp2 (807-2720)	G|C|protein_coding|missense_variant|MODERATE|2058G>C|Leu686Phe
NC_045512.2	2324	nsp2 (807-2720)	G|A|protein_coding|missense_variant|MODERATE|2059G>A|Ala687Thr
NC_045512.2	2325	nsp2 (807-2720)	C|T|protein_coding|missense_variant|MODERATE|2060C>T|Ala687Val
NC_045512.2	2326	nsp2 (807-2720)	T|A|protein_coding|synonymous_variant|LOW|2061T>A|Ala687Ala
NC_045512.2	2329	nsp2 (807-2720)	G|A|protein_coding|synonymous_variant|LOW|2064G>A|Leu688Leu
NC_045512.2	2330	nsp2 (807-2720)	T|G|protein_coding|missense_variant|MODERATE|2065T>G|Cys689Gly
NC_045512.2	2334	nsp2 (807-2720)	C|T|protein_coding|missense_variant|MODERATE|2069C>T|Ala690Val
NC_045512.2	2335	nsp2 (807-2720)	T|C|protein_coding|synonymous_variant|LOW|2070T>C|Ala690Ala
NC_045512.2	2339	nsp2 (807-2720)	T|A|protein_coding|missense_variant|MODERATE|2074T>A|Ser692Thr
NC_045512.2	2340	nsp2 (807-2720)	C|T|protein_coding|missense_variant|MODERATE|2075C>T|Ser692Phe
NC_045512.2	2341	nsp2 (807-2720)	T|C|protein_coding|synonymous_variant|LOW|2076T>C|Ser692Ser
NC_045512.2	2342	nsp2 (807-2720)	A|G|protein_coding|missense_variant|MODERATE|2077A>G|Ile693Val
NC_045512.2	2343	nsp2 (807-2720)	T|C|protein_coding|missense_variant|MODERATE|2078T>C|Ile693Thr
NC_045512.2	2345	nsp2 (807-2720)	A|G|protein_coding|missense_variant|MODERATE|2080A>G|Ile694Val
NC_045512.2	2348	nsp2 (807-2720)	A|G|protein_coding|missense_variant|MODERATE|2083A>G|Ile695Val
NC_045512.2	2350	nsp2 (807-2720)	T|A|protein_coding|synonymous_variant|LOW|2085T>A|Ile695Ile
NC_045512.2	2351	nsp2 (807-2720)	G|A|protein_coding|missense_variant|MODERATE|2086G>A|Gly696Ser
NC_045512.2	2354	nsp2 (807-2720)	G|A|protein_coding|missense_variant|MODERATE|2089G>A|Gly697Arg
NC_045512.2	2356	nsp2 (807-2720)	A|C|protein_coding|synonymous_variant|LOW|2091A>C|Gly697Gly
NC_045512.2	2357	nsp2 (807-2720)	G|A|protein_coding|missense_variant|MODERATE|2092G>A|Ala698Thr
NC_045512.2	2358	nsp2 (807-2720)	C|T|protein_coding|missense_variant|MODERATE|2093C>T|Ala698Val
NC_045512.2	2361	nsp2 (807-2720)	A|G|protein_coding|missense_variant|MODERATE|2096A>G|Lys699Arg
NC_045512.2	2363	nsp2 (807-2720)	C|T|protein_coding|missense_variant|MODERATE|2098C>T|Leu700Phe
NC_045512.2	2368	nsp2 (807-2720)	A|T|protein_coding|missense_variant|MODERATE|2103A>T|Lys701Asn
NC_045512.2	2369	nsp2 (807-2720)	G|A|protein_coding|missense_variant|MODERATE|2104G>A|Ala702Thr
NC_045512.2	2370	nsp2 (807-2720)	C|T|protein_coding|missense_variant|MODERATE|2105C>T|Ala702Val
NC_045512.2	2371	nsp2 (807-2720)	C|T|protein_coding|synonymous_variant|LOW|2106C>T|Ala702Ala
NC_045512.2	2372	nsp2 (807-2720)	T|G|protein_coding|missense_variant|MODERATE|2107T>G|Leu703Val
NC_045512.2	2376	nsp2 (807-2720)	A|G|protein_coding|missense_variant|MODERATE|2111A>G|Asn704Ser
NC_045512.2	2380	nsp2 (807-2720)	A|G|protein_coding|synonymous_variant|LOW|2115A>G|Leu705Leu
NC_045512.2	2381	nsp2 (807-2720)	G|T|protein_coding|missense_variant|MODERATE|2116G>T|Gly706Cys
NC_045512.2	2382	nsp2 (807-2720)	G|A|protein_coding|missense_variant|MODERATE|2117G>A|Gly706Asp
NC_045512.2	2383	nsp2 (807-2720)	T|G|protein_coding|synonymous_variant|LOW|2118T>G|Gly706Gly
NC_045512.2	2385	nsp2 (807-2720)	A|G|protein_coding|missense_variant|MODERATE|2120A>G|Glu707Gly
NC_045512.2	2388	nsp2 (807-2720)	C|T|protein_coding|missense_variant|MODERATE|2123C>T|Thr708Ile
NC_045512.2	2389	nsp2 (807-2720)	A|G|protein_coding|synonymous_variant|LOW|2124A>G|Thr708Thr
NC_045512.2	2390	nsp2 (807-2720)	T|C|protein_coding|missense_variant|MODERATE|2125T>C|Phe709Leu
NC_045512.2	2393	nsp2 (807-2720)	G|A|protein_coding|missense_variant|MODERATE|2128G>A|Val710Ile
NC_045512.2	2394	nsp2 (807-2720)	T|C|protein_coding|missense_variant|MODERATE|2129T>C|Val710Ala
NC_045512.2	2395	nsp2 (807-2720)	C|T|protein_coding|synonymous_variant|LOW|2130C>T|Val710Val
NC_045512.2	2396	nsp2 (807-2720)	A|G|protein_coding|missense_variant|MODERATE|2131A>G|Thr711Ala
NC_045512.2	2397	nsp2 (807-2720)	C|T|protein_coding|missense_variant|MODERATE|2132C>T|Thr711Met
NC_045512.2	2398	nsp2 (807-2720)	G|A|protein_coding|synonymous_variant|LOW|2133G>A|Thr711Thr
NC_045512.2	2399	nsp2 (807-2720)	C|T|protein_coding|missense_variant|MODERATE|2134C>T|His712Tyr
NC_045512.2	2401	nsp2 (807-2720)	C|T|protein_coding|synonymous_variant|LOW|2136C>T|His712His
NC_045512.2	2402	nsp2 (807-2720)	T|A|protein_coding|missense_variant|MODERATE|2137T>A|Ser713Thr
NC_045512.2	2404	nsp2 (807-2720)	A|T|protein_coding|synonymous_variant|LOW|2139A>T|Ser713Ser
NC_045512.2	2406	nsp2 (807-2720)	A|G|protein_coding|missense_variant|MODERATE|2141A>G|Lys714Arg
NC_045512.2	2407	nsp2 (807-2720)	G|A|protein_coding|synonymous_variant|LOW|2142G>A|Lys714Lys
NC_045512.2	2410	nsp2 (807-2720)	A|G|protein_coding|synonymous_variant|LOW|2145A>G|Gly715Gly
NC_045512.2	2413	nsp2 (807-2720)	G|A|protein_coding|synonymous_variant|LOW|2148G>A|Leu716Leu
NC_045512.2	2416	nsp2 (807-2720)	C|T|protein_coding|synonymous_variant|LOW|2151C>T|Tyr717Tyr
NC_045512.2	2418	nsp2 (807-2720)	G|A|protein_coding|missense_variant|MODERATE|2153G>A|Arg718Lys
NC_045512.2	2420	nsp2 (807-2720)	A|C|protein_coding|missense_variant|MODERATE|2155A>C|Lys719Gln
NC_045512.2	2422	nsp2 (807-2720)	G|A|protein_coding|synonymous_variant|LOW|2157G>A|Lys719Lys
NC_045512.2	2424	nsp2 (807-2720)	G|A|protein_coding|missense_variant|MODERATE|2159G>A|Cys720Tyr
NC_045512.2	2428	nsp2 (807-2720)	T|C|protein_coding|synonymous_variant|LOW|2163T>C|Val721Val
NC_045512.2	2430	nsp2 (807-2720)	A|C|protein_coding|missense_variant|MODERATE|2165A>C|Lys722Thr
NC_045512.2	2431	nsp2 (807-2720)	A|G|protein_coding|synonymous_variant|LOW|2166A>G|Lys722Lys
NC_045512.2	2432	nsp2 (807-2720)	T|C|protein_coding|missense_variant|MODERATE|2167T>C|Ser723Pro
NC_045512.2	2433	nsp2 (807-2720)	C|A|protein_coding|missense_variant|MODERATE|2168C>A|Ser723Tyr
NC_045512.2	2434	nsp2 (807-2720)	C|T|protein_coding|synonymous_variant|LOW|2169C>T|Ser723Ser
NC_045512.2	2436	nsp2 (807-2720)	G|T|protein_coding|missense_variant|MODERATE|2171G>T|Arg724Ile
NC_045512.2	2437	nsp2 (807-2720)	A|C|protein_coding|missense_variant|MODERATE|2172A>C|Arg724Ser
NC_045512.2	2439	nsp2 (807-2720)	A|G|protein_coding|missense_variant|MODERATE|2174A>G|Glu725Gly
NC_045512.2	2440	nsp2 (807-2720)	A|G|protein_coding|synonymous_variant|LOW|2175A>G|Glu725Glu
NC_045512.2	2441	nsp2 (807-2720)	G|A|protein_coding|missense_variant|MODERATE|2176G>A|Glu726Lys
NC_045512.2	2443	nsp2 (807-2720)	A|G|protein_coding|synonymous_variant|LOW|2178A>G|Glu726Glu
NC_045512.2	2444	nsp2 (807-2720)	A|G|protein_coding|missense_variant|MODERATE|2179A>G|Thr727Ala
NC_045512.2	2445	nsp2 (807-2720)	C|T|protein_coding|missense_variant|MODERATE|2180C>T|Thr727Ile
NC_045512.2	2446	nsp2 (807-2720)	T|A|protein_coding|synonymous_variant|LOW|2181T>A|Thr727Thr
NC_045512.2	2447	nsp2 (807-2720)	G|A|protein_coding|missense_variant|MODERATE|2182G>A|Gly728Ser
NC_045512.2	2448	nsp2 (807-2720)	G|A|protein_coding|missense_variant|MODERATE|2183G>A|Gly728Asp
NC_045512.2	2449	nsp2 (807-2720)	C|T|protein_coding|synonymous_variant|LOW|2184C>T|Gly728Gly
NC_045512.2	2450	nsp2 (807-2720)	C|T|protein_coding|synonymous_variant|LOW|2185C>T|Leu729Leu
NC_045512.2	2451	nsp2 (807-2720)	T|A|protein_coding|missense_variant|MODERATE|2186T>A|Leu729Gln
NC_045512.2	2453	nsp2 (807-2720)	C|T|protein_coding|missense_variant|MODERATE|2188C>T|Leu730Phe
NC_045512.2	2454	nsp2 (807-2720)	T|C|protein_coding|missense_variant|MODERATE|2189T>C|Leu730Pro
NC_045512.2	2455	nsp2 (807-2720)	C|T|protein_coding|synonymous_variant|LOW|2190C>T|Leu730Leu
NC_045512.2	2456	nsp2 (807-2720)	A|T|protein_coding|missense_variant|MODERATE|2191A>T|Met731Leu
NC_045512.2	2458	nsp2 (807-2720)	G|T|protein_coding|missense_variant|MODERATE|2193G>T|Met731Ile
NC_045512.2	2459	nsp2 (807-2720)	C|T|protein_coding|missense_variant|MODERATE|2194C>T|Pro732Ser
NC_045512.2	2460	nsp2 (807-2720)	C|A|protein_coding|missense_variant|MODERATE|2195C>A|Pro732His
NC_045512.2	2461	nsp2 (807-2720)	T|A|protein_coding|synonymous_variant|LOW|2196T>A|Pro732Pro
NC_045512.2	2462	nsp2 (807-2720)	C|T|protein_coding|synonymous_variant|LOW|2197C>T|Leu733Leu
NC_045512.2	2465	nsp2 (807-2720)	A|C|protein_coding|missense_variant|MODERATE|2200A>C|Lys734Gln
NC_045512.2	2466	nsp2 (807-2720)	A|G|protein_coding|missense_variant|MODERATE|2201A>G|Lys734Arg
NC_045512.2	2467	nsp2 (807-2720)	A|C|protein_coding|missense_variant|MODERATE|2202A>C|Lys734Asn
NC_045512.2	2468	nsp2 (807-2720)	G|A|protein_coding|missense_variant|MODERATE|2203G>A|Ala735Thr
NC_045512.2	2469	nsp2 (807-2720)	C|T|protein_coding|missense_variant|MODERATE|2204C>T|Ala735Val
NC_045512.2	2470	nsp2 (807-2720)	C|T|protein_coding|synonymous_variant|LOW|2205C>T|Ala735Ala
NC_045512.2	2471	nsp2 (807-2720)	C|T|protein_coding|missense_variant|MODERATE|2206C>T|Pro736Ser
NC_045512.2	2475	nsp2 (807-2720)	A|G|protein_coding|missense_variant|MODERATE|2210A>G|Lys737Arg
NC_045512.2	2476	nsp2 (807-2720)	A|G|protein_coding|synonymous_variant|LOW|2211A>G|Lys737Lys
NC_045512.2	2477	nsp2 (807-2720)	G|A|protein_coding|missense_variant|MODERATE|2212G>A|Glu738Lys
NC_045512.2	2480	nsp2 (807-2720)	A|G|protein_coding|missense_variant|MODERATE|2215A>G|Ile739Val
NC_045512.2	2482	nsp2 (807-2720)	T|C|protein_coding|synonymous_variant|LOW|2217T>C|Ile739Ile
NC_045512.2	2484	nsp2 (807-2720)	T|C|protein_coding|missense_variant|MODERATE|2219T>C|Ile740Thr
NC_045512.2	2485	nsp2 (807-2720)	C|T|protein_coding|synonymous_variant|LOW|2220C>T|Ile740Ile
NC_045512.2	2487	nsp2 (807-2720)	T|A|protein_coding|missense_variant|MODERATE|2222T>A|Phe741Tyr
NC_045512.2	2488	nsp2 (807-2720)	C|T|protein_coding|synonymous_variant|LOW|2223C>T|Phe741Phe
NC_045512.2	2489	nsp2 (807-2720)	T|C|protein_coding|synonymous_variant|LOW|2224T>C|Leu742Leu
NC_045512.2	2494	nsp2 (807-2720)	G|A|protein_coding|synonymous_variant|LOW|2229G>A|Glu743Glu
NC_045512.2	2495	nsp2 (807-2720)	G|A|protein_coding|missense_variant|MODERATE|2230G>A|Gly744Arg
NC_045512.2	2497	nsp2 (807-2720)	A|G|protein_coding|synonymous_variant|LOW|2232A>G|Gly744Gly
NC_045512.2	2498	nsp2 (807-2720)	G|A|protein_coding|missense_variant|MODERATE|2233G>A|Glu745Lys
NC_045512.2	2499	nsp2 (807-2720)	A|C|protein_coding|missense_variant|MODERATE|2234A>C|Glu745Ala
NC_045512.2	2500	nsp2 (807-2720)	A|G|protein_coding|synonymous_variant|LOW|2235A>G|Glu745Glu
NC_045512.2	2501	nsp2 (807-2720)	A|G|protein_coding|missense_variant|MODERATE|2236A>G|Thr746Ala
NC_045512.2	2502	nsp2 (807-2720)	C|T|protein_coding|missense_variant|MODERATE|2237C>T|Thr746Ile
NC_045512.2	2504	nsp2 (807-2720)	C|T|protein_coding|missense_variant|MODERATE|2239C>T|Leu747Phe
NC_045512.2	2506	nsp2 (807-2720)	T|C|protein_coding|synonymous_variant|LOW|2241T>C|Leu747Leu
NC_045512.2	2507	nsp2 (807-2720)	C|T|protein_coding|missense_variant|MODERATE|2242C>T|Pro748Ser
NC_045512.2	2508	nsp2 (807-2720)	C|T|protein_coding|missense_variant|MODERATE|2243C>T|Pro748Leu
NC_045512.2	2509	nsp2 (807-2720)	C|T|protein_coding|synonymous_variant|LOW|2244C>T|Pro748Pro
NC_045512.2	2510	nsp2 (807-2720)	A|G|protein_coding|missense_variant|MODERATE|2245A>G|Thr749Ala
NC_045512.2	2511	nsp2 (807-2720)	C|T|protein_coding|missense_variant|MODERATE|2246C>T|Thr749Ile
NC_045512.2	2512	nsp2 (807-2720)	A|C|protein_coding|synonymous_variant|LOW|2247A>C|Thr749Thr
NC_045512.2	2514	nsp2 (807-2720)	A|G|protein_coding|missense_variant|MODERATE|2249A>G|Glu750Gly
NC_045512.2	2516	nsp2 (807-2720)	G|T|protein_coding|missense_variant|MODERATE|2251G>T|Val751Leu
NC_045512.2	2517	nsp2 (807-2720)	T|A|protein_coding|missense_variant|MODERATE|2252T>A|Val751Glu
NC_045512.2	2518	nsp2 (807-2720)	G|T|protein_coding|synonymous_variant|LOW|2253G>T|Val751Val
NC_045512.2	2521	nsp2 (807-2720)	A|T|protein_coding|missense_variant|MODERATE|2256A>T|Leu752Phe
NC_045512.2	2522	nsp2 (807-2720)	A|G|protein_coding|missense_variant|MODERATE|2257A>G|Thr753Ala
NC_045512.2	2523	nsp2 (807-2720)	C|T|protein_coding|missense_variant|MODERATE|2258C>T|Thr753Ile
NC_045512.2	2524	nsp2 (807-2720)	A|G|protein_coding|synonymous_variant|LOW|2259A>G|Thr753Thr
NC_045512.2	2526	nsp2 (807-2720)	A|G|protein_coding|missense_variant|MODERATE|2261A>G|Glu754Gly
NC_045512.2	2527	nsp2 (807-2720)	G|A|protein_coding|synonymous_variant|LOW|2262G>A|Glu754Glu
NC_045512.2	2528	nsp2 (807-2720)	G|A|protein_coding|missense_variant|MODERATE|2263G>A|Glu755Lys
NC_045512.2	2529	nsp2 (807-2720)	A|C|protein_coding|missense_variant|MODERATE|2264A>C|Glu755Ala
NC_045512.2	2531	nsp2 (807-2720)	G|T|protein_coding|missense_variant|MODERATE|2266G>T|Val756Phe
NC_045512.2	2533	nsp2 (807-2720)	T|A|protein_coding|synonymous_variant|LOW|2268T>A|Val756Val
NC_045512.2	2534	nsp2 (807-2720)	G|A|protein_coding|missense_variant|MODERATE|2269G>A|Val757Ile
NC_045512.2	2536	nsp2 (807-2720)	C|T|protein_coding|synonymous_variant|LOW|2271C>T|Val757Val
NC_045512.2	2537	nsp2 (807-2720)	T|G|protein_coding|missense_variant|MODERATE|2272T>G|Leu758Val
NC_045512.2	2542	nsp2 (807-2720)	A|G|protein_coding|synonymous_variant|LOW|2277A>G|Lys759Lys
NC_045512.2	2543	nsp2 (807-2720)	A|G|protein_coding|missense_variant|MODERATE|2278A>G|Thr760Ala
NC_045512.2	2547	nsp2 (807-2720)	G|A|protein_coding|missense_variant|MODERATE|2282G>A|Gly761Asp
NC_045512.2	2548	nsp2 (807-2720)	T|G|protein_coding|synonymous_variant|LOW|2283T>G|Gly761Gly
NC_045512.2	2549	nsp2 (807-2720)	G|A|protein_coding|missense_variant|MODERATE|2284G>A|Asp762Asn
NC_045512.2	2550	nsp2 (807-2720)	A|G|protein_coding|missense_variant|MODERATE|2285A>G|Asp762Gly
NC_045512.2	2551	nsp2 (807-2720)	T|C|protein_coding|synonymous_variant|LOW|2286T>C|Asp762Asp
NC_045512.2	2557	nsp2 (807-2720)	A|G|protein_coding|synonymous_variant|LOW|2292A>G|Gln764Gln
NC_045512.2	2558	nsp2 (807-2720)	C|T|protein_coding|missense_variant|MODERATE|2293C>T|Pro765Ser
NC_045512.2	2559	nsp2 (807-2720)	C|T|protein_coding|missense_variant|MODERATE|2294C>T|Pro765Leu
NC_045512.2	2560	nsp2 (807-2720)	A|G|protein_coding|synonymous_variant|LOW|2295A>G|Pro765Pro
NC_045512.2	2561	nsp2 (807-2720)	T|C|protein_coding|synonymous_variant|LOW|2296T>C|Leu766Leu
NC_045512.2	2563	nsp2 (807-2720)	A|T|protein_coding|missense_variant|MODERATE|2298A>T|Leu766Phe
NC_045512.2	2565	nsp2 (807-2720)	A|G|protein_coding|missense_variant|MODERATE|2300A>G|Glu767Gly
NC_045512.2	2568	nsp2 (807-2720)	A|T|protein_coding|missense_variant|MODERATE|2303A>T|Gln768Leu
NC_045512.2	2570	nsp2 (807-2720)	C|T|protein_coding|missense_variant|MODERATE|2305C>T|Pro769Ser
NC_045512.2	2571	nsp2 (807-2720)	C|T|protein_coding|missense_variant|MODERATE|2306C>T|Pro769Leu
NC_045512.2	2572	nsp2 (807-2720)	T|G|protein_coding|synonymous_variant|LOW|2307T>G|Pro769Pro
NC_045512.2	2574	nsp2 (807-2720)	C|T|protein_coding|missense_variant|MODERATE|2309C>T|Thr770Ile
NC_045512.2	2576	nsp2 (807-2720)	A|T|protein_coding|missense_variant|MODERATE|2311A>T|Ser771Cys
NC_045512.2	2579	nsp2 (807-2720)	G|A|protein_coding|missense_variant|MODERATE|2314G>A|Glu772Lys
NC_045512.2	2581	nsp2 (807-2720)	A|C|protein_coding|missense_variant|MODERATE|2316A>C|Glu772Asp
NC_045512.2	2582	nsp2 (807-2720)	G|A|protein_coding|missense_variant|MODERATE|2317G>A|Ala773Thr
NC_045512.2	2583	nsp2 (807-2720)	C|T|protein_coding|missense_variant|MODERATE|2318C>T|Ala773Val
NC_045512.2	2584	nsp2 (807-2720)	T|A|protein_coding|synonymous_variant|LOW|2319T>A|Ala773Ala
NC_045512.2	2585	nsp2 (807-2720)	G|T|protein_coding|missense_variant|MODERATE|2320G>T|Val774Phe
NC_045512.2	2586	nsp2 (807-2720)	T|C|protein_coding|missense_variant|MODERATE|2321T>C|Val774Ala
NC_045512.2	2587	nsp2 (807-2720)	T|A|protein_coding|synonymous_variant|LOW|2322T>A|Val774Val
NC_045512.2	2588	nsp2 (807-2720)	G|A|protein_coding|missense_variant|MODERATE|2323G>A|Glu775Lys
NC_045512.2	2589	nsp2 (807-2720)	A|G|protein_coding|missense_variant|MODERATE|2324A>G|Glu775Gly
NC_045512.2	2590	nsp2 (807-2720)	A|T|protein_coding|missense_variant|MODERATE|2325A>T|Glu775Asp
NC_045512.2	2591	nsp2 (807-2720)	G|A|protein_coding|missense_variant|MODERATE|2326G>A|Ala776Thr
NC_045512.2	2592	nsp2 (807-2720)	C|T|protein_coding|missense_variant|MODERATE|2327C>T|Ala776Val
NC_045512.2	2593	nsp2 (807-2720)	T|C|protein_coding|synonymous_variant|LOW|2328T>C|Ala776Ala
NC_045512.2	2594	nsp2 (807-2720)	C|T|protein_coding|missense_variant|MODERATE|2329C>T|Pro777Ser
NC_045512.2	2595	nsp2 (807-2720)	C|T|protein_coding|missense_variant|MODERATE|2330C>T|Pro777Leu
NC_045512.2	2596	nsp2 (807-2720)	A|G|protein_coding|synonymous_variant|LOW|2331A>G|Pro777Pro
NC_045512.2	2597	nsp2 (807-2720)	T|C|protein_coding|synonymous_variant|LOW|2332T>C|Leu778Leu
NC_045512.2	2599	nsp2 (807-2720)	G|A|protein_coding|synonymous_variant|LOW|2334G>A|Leu778Leu
NC_045512.2	2600	nsp2 (807-2720)	G|A|protein_coding|missense_variant|MODERATE|2335G>A|Val779Ile
NC_045512.2	2602	nsp2 (807-2720)	T|C|protein_coding|synonymous_variant|LOW|2337T>C|Val779Val
NC_045512.2	2604	nsp2 (807-2720)	G|T|protein_coding|missense_variant|MODERATE|2339G>T|Gly780Val
NC_045512.2	2605	nsp2 (807-2720)	T|C|protein_coding|synonymous_variant|LOW|2340T>C|Gly780Gly
NC_045512.2	2607	nsp2 (807-2720)	C|T|protein_coding|missense_variant|MODERATE|2342C>T|Thr781Ile
NC_045512.2	2609	nsp2 (807-2720)	C|T|protein_coding|missense_variant|MODERATE|2344C>T|Pro782Ser
NC_045512.2	2610	nsp2 (807-2720)	C|T|protein_coding|missense_variant|MODERATE|2345C>T|Pro782Leu
NC_045512.2	2611	nsp2 (807-2720)	A|T|protein_coding|synonymous_variant|LOW|2346A>T|Pro782Pro
NC_045512.2	2612	nsp2 (807-2720)	G|C|protein_coding|missense_variant|MODERATE|2347G>C|Val783Leu
NC_045512.2	2618	nsp2 (807-2720)	A|G|protein_coding|missense_variant|MODERATE|2353A>G|Ile785Val
NC_045512.2	2620	nsp2 (807-2720)	T|C|protein_coding|synonymous_variant|LOW|2355T>C|Ile785Ile
NC_045512.2	2622	nsp2 (807-2720)	A|G|protein_coding|missense_variant|MODERATE|2357A>G|Asn786Ser
NC_045512.2	2623	nsp2 (807-2720)	C|T|protein_coding|synonymous_variant|LOW|2358C>T|Asn786Asn
NC_045512.2	2625	nsp2 (807-2720)	G|A|protein_coding|missense_variant|MODERATE|2360G>A|Gly787Glu
NC_045512.2	2626	nsp2 (807-2720)	G|A|protein_coding|synonymous_variant|LOW|2361G>A|Gly787Gly
NC_045512.2	2627	nsp2 (807-2720)	C|T|protein_coding|missense_variant|MODERATE|2362C>T|Leu788Phe
NC_045512.2	2630	nsp2 (807-2720)	A|G|protein_coding|missense_variant|MODERATE|2365A>G|Met789Val
NC_045512.2	2632	nsp2 (807-2720)	G|T|protein_coding|missense_variant|MODERATE|2367G>T|Met789Ile
NC_045512.2	2633	nsp2 (807-2720)	T|C|protein_coding|synonymous_variant|LOW|2368T>C|Leu790Leu
NC_045512.2	2635	nsp2 (807-2720)	G|A|protein_coding|synonymous_variant|LOW|2370G>A|Leu790Leu
NC_045512.2	2636	nsp2 (807-2720)	C|A|protein_coding|missense_variant|MODERATE|2371C>A|Leu791Ile
NC_045512.2	2638	nsp2 (807-2720)	C|T|protein_coding|synonymous_variant|LOW|2373C>T|Leu791Leu
NC_045512.2	2639	nsp2 (807-2720)	G|A|protein_coding|missense_variant|MODERATE|2374G>A|Glu792Lys
NC_045512.2	2641	nsp2 (807-2720)	A|G|protein_coding|synonymous_variant|LOW|2376A>G|Glu792Glu
NC_045512.2	2644	nsp2 (807-2720)	C|T|protein_coding|synonymous_variant|LOW|2379C>T|Ile793Ile
NC_045512.2	2645	nsp2 (807-2720)	A|G|protein_coding|missense_variant|MODERATE|2380A>G|Lys794Glu
NC_045512.2	2647	nsp2 (807-2720)	A|G|protein_coding|synonymous_variant|LOW|2382A>G|Lys794Lys
NC_045512.2	2650	nsp2 (807-2720)	C|T|protein_coding|synonymous_variant|LOW|2385C>T|Asp795Asp
NC_045512.2	2651	nsp2 (807-2720)	A|G|protein_coding|missense_variant|MODERATE|2386A>G|Thr796Ala
NC_045512.2	2652	nsp2 (807-2720)	C|T|protein_coding|missense_variant|MODERATE|2387C>T|Thr796Ile
NC_045512.2	2653	nsp2 (807-2720)	A|G|protein_coding|synonymous_variant|LOW|2388A>G|Thr796Thr
NC_045512.2	2654	nsp2 (807-2720)	G|A|protein_coding|missense_variant|MODERATE|2389G>A|Glu797Lys
NC_045512.2	2655	nsp2 (807-2720)	A|C|protein_coding|missense_variant|MODERATE|2390A>C|Glu797Ala
NC_045512.2	2659	nsp2 (807-2720)	G|T|protein_coding|missense_variant|MODERATE|2394G>T|Lys798Asn
NC_045512.2	2662	nsp2 (807-2720)	C|T|protein_coding|synonymous_variant|LOW|2397C>T|Tyr799Tyr
NC_045512.2	2664	nsp2 (807-2720)	G|T|protein_coding|missense_variant|MODERATE|2399G>T|Cys800Phe
NC_045512.2	2667	nsp2 (807-2720)	C|T|protein_coding|missense_variant|MODERATE|2402C>T|Ala801Val
NC_045512.2	2668	nsp2 (807-2720)	C|T|protein_coding|synonymous_variant|LOW|2403C>T|Ala801Ala
NC_045512.2	2669	nsp2 (807-2720)	C|T|protein_coding|missense_variant|MODERATE|2404C>T|Leu802Phe
NC_045512.2	2672	nsp2 (807-2720)	G|A|protein_coding|missense_variant|MODERATE|2407G>A|Ala803Thr
NC_045512.2	2674	nsp2 (807-2720)	A|G|protein_coding|synonymous_variant|LOW|2409A>G|Ala803Ala
NC_045512.2	2675	nsp2 (807-2720)	C|T|protein_coding|missense_variant|MODERATE|2410C>T|Pro804Ser
NC_045512.2	2676	nsp2 (807-2720)	C|T|protein_coding|missense_variant|MODERATE|2411C>T|Pro804Leu
NC_045512.2	2679	nsp2 (807-2720)	A|G|protein_coding|missense_variant|MODERATE|2414A>G|Asn805Ser
NC_045512.2	2680	nsp2 (807-2720)	T|C|protein_coding|synonymous_variant|LOW|2415T>C|Asn805Asn
NC_045512.2	2684	nsp2 (807-2720)	A|G|protein_coding|missense_variant|MODERATE|2419A>G|Met807Val
NC_045512.2	2685	nsp2 (807-2720)	T|C|protein_coding|missense_variant|MODERATE|2420T>C|Met807Thr
NC_045512.2	2686	nsp2 (807-2720)	G|A|protein_coding|missense_variant|MODERATE|2421G>A|Met807Ile
NC_045512.2	2695	nsp2 (807-2720)	C|T|protein_coding|synonymous_variant|LOW|2430C>T|Asn810Asn
NC_045512.2	2696	nsp2 (807-2720)	A|T|protein_coding|missense_variant|MODERATE|2431A>T|Asn811Tyr
NC_045512.2	2697	nsp2 (807-2720)	A|T|protein_coding|missense_variant|MODERATE|2432A>T|Asn811Ile
NC_045512.2	2698	nsp2 (807-2720)	T|C|protein_coding|synonymous_variant|LOW|2433T>C|Asn811Asn
NC_045512.2	2699	nsp2 (807-2720)	A|G|protein_coding|missense_variant|MODERATE|2434A>G|Thr812Ala
NC_045512.2	2700	nsp2 (807-2720)	C|T|protein_coding|missense_variant|MODERATE|2435C>T|Thr812Ile
NC_045512.2	2701	nsp2 (807-2720)	C|T|protein_coding|synonymous_variant|LOW|2436C>T|Thr812Thr
NC_045512.2	2702	nsp2 (807-2720)	T|C|protein_coding|missense_variant|MODERATE|2437T>C|Phe813Leu
NC_045512.2	2704	nsp2 (807-2720)	C|T|protein_coding|synonymous_variant|LOW|2439C>T|Phe813Phe
NC_045512.2	2705	nsp2 (807-2720)	A|G|protein_coding|missense_variant|MODERATE|2440A>G|Thr814Ala
NC_045512.2	2706	nsp2 (807-2720)	C|T|protein_coding|missense_variant|MODERATE|2441C>T|Thr814Ile
NC_045512.2	2707	nsp2 (807-2720)	A|G|protein_coding|synonymous_variant|LOW|2442A>G|Thr814Thr
NC_045512.2	2708	nsp2 (807-2720)	C|T|protein_coding|missense_variant|MODERATE|2443C>T|Leu815Phe
NC_045512.2	2710	nsp2 (807-2720)	C|T|protein_coding|synonymous_variant|LOW|2445C>T|Leu815Leu
NC_045512.2	2712	nsp2 (807-2720)	A|G|protein_coding|missense_variant|MODERATE|2447A>G|Lys816Arg
NC_045512.2	2713	nsp2 (807-2720)	A|G|protein_coding|synonymous_variant|LOW|2448A>G|Lys816Lys
NC_045512.2	2715	nsp2 (807-2720)	G|T|protein_coding|missense_variant|MODERATE|2450G>T|Gly817Val
NC_045512.2	2716	nsp2 (807-2720)	C|T|protein_coding|synonymous_variant|LOW|2451C>T|Gly817Gly
NC_045512.2	2717	nsp2 (807-2720)	G|A|protein_coding|missense_variant|MODERATE|2452G>A|Gly818Ser
NC_045512.2	2719	nsp2 (807-2720)	T|C|protein_coding|synonymous_variant|LOW|2454T>C|Gly818Gly
NC_045512.2	2720	nsp2 (807-2720)	G|T|protein_coding|missense_variant|MODERATE|2455G>T|Ala819Ser
NC_045512.2	2721	nsp3 (2720-8555)	C|T|protein_coding|missense_variant|MODERATE|2456C>T|Ala819Val
NC_045512.2	2722	nsp3 (2720-8555)	A|T|protein_coding|synonymous_variant|LOW|2457A>T|Ala819Ala
NC_045512.2	2723	nsp3 (2720-8555)	C|T|protein_coding|missense_variant|MODERATE|2458C>T|Pro820Ser
NC_045512.2	2724	nsp3 (2720-8555)	C|T|protein_coding|missense_variant|MODERATE|2459C>T|Pro820Leu
NC_045512.2	2725	nsp3 (2720-8555)	A|G|protein_coding|synonymous_variant|LOW|2460A>G|Pro820Pro
NC_045512.2	2730	nsp3 (2720-8555)	A|G|protein_coding|missense_variant|MODERATE|2465A>G|Lys822Arg
NC_045512.2	2731	nsp3 (2720-8555)	G|A|protein_coding|synonymous_variant|LOW|2466G>A|Lys822Lys
NC_045512.2	2732	nsp3 (2720-8555)	G|C|protein_coding|missense_variant|MODERATE|2467G>C|Val823Leu
NC_045512.2	2734	nsp3 (2720-8555)	T|C|protein_coding|synonymous_variant|LOW|2469T>C|Val823Val
NC_045512.2	2737	nsp3 (2720-8555)	T|C|protein_coding|synonymous_variant|LOW|2472T>C|Thr824Thr
NC_045512.2	2741	nsp3 (2720-8555)	G|T|protein_coding|missense_variant|MODERATE|2476G>T|Gly826Cys
NC_045512.2	2745	nsp3 (2720-8555)	A|T|protein_coding|missense_variant|MODERATE|2480A>T|Asp827Val
NC_045512.2	2746	nsp3 (2720-8555)	T|C|protein_coding|synonymous_variant|LOW|2481T>C|Asp827Asp
NC_045512.2	2747	nsp3 (2720-8555)	G|T|protein_coding|missense_variant|MODERATE|2482G>T|Asp828Tyr
NC_045512.2	2748	nsp3 (2720-8555)	A|G|protein_coding|missense_variant|MODERATE|2483A>G|Asp828Gly
NC_045512.2	2749	nsp3 (2720-8555)	C|T|protein_coding|synonymous_variant|LOW|2484C>T|Asp828Asp
NC_045512.2	2752	nsp3 (2720-8555)	T|C|protein_coding|synonymous_variant|LOW|2487T>C|Thr829Thr
NC_045512.2	2755	nsp3 (2720-8555)	G|A|protein_coding|synonymous_variant|LOW|2490G>A|Val830Val
NC_045512.2	2756	nsp3 (2720-8555)	A|C|protein_coding|missense_variant|MODERATE|2491A>C|Ile831Leu
NC_045512.2	2758	nsp3 (2720-8555)	A|C|protein_coding|synonymous_variant|LOW|2493A>C|Ile831Ile
NC_045512.2	2761	nsp3 (2720-8555)	A|T|protein_coding|missense_variant|MODERATE|2496A>T|Glu832Asp
NC_045512.2	2764	nsp3 (2720-8555)	G|T|protein_coding|synonymous_variant|LOW|2499G>T|Val833Val
NC_045512.2	2767	nsp3 (2720-8555)	A|G|protein_coding|synonymous_variant|LOW|2502A>G|Gln834Gln
NC_045512.2	2769	nsp3 (2720-8555)	G|T|protein_coding|missense_variant|MODERATE|2504G>T|Gly835Val
NC_045512.2	2770	nsp3 (2720-8555)	T|A|protein_coding|synonymous_variant|LOW|2505T>A|Gly835Gly
NC_045512.2	2773	nsp3 (2720-8555)	C|T|protein_coding|synonymous_variant|LOW|2508C>T|Tyr836Tyr
NC_045512.2	2775	nsp3 (2720-8555)	A|G|protein_coding|missense_variant|MODERATE|2510A>G|Lys837Arg
NC_045512.2	2776	nsp3 (2720-8555)	G|A|protein_coding|synonymous_variant|LOW|2511G>A|Lys837Lys
NC_045512.2	2778	nsp3 (2720-8555)	G|A|protein_coding|missense_variant|MODERATE|2513G>A|Ser838Asn
NC_045512.2	2780	nsp3 (2720-8555)	G|A|protein_coding|missense_variant|MODERATE|2515G>A|Val839Met
NC_045512.2	2782	nsp3 (2720-8555)	G|T|protein_coding|synonymous_variant|LOW|2517G>T|Val839Val
NC_045512.2	2783	nsp3 (2720-8555)	A|C|protein_coding|missense_variant|MODERATE|2518A>C|Asn840His
NC_045512.2	2784	nsp3 (2720-8555)	A|T|protein_coding|missense_variant|MODERATE|2519A>T|Asn840Ile
NC_045512.2	2785	nsp3 (2720-8555)	T|C|protein_coding|synonymous_variant|LOW|2520T>C|Asn840Asn
NC_045512.2	2786	nsp3 (2720-8555)	A|G|protein_coding|missense_variant|MODERATE|2521A>G|Ile841Val
NC_045512.2	2787	nsp3 (2720-8555)	T|C|protein_coding|missense_variant|MODERATE|2522T>C|Ile841Thr
NC_045512.2	2790	nsp3 (2720-8555)	C|T|protein_coding|missense_variant|MODERATE|2525C>T|Thr842Ile
NC_045512.2	2791	nsp3 (2720-8555)	T|C|protein_coding|synonymous_variant|LOW|2526T>C|Thr842Thr
NC_045512.2	2795	nsp3 (2720-8555)	G|A|protein_coding|missense_variant|MODERATE|2530G>A|Glu844Lys
NC_045512.2	2800	nsp3 (2720-8555)	T|A|protein_coding|synonymous_variant|LOW|2535T>A|Leu845Leu
NC_045512.2	2801	nsp3 (2720-8555)	G|A|protein_coding|missense_variant|MODERATE|2536G>A|Asp846Asn
NC_045512.2	2803	nsp3 (2720-8555)	T|C|protein_coding|synonymous_variant|LOW|2538T>C|Asp846Asp
NC_045512.2	2805	nsp3 (2720-8555)	A|C|protein_coding|missense_variant|MODERATE|2540A>C|Glu847Ala
NC_045512.2	2807	nsp3 (2720-8555)	A|G|protein_coding|missense_variant|MODERATE|2542A>G|Arg848Gly
NC_045512.2	2808	nsp3 (2720-8555)	G|A|protein_coding|missense_variant|MODERATE|2543G>A|Arg848Lys
NC_045512.2	2809	nsp3 (2720-8555)	G|T|protein_coding|missense_variant|MODERATE|2544G>T|Arg848Ser
NC_045512.2	2810	nsp3 (2720-8555)	A|G|protein_coding|missense_variant|MODERATE|2545A>G|Ile849Val
NC_045512.2	2812	nsp3 (2720-8555)	T|C|protein_coding|synonymous_variant|LOW|2547T>C|Ile849Ile
NC_045512.2	2814	nsp3 (2720-8555)	A|C|protein_coding|missense_variant|MODERATE|2549A>C|Asp850Ala
NC_045512.2	2815	nsp3 (2720-8555)	T|C|protein_coding|synonymous_variant|LOW|2550T>C|Asp850Asp
NC_045512.2	2817	nsp3 (2720-8555)	A|G|protein_coding|missense_variant|MODERATE|2552A>G|Lys851Arg
NC_045512.2	2818	nsp3 (2720-8555)	A|C|protein_coding|missense_variant|MODERATE|2553A>C|Lys851Asn
NC_045512.2	2819	nsp3 (2720-8555)	G|A|protein_coding|missense_variant|MODERATE|2554G>A|Val852Ile
NC_045512.2	2820	nsp3 (2720-8555)	T|C|protein_coding|missense_variant|MODERATE|2555T>C|Val852Ala
NC_045512.2	2824	nsp3 (2720-8555)	T|C|protein_coding|synonymous_variant|LOW|2559T>C|Leu853Leu
NC_045512.2	2826	nsp3 (2720-8555)	A|G|protein_coding|missense_variant|MODERATE|2561A>G|Asn854Ser
NC_045512.2	2827	nsp3 (2720-8555)	T|C|protein_coding|synonymous_variant|LOW|2562T>C|Asn854Asn
NC_045512.2	2828	nsp3 (2720-8555)	G|C|protein_coding|missense_variant|MODERATE|2563G>C|Glu855Gln
NC_045512.2	2831	nsp3 (2720-8555)	A|C|protein_coding|missense_variant|MODERATE|2566A>C|Lys856Gln
NC_045512.2	2832	nsp3 (2720-8555)	A|G|protein_coding|missense_variant|MODERATE|2567A>G|Lys856Arg
NC_045512.2	2833	nsp3 (2720-8555)	G|A|protein_coding|synonymous_variant|LOW|2568G>A|Lys856Lys
NC_045512.2	2836	nsp3 (2720-8555)	C|T|protein_coding|synonymous_variant|LOW|2571C>T|Cys857Cys
NC_045512.2	2837	nsp3 (2720-8555)	T|C|protein_coding|missense_variant|MODERATE|2572T>C|Ser858Pro
NC_045512.2	2838	nsp3 (2720-8555)	C|T|protein_coding|missense_variant|MODERATE|2573C>T|Ser858Phe
NC_045512.2	2839	nsp3 (2720-8555)	T|G|protein_coding|synonymous_variant|LOW|2574T>G|Ser858Ser
NC_045512.2	2840	nsp3 (2720-8555)	G|A|protein_coding|missense_variant|MODERATE|2575G>A|Ala859Thr
NC_045512.2	2841	nsp3 (2720-8555)	C|T|protein_coding|missense_variant|MODERATE|2576C>T|Ala859Val
NC_045512.2	2842	nsp3 (2720-8555)	C|T|protein_coding|synonymous_variant|LOW|2577C>T|Ala859Ala
NC_045512.2	2845	nsp3 (2720-8555)	T|C|protein_coding|synonymous_variant|LOW|2580T>C|Tyr860Tyr
NC_045512.2	2847	nsp3 (2720-8555)	C|T|protein_coding|missense_variant|MODERATE|2582C>T|Thr861Ile
NC_045512.2	2849	nsp3 (2720-8555)	G|T|protein_coding|missense_variant|MODERATE|2584G>T|Val862Phe
NC_045512.2	2851	nsp3 (2720-8555)	T|C|protein_coding|synonymous_variant|LOW|2586T>C|Val862Val
NC_045512.2	2852	nsp3 (2720-8555)	G|C|protein_coding|missense_variant|MODERATE|2587G>C|Glu863Gln
NC_045512.2	2854	nsp3 (2720-8555)	A|G|protein_coding|synonymous_variant|LOW|2589A>G|Glu863Glu
NC_045512.2	2857	nsp3 (2720-8555)	C|T|protein_coding|synonymous_variant|LOW|2592C>T|Leu864Leu
NC_045512.2	2861	nsp3 (2720-8555)	A|G|protein_coding|missense_variant|MODERATE|2596A>G|Thr866Ala
NC_045512.2	2862	nsp3 (2720-8555)	C|T|protein_coding|missense_variant|MODERATE|2597C>T|Thr866Ile
NC_045512.2	2863	nsp3 (2720-8555)	A|G|protein_coding|synonymous_variant|LOW|2598A>G|Thr866Thr
NC_045512.2	2866	nsp3 (2720-8555)	A|G|protein_coding|synonymous_variant|LOW|2601A>G|Glu867Glu
NC_045512.2	2867	nsp3 (2720-8555)	G|A|protein_coding|missense_variant|MODERATE|2602G>A|Val868Ile
NC_045512.2	2869	nsp3 (2720-8555)	A|G|protein_coding|synonymous_variant|LOW|2604A>G|Val868Val
NC_045512.2	2870	nsp3 (2720-8555)	A|G|protein_coding|missense_variant|MODERATE|2605A>G|Asn869Asp
NC_045512.2	2871	nsp3 (2720-8555)	A|G|protein_coding|missense_variant|MODERATE|2606A>G|Asn869Ser
NC_045512.2	2872	nsp3 (2720-8555)	T|C|protein_coding|synonymous_variant|LOW|2607T>C|Asn869Asn
NC_045512.2	2875	nsp3 (2720-8555)	G|A|protein_coding|synonymous_variant|LOW|2610G>A|Glu870Glu
NC_045512.2	2876	nsp3 (2720-8555)	T|G|protein_coding|missense_variant|MODERATE|2611T>G|Phe871Val
NC_045512.2	2878	nsp3 (2720-8555)	C|T|protein_coding|synonymous_variant|LOW|2613C>T|Phe871Phe
NC_045512.2	2879	nsp3 (2720-8555)	G|A|protein_coding|missense_variant|MODERATE|2614G>A|Ala872Thr
NC_045512.2	2880	nsp3 (2720-8555)	C|T|protein_coding|missense_variant|MODERATE|2615C>T|Ala872Val
NC_045512.2	2881	nsp3 (2720-8555)	C|T|protein_coding|synonymous_variant|LOW|2616C>T|Ala872Ala
NC_045512.2	2883	nsp3 (2720-8555)	G|A|protein_coding|missense_variant|MODERATE|2618G>A|Cys873Tyr
NC_045512.2	2884	nsp3 (2720-8555)	T|C|protein_coding|synonymous_variant|LOW|2619T>C|Cys873Cys
NC_045512.2	2885	nsp3 (2720-8555)	G|A|protein_coding|missense_variant|MODERATE|2620G>A|Val874Ile
NC_045512.2	2886	nsp3 (2720-8555)	T|C|protein_coding|missense_variant|MODERATE|2621T>C|Val874Ala
NC_045512.2	2888	nsp3 (2720-8555)	G|T|protein_coding|missense_variant|MODERATE|2623G>T|Val875Leu
NC_045512.2	2890	nsp3 (2720-8555)	G|T|protein_coding|synonymous_variant|LOW|2625G>T|Val875Val
NC_045512.2	2891	nsp3 (2720-8555)	G|A|protein_coding|missense_variant|MODERATE|2626G>A|Ala876Thr
NC_045512.2	2892	nsp3 (2720-8555)	C|T|protein_coding|missense_variant|MODERATE|2627C>T|Ala876Val
NC_045512.2	2893	nsp3 (2720-8555)	A|G|protein_coding|synonymous_variant|LOW|2628A>G|Ala876Ala
NC_045512.2	2894	nsp3 (2720-8555)	G|C|protein_coding|missense_variant|MODERATE|2629G>C|Asp877His
NC_045512.2	2895	nsp3 (2720-8555)	A|C|protein_coding|missense_variant|MODERATE|2630A>C|Asp877Ala
NC_045512.2	2896	nsp3 (2720-8555)	T|C|protein_coding|synonymous_variant|LOW|2631T>C|Asp877Asp
NC_045512.2	2897	nsp3 (2720-8555)	G|A|protein_coding|missense_variant|MODERATE|2632G>A|Ala878Thr
NC_045512.2	2900	nsp3 (2720-8555)	G|T|protein_coding|missense_variant|MODERATE|2635G>T|Val879Phe
NC_045512.2	2901	nsp3 (2720-8555)	T|C|protein_coding|missense_variant|MODERATE|2636T>C|Val879Ala
NC_045512.2	2902	nsp3 (2720-8555)	C|T|protein_coding|synonymous_variant|LOW|2637C>T|Val879Val
NC_045512.2	2903	nsp3 (2720-8555)	A|G|protein_coding|missense_variant|MODERATE|2638A>G|Ile880Val
NC_045512.2	2904	nsp3 (2720-8555)	T|A|protein_coding|missense_variant|MODERATE|2639T>A|Ile880Lys
NC_045512.2	2905	nsp3 (2720-8555)	A|G|protein_coding|missense_variant|MODERATE|2640A>G|Ile880Met
NC_045512.2	2909	nsp3 (2720-8555)	A|C|protein_coding|missense_variant|MODERATE|2644A>C|Thr882Pro
NC_045512.2	2910	nsp3 (2720-8555)	C|T|protein_coding|missense_variant|MODERATE|2645C>T|Thr882Ile
NC_045512.2	2911	nsp3 (2720-8555)	T|G|protein_coding|synonymous_variant|LOW|2646T>G|Thr882Thr
NC_045512.2	2914	nsp3 (2720-8555)	G|A|protein_coding|synonymous_variant|LOW|2649G>A|Leu883Leu
NC_045512.2	2915	nsp3 (2720-8555)	C|A|protein_coding|missense_variant|MODERATE|2650C>A|Gln884Lys
NC_045512.2	2916	nsp3 (2720-8555)	A|T|protein_coding|missense_variant|MODERATE|2651A>T|Gln884Leu
NC_045512.2	2918	nsp3 (2720-8555)	C|T|protein_coding|missense_variant|MODERATE|2653C>T|Pro885Ser
NC_045512.2	2919	nsp3 (2720-8555)	C|T|protein_coding|missense_variant|MODERATE|2654C>T|Pro885Leu
NC_045512.2	2921	nsp3 (2720-8555)	G|A|protein_coding|missense_variant|MODERATE|2656G>A|Val886Ile
NC_045512.2	2922	nsp3 (2720-8555)	T|C|protein_coding|missense_variant|MODERATE|2657T>C|Val886Ala
NC_045512.2	2923	nsp3 (2720-8555)	A|G|protein_coding|synonymous_variant|LOW|2658A>G|Val886Val
NC_045512.2	2925	nsp3 (2720-8555)	C|T|protein_coding|missense_variant|MODERATE|2660C>T|Ser887Phe
NC_045512.2	2930	nsp3 (2720-8555)	T|C|protein_coding|synonymous_variant|LOW|2665T>C|Leu889Leu
NC_045512.2	2931	nsp3 (2720-8555)	T|C|protein_coding|missense_variant|MODERATE|2666T>C|Leu889Ser
NC_045512.2	2932	nsp3 (2720-8555)	A|G|protein_coding|synonymous_variant|LOW|2667A>G|Leu889Leu
NC_045512.2	2933	nsp3 (2720-8555)	C|T|protein_coding|missense_variant|MODERATE|2668C>T|Leu890Phe
NC_045512.2	2937	nsp3 (2720-8555)	C|T|protein_coding|missense_variant|MODERATE|2672C>T|Thr891Ile
NC_045512.2	2938	nsp3 (2720-8555)	A|G|protein_coding|synonymous_variant|LOW|2673A>G|Thr891Thr
NC_045512.2	2939	nsp3 (2720-8555)	C|T|protein_coding|missense_variant|MODERATE|2674C>T|Pro892Ser
NC_045512.2	2940	nsp3 (2720-8555)	C|T|protein_coding|missense_variant|MODERATE|2675C>T|Pro892Leu
NC_045512.2	2942	nsp3 (2720-8555)	C|T|protein_coding|synonymous_variant|LOW|2677C>T|Leu893Leu
NC_045512.2	2944	nsp3 (2720-8555)	G|A|protein_coding|synonymous_variant|LOW|2679G>A|Leu893Leu
NC_045512.2	2945	nsp3 (2720-8555)	G|A|protein_coding|missense_variant|MODERATE|2680G>A|Gly894Ser
NC_045512.2	2946	nsp3 (2720-8555)	G|A|protein_coding|missense_variant|MODERATE|2681G>A|Gly894Asp
NC_045512.2	2950	nsp3 (2720-8555)	T|A|protein_coding|synonymous_variant|LOW|2685T>A|Ile895Ile
NC_045512.2	2951	nsp3 (2720-8555)	G|T|protein_coding|missense_variant|MODERATE|2686G>T|Asp896Tyr
NC_045512.2	2952	nsp3 (2720-8555)	A|G|protein_coding|missense_variant|MODERATE|2687A>G|Asp896Gly
NC_045512.2	2955	nsp3 (2720-8555)	T|G|protein_coding|stop_gained|HIGH|2690T>G|Leu897*
NC_045512.2	2956	nsp3 (2720-8555)	A|G|protein_coding|synonymous_variant|LOW|2691A>G|Leu897Leu
NC_045512.2	2957	nsp3 (2720-8555)	G|T|protein_coding|missense_variant|MODERATE|2692G>T|Asp898Tyr
NC_045512.2	2962	nsp3 (2720-8555)	G|A|protein_coding|synonymous_variant|LOW|2697G>A|Glu899Glu
NC_045512.2	2966	nsp3 (2720-8555)	A|G|protein_coding|missense_variant|MODERATE|2701A>G|Ser901Gly
NC_045512.2	2967	nsp3 (2720-8555)	G|C|protein_coding|missense_variant|MODERATE|2702G>C|Ser901Thr
NC_045512.2	2968	nsp3 (2720-8555)	T|C|protein_coding|synonymous_variant|LOW|2703T>C|Ser901Ser
NC_045512.2	2969	nsp3 (2720-8555)	A|G|protein_coding|missense_variant|MODERATE|2704A>G|Met902Val
NC_045512.2	2971	nsp3 (2720-8555)	G|T|protein_coding|missense_variant|MODERATE|2706G>T|Met902Ile
NC_045512.2	2973	nsp3 (2720-8555)	C|T|protein_coding|missense_variant|MODERATE|2708C>T|Ala903Val
NC_045512.2	2976	nsp3 (2720-8555)	C|T|protein_coding|missense_variant|MODERATE|2711C>T|Thr904Ile
NC_045512.2	2978	nsp3 (2720-8555)	T|C|protein_coding|missense_variant|MODERATE|2713T>C|Tyr905His
NC_045512.2	2980	nsp3 (2720-8555)	C|T|protein_coding|synonymous_variant|LOW|2715C>T|Tyr905Tyr
NC_045512.2	2981	nsp3 (2720-8555)	T|C|protein_coding|missense_variant|MODERATE|2716T>C|Tyr906His
NC_045512.2	2982	nsp3 (2720-8555)	A|G|protein_coding|missense_variant|MODERATE|2717A>G|Tyr906Cys
NC_045512.2	2983	nsp3 (2720-8555)	C|T|protein_coding|synonymous_variant|LOW|2718C>T|Tyr906Tyr
NC_045512.2	2986	nsp3 (2720-8555)	A|G|protein_coding|synonymous_variant|LOW|2721A>G|Leu907Leu
NC_045512.2	2987	nsp3 (2720-8555)	T|C|protein_coding|missense_variant|MODERATE|2722T>C|Phe908Leu
NC_045512.2	2991	nsp3 (2720-8555)	A|G|protein_coding|missense_variant|MODERATE|2726A>G|Asp909Gly
NC_045512.2	2992	nsp3 (2720-8555)	T|C|protein_coding|synonymous_variant|LOW|2727T>C|Asp909Asp
NC_045512.2	2994	nsp3 (2720-8555)	A|G|protein_coding|missense_variant|MODERATE|2729A>G|Glu910Gly
NC_045512.2	2995	nsp3 (2720-8555)	G|A|protein_coding|synonymous_variant|LOW|2730G>A|Glu910Glu
NC_045512.2	2997	nsp3 (2720-8555)	C|T|protein_coding|missense_variant|MODERATE|2732C>T|Ser911Phe
NC_045512.2	2998	nsp3 (2720-8555)	T|A|protein_coding|synonymous_variant|LOW|2733T>A|Ser911Ser
NC_045512.2	3003	nsp3 (2720-8555)	A|T|protein_coding|missense_variant|MODERATE|2738A>T|Glu913Val
NC_045512.2	3004	nsp3 (2720-8555)	G|T|protein_coding|missense_variant|MODERATE|2739G>T|Glu913Asp
NC_045512.2	3010	nsp3 (2720-8555)	A|G|protein_coding|synonymous_variant|LOW|2745A>G|Lys915Lys
NC_045512.2	3011	nsp3 (2720-8555)	T|C|protein_coding|synonymous_variant|LOW|2746T>C|Leu916Leu
NC_045512.2	3013	nsp3 (2720-8555)	G|T|protein_coding|missense_variant|MODERATE|2748G>T|Leu916Phe
NC_045512.2	3014	nsp3 (2720-8555)	G|A|protein_coding|missense_variant|MODERATE|2749G>A|Ala917Thr
NC_045512.2	3016	nsp3 (2720-8555)	T|C|protein_coding|synonymous_variant|LOW|2751T>C|Ala917Ala
NC_045512.2	3017	nsp3 (2720-8555)	T|C|protein_coding|missense_variant|MODERATE|2752T>C|Ser918Pro
NC_045512.2	3018	nsp3 (2720-8555)	C|T|protein_coding|missense_variant|MODERATE|2753C>T|Ser918Leu
NC_045512.2	3022	nsp3 (2720-8555)	T|A|protein_coding|missense_variant|MODERATE|2757T>A|His919Gln
NC_045512.2	3024	nsp3 (2720-8555)	T|G|protein_coding|missense_variant|MODERATE|2759T>G|Met920Arg
NC_045512.2	3025	nsp3 (2720-8555)	G|T|protein_coding|missense_variant|MODERATE|2760G>T|Met920Ile
NC_045512.2	3026	nsp3 (2720-8555)	T|C|protein_coding|missense_variant|MODERATE|2761T>C|Tyr921His
NC_045512.2	3027	nsp3 (2720-8555)	A|G|protein_coding|missense_variant|MODERATE|2762A>G|Tyr921Cys
NC_045512.2	3033	nsp3 (2720-8555)	C|T|protein_coding|missense_variant|MODERATE|2768C>T|Ser923Phe
NC_045512.2	3034	nsp3 (2720-8555)	T|C|protein_coding|synonymous_variant|LOW|2769T>C|Ser923Ser
NC_045512.2	3037	nsp3 (2720-8555)	C|T|protein_coding|synonymous_variant|LOW|2772C>T|Phe924Phe
NC_045512.2	3038	nsp3 (2720-8555)	T|A|protein_coding|missense_variant|MODERATE|2773T>A|Tyr925Asn
NC_045512.2	3039	nsp3 (2720-8555)	A|G|protein_coding|missense_variant|MODERATE|2774A>G|Tyr925Cys
NC_045512.2	3040	nsp3 (2720-8555)	C|T|protein_coding|synonymous_variant|LOW|2775C>T|Tyr925Tyr
NC_045512.2	3041	nsp3 (2720-8555)	C|A|protein_coding|missense_variant|MODERATE|2776C>A|Pro926Thr
NC_045512.2	3042	nsp3 (2720-8555)	C|A|protein_coding|missense_variant|MODERATE|2777C>A|Pro926His
NC_045512.2	3044	nsp3 (2720-8555)	C|T|protein_coding|missense_variant|MODERATE|2779C>T|Pro927Ser
NC_045512.2	3045	nsp3 (2720-8555)	C|T|protein_coding|missense_variant|MODERATE|2780C>T|Pro927Leu
NC_045512.2	3046	nsp3 (2720-8555)	A|G|protein_coding|synonymous_variant|LOW|2781A>G|Pro927Pro
NC_045512.2	3047	nsp3 (2720-8555)	G|T|protein_coding|missense_variant|MODERATE|2782G>T|Asp928Tyr
NC_045512.2	3049	nsp3 (2720-8555)	T|C|protein_coding|synonymous_variant|LOW|2784T>C|Asp928Asp
NC_045512.2	3050	nsp3 (2720-8555)	G|A|protein_coding|missense_variant|MODERATE|2785G>A|Glu929Lys
NC_045512.2	3052	nsp3 (2720-8555)	G|A|protein_coding|synonymous_variant|LOW|2787G>A|Glu929Glu
NC_045512.2	3053	nsp3 (2720-8555)	G|A|protein_coding|missense_variant|MODERATE|2788G>A|Asp930Asn
NC_045512.2	3054	nsp3 (2720-8555)	A|G|protein_coding|missense_variant|MODERATE|2789A>G|Asp930Gly
NC_045512.2	3055	nsp3 (2720-8555)	T|C|protein_coding|synonymous_variant|LOW|2790T>C|Asp930Asp
NC_045512.2	3056	nsp3 (2720-8555)	G|A|protein_coding|missense_variant|MODERATE|2791G>A|Glu931Lys
NC_045512.2	3057	nsp3 (2720-8555)	A|G|protein_coding|missense_variant|MODERATE|2792A>G|Glu931Gly
NC_045512.2	3058	nsp3 (2720-8555)	A|C|protein_coding|missense_variant|MODERATE|2793A>C|Glu931Asp
NC_045512.2	3059	nsp3 (2720-8555)	G|A|protein_coding|missense_variant|MODERATE|2794G>A|Glu932Lys
NC_045512.2	3063	nsp3 (2720-8555)	A|G|protein_coding|missense_variant|MODERATE|2798A>G|Glu933Gly
NC_045512.2	3064	nsp3 (2720-8555)	A|G|protein_coding|synonymous_variant|LOW|2799A>G|Glu933Glu
NC_045512.2	3065	nsp3 (2720-8555)	G|T|protein_coding|missense_variant|MODERATE|2800G>T|Gly934Cys
NC_045512.2	3066	nsp3 (2720-8555)	G|A|protein_coding|missense_variant|MODERATE|2801G>A|Gly934Asp
NC_045512.2	3068	nsp3 (2720-8555)	G|A|protein_coding|missense_variant|MODERATE|2803G>A|Asp935Asn
NC_045512.2	3069	nsp3 (2720-8555)	A|G|protein_coding|missense_variant|MODERATE|2804A>G|Asp935Gly
NC_045512.2	3070	nsp3 (2720-8555)	T|C|protein_coding|synonymous_variant|LOW|2805T>C|Asp935Asp
NC_045512.2	3071	nsp3 (2720-8555)	T|C|protein_coding|missense_variant|MODERATE|2806T>C|Cys936Arg
NC_045512.2	3072	nsp3 (2720-8555)	G|A|protein_coding|missense_variant|MODERATE|2807G>A|Cys936Tyr
NC_045512.2	3073	nsp3 (2720-8555)	T|C|protein_coding|synonymous_variant|LOW|2808T>C|Cys936Cys
NC_045512.2	3074	nsp3 (2720-8555)	G|A|protein_coding|missense_variant|MODERATE|2809G>A|Glu937Lys
NC_045512.2	3075	nsp3 (2720-8555)	A|G|protein_coding|missense_variant|MODERATE|2810A>G|Glu937Gly
NC_045512.2	3076	nsp3 (2720-8555)	A|T|protein_coding|missense_variant|MODERATE|2811A>T|Glu937Asp
NC_045512.2	3078	nsp3 (2720-8555)	A|G|protein_coding|missense_variant|MODERATE|2813A>G|Glu938Gly
NC_045512.2	3079	nsp3 (2720-8555)	A|T|protein_coding|missense_variant|MODERATE|2814A>T|Glu938Asp
NC_045512.2	3081	nsp3 (2720-8555)	A|C|protein_coding|missense_variant|MODERATE|2816A>C|Glu939Ala
NC_045512.2	3082	nsp3 (2720-8555)	A|G|protein_coding|synonymous_variant|LOW|2817A>G|Glu939Glu
NC_045512.2	3085	nsp3 (2720-8555)	G|T|protein_coding|missense_variant|MODERATE|2820G>T|Glu940Asp
NC_045512.2	3086	nsp3 (2720-8555)	T|C|protein_coding|missense_variant|MODERATE|2821T>C|Phe941Leu
NC_045512.2	3090	nsp3 (2720-8555)	A|G|protein_coding|missense_variant|MODERATE|2825A>G|Glu942Gly
NC_045512.2	3091	nsp3 (2720-8555)	G|T|protein_coding|missense_variant|MODERATE|2826G>T|Glu942Asp
NC_045512.2	3092	nsp3 (2720-8555)	C|T|protein_coding|missense_variant|MODERATE|2827C>T|Pro943Ser
NC_045512.2	3093	nsp3 (2720-8555)	C|A|protein_coding|missense_variant|MODERATE|2828C>A|Pro943Gln
NC_045512.2	3094	nsp3 (2720-8555)	A|G|protein_coding|synonymous_variant|LOW|2829A>G|Pro943Pro
NC_045512.2	3095	nsp3 (2720-8555)	T|C|protein_coding|missense_variant|MODERATE|2830T>C|Ser944Pro
NC_045512.2	3096	nsp3 (2720-8555)	C|T|protein_coding|missense_variant|MODERATE|2831C>T|Ser944Leu
NC_045512.2	3097	nsp3 (2720-8555)	A|G|protein_coding|synonymous_variant|LOW|2832A>G|Ser944Ser
NC_045512.2	3099	nsp3 (2720-8555)	C|A|protein_coding|missense_variant|MODERATE|2834C>A|Thr945Asn
NC_045512.2	3100	nsp3 (2720-8555)	T|G|protein_coding|synonymous_variant|LOW|2835T>G|Thr945Thr
NC_045512.2	3102	nsp3 (2720-8555)	A|G|protein_coding|missense_variant|MODERATE|2837A>G|Gln946Arg
NC_045512.2	3103	nsp3 (2720-8555)	A|C|protein_coding|missense_variant|MODERATE|2838A>C|Gln946His
NC_045512.2	3106	nsp3 (2720-8555)	T|C|protein_coding|synonymous_variant|LOW|2841T>C|Tyr947Tyr
NC_045512.2	3109	nsp3 (2720-8555)	G|A|protein_coding|synonymous_variant|LOW|2844G>A|Glu948Glu
NC_045512.2	3111	nsp3 (2720-8555)	A|G|protein_coding|missense_variant|MODERATE|2846A>G|Tyr949Cys
NC_045512.2	3112	nsp3 (2720-8555)	T|A|protein_coding|stop_gained|HIGH|2847T>A|Tyr949*
NC_045512.2	3113	nsp3 (2720-8555)	G|C|protein_coding|missense_variant|MODERATE|2848G>C|Gly950Arg
NC_045512.2	3115	nsp3 (2720-8555)	T|C|protein_coding|synonymous_variant|LOW|2850T>C|Gly950Gly
NC_045512.2	3116	nsp3 (2720-8555)	A|G|protein_coding|missense_variant|MODERATE|2851A>G|Thr951Ala
NC_045512.2	3117	nsp3 (2720-8555)	C|T|protein_coding|missense_variant|MODERATE|2852C>T|Thr951Ile
NC_045512.2	3118	nsp3 (2720-8555)	T|C|protein_coding|synonymous_variant|LOW|2853T>C|Thr951Thr
NC_045512.2	3119	nsp3 (2720-8555)	G|A|protein_coding|missense_variant|MODERATE|2854G>A|Glu952Lys
NC_045512.2	3121	nsp3 (2720-8555)	A|G|protein_coding|synonymous_variant|LOW|2856A>G|Glu952Glu
NC_045512.2	3122	nsp3 (2720-8555)	G|T|protein_coding|missense_variant|MODERATE|2857G>T|Asp953Tyr
NC_045512.2	3123	nsp3 (2720-8555)	A|G|protein_coding|missense_variant|MODERATE|2858A>G|Asp953Gly
NC_045512.2	3124	nsp3 (2720-8555)	T|C|protein_coding|synonymous_variant|LOW|2859T>C|Asp953Asp
NC_045512.2	3126	nsp3 (2720-8555)	A|G|protein_coding|missense_variant|MODERATE|2861A>G|Asp954Gly
NC_045512.2	3130	nsp3 (2720-8555)	C|T|protein_coding|synonymous_variant|LOW|2865C>T|Tyr955Tyr
NC_045512.2	3132	nsp3 (2720-8555)	A|G|protein_coding|missense_variant|MODERATE|2867A>G|Gln956Arg
NC_045512.2	3133	nsp3 (2720-8555)	A|G|protein_coding|synonymous_variant|LOW|2868A>G|Gln956Gln
NC_045512.2	3134	nsp3 (2720-8555)	G|A|protein_coding|missense_variant|MODERATE|2869G>A|Gly957Ser
NC_045512.2	3136	nsp3 (2720-8555)	T|C|protein_coding|synonymous_variant|LOW|2871T>C|Gly957Gly
NC_045512.2	3137	nsp3 (2720-8555)	A|G|protein_coding|missense_variant|MODERATE|2872A>G|Lys958Glu
NC_045512.2	3138	nsp3 (2720-8555)	A|G|protein_coding|missense_variant|MODERATE|2873A>G|Lys958Arg
NC_045512.2	3140	nsp3 (2720-8555)	C|T|protein_coding|missense_variant|MODERATE|2875C>T|Pro959Ser
NC_045512.2	3141	nsp3 (2720-8555)	C|A|protein_coding|missense_variant|MODERATE|2876C>A|Pro959His
NC_045512.2	3142	nsp3 (2720-8555)	T|A|protein_coding|synonymous_variant|LOW|2877T>A|Pro959Pro
NC_045512.2	3143	nsp3 (2720-8555)	T|C|protein_coding|synonymous_variant|LOW|2878T>C|Leu960Leu
NC_045512.2	3144	nsp3 (2720-8555)	T|C|protein_coding|missense_variant|MODERATE|2879T>C|Leu960Ser
NC_045512.2	3145	nsp3 (2720-8555)	G|T|protein_coding|missense_variant|MODERATE|2880G>T|Leu960Phe
NC_045512.2	3146	nsp3 (2720-8555)	G|C|protein_coding|missense_variant|MODERATE|2881G>C|Glu961Gln
NC_045512.2	3147	nsp3 (2720-8555)	A|G|protein_coding|missense_variant|MODERATE|2882A>G|Glu961Gly
NC_045512.2	3148	nsp3 (2720-8555)	A|G|protein_coding|synonymous_variant|LOW|2883A>G|Glu961Glu
NC_045512.2	3149	nsp3 (2720-8555)	T|C|protein_coding|missense_variant|MODERATE|2884T>C|Phe962Leu
NC_045512.2	3150	nsp3 (2720-8555)	T|G|protein_coding|missense_variant|MODERATE|2885T>G|Phe962Cys
NC_045512.2	3152	nsp3 (2720-8555)	G|A|protein_coding|missense_variant|MODERATE|2887G>A|Gly963Ser
NC_045512.2	3155	nsp3 (2720-8555)	G|C|protein_coding|missense_variant|MODERATE|2890G>C|Ala964Pro
NC_045512.2	3156	nsp3 (2720-8555)	C|T|protein_coding|missense_variant|MODERATE|2891C>T|Ala964Val
NC_045512.2	3157	nsp3 (2720-8555)	C|T|protein_coding|synonymous_variant|LOW|2892C>T|Ala964Ala
NC_045512.2	3159	nsp3 (2720-8555)	C|A|protein_coding|missense_variant|MODERATE|2894C>A|Thr965Asn
NC_045512.2	3160	nsp3 (2720-8555)	T|C|protein_coding|synonymous_variant|LOW|2895T>C|Thr965Thr
NC_045512.2	3161	nsp3 (2720-8555)	T|G|protein_coding|missense_variant|MODERATE|2896T>G|Ser966Ala
NC_045512.2	3162	nsp3 (2720-8555)	C|T|protein_coding|missense_variant|MODERATE|2897C>T|Ser966Phe
NC_045512.2	3163	nsp3 (2720-8555)	T|C|protein_coding|synonymous_variant|LOW|2898T>C|Ser966Ser
NC_045512.2	3164	nsp3 (2720-8555)	G|C|protein_coding|missense_variant|MODERATE|2899G>C|Ala967Pro
NC_045512.2	3165	nsp3 (2720-8555)	C|T|protein_coding|missense_variant|MODERATE|2900C>T|Ala967Val
NC_045512.2	3166	nsp3 (2720-8555)	T|C|protein_coding|synonymous_variant|LOW|2901T>C|Ala967Ala
NC_045512.2	3167	nsp3 (2720-8555)	G|T|protein_coding|missense_variant|MODERATE|2902G>T|Ala968Ser
NC_045512.2	3168	nsp3 (2720-8555)	C|T|protein_coding|missense_variant|MODERATE|2903C>T|Ala968Val
NC_045512.2	3169	nsp3 (2720-8555)	T|C|protein_coding|synonymous_variant|LOW|2904T>C|Ala968Ala
NC_045512.2	3170	nsp3 (2720-8555)	C|T|protein_coding|missense_variant|MODERATE|2905C>T|Leu969Phe
NC_045512.2	3171	nsp3 (2720-8555)	T|A|protein_coding|missense_variant|MODERATE|2906T>A|Leu969His
NC_045512.2	3172	nsp3 (2720-8555)	T|C|protein_coding|synonymous_variant|LOW|2907T>C|Leu969Leu
NC_045512.2	3174	nsp3 (2720-8555)	A|T|protein_coding|missense_variant|MODERATE|2909A>T|Gln970Leu
NC_045512.2	3175	nsp3 (2720-8555)	A|G|protein_coding|synonymous_variant|LOW|2910A>G|Gln970Gln
NC_045512.2	3176	nsp3 (2720-8555)	C|T|protein_coding|missense_variant|MODERATE|2911C>T|Pro971Ser
NC_045512.2	3177	nsp3 (2720-8555)	C|T|protein_coding|missense_variant|MODERATE|2912C>T|Pro971Leu
NC_045512.2	3178	nsp3 (2720-8555)	T|A|protein_coding|synonymous_variant|LOW|2913T>A|Pro971Pro
NC_045512.2	3179	nsp3 (2720-8555)	G|A|protein_coding|missense_variant|MODERATE|2914G>A|Glu972Lys
NC_045512.2	3180	nsp3 (2720-8555)	A|C|protein_coding|missense_variant|MODERATE|2915A>C|Glu972Ala
NC_045512.2	3181	nsp3 (2720-8555)	A|T|protein_coding|missense_variant|MODERATE|2916A>T|Glu972Asp
NC_045512.2	3184	nsp3 (2720-8555)	A|G|protein_coding|synonymous_variant|LOW|2919A>G|Glu973Glu
NC_045512.2	3185	nsp3 (2720-8555)	G|A|protein_coding|missense_variant|MODERATE|2920G>A|Glu974Lys
[truncated: 14,003 more rows]

## Sheet: All mutations
Table S1. Nucleotide positions of the SARS-CoV-2 pan-genome over which the 20,163 instances of global polymorphism are distributed [positions are numbered with reference to the 5’ to 3’ sequence (NC_045512.2) of the earliest-sequenced strain from Wuhan, China].
Nucleotide position	Loci (length in bp)	Details of the mutation
21	5' UTR (1-265)	C|T|protein_coding|upstream_gene_variant|MODIFIER|-245C>T|
25	5' UTR (1-265)	T|C|protein_coding|upstream_gene_variant|MODIFIER|-241T>C|
27	5' UTR (1-265)	A|C|protein_coding|upstream_gene_variant|MODIFIER|-239A>C|
27	5' UTR (1-265)	A|G|protein_coding|upstream_gene_variant|MODIFIER|-239A>G|
28	5' UTR (1-265)	C|T|protein_coding|upstream_gene_variant|MODIFIER|-238C>T|
28	5' UTR (1-265)	C|A|protein_coding|upstream_gene_variant|MODIFIER|-238C>A|
29	5' UTR (1-265)	A|C|protein_coding|upstream_gene_variant|MODIFIER|-237A>C|
29	5' UTR (1-265)	A|T|protein_coding|upstream_gene_variant|MODIFIER|-237A>T|
30	5' UTR (1-265)	A|T|protein_coding|upstream_gene_variant|MODIFIER|-236A>T|
30	5' UTR (1-265)	A|C|protein_coding|upstream_gene_variant|MODIFIER|-236A>C|
31	5' UTR (1-265)	A|T|protein_coding|upstream_gene_variant|MODIFIER|-235A>T|
31	5' UTR (1-265)	A|G|protein_coding|upstream_gene_variant|MODIFIER|-235A>G|
32	5' UTR (1-265)	C|T|protein_coding|upstream_gene_variant|MODIFIER|-234C>T|
34	5' UTR (1-265)	A|T|protein_coding|upstream_gene_variant|MODIFIER|-232A>T|
35	5' UTR (1-265)	A|T|protein_coding|upstream_gene_variant|MODIFIER|-231A>T|
35	5' UTR (1-265)	A|G|protein_coding|upstream_gene_variant|MODIFIER|-231A>G|
36	5' UTR (1-265)	C|T|protein_coding|upstream_gene_variant|MODIFIER|-230C>T|
36	5' UTR (1-265)	C|G|protein_coding|upstream_gene_variant|MODIFIER|-230C>G|
37	5' UTR (1-265)	C|T|protein_coding|upstream_gene_variant|MODIFIER|-229C>T|
37	5' UTR (1-265)	C|A|protein_coding|upstream_gene_variant|MODIFIER|-229C>A|
38	5' UTR (1-265)	A|T|protein_coding|upstream_gene_variant|MODIFIER|-228A>T|
40	5' UTR (1-265)	C|T|protein_coding|upstream_gene_variant|MODIFIER|-226C>T|
41	5' UTR (1-265)	T|A|protein_coding|upstream_gene_variant|MODIFIER|-225T>A|
41	5' UTR (1-265)	T|G|protein_coding|upstream_gene_variant|MODIFIER|-225T>G|
42	5' UTR (1-265)	T|A|protein_coding|upstream_gene_variant|MODIFIER|-224T>A|
43	5' UTR (1-265)	T|C|protein_coding|upstream_gene_variant|MODIFIER|-223T>C|
44	5' UTR (1-265)	C|T|protein_coding|upstream_gene_variant|MODIFIER|-222C>T|
45	5' UTR (1-265)	G|C|protein_coding|upstream_gene_variant|MODIFIER|-221G>C|
45	5' UTR (1-265)	G|T|protein_coding|upstream_gene_variant|MODIFIER|-221G>T|
48	5' UTR (1-265)	C|A|protein_coding|upstream_gene_variant|MODIFIER|-218C>A|
54	5' UTR (1-265)	T|A|protein_coding|upstream_gene_variant|MODIFIER|-212T>A|
55	5' UTR (1-265)	A|C|protein_coding|upstream_gene_variant|MODIFIER|-211A>C|
61	5' UTR (1-265)	G|T|protein_coding|upstream_gene_variant|MODIFIER|-205G>T|
61	5' UTR (1-265)	G|A|protein_coding|upstream_gene_variant|MODIFIER|-205G>A|
63	5' UTR (1-265)	T|C|protein_coding|upstream_gene_variant|MODIFIER|-203T>C|
64	5' UTR (1-265)	C|T|protein_coding|upstream_gene_variant|MODIFIER|-202C>T|
66	5' UTR (1-265)	C|A|protein_coding|upstream_gene_variant|MODIFIER|-200C>A|
66	5' UTR (1-265)	C|T|protein_coding|upstream_gene_variant|MODIFIER|-200C>T|
68	5' UTR (1-265)	A|T|protein_coding|upstream_gene_variant|MODIFIER|-198A>T|
72	5' UTR (1-265)	G|A|protein_coding|upstream_gene_variant|MODIFIER|-194G>A|
73	5' UTR (1-265)	A|T|protein_coding|upstream_gene_variant|MODIFIER|-193A>T|
74	5' UTR (1-265)	A|C|protein_coding|upstream_gene_variant|MODIFIER|-192A>C|
75	5' UTR (1-265)	C|T|protein_coding|upstream_gene_variant|MODIFIER|-191C>T|
76	5' UTR (1-265)	T|A|protein_coding|upstream_gene_variant|MODIFIER|-190T>A|
77	5' UTR (1-265)	T|C|protein_coding|upstream_gene_variant|MODIFIER|-189T>C|
77	5' UTR (1-265)	T|A|protein_coding|upstream_gene_variant|MODIFIER|-189T>A|
78	5' UTR (1-265)	T|G|protein_coding|upstream_gene_variant|MODIFIER|-188T>G|
78	5' UTR (1-265)	T|A|protein_coding|upstream_gene_variant|MODIFIER|-188T>A|
79	5' UTR (1-265)	A|G|protein_coding|upstream_gene_variant|MODIFIER|-187A>G|
79	5' UTR (1-265)	A|C|protein_coding|upstream_gene_variant|MODIFIER|-187A>C|
80	5' UTR (1-265)	A|G|protein_coding|upstream_gene_variant|MODIFIER|-186A>G|
80	5' UTR (1-265)	A|T|protein_coding|upstream_gene_variant|MODIFIER|-186A>T|
82	5' UTR (1-265)	A|T|protein_coding|upstream_gene_variant|MODIFIER|-184A>T|
82	5' UTR (1-265)	A|G|protein_coding|upstream_gene_variant|MODIFIER|-184A>G|
83	5' UTR (1-265)	T|C|protein_coding|upstream_gene_variant|MODIFIER|-183T>C|
84	5' UTR (1-265)	C|T|protein_coding|upstream_gene_variant|MODIFIER|-182C>T|
84	5' UTR (1-265)	C|G|protein_coding|upstream_gene_variant|MODIFIER|-182C>G|
84	5' UTR (1-265)	C|A|protein_coding|upstream_gene_variant|MODIFIER|-182C>A|
85	5' UTR (1-265)	T|G|protein_coding|upstream_gene_variant|MODIFIER|-181T>G|
85	5' UTR (1-265)	T|C|protein_coding|upstream_gene_variant|MODIFIER|-181T>C|
86	5' UTR (1-265)	G|A|protein_coding|upstream_gene_variant|MODIFIER|-180G>A|
87	5' UTR (1-265)	T|G|protein_coding|upstream_gene_variant|MODIFIER|-179T>G|
88	5' UTR (1-265)	G|A|protein_coding|upstream_gene_variant|MODIFIER|-178G>A|
88	5' UTR (1-265)	G|T|protein_coding|upstream_gene_variant|MODIFIER|-178G>T|
89	5' UTR (1-265)	T|C|protein_coding|upstream_gene_variant|MODIFIER|-177T>C|
90	5' UTR (1-265)	G|T|protein_coding|upstream_gene_variant|MODIFIER|-176G>T|
91	5' UTR (1-265)	G|A|protein_coding|upstream_gene_variant|MODIFIER|-175G>A|
91	5' UTR (1-265)	G|T|protein_coding|upstream_gene_variant|MODIFIER|-175G>T|
91	5' UTR (1-265)	G|C|protein_coding|upstream_gene_variant|MODIFIER|-175G>C|
92	5' UTR (1-265)	C|T|protein_coding|upstream_gene_variant|MODIFIER|-174C>T|
92	5' UTR (1-265)	C|A|protein_coding|upstream_gene_variant|MODIFIER|-174C>A|
94	5' UTR (1-265)	G|T|protein_coding|upstream_gene_variant|MODIFIER|-172G>T|
95	5' UTR (1-265)	T|A|protein_coding|upstream_gene_variant|MODIFIER|-171T>A|
95	5' UTR (1-265)	T|C|protein_coding|upstream_gene_variant|MODIFIER|-171T>C|
96	5' UTR (1-265)	C|T|protein_coding|upstream_gene_variant|MODIFIER|-170C>T|
97	5' UTR (1-265)	A|G|protein_coding|upstream_gene_variant|MODIFIER|-169A>G|
98	5' UTR (1-265)	C|T|protein_coding|upstream_gene_variant|MODIFIER|-168C>T|
98	5' UTR (1-265)	C|A|protein_coding|upstream_gene_variant|MODIFIER|-168C>A|
99	5' UTR (1-265)	T|C|protein_coding|upstream_gene_variant|MODIFIER|-167T>C|
100	5' UTR (1-265)	C|T|protein_coding|upstream_gene_variant|MODIFIER|-166C>T|
100	5' UTR (1-265)	C|A|protein_coding|upstream_gene_variant|MODIFIER|-166C>A|
101	5' UTR (1-265)	G|A|protein_coding|upstream_gene_variant|MODIFIER|-165G>A|
102	5' UTR (1-265)	G|A|protein_coding|upstream_gene_variant|MODIFIER|-164G>A|
103	5' UTR (1-265)	C|T|protein_coding|upstream_gene_variant|MODIFIER|-163C>T|
104	5' UTR (1-265)	T|A|protein_coding|upstream_gene_variant|MODIFIER|-162T>A|
105	5' UTR (1-265)	G|T|protein_coding|upstream_gene_variant|MODIFIER|-161G>T|
105	5' UTR (1-265)	G|A|protein_coding|upstream_gene_variant|MODIFIER|-161G>A|
106	5' UTR (1-265)	C|T|protein_coding|upstream_gene_variant|MODIFIER|-160C>T|
106	5' UTR (1-265)	C|G|protein_coding|upstream_gene_variant|MODIFIER|-160C>G|
110	5' UTR (1-265)	C|T|protein_coding|upstream_gene_variant|MODIFIER|-156C>T|
111	5' UTR (1-265)	T|C|protein_coding|upstream_gene_variant|MODIFIER|-155T>C|
111	5' UTR (1-265)	T|A|protein_coding|upstream_gene_variant|MODIFIER|-155T>A|
112	5' UTR (1-265)	T|G|protein_coding|upstream_gene_variant|MODIFIER|-154T>G|
113	5' UTR (1-265)	A|G|protein_coding|upstream_gene_variant|MODIFIER|-153A>G|
114	5' UTR (1-265)	G|A|protein_coding|upstream_gene_variant|MODIFIER|-152G>A|
115	5' UTR (1-265)	T|C|protein_coding|upstream_gene_variant|MODIFIER|-151T>C|
116	5' UTR (1-265)	G|C|protein_coding|upstream_gene_variant|MODIFIER|-150G>C|
117	5' UTR (1-265)	C|T|protein_coding|upstream_gene_variant|MODIFIER|-149C>T|
118	5' UTR (1-265)	A|G|protein_coding|upstream_gene_variant|MODIFIER|-148A>G|
119	5' UTR (1-265)	C|T|protein_coding|upstream_gene_variant|MODIFIER|-147C>T|
119	5' UTR (1-265)	C|A|protein_coding|upstream_gene_variant|MODIFIER|-147C>A|
119	5' UTR (1-265)	C|G|protein_coding|upstream_gene_variant|MODIFIER|-147C>G|
120	5' UTR (1-265)	T|C|protein_coding|upstream_gene_variant|MODIFIER|-146T>C|
121	5' UTR (1-265)	C|A|protein_coding|upstream_gene_variant|MODIFIER|-145C>A|
121	5' UTR (1-265)	C|T|protein_coding|upstream_gene_variant|MODIFIER|-145C>T|
122	5' UTR (1-265)	A|G|protein_coding|upstream_gene_variant|MODIFIER|-144A>G|
123	5' UTR (1-265)	C|T|protein_coding|upstream_gene_variant|MODIFIER|-143C>T|
124	5' UTR (1-265)	G|A|protein_coding|upstream_gene_variant|MODIFIER|-142G>A|
125	5' UTR (1-265)	C|T|protein_coding|upstream_gene_variant|MODIFIER|-141C>T|
126	5' UTR (1-265)	A|T|protein_coding|upstream_gene_variant|MODIFIER|-140A>T|
127	5' UTR (1-265)	G|T|protein_coding|upstream_gene_variant|MODIFIER|-139G>T|
129	5' UTR (1-265)	A|G|protein_coding|upstream_gene_variant|MODIFIER|-137A>G|
134	5' UTR (1-265)	T|C|protein_coding|upstream_gene_variant|MODIFIER|-132T>C|
135	5' UTR (1-265)	A|G|protein_coding|upstream_gene_variant|MODIFIER|-131A>G|
136	5' UTR (1-265)	A|G|protein_coding|upstream_gene_variant|MODIFIER|-130A>G|
137	5' UTR (1-265)	T|C|protein_coding|upstream_gene_variant|MODIFIER|-129T>C|
139	5' UTR (1-265)	A|G|protein_coding|upstream_gene_variant|MODIFIER|-127A>G|
140	5' UTR (1-265)	C|T|protein_coding|upstream_gene_variant|MODIFIER|-126C>T|
140	5' UTR (1-265)	C|G|protein_coding|upstream_gene_variant|MODIFIER|-126C>G|
141	5' UTR (1-265)	T|C|protein_coding|upstream_gene_variant|MODIFIER|-125T>C|
142	5' UTR (1-265)	A|T|protein_coding|upstream_gene_variant|MODIFIER|-124A>T|
142	5' UTR (1-265)	A|G|protein_coding|upstream_gene_variant|MODIFIER|-124A>G|
143	5' UTR (1-265)	A|T|protein_coding|upstream_gene_variant|MODIFIER|-123A>T|
145	5' UTR (1-265)	T|C|protein_coding|upstream_gene_variant|MODIFIER|-121T>C|
146	5' UTR (1-265)	A|G|protein_coding|upstream_gene_variant|MODIFIER|-120A>G|
147	5' UTR (1-265)	C|A|protein_coding|upstream_gene_variant|MODIFIER|-119C>A|
147	5' UTR (1-265)	C|T|protein_coding|upstream_gene_variant|MODIFIER|-119C>T|
148	5' UTR (1-265)	T|A|protein_coding|upstream_gene_variant|MODIFIER|-118T>A|
149	5' UTR (1-265)	G|T|protein_coding|upstream_gene_variant|MODIFIER|-117G>T|
149	5' UTR (1-265)	G|A|protein_coding|upstream_gene_variant|MODIFIER|-117G>A|
150	5' UTR (1-265)	T|C|protein_coding|upstream_gene_variant|MODIFIER|-116T>C|
151	5' UTR (1-265)	C|T|protein_coding|upstream_gene_variant|MODIFIER|-115C>T|
153	5' UTR (1-265)	T|G|protein_coding|upstream_gene_variant|MODIFIER|-113T>G|
155	5' UTR (1-265)	G|T|protein_coding|upstream_gene_variant|MODIFIER|-111G>T|
156	5' UTR (1-265)	A|G|protein_coding|upstream_gene_variant|MODIFIER|-110A>G|
157	5' UTR (1-265)	C|T|protein_coding|upstream_gene_variant|MODIFIER|-109C>T|
158	5' UTR (1-265)	A|G|protein_coding|upstream_gene_variant|MODIFIER|-108A>G|
158	5' UTR (1-265)	A|T|protein_coding|upstream_gene_variant|MODIFIER|-108A>T|
158	5' UTR (1-265)	A|C|protein_coding|upstream_gene_variant|MODIFIER|-108A>C|
160	5' UTR (1-265)	G|A|protein_coding|upstream_gene_variant|MODIFIER|-106G>A|
160	5' UTR (1-265)	G|T|protein_coding|upstream_gene_variant|MODIFIER|-106G>T|
161	5' UTR (1-265)	A|T|protein_coding|upstream_gene_variant|MODIFIER|-105A>T|
161	5' UTR (1-265)	A|G|protein_coding|upstream_gene_variant|MODIFIER|-105A>G|
162	5' UTR (1-265)	C|T|protein_coding|upstream_gene_variant|MODIFIER|-104C>T|
163	5' UTR (1-265)	A|C|protein_coding|upstream_gene_variant|MODIFIER|-103A>C|
163	5' UTR (1-265)	A|G|protein_coding|upstream_gene_variant|MODIFIER|-103A>G|
164	5' UTR (1-265)	C|G|protein_coding|upstream_gene_variant|MODIFIER|-102C>G|
165	5' UTR (1-265)	G|A|protein_coding|upstream_gene_variant|MODIFIER|-101G>A|
167	5' UTR (1-265)	G|T|protein_coding|upstream_gene_variant|MODIFIER|-99G>T|
167	5' UTR (1-265)	G|C|protein_coding|upstream_gene_variant|MODIFIER|-99G>C|
167	5' UTR (1-265)	G|A|protein_coding|upstream_gene_variant|MODIFIER|-99G>A|
168	5' UTR (1-265)	T|A|protein_coding|upstream_gene_variant|MODIFIER|-98T>A|
169	5' UTR (1-265)	A|T|protein_coding|upstream_gene_variant|MODIFIER|-97A>T|
169	5' UTR (1-265)	A|G|protein_coding|upstream_gene_variant|MODIFIER|-97A>G|
170	5' UTR (1-265)	A|C|protein_coding|upstream_gene_variant|MODIFIER|-96A>C|
173	5' UTR (1-265)	C|T|protein_coding|upstream_gene_variant|MODIFIER|-93C>T|
174	5' UTR (1-265)	G|T|protein_coding|upstream_gene_variant|MODIFIER|-92G>T|
174	5' UTR (1-265)	G|A|protein_coding|upstream_gene_variant|MODIFIER|-92G>A|
174	5' UTR (1-265)	G|C|protein_coding|upstream_gene_variant|MODIFIER|-92G>C|
176	5' UTR (1-265)	C|T|protein_coding|upstream_gene_variant|MODIFIER|-90C>T|
177	5' UTR (1-265)	T|C|protein_coding|upstream_gene_variant|MODIFIER|-89T>C|
178	5' UTR (1-265)	A|G|protein_coding|upstream_gene_variant|MODIFIER|-88A>G|
178	5' UTR (1-265)	A|T|protein_coding|upstream_gene_variant|MODIFIER|-88A>T|
180	5' UTR (1-265)	C|T|protein_coding|upstream_gene_variant|MODIFIER|-86C>T|
181	5' UTR (1-265)	T|A|protein_coding|upstream_gene_variant|MODIFIER|-85T>A|
181	5' UTR (1-265)	T|C|protein_coding|upstream_gene_variant|MODIFIER|-85T>C|
183	5' UTR (1-265)	C|T|protein_coding|upstream_gene_variant|MODIFIER|-83C>T|
184	5' UTR (1-265)	T|G|protein_coding|upstream_gene_variant|MODIFIER|-82T>G|
185	5' UTR (1-265)	G|T|protein_coding|upstream_gene_variant|MODIFIER|-81G>T|
185	5' UTR (1-265)	G|A|protein_coding|upstream_gene_variant|MODIFIER|-81G>A|
185	5' UTR (1-265)	G|C|protein_coding|upstream_gene_variant|MODIFIER|-81G>C|
186	5' UTR (1-265)	C|T|protein_coding|upstream_gene_variant|MODIFIER|-80C>T|
186	5' UTR (1-265)	C|A|protein_coding|upstream_gene_variant|MODIFIER|-80C>A|
187	5' UTR (1-265)	A|G|protein_coding|upstream_gene_variant|MODIFIER|-79A>G|
188	5' UTR (1-265)	G|A|protein_coding|upstream_gene_variant|MODIFIER|-78G>A|
188	5' UTR (1-265)	G|T|protein_coding|upstream_gene_variant|MODIFIER|-78G>T|
189	5' UTR (1-265)	G|A|protein_coding|upstream_gene_variant|MODIFIER|-77G>A|
189	5' UTR (1-265)	G|T|protein_coding|upstream_gene_variant|MODIFIER|-77G>T|
190	5' UTR (1-265)	C|T|protein_coding|upstream_gene_variant|MODIFIER|-76C>T|
190	5' UTR (1-265)	C|G|protein_coding|upstream_gene_variant|MODIFIER|-76C>G|
191	5' UTR (1-265)	T|C|protein_coding|upstream_gene_variant|MODIFIER|-75T>C|
193	5' UTR (1-265)	C|T|protein_coding|upstream_gene_variant|MODIFIER|-73C>T|
194	5' UTR (1-265)	T|C|protein_coding|upstream_gene_variant|MODIFIER|-72T>C|
194	5' UTR (1-265)	T|G|protein_coding|upstream_gene_variant|MODIFIER|-72T>G|
195	5' UTR (1-265)	T|C|protein_coding|upstream_gene_variant|MODIFIER|-71T>C|
197	5' UTR (1-265)	C|T|protein_coding|upstream_gene_variant|MODIFIER|-69C>T|
197	5' UTR (1-265)	C|G|protein_coding|upstream_gene_variant|MODIFIER|-69C>G|
198	5' UTR (1-265)	G|A|protein_coding|upstream_gene_variant|MODIFIER|-68G>A|
198	5' UTR (1-265)	G|T|protein_coding|upstream_gene_variant|MODIFIER|-68G>T|
199	5' UTR (1-265)	G|T|protein_coding|upstream_gene_variant|MODIFIER|-67G>T|
199	5' UTR (1-265)	G|A|protein_coding|upstream_gene_variant|MODIFIER|-67G>A|
201	5' UTR (1-265)	T|C|protein_coding|upstream_gene_variant|MODIFIER|-65T>C|
202	5' UTR (1-265)	T|C|protein_coding|upstream_gene_variant|MODIFIER|-64T>C|
203	5' UTR (1-265)	C|T|protein_coding|upstream_gene_variant|MODIFIER|-63C>T|
204	5' UTR (1-265)	G|T|protein_coding|upstream_gene_variant|MODIFIER|-62G>T|
204	5' UTR (1-265)	G|A|protein_coding|upstream_gene_variant|MODIFIER|-62G>A|
204	5' UTR (1-265)	G|C|protein_coding|upstream_gene_variant|MODIFIER|-62G>C|
205	5' UTR (1-265)	T|C|protein_coding|upstream_gene_variant|MODIFIER|-61T>C|
206	5' UTR (1-265)	C|T|protein_coding|upstream_gene_variant|MODIFIER|-60C>T|
207	5' UTR (1-265)	C|T|protein_coding|upstream_gene_variant|MODIFIER|-59C>T|
208	5' UTR (1-265)	G|T|protein_coding|upstream_gene_variant|MODIFIER|-58G>T|
210	5' UTR (1-265)	G|T|protein_coding|upstream_gene_variant|MODIFIER|-56G>T|
210	5' UTR (1-265)	G|A|protein_coding|upstream_gene_variant|MODIFIER|-56G>A|
211	5' UTR (1-265)	T|C|protein_coding|upstream_gene_variant|MODIFIER|-55T>C|
212	5' UTR (1-265)	T|C|protein_coding|upstream_gene_variant|MODIFIER|-54T>C|
212	5' UTR (1-265)	T|A|protein_coding|upstream_gene_variant|MODIFIER|-54T>A|
213	5' UTR (1-265)	G|A|protein_coding|upstream_gene_variant|MODIFIER|-53G>A|
213	5' UTR (1-265)	G|T|protein_coding|upstream_gene_variant|MODIFIER|-53G>T|
215	5' UTR (1-265)	A|T|protein_coding|upstream_gene_variant|MODIFIER|-51A>T|
216	5' UTR (1-265)	G|T|protein_coding|upstream_gene_variant|MODIFIER|-50G>T|
216	5' UTR (1-265)	G|A|protein_coding|upstream_gene_variant|MODIFIER|-50G>A|
217	5' UTR (1-265)	C|T|protein_coding|upstream_gene_variant|MODIFIER|-49C>T|
218	5' UTR (1-265)	C|T|protein_coding|upstream_gene_variant|MODIFIER|-48C>T|
219	5' UTR (1-265)	G|T|protein_coding|upstream_gene_variant|MODIFIER|-47G>T|
219	5' UTR (1-265)	G|A|protein_coding|upstream_gene_variant|MODIFIER|-47G>A|
221	5' UTR (1-265)	T|G|protein_coding|upstream_gene_variant|MODIFIER|-45T>G|
221	5' UTR (1-265)	T|C|protein_coding|upstream_gene_variant|MODIFIER|-45T>C|
222	5' UTR (1-265)	C|T|protein_coding|upstream_gene_variant|MODIFIER|-44C>T|
223	5' UTR (1-265)	A|T|protein_coding|upstream_gene_variant|MODIFIER|-43A>T|
223	5' UTR (1-265)	A|G|protein_coding|upstream_gene_variant|MODIFIER|-43A>G|
224	5' UTR (1-265)	T|A|protein_coding|upstream_gene_variant|MODIFIER|-42T>A|
224	5' UTR (1-265)	T|C|protein_coding|upstream_gene_variant|MODIFIER|-42T>C|
225	5' UTR (1-265)	C|T|protein_coding|upstream_gene_variant|MODIFIER|-41C>T|
226	5' UTR (1-265)	A|G|protein_coding|upstream_gene_variant|MODIFIER|-40A>G|
227	5' UTR (1-265)	G|A|protein_coding|upstream_gene_variant|MODIFIER|-39G>A|
227	5' UTR (1-265)	G|C|protein_coding|upstream_gene_variant|MODIFIER|-39G>C|
228	5' UTR (1-265)	C|T|protein_coding|upstream_gene_variant|MODIFIER|-38C>T|
229	5' UTR (1-265)	A|C|protein_coding|upstream_gene_variant|MODIFIER|-37A>C|
231	5' UTR (1-265)	A|G|protein_coding|upstream_gene_variant|MODIFIER|-35A>G|
231	5' UTR (1-265)	A|T|protein_coding|upstream_gene_variant|MODIFIER|-35A>T|
232	5' UTR (1-265)	T|C|protein_coding|upstream_gene_variant|MODIFIER|-34T>C|
232	5' UTR (1-265)	T|G|protein_coding|upstream_gene_variant|MODIFIER|-34T>G|
233	5' UTR (1-265)	C|A|protein_coding|upstream_gene_variant|MODIFIER|-33C>A|
233	5' UTR (1-265)	C|T|protein_coding|upstream_gene_variant|MODIFIER|-33C>T|
235	5' UTR (1-265)	A|G|protein_coding|upstream_gene_variant|MODIFIER|-31A>G|
236	5' UTR (1-265)	G|A|protein_coding|upstream_gene_variant|MODIFIER|-30G>A|
237	5' UTR (1-265)	G|T|protein_coding|upstream_gene_variant|MODIFIER|-29G>T|
237	5' UTR (1-265)	G|A|protein_coding|upstream_gene_variant|MODIFIER|-29G>A|
238	5' UTR (1-265)	T|A|protein_coding|upstream_gene_variant|MODIFIER|-28T>A|
239	5' UTR (1-265)	T|A|protein_coding|upstream_gene_variant|MODIFIER|-27T>A|
239	5' UTR (1-265)	T|C|protein_coding|upstream_gene_variant|MODIFIER|-27T>C|
240	5' UTR (1-265)	T|C|protein_coding|upstream_gene_variant|MODIFIER|-26T>C|
241	5' UTR (1-265)	C|T|protein_coding|upstream_gene_variant|MODIFIER|-25C>T|
242	5' UTR (1-265)	G|T|protein_coding|upstream_gene_variant|MODIFIER|-24G>T|
242	5' UTR (1-265)	G|A|protein_coding|upstream_gene_variant|MODIFIER|-24G>A|
243	5' UTR (1-265)	T|A|protein_coding|upstream_gene_variant|MODIFIER|-23T>A|
244	5' UTR (1-265)	C|A|protein_coding|upstream_gene_variant|MODIFIER|-22C>A|
244	5' UTR (1-265)	C|T|protein_coding|upstream_gene_variant|MODIFIER|-22C>T|
245	5' UTR (1-265)	C|A|protein_coding|upstream_gene_variant|MODIFIER|-21C>A|
246	5' UTR (1-265)	G|T|protein_coding|upstream_gene_variant|MODIFIER|-20G>T|
247	5' UTR (1-265)	G|A|protein_coding|upstream_gene_variant|MODIFIER|-19G>A|
247	5' UTR (1-265)	G|T|protein_coding|upstream_gene_variant|MODIFIER|-19G>T|
249	5' UTR (1-265)	T|C|protein_coding|upstream_gene_variant|MODIFIER|-17T>C|
251	5' UTR (1-265)	T|C|protein_coding|upstream_gene_variant|MODIFIER|-15T>C|
252	5' UTR (1-265)	G|T|protein_coding|upstream_gene_variant|MODIFIER|-14G>T|
252	5' UTR (1-265)	G|A|protein_coding|upstream_gene_variant|MODIFIER|-14G>A|
253	5' UTR (1-265)	A|G|protein_coding|upstream_gene_variant|MODIFIER|-13A>G|
256	5' UTR (1-265)	G|A|protein_coding|upstream_gene_variant|MODIFIER|-10G>A|
256	5' UTR (1-265)	G|T|protein_coding|upstream_gene_variant|MODIFIER|-10G>T|
257	5' UTR (1-265)	A|T|protein_coding|upstream_gene_variant|MODIFIER|-9A>T|
257	5' UTR (1-265)	A|G|protein_coding|upstream_gene_variant|MODIFIER|-9A>G|
258	5' UTR (1-265)	A|C|protein_coding|upstream_gene_variant|MODIFIER|-8A>C|
259	5' UTR (1-265)	A|G|protein_coding|upstream_gene_variant|MODIFIER|-7A>G|
260	5' UTR (1-265)	G|A|protein_coding|upstream_gene_variant|MODIFIER|-6G>A|
260	5' UTR (1-265)	G|C|protein_coding|upstream_gene_variant|MODIFIER|-6G>C|
261	5' UTR (1-265)	G|C|protein_coding|upstream_gene_variant|MODIFIER|-5G>C|
262	5' UTR (1-265)	T|C|protein_coding|upstream_gene_variant|MODIFIER|-4T>C|
263	5' UTR (1-265)	A|G|protein_coding|upstream_gene_variant|MODIFIER|-3A>G|
269	nsp1 (266-806)	G|A|protein_coding|missense_variant|MODERATE|4G>A|Glu2Lys
270	nsp1 (266-806)	A|G|protein_coding|missense_variant|MODERATE|5A>G|Glu2Gly
271	nsp1 (266-806)	G|T|protein_coding|missense_variant|MODERATE|6G>T|Glu2Asp
271	nsp1 (266-806)	G|A|protein_coding|synonymous_variant|LOW|6G>A|Glu2Glu
272	nsp1 (266-806)	A|G|protein_coding|missense_variant|MODERATE|7A>G|Ser3Gly
273	nsp1 (266-806)	G|A|protein_coding|missense_variant|MODERATE|8G>A|Ser3Asn
274	nsp1 (266-806)	C|T|protein_coding|synonymous_variant|LOW|9C>T|Ser3Ser
274	nsp1 (266-806)	C|A|protein_coding|missense_variant|MODERATE|9C>A|Ser3Arg
280	nsp1 (266-806)	C|T|protein_coding|synonymous_variant|LOW|15C>T|Val5Val
283	nsp1 (266-806)	T|C|protein_coding|synonymous_variant|LOW|18T>C|Pro6Pro
284	nsp1 (266-806)	G|T|protein_coding|missense_variant|MODERATE|19G>T|Gly7Cys
284	nsp1 (266-806)	G|A|protein_coding|missense_variant|MODERATE|19G>A|Gly7Ser
285	nsp1 (266-806)	G|A|protein_coding|missense_variant|MODERATE|20G>A|Gly7Asp
285	nsp1 (266-806)	G|C|protein_coding|missense_variant|MODERATE|20G>C|Gly7Ala
285	nsp1 (266-806)	G|T|protein_coding|missense_variant|MODERATE|20G>T|Gly7Val
287	nsp1 (266-806)	T|G|protein_coding|missense_variant|MODERATE|22T>G|Phe8Val
287	nsp1 (266-806)	T|C|protein_coding|missense_variant|MODERATE|22T>C|Phe8Leu
288	nsp1 (266-806)	T|G|protein_coding|missense_variant|MODERATE|23T>G|Phe8Cys
289	nsp1 (266-806)	C|A|protein_coding|missense_variant|MODERATE|24C>A|Phe8Leu
290	nsp1 (266-806)	A|T|protein_coding|missense_variant|MODERATE|25A>T|Asn9Tyr
292	nsp1 (266-806)	C|T|protein_coding|synonymous_variant|LOW|27C>T|Asn9Asn
293	nsp1 (266-806)	G|A|protein_coding|missense_variant|MODERATE|28G>A|Glu10Lys
295	nsp1 (266-806)	G|A|protein_coding|synonymous_variant|LOW|30G>A|Glu10Glu
301	nsp1 (266-806)	A|G|protein_coding|synonymous_variant|LOW|36A>G|Thr12Thr
302	nsp1 (266-806)	C|T|protein_coding|missense_variant|MODERATE|37C>T|His13Tyr
304	nsp1 (266-806)	C|T|protein_coding|synonymous_variant|LOW|39C>T|His13His
307	nsp1 (266-806)	C|T|protein_coding|synonymous_variant|LOW|42C>T|Val14Val
309	nsp1 (266-806)	A|T|protein_coding|missense_variant|MODERATE|44A>T|Gln15Leu
313	nsp1 (266-806)	C|T|protein_coding|synonymous_variant|LOW|48C>T|Leu16Leu
314	nsp1 (266-806)	A|T|protein_coding|missense_variant|MODERATE|49A>T|Ser17Cys
315	nsp1 (266-806)	G|T|protein_coding|missense_variant|MODERATE|50G>T|Ser17Ile
319	nsp1 (266-806)	G|A|protein_coding|synonymous_variant|LOW|54G>A|Leu18Leu
319	nsp1 (266-806)	G|T|protein_coding|missense_variant|MODERATE|54G>T|Leu18Phe
327	nsp1 (266-806)	T|C|protein_coding|missense_variant|MODERATE|62T>C|Leu21Ser
331	nsp1 (266-806)	G|A|protein_coding|synonymous_variant|LOW|66G>A|Gln22Gln
332	nsp1 (266-806)	G|T|protein_coding|missense_variant|MODERATE|67G>T|Val23Phe
333	nsp1 (266-806)	T|C|protein_coding|missense_variant|MODERATE|68T>C|Val23Ala
334	nsp1 (266-806)	T|C|protein_coding|synonymous_variant|LOW|69T>C|Val23Val
337	nsp1 (266-806)	C|T|protein_coding|synonymous_variant|LOW|72C>T|Arg24Arg
338	nsp1 (266-806)	G|A|protein_coding|missense_variant|MODERATE|73G>A|Asp25Asn
339	nsp1 (266-806)	A|G|protein_coding|missense_variant|MODERATE|74A>G|Asp25Gly
340	nsp1 (266-806)	C|T|protein_coding|synonymous_variant|LOW|75C>T|Asp25Asp
343	nsp1 (266-806)	G|T|protein_coding|synonymous_variant|LOW|78G>T|Val26Val
344	nsp1 (266-806)	C|T|protein_coding|missense_variant|MODERATE|79C>T|Leu27Phe
345	nsp1 (266-806)	T|G|protein_coding|missense_variant|MODERATE|80T>G|Leu27Arg
345	nsp1 (266-806)	T|C|protein_coding|missense_variant|MODERATE|80T>C|Leu27Pro
346	nsp1 (266-806)	C|T|protein_coding|synonymous_variant|LOW|81C>T|Leu27Leu
347	nsp1 (266-806)	G|A|protein_coding|missense_variant|MODERATE|82G>A|Val28Ile
348	nsp1 (266-806)	T|A|protein_coding|missense_variant|MODERATE|83T>A|Val28Glu
350	nsp1 (266-806)	C|T|protein_coding|missense_variant|MODERATE|85C>T|Arg29Cys
351	nsp1 (266-806)	G|A|protein_coding|missense_variant|MODERATE|86G>A|Arg29His
353	nsp1 (266-806)	G|A|protein_coding|missense_variant|MODERATE|88G>A|Gly30Ser
353	nsp1 (266-806)	G|T|protein_coding|missense_variant|MODERATE|88G>T|Gly30Cys
354	nsp1 (266-806)	G|A|protein_coding|missense_variant|MODERATE|89G>A|Gly30Asp
355	nsp1 (266-806)	C|T|protein_coding|synonymous_variant|LOW|90C>T|Gly30Gly
356	nsp1 (266-806)	T|C|protein_coding|missense_variant|MODERATE|91T>C|Phe31Leu
356	nsp1 (266-806)	T|G|protein_coding|missense_variant|MODERATE|91T>G|Phe31Val
358	nsp1 (266-806)	T|A|protein_coding|missense_variant|MODERATE|93T>A|Phe31Leu
358	nsp1 (266-806)	T|C|protein_coding|synonymous_variant|LOW|93T>C|Phe31Phe
360	nsp1 (266-806)	G|A|protein_coding|missense_variant|MODERATE|95G>A|Gly32Glu
361	nsp1 (266-806)	A|G|protein_coding|synonymous_variant|LOW|96A>G|Gly32Gly
362	nsp1 (266-806)	G|A|protein_coding|missense_variant|MODERATE|97G>A|Asp33Asn
363	nsp1 (266-806)	A|G|protein_coding|missense_variant|MODERATE|98A>G|Asp33Gly
364	nsp1 (266-806)	C|A|protein_coding|missense_variant|MODERATE|99C>A|Asp33Glu
364	nsp1 (266-806)	C|T|protein_coding|synonymous_variant|LOW|99C>T|Asp33Asp
366	nsp1 (266-806)	C|T|protein_coding|missense_variant|MODERATE|101C>T|Ser34Phe
367	nsp1 (266-806)	C|T|protein_coding|synonymous_variant|LOW|102C>T|Ser34Ser
368	nsp1 (266-806)	G|T|protein_coding|missense_variant|MODERATE|103G>T|Val35Leu
368	nsp1 (266-806)	G|A|protein_coding|missense_variant|MODERATE|103G>A|Val35Met
370	nsp1 (266-806)	G|T|protein_coding|synonymous_variant|LOW|105G>T|Val35Val
370	nsp1 (266-806)	G|A|protein_coding|synonymous_variant|LOW|105G>A|Val35Val
371	nsp1 (266-806)	G|T|protein_coding|stop_gained|HIGH|106G>T|Glu36*
372	nsp1 (266-806)	A|C|protein_coding|missense_variant|MODERATE|107A>C|Glu36Ala
373	nsp1 (266-806)	G|A|protein_coding|synonymous_variant|LOW|108G>A|Glu36Glu
373	nsp1 (266-806)	G|T|protein_coding|missense_variant|MODERATE|108G>T|Glu36Asp
374	nsp1 (266-806)	G|A|protein_coding|missense_variant|MODERATE|109G>A|Glu37Lys
375	nsp1 (266-806)	A|G|protein_coding|missense_variant|MODERATE|110A>G|Glu37Gly
376	nsp1 (266-806)	G|T|protein_coding|missense_variant|MODERATE|111G>T|Glu37Asp
376	nsp1 (266-806)	G|A|protein_coding|synonymous_variant|LOW|111G>A|Glu37Glu
376	nsp1 (266-806)	G|C|protein_coding|missense_variant|MODERATE|111G>C|Glu37Asp
377	nsp1 (266-806)	G|T|protein_coding|missense_variant|MODERATE|112G>T|Val38Phe
378	nsp1 (266-806)	T|C|protein_coding|missense_variant|MODERATE|113T>C|Val38Ala
379	nsp1 (266-806)	C|A|protein_coding|synonymous_variant|LOW|114C>A|Val38Val
379	nsp1 (266-806)	C|G|protein_coding|synonymous_variant|LOW|114C>G|Val38Val
381	nsp1 (266-806)	T|G|protein_coding|stop_gained|HIGH|116T>G|Leu39*
381	nsp1 (266-806)	T|C|protein_coding|missense_variant|MODERATE|116T>C|Leu39Ser
383	nsp1 (266-806)	T|C|protein_coding|missense_variant|MODERATE|118T>C|Ser40Pro
383	nsp1 (266-806)	T|A|protein_coding|missense_variant|MODERATE|118T>A|Ser40Thr
385	nsp1 (266-806)	A|G|protein_coding|synonymous_variant|LOW|120A>G|Ser40Ser
385	nsp1 (266-806)	A|T|protein_coding|synonymous_variant|LOW|120A>T|Ser40Ser
387	nsp1 (266-806)	A|G|protein_coding|missense_variant|MODERATE|122A>G|Glu41Gly
391	nsp1 (266-806)	A|G|protein_coding|synonymous_variant|LOW|126A>G|Ala42Ala
391	nsp1 (266-806)	A|T|protein_coding|synonymous_variant|LOW|126A>T|Ala42Ala
392	nsp1 (266-806)	C|T|protein_coding|missense_variant|MODERATE|127C>T|Arg43Cys
393	nsp1 (266-806)	G|A|protein_coding|missense_variant|MODERATE|128G>A|Arg43His
393	nsp1 (266-806)	G|T|protein_coding|missense_variant|MODERATE|128G>T|Arg43Leu
394	nsp1 (266-806)	T|C|protein_coding|synonymous_variant|LOW|129T>C|Arg43Arg
395	nsp1 (266-806)	C|T|protein_coding|stop_gained|HIGH|130C>T|Gln44*
398	nsp1 (266-806)	C|T|protein_coding|missense_variant|MODERATE|133C>T|His45Tyr
400	nsp1 (266-806)	T|C|protein_coding|synonymous_variant|LOW|135T>C|His45His
404	nsp1 (266-806)	A|T|protein_coding|stop_gained|HIGH|139A>T|Lys47*
406	nsp1 (266-806)	A|G|protein_coding|synonymous_variant|LOW|141A>G|Lys47Lys
409	nsp1 (266-806)	T|C|protein_coding|synonymous_variant|LOW|144T>C|Asp48Asp
412	nsp1 (266-806)	C|G|protein_coding|synonymous_variant|LOW|147C>G|Gly49Gly
414	nsp1 (266-806)	C|T|protein_coding|missense_variant|MODERATE|149C>T|Thr50Ile
415	nsp1 (266-806)	T|G|protein_coding|synonymous_variant|LOW|150T>G|Thr50Thr
419	nsp1 (266-806)	G|A|protein_coding|missense_variant|MODERATE|154G>A|Gly52Ser
419	nsp1 (266-806)	G|T|protein_coding|missense_variant|MODERATE|154G>T|Gly52Cys
421	nsp1 (266-806)	C|T|protein_coding|synonymous_variant|LOW|156C>T|Gly52Gly
421	nsp1 (266-806)	C|A|protein_coding|synonymous_variant|LOW|156C>A|Gly52Gly
422	nsp1 (266-806)	T|G|protein_coding|missense_variant|MODERATE|157T>G|Leu53Val
422	nsp1 (266-806)	T|C|protein_coding|synonymous_variant|LOW|157T>C|Leu53Leu
425	nsp1 (266-806)	G|A|protein_coding|missense_variant|MODERATE|160G>A|Val54Ile
426	nsp1 (266-806)	T|C|protein_coding|missense_variant|MODERATE|161T>C|Val54Ala
427	nsp1 (266-806)	A|T|protein_coding|synonymous_variant|LOW|162A>T|Val54Val
428	nsp1 (266-806)	G|A|protein_coding|missense_variant|MODERATE|163G>A|Glu55Lys
431	nsp1 (266-806)	G|A|protein_coding|missense_variant|MODERATE|166G>A|Val56Ile
431	nsp1 (266-806)	G|T|protein_coding|missense_variant|MODERATE|166G>T|Val56Phe
432	nsp1 (266-806)	T|C|protein_coding|missense_variant|MODERATE|167T>C|Val56Ala
433	nsp1 (266-806)	T|C|protein_coding|synonymous_variant|LOW|168T>C|Val56Val
433	nsp1 (266-806)	T|A|protein_coding|synonymous_variant|LOW|168T>A|Val56Val
435	nsp1 (266-806)	A|G|protein_coding|missense_variant|MODERATE|170A>G|Glu57Gly
436	nsp1 (266-806)	A|C|protein_coding|missense_variant|MODERATE|171A>C|Glu57Asp
438	nsp1 (266-806)	A|G|protein_coding|missense_variant|MODERATE|173A>G|Lys58Arg
439	nsp1 (266-806)	A|G|protein_coding|synonymous_variant|LOW|174A>G|Lys58Lys
441	nsp1 (266-806)	G|A|protein_coding|missense_variant|MODERATE|176G>A|Gly59Asp
442	nsp1 (266-806)	C|T|protein_coding|synonymous_variant|LOW|177C>T|Gly59Gly
443	nsp1 (266-806)	G|A|protein_coding|missense_variant|MODERATE|178G>A|Val60Ile
443	nsp1 (266-806)	G|T|protein_coding|missense_variant|MODERATE|178G>T|Val60Phe
444	nsp1 (266-806)	T|C|protein_coding|missense_variant|MODERATE|179T>C|Val60Ala
445	nsp1 (266-806)	T|C|protein_coding|synonymous_variant|LOW|180T>C|Val60Val
446	nsp1 (266-806)	T|C|protein_coding|synonymous_variant|LOW|181T>C|Leu61Leu
447	nsp1 (266-806)	T|G|protein_coding|missense_variant|MODERATE|182T>G|Leu61Trp
449	nsp1 (266-806)	C|T|protein_coding|missense_variant|MODERATE|184C>T|Pro62Ser
450	nsp1 (266-806)	C|T|protein_coding|missense_variant|MODERATE|185C>T|Pro62Leu
454	nsp1 (266-806)	A|G|protein_coding|synonymous_variant|LOW|189A>G|Gln63Gln
454	nsp1 (266-806)	A|C|protein_coding|missense_variant|MODERATE|189A>C|Gln63His
455	nsp1 (266-806)	C|T|protein_coding|missense_variant|MODERATE|190C>T|Leu64Phe
457	nsp1 (266-806)	T|C|protein_coding|synonymous_variant|LOW|192T>C|Leu64Leu
457	nsp1 (266-806)	T|A|protein_coding|synonymous_variant|LOW|192T>A|Leu64Leu
458	nsp1 (266-806)	G|C|protein_coding|missense_variant|MODERATE|193G>C|Glu65Gln
459	nsp1 (266-806)	A|G|protein_coding|missense_variant|MODERATE|194A>G|Glu65Gly
459	nsp1 (266-806)	A|T|protein_coding|missense_variant|MODERATE|194A>T|Glu65Val
460	nsp1 (266-806)	A|G|protein_coding|synonymous_variant|LOW|195A>G|Glu65Glu
462	nsp1 (266-806)	A|G|protein_coding|missense_variant|MODERATE|197A>G|Gln66Arg
463	nsp1 (266-806)	G|T|protein_coding|missense_variant|MODERATE|198G>T|Gln66His
466	nsp1 (266-806)	C|T|protein_coding|synonymous_variant|LOW|201C>T|Pro67Pro
466	nsp1 (266-806)	C|A|protein_coding|synonymous_variant|LOW|201C>A|Pro67Pro
467	nsp1 (266-806)	T|C|protein_coding|missense_variant|MODERATE|202T>C|Tyr68His
469	nsp1 (266-806)	T|C|protein_coding|synonymous_variant|LOW|204T>C|Tyr68Tyr
469	nsp1 (266-806)	T|A|protein_coding|stop_gained|HIGH|204T>A|Tyr68*
472	nsp1 (266-806)	G|T|protein_coding|synonymous_variant|LOW|207G>T|Val69Val
472	nsp1 (266-806)	G|C|protein_coding|synonymous_variant|LOW|207G>C|Val69Val
475	nsp1 (266-806)	C|T|protein_coding|synonymous_variant|LOW|210C>T|Phe70Phe
476	nsp1 (266-806)	A|G|protein_coding|missense_variant|MODERATE|211A>G|Ile71Val
478	nsp1 (266-806)	C|T|protein_coding|synonymous_variant|LOW|213C>T|Ile71Ile
479	nsp1 (266-806)	A|G|protein_coding|missense_variant|MODERATE|214A>G|Lys72Glu
481	nsp1 (266-806)	A|G|protein_coding|synonymous_variant|LOW|216A>G|Lys72Lys
482	nsp1 (266-806)	C|T|protein_coding|missense_variant|MODERATE|217C>T|Arg73Cys
484	nsp1 (266-806)	T|C|protein_coding|synonymous_variant|LOW|219T>C|Arg73Arg
485	nsp1 (266-806)	T|G|protein_coding|missense_variant|MODERATE|220T>G|Ser74Ala
485	nsp1 (266-806)	T|C|protein_coding|missense_variant|MODERATE|220T>C|Ser74Pro
486	nsp1 (266-806)	C|T|protein_coding|missense_variant|MODERATE|221C>T|Ser74Leu
487	nsp1 (266-806)	G|A|protein_coding|synonymous_variant|LOW|222G>A|Ser74Ser
487	nsp1 (266-806)	G|T|protein_coding|synonymous_variant|LOW|222G>T|Ser74Ser
490	nsp1 (266-806)	T|A|protein_coding|missense_variant|MODERATE|225T>A|Asp75Glu
490	nsp1 (266-806)	T|C|protein_coding|synonymous_variant|LOW|225T>C|Asp75Asp
491	nsp1 (266-806)	G|A|protein_coding|missense_variant|MODERATE|226G>A|Ala76Thr
492	nsp1 (266-806)	C|T|protein_coding|missense_variant|MODERATE|227C>T|Ala76Val
493	nsp1 (266-806)	T|C|protein_coding|synonymous_variant|LOW|228T>C|Ala76Ala
495	nsp1 (266-806)	G|T|protein_coding|missense_variant|MODERATE|230G>T|Arg77Leu
495	nsp1 (266-806)	G|A|protein_coding|missense_variant|MODERATE|230G>A|Arg77Gln
496	nsp1 (266-806)	A|G|protein_coding|synonymous_variant|LOW|231A>G|Arg77Arg
497	nsp1 (266-806)	A|G|protein_coding|missense_variant|MODERATE|232A>G|Thr78Ala
498	nsp1 (266-806)	C|T|protein_coding|missense_variant|MODERATE|233C>T|Thr78Ile
501	nsp1 (266-806)	C|T|protein_coding|missense_variant|MODERATE|236C>T|Ala79Val
503	nsp1 (266-806)	C|T|protein_coding|missense_variant|MODERATE|238C>T|Pro80Ser
505	nsp1 (266-806)	T|C|protein_coding|synonymous_variant|LOW|240T>C|Pro80Pro
506	nsp1 (266-806)	C|T|protein_coding|missense_variant|MODERATE|241C>T|His81Tyr
507	nsp1 (266-806)	A|G|protein_coding|missense_variant|MODERATE|242A>G|His81Arg
508	nsp1 (266-806)	T|C|protein_coding|synonymous_variant|LOW|243T>C|His81His
509	nsp1 (266-806)	G|A|protein_coding|missense_variant|MODERATE|244G>A|Gly82Ser
510	nsp1 (266-806)	G|A|protein_coding|missense_variant|MODERATE|245G>A|Gly82Asp
511	nsp1 (266-806)	T|C|protein_coding|synonymous_variant|LOW|246T>C|Gly82Gly
511	nsp1 (266-806)	T|A|protein_coding|synonymous_variant|LOW|246T>A|Gly82Gly
512	nsp1 (266-806)	C|T|protein_coding|missense_variant|MODERATE|247C>T|His83Tyr
512	nsp1 (266-806)	C|A|protein_coding|missense_variant|MODERATE|247C>A|His83Asn
513	nsp1 (266-806)	A|G|protein_coding|missense_variant|MODERATE|248A>G|His83Arg
514	nsp1 (266-806)	T|C|protein_coding|synonymous_variant|LOW|249T>C|His83His
515	nsp1 (266-806)	G|A|protein_coding|missense_variant|MODERATE|250G>A|Val84Ile
518	nsp1 (266-806)	A|G|protein_coding|missense_variant|MODERATE|253A>G|Met85Val
519	nsp1 (266-806)	T|A|protein_coding|missense_variant|MODERATE|254T>A|Met85Lys
520	nsp1 (266-806)	G|T|protein_coding|missense_variant|MODERATE|255G>T|Met85Ile
520	nsp1 (266-806)	G|A|protein_coding|missense_variant|MODERATE|255G>A|Met85Ile
521	nsp1 (266-806)	G|T|protein_coding|missense_variant|MODERATE|256G>T|Val86Phe
523	nsp1 (266-806)	T|C|protein_coding|synonymous_variant|LOW|258T>C|Val86Val
523	nsp1 (266-806)	T|A|protein_coding|synonymous_variant|LOW|258T>A|Val86Val
524	nsp1 (266-806)	G|A|protein_coding|missense_variant|MODERATE|259G>A|Glu87Lys
525	nsp1 (266-806)	A|G|protein_coding|missense_variant|MODERATE|260A>G|Glu87Gly
526	nsp1 (266-806)	G|T|protein_coding|missense_variant|MODERATE|261G>T|Glu87Asp
526	nsp1 (266-806)	G|A|protein_coding|synonymous_variant|LOW|261G>A|Glu87Glu
527	nsp1 (266-806)	C|T|protein_coding|synonymous_variant|LOW|262C>T|Leu88Leu
529	nsp1 (266-806)	G|T|protein_coding|synonymous_variant|LOW|264G>T|Leu88Leu
529	nsp1 (266-806)	G|A|protein_coding|synonymous_variant|LOW|264G>A|Leu88Leu
530	nsp1 (266-806)	G|A|protein_coding|missense_variant|MODERATE|265G>A|Val89Ile
532	nsp1 (266-806)	A|T|protein_coding|synonymous_variant|LOW|267A>T|Val89Val
532	nsp1 (266-806)	A|G|protein_coding|synonymous_variant|LOW|267A>G|Val89Val
534	nsp1 (266-806)	C|T|protein_coding|missense_variant|MODERATE|269C>T|Ala90Val
535	nsp1 (266-806)	A|G|protein_coding|synonymous_variant|LOW|270A>G|Ala90Ala
538	nsp1 (266-806)	A|T|protein_coding|missense_variant|MODERATE|273A>T|Glu91Asp
539	nsp1 (266-806)	C|T|protein_coding|missense_variant|MODERATE|274C>T|Leu92Phe
539	nsp1 (266-806)	C|A|protein_coding|missense_variant|MODERATE|274C>A|Leu92Ile
540	nsp1 (266-806)	T|A|protein_coding|missense_variant|MODERATE|275T>A|Leu92His
541	nsp1 (266-806)	C|T|protein_coding|synonymous_variant|LOW|276C>T|Leu92Leu
542	nsp1 (266-806)	G|A|protein_coding|missense_variant|MODERATE|277G>A|Glu93Lys
542	nsp1 (266-806)	G|T|protein_coding|stop_gained|HIGH|277G>T|Glu93*
544	nsp1 (266-806)	A|G|protein_coding|synonymous_variant|LOW|279A>G|Glu93Glu
544	nsp1 (266-806)	A|T|protein_coding|missense_variant|MODERATE|279A>T|Glu93Asp
545	nsp1 (266-806)	G|T|protein_coding|missense_variant|MODERATE|280G>T|Gly94Cys
545	nsp1 (266-806)	G|A|protein_coding|missense_variant|MODERATE|280G>A|Gly94Ser
547	nsp1 (266-806)	C|T|protein_coding|synonymous_variant|LOW|282C>T|Gly94Gly
548	nsp1 (266-806)	A|G|protein_coding|missense_variant|MODERATE|283A>G|Ile95Val
549	nsp1 (266-806)	T|C|protein_coding|missense_variant|MODERATE|284T>C|Ile95Thr
550	nsp1 (266-806)	T|C|protein_coding|synonymous_variant|LOW|285T>C|Ile95Ile
553	nsp1 (266-806)	G|T|protein_coding|missense_variant|MODERATE|288G>T|Gln96His
555	nsp1 (266-806)	A|G|protein_coding|missense_variant|MODERATE|290A>G|Tyr97Cys
558	nsp1 (266-806)	G|T|protein_coding|missense_variant|MODERATE|293G>T|Gly98Val
559	nsp1 (266-806)	T|C|protein_coding|synonymous_variant|LOW|294T>C|Gly98Gly
560	nsp1 (266-806)	C|T|protein_coding|missense_variant|MODERATE|295C>T|Arg99Cys
561	nsp1 (266-806)	G|A|protein_coding|missense_variant|MODERATE|296G>A|Arg99His
562	nsp1 (266-806)	T|A|protein_coding|synonymous_variant|LOW|297T>A|Arg99Arg
563	nsp1 (266-806)	A|T|protein_coding|missense_variant|MODERATE|298A>T|Ser100Cys
564	nsp1 (266-806)	G|A|protein_coding|missense_variant|MODERATE|299G>A|Ser100Asn
565	nsp1 (266-806)	T|C|protein_coding|synonymous_variant|LOW|300T>C|Ser100Ser
566	nsp1 (266-806)	G|A|protein_coding|missense_variant|MODERATE|301G>A|Gly101Ser
568	nsp1 (266-806)	T|C|protein_coding|synonymous_variant|LOW|303T>C|Gly101Gly
568	nsp1 (266-806)	T|A|protein_coding|synonymous_variant|LOW|303T>A|Gly101Gly
570	nsp1 (266-806)	A|G|protein_coding|missense_variant|MODERATE|305A>G|Glu102Gly
573	nsp1 (266-806)	C|T|protein_coding|missense_variant|MODERATE|308C>T|Thr103Ile
574	nsp1 (266-806)	A|G|protein_coding|synonymous_variant|LOW|309A>G|Thr103Thr
575	nsp1 (266-806)	C|T|protein_coding|missense_variant|MODERATE|310C>T|Leu104Phe
575	nsp1 (266-806)	C|A|protein_coding|missense_variant|MODERATE|310C>A|Leu104Ile
576	nsp1 (266-806)	T|A|protein_coding|missense_variant|MODERATE|311T>A|Leu104His
577	nsp1 (266-806)	T|C|protein_coding|synonymous_variant|LOW|312T>C|Leu104Leu
577	nsp1 (266-806)	T|A|protein_coding|synonymous_variant|LOW|312T>A|Leu104Leu
578	nsp1 (266-806)	G|A|protein_coding|missense_variant|MODERATE|313G>A|Gly105Ser
579	nsp1 (266-806)	G|T|protein_coding|missense_variant|MODERATE|314G>T|Gly105Val
580	nsp1 (266-806)	T|A|protein_coding|synonymous_variant|LOW|315T>A|Gly105Gly
581	nsp1 (266-806)	G|A|protein_coding|missense_variant|MODERATE|316G>A|Val106Ile
582	nsp1 (266-806)	T|C|protein_coding|missense_variant|MODERATE|317T>C|Val106Ala
582	nsp1 (266-806)	T|G|protein_coding|missense_variant|MODERATE|317T>G|Val106Gly
583	nsp1 (266-806)	C|T|protein_coding|synonymous_variant|LOW|318C>T|Val106Val
584	nsp1 (266-806)	C|T|protein_coding|missense_variant|MODERATE|319C>T|Leu107Phe
586	nsp1 (266-806)	T|C|protein_coding|synonymous_variant|LOW|321T>C|Leu107Leu
586	nsp1 (266-806)	T|A|protein_coding|synonymous_variant|LOW|321T>A|Leu107Leu
588	nsp1 (266-806)	T|C|protein_coding|missense_variant|MODERATE|323T>C|Val108Ala
589	nsp1 (266-806)	C|T|protein_coding|synonymous_variant|LOW|324C>T|Val108Val
589	nsp1 (266-806)	C|A|protein_coding|synonymous_variant|LOW|324C>A|Val108Val
590	nsp1 (266-806)	C|T|protein_coding|missense_variant|MODERATE|325C>T|Pro109Ser
591	nsp1 (266-806)	C|A|protein_coding|missense_variant|MODERATE|326C>A|Pro109His
592	nsp1 (266-806)	T|C|protein_coding|synonymous_variant|LOW|327T>C|Pro109Pro
593	nsp1 (266-806)	C|T|protein_coding|missense_variant|MODERATE|328C>T|His110Tyr
595	nsp1 (266-806)	T|C|protein_coding|synonymous_variant|LOW|330T>C|His110His
595	nsp1 (266-806)	T|A|protein_coding|missense_variant|MODERATE|330T>A|His110Gln
596	nsp1 (266-806)	G|T|protein_coding|missense_variant|MODERATE|331G>T|Val111Leu
598	nsp1 (266-806)	G|T|protein_coding|synonymous_variant|LOW|333G>T|Val111Val
598	nsp1 (266-806)	G|A|protein_coding|synonymous_variant|LOW|333G>A|Val111Val
599	nsp1 (266-806)	G|A|protein_coding|missense_variant|MODERATE|334G>A|Gly112Ser
599	nsp1 (266-806)	G|T|protein_coding|missense_variant|MODERATE|334G>T|Gly112Cys
600	nsp1 (266-806)	G|A|protein_coding|missense_variant|MODERATE|335G>A|Gly112Asp
600	nsp1 (266-806)	G|T|protein_coding|missense_variant|MODERATE|335G>T|Gly112Val
601	nsp1 (266-806)	C|T|protein_coding|synonymous_variant|LOW|336C>T|Gly112Gly
602	nsp1 (266-806)	G|A|protein_coding|missense_variant|MODERATE|337G>A|Glu113Lys
603	nsp1 (266-806)	A|C|protein_coding|missense_variant|MODERATE|338A>C|Glu113Ala
606	nsp1 (266-806)	T|C|protein_coding|missense_variant|MODERATE|341T>C|Ile114Thr
606	nsp1 (266-806)	T|G|protein_coding|missense_variant|MODERATE|341T>G|Ile114Arg
607	nsp1 (266-806)	A|G|protein_coding|missense_variant|MODERATE|342A>G|Ile114Met
608	nsp1 (266-806)	C|T|protein_coding|missense_variant|MODERATE|343C>T|Pro115Ser
609	nsp1 (266-806)	C|T|protein_coding|missense_variant|MODERATE|344C>T|Pro115Leu
610	nsp1 (266-806)	A|G|protein_coding|synonymous_variant|LOW|345A>G|Pro115Pro
610	nsp1 (266-806)	A|T|protein_coding|synonymous_variant|LOW|345A>T|Pro115Pro
611	nsp1 (266-806)	G|A|protein_coding|missense_variant|MODERATE|346G>A|Val116Met
611	nsp1 (266-806)	G|T|protein_coding|missense_variant|MODERATE|346G>T|Val116Leu
612	nsp1 (266-806)	T|C|protein_coding|missense_variant|MODERATE|347T>C|Val116Ala
613	nsp1 (266-806)	G|A|protein_coding|synonymous_variant|LOW|348G>A|Val116Val
614	nsp1 (266-806)	G|T|protein_coding|missense_variant|MODERATE|349G>T|Ala117Ser
614	nsp1 (266-806)	G|A|protein_coding|missense_variant|MODERATE|349G>A|Ala117Thr
615	nsp1 (266-806)	C|T|protein_coding|missense_variant|MODERATE|350C>T|Ala117Val
617	nsp1 (266-806)	T|C|protein_coding|missense_variant|MODERATE|352T>C|Tyr118His
618	nsp1 (266-806)	A|G|protein_coding|missense_variant|MODERATE|353A>G|Tyr118Cys
619	nsp1 (266-806)	C|T|protein_coding|synonymous_variant|LOW|354C>T|Tyr118Tyr
620	nsp1 (266-806)	C|T|protein_coding|missense_variant|MODERATE|355C>T|Arg119Cys
621	nsp1 (266-806)	G|A|protein_coding|missense_variant|MODERATE|356G>A|Arg119His
621	nsp1 (266-806)	G|T|protein_coding|missense_variant|MODERATE|356G>T|Arg119Leu
622	nsp1 (266-806)	C|T|protein_coding|synonymous_variant|LOW|357C>T|Arg119Arg
623	nsp1 (266-806)	A|G|protein_coding|missense_variant|MODERATE|358A>G|Lys120Glu
625	nsp1 (266-806)	G|T|protein_coding|missense_variant|MODERATE|360G>T|Lys120Asn
625	nsp1 (266-806)	G|A|protein_coding|synonymous_variant|LOW|360G>A|Lys120Lys
626	nsp1 (266-806)	G|T|protein_coding|missense_variant|MODERATE|361G>T|Val121Phe
626	nsp1 (266-806)	G|A|protein_coding|missense_variant|MODERATE|361G>A|Val121Ile
627	nsp1 (266-806)	T|A|protein_coding|missense_variant|MODERATE|362T>A|Val121Asp
629	nsp1 (266-806)	C|T|protein_coding|missense_variant|MODERATE|364C>T|Leu122Phe
629	nsp1 (266-806)	C|A|protein_coding|missense_variant|MODERATE|364C>A|Leu122Ile
630	nsp1 (266-806)	T|G|protein_coding|missense_variant|MODERATE|365T>G|Leu122Arg
631	nsp1 (266-806)	T|C|protein_coding|synonymous_variant|LOW|366T>C|Leu122Leu
632	nsp1 (266-806)	C|T|protein_coding|missense_variant|MODERATE|367C>T|Leu123Phe
634	nsp1 (266-806)	T|C|protein_coding|synonymous_variant|LOW|369T>C|Leu123Leu
635	nsp1 (266-806)	C|T|protein_coding|missense_variant|MODERATE|370C>T|Arg124Cys
640	nsp1 (266-806)	G|A|protein_coding|synonymous_variant|LOW|375G>A|Lys125Lys
642	nsp1 (266-806)	A|G|protein_coding|missense_variant|MODERATE|377A>G|Asn126Ser
643	nsp1 (266-806)	C|T|protein_coding|synonymous_variant|LOW|378C>T|Asn126Asn
645	nsp1 (266-806)	G|A|protein_coding|missense_variant|MODERATE|380G>A|Gly127Asp
646	nsp1 (266-806)	T|C|protein_coding|synonymous_variant|LOW|381T>C|Gly127Gly
647	nsp1 (266-806)	A|G|protein_coding|missense_variant|MODERATE|382A>G|Asn128Asp
652	nsp1 (266-806)	A|T|protein_coding|missense_variant|MODERATE|387A>T|Lys129Asn
652	nsp1 (266-806)	A|G|protein_coding|synonymous_variant|LOW|387A>G|Lys129Lys
654	nsp1 (266-806)	G|A|protein_coding|missense_variant|MODERATE|389G>A|Gly130Glu
655	nsp1 (266-806)	A|G|protein_coding|synonymous_variant|LOW|390A>G|Gly130Gly
656	nsp1 (266-806)	G|A|protein_coding|missense_variant|MODERATE|391G>A|Ala131Thr
656	nsp1 (266-806)	G|T|protein_coding|missense_variant|MODERATE|391G>T|Ala131Ser
657	nsp1 (266-806)	C|T|protein_coding|missense_variant|MODERATE|392C>T|Ala131Val
658	nsp1 (266-806)	T|C|protein_coding|synonymous_variant|LOW|393T>C|Ala131Ala
659	nsp1 (266-806)	G|A|protein_coding|missense_variant|MODERATE|394G>A|Gly132Ser
660	nsp1 (266-806)	G|A|protein_coding|missense_variant|MODERATE|395G>A|Gly132Asp
661	nsp1 (266-806)	T|C|protein_coding|synonymous_variant|LOW|396T>C|Gly132Gly
662	nsp1 (266-806)	G|T|protein_coding|missense_variant|MODERATE|397G>T|Gly133Cys
662	nsp1 (266-806)	G|A|protein_coding|missense_variant|MODERATE|397G>A|Gly133Ser
663	nsp1 (266-806)	G|A|protein_coding|missense_variant|MODERATE|398G>A|Gly133Asp
664	nsp1 (266-806)	C|T|protein_coding|synonymous_variant|LOW|399C>T|Gly133Gly
667	nsp1 (266-806)	T|C|protein_coding|synonymous_variant|LOW|402T>C|His134His
670	nsp1 (266-806)	T|C|protein_coding|synonymous_variant|LOW|405T>C|Ser135Ser
672	nsp1 (266-806)	A|G|protein_coding|missense_variant|MODERATE|407A>G|Tyr136Cys
673	nsp1 (266-806)	C|T|protein_coding|synonymous_variant|LOW|408C>T|Tyr136Tyr
674	nsp1 (266-806)	G|A|protein_coding|missense_variant|MODERATE|409G>A|Gly137Ser
674	nsp1 (266-806)	G|T|protein_coding|missense_variant|MODERATE|409G>T|Gly137Cys
675	nsp1 (266-806)	G|T|protein_coding|missense_variant|MODERATE|410G>T|Gly137Val
675	nsp1 (266-806)	G|A|protein_coding|missense_variant|MODERATE|410G>A|Gly137Asp
675	nsp1 (266-806)	G|C|protein_coding|missense_variant|MODERATE|410G>C|Gly137Ala
676	nsp1 (266-806)	C|T|protein_coding|synonymous_variant|LOW|411C>T|Gly137Gly
677	nsp1 (266-806)	G|A|protein_coding|missense_variant|MODERATE|412G>A|Ala138Thr
677	nsp1 (266-806)	G|T|protein_coding|missense_variant|MODERATE|412G>T|Ala138Ser
678	nsp1 (266-806)	C|T|protein_coding|missense_variant|MODERATE|413C>T|Ala138Val
680	nsp1 (266-806)	G|A|protein_coding|missense_variant|MODERATE|415G>A|Asp139Asn
680	nsp1 (266-806)	G|T|protein_coding|missense_variant|MODERATE|415G>T|Asp139Tyr
681	nsp1 (266-806)	A|G|protein_coding|missense_variant|MODERATE|416A>G|Asp139Gly
682	nsp1 (266-806)	T|C|protein_coding|synonymous_variant|LOW|417T>C|Asp139Asp
683	nsp1 (266-806)	C|T|protein_coding|synonymous_variant|LOW|418C>T|Leu140Leu
686	nsp1 (266-806)	A|G|protein_coding|missense_variant|MODERATE|421A>G|Lys141Glu
687	nsp1 (266-806)	A|G|protein_coding|missense_variant|MODERATE|422A>G|Lys141Arg
689	nsp1 (266-806)	T|C|protein_coding|missense_variant|MODERATE|424T>C|Ser142Pro
689	nsp1 (266-806)	T|G|protein_coding|missense_variant|MODERATE|424T>G|Ser142Ala
690	nsp1 (266-806)	C|T|protein_coding|missense_variant|MODERATE|425C>T|Ser142Leu
691	nsp1 (266-806)	A|G|protein_coding|synonymous_variant|LOW|426A>G|Ser142Ser
691	nsp1 (266-806)	A|C|protein_coding|synonymous_variant|LOW|426A>C|Ser142Ser
691	nsp1 (266-806)	A|T|protein_coding|synonymous_variant|LOW|426A>T|Ser142Ser
692	nsp1 (266-806)	T|A|protein_coding|missense_variant|MODERATE|427T>A|Phe143Ile
693	nsp1 (266-806)	T|G|protein_coding|missense_variant|MODERATE|428T>G|Phe143Cys
693	nsp1 (266-806)	T|C|protein_coding|missense_variant|MODERATE|428T>C|Phe143Ser
693	nsp1 (266-806)	T|A|protein_coding|missense_variant|MODERATE|428T>A|Phe143Tyr
694	nsp1 (266-806)	T|C|protein_coding|synonymous_variant|LOW|429T>C|Phe143Phe
694	nsp1 (266-806)	T|A|protein_coding|missense_variant|MODERATE|429T>A|Phe143Leu
696	nsp1 (266-806)	A|C|protein_coding|missense_variant|MODERATE|431A>C|Asp144Ala
697	nsp1 (266-806)	C|T|protein_coding|synonymous_variant|LOW|432C>T|Asp144Asp
700	nsp1 (266-806)	A|G|protein_coding|synonymous_variant|LOW|435A>G|Leu145Leu
700	nsp1 (266-806)	A|T|protein_coding|missense_variant|MODERATE|435A>T|Leu145Phe
701	nsp1 (266-806)	G|T|protein_coding|missense_variant|MODERATE|436G>T|Gly146Cys
701	nsp1 (266-806)	G|A|protein_coding|missense_variant|MODERATE|436G>A|Gly146Ser
702	nsp1 (266-806)	G|A|protein_coding|missense_variant|MODERATE|437G>A|Gly146Asp
703	nsp1 (266-806)	C|T|protein_coding|synonymous_variant|LOW|438C>T|Gly146Gly
703	nsp1 (266-806)	C|A|protein_coding|synonymous_variant|LOW|438C>A|Gly146Gly
704	nsp1 (266-806)	G|A|protein_coding|missense_variant|MODERATE|439G>A|Asp147Asn
705	nsp1 (266-806)	A|T|protein_coding|missense_variant|MODERATE|440A>T|Asp147Val
706	nsp1 (266-806)	C|T|protein_coding|synonymous_variant|LOW|441C>T|Asp147Asp
706	nsp1 (266-806)	C|A|protein_coding|missense_variant|MODERATE|441C>A|Asp147Glu
709	nsp1 (266-806)	G|T|protein_coding|missense_variant|MODERATE|444G>T|Glu148Asp
709	nsp1 (266-806)	G|A|protein_coding|synonymous_variant|LOW|444G>A|Glu148Glu
711	nsp1 (266-806)	T|A|protein_coding|missense_variant|MODERATE|446T>A|Leu149His
711	nsp1 (266-806)	T|G|protein_coding|missense_variant|MODERATE|446T>G|Leu149Arg
712	nsp1 (266-806)	T|A|protein_coding|synonymous_variant|LOW|447T>A|Leu149Leu
713	nsp1 (266-806)	G|T|protein_coding|missense_variant|MODERATE|448G>T|Gly150Cys
714	nsp1 (266-806)	G|A|protein_coding|missense_variant|MODERATE|449G>A|Gly150Asp
714	nsp1 (266-806)	G|C|protein_coding|missense_variant|MODERATE|449G>C|Gly150Ala
715	nsp1 (266-806)	C|T|protein_coding|synonymous_variant|LOW|450C>T|Gly150Gly
717	nsp1 (266-806)	C|G|protein_coding|missense_variant|MODERATE|452C>G|Thr151Ser
718	nsp1 (266-806)	T|C|protein_coding|synonymous_variant|LOW|453T>C|Thr151Thr
718	nsp1 (266-806)	T|A|protein_coding|synonymous_variant|LOW|453T>A|Thr151Thr
720	nsp1 (266-806)	A|G|protein_coding|missense_variant|MODERATE|455A>G|Asp152Gly
720	nsp1 (266-806)	A|C|protein_coding|missense_variant|MODERATE|455A>C|Asp152Ala
720	nsp1 (266-806)	A|T|protein_coding|missense_variant|MODERATE|455A>T|Asp152Val
721	nsp1 (266-806)	T|C|protein_coding|synonymous_variant|LOW|456T>C|Asp152Asp
723	nsp1 (266-806)	C|T|protein_coding|missense_variant|MODERATE|458C>T|Pro153Leu
731	nsp1 (266-806)	G|C|protein_coding|missense_variant|MODERATE|466G>C|Asp156His
734	nsp1 (266-806)	T|C|protein_coding|missense_variant|MODERATE|469T>C|Phe157Leu
736	nsp1 (266-806)	T|C|protein_coding|synonymous_variant|LOW|471T>C|Phe157Phe
739	nsp1 (266-806)	A|G|protein_coding|synonymous_variant|LOW|474A>G|Gln158Gln
740	nsp1 (266-806)	G|A|protein_coding|missense_variant|MODERATE|475G>A|Glu159Lys
741	nsp1 (266-806)	A|G|protein_coding|missense_variant|MODERATE|476A>G|Glu159Gly
742	nsp1 (266-806)	A|G|protein_coding|synonymous_variant|LOW|477A>G|Glu159Glu
745	nsp1 (266-806)	C|T|protein_coding|synonymous_variant|LOW|480C>T|Asn160Asn
747	nsp1 (266-806)	G|T|protein_coding|missense_variant|MODERATE|482G>T|Trp161Leu
748	nsp1 (266-806)	G|T|protein_coding|missense_variant|MODERATE|483G>T|Trp161Cys
749	nsp1 (266-806)	A|T|protein_coding|missense_variant|MODERATE|484A>T|Asn162Tyr
751	nsp1 (266-806)	C|T|protein_coding|synonymous_variant|LOW|486C>T|Asn162Asn
753	nsp1 (266-806)	C|T|protein_coding|missense_variant|MODERATE|488C>T|Thr163Ile
758	nsp1 (266-806)	C|T|protein_coding|missense_variant|MODERATE|493C>T|His165Tyr
759	nsp1 (266-806)	A|T|protein_coding|missense_variant|MODERATE|494A>T|His165Leu
761	nsp1 (266-806)	A|G|protein_coding|missense_variant|MODERATE|496A>G|Ser166Gly
765	nsp1 (266-806)	G|C|protein_coding|missense_variant|MODERATE|500G>C|Ser167Thr
766	nsp1 (266-806)	T|C|protein_coding|synonymous_variant|LOW|501T>C|Ser167Ser
768	nsp1 (266-806)	G|T|protein_coding|missense_variant|MODERATE|503G>T|Gly168Val
769	nsp1 (266-806)	T|C|protein_coding|synonymous_variant|LOW|504T>C|Gly168Gly
771	nsp1 (266-806)	T|C|protein_coding|missense_variant|MODERATE|506T>C|Val169Ala
772	nsp1 (266-806)	T|C|protein_coding|synonymous_variant|LOW|507T>C|Val169Val
773	nsp1 (266-806)	A|G|protein_coding|missense_variant|MODERATE|508A>G|Thr170Ala
774	nsp1 (266-806)	C|T|protein_coding|missense_variant|MODERATE|509C>T|Thr170Ile
775	nsp1 (266-806)	C|T|protein_coding|synonymous_variant|LOW|510C>T|Thr170Thr
777	nsp1 (266-806)	G|A|protein_coding|missense_variant|MODERATE|512G>A|Arg171His
778	nsp1 (266-806)	T|C|protein_coding|synonymous_variant|LOW|513T>C|Arg171Arg
779	nsp1 (266-806)	G|C|protein_coding|missense_variant|MODERATE|514G>C|Glu172Gln
779	nsp1 (266-806)	G|A|protein_coding|missense_variant|MODERATE|514G>A|Glu172Lys
784	nsp1 (266-806)	C|T|protein_coding|synonymous_variant|LOW|519C>T|Leu173Leu
787	nsp1 (266-806)	G|T|protein_coding|missense_variant|MODERATE|522G>T|Met174Ile
788	nsp1 (266-806)	C|G|protein_coding|missense_variant|MODERATE|523C>G|Arg175Gly
788	nsp1 (266-806)	C|T|protein_coding|missense_variant|MODERATE|523C>T|Arg175Cys
789	nsp1 (266-806)	G|A|protein_coding|missense_variant|MODERATE|524G>A|Arg175His
792	nsp1 (266-806)	A|G|protein_coding|missense_variant|MODERATE|527A>G|Glu176Gly
796	nsp1 (266-806)	T|C|protein_coding|synonymous_variant|LOW|531T>C|Leu177Leu
798	nsp1 (266-806)	A|G|protein_coding|missense_variant|MODERATE|533A>G|Asn178Ser
799	nsp1 (266-806)	C|T|protein_coding|synonymous_variant|LOW|534C>T|Asn178Asn
800	nsp1 (266-806)	G|T|protein_coding|stop_gained|HIGH|535G>T|Gly179*
802	nsp1 (266-806)	A|G|protein_coding|synonymous_variant|LOW|537A>G|Gly179Gly
805	nsp1 (266-806)	G|A|protein_coding|synonymous_variant|LOW|540G>A|Gly180Gly
806	nsp1 (266-806)	G|A|protein_coding|missense_variant|MODERATE|541G>A|Ala181Thr
808	nsp2 (807-2720)	A|G|protein_coding|synonymous_variant|LOW|543A>G|Ala181Ala
808	nsp2 (807-2720)	A|T|protein_coding|synonymous_variant|LOW|543A>T|Ala181Ala
809	nsp2 (807-2720)	T|A|protein_coding|missense_variant|MODERATE|544T>A|Tyr182Asn
809	nsp2 (807-2720)	T|C|protein_coding|missense_variant|MODERATE|544T>C|Tyr182His
810	nsp2 (807-2720)	A|G|protein_coding|missense_variant|MODERATE|545A>G|Tyr182Cys
811	nsp2 (807-2720)	C|T|protein_coding|synonymous_variant|LOW|546C>T|Tyr182Tyr
813	nsp2 (807-2720)	C|A|protein_coding|missense_variant|MODERATE|548C>A|Thr183Asn
813	nsp2 (807-2720)	C|T|protein_coding|missense_variant|MODERATE|548C>T|Thr183Ile
814	nsp2 (807-2720)	T|C|protein_coding|synonymous_variant|LOW|549T>C|Thr183Thr
815	nsp2 (807-2720)	C|T|protein_coding|missense_variant|MODERATE|550C>T|Arg184Cys
816	nsp2 (807-2720)	G|A|protein_coding|missense_variant|MODERATE|551G>A|Arg184His
817	nsp2 (807-2720)	C|T|protein_coding|synonymous_variant|LOW|552C>T|Arg184Arg
818	nsp2 (807-2720)	T|C|protein_coding|missense_variant|MODERATE|553T>C|Tyr185His
823	nsp2 (807-2720)	C|T|protein_coding|synonymous_variant|LOW|558C>T|Val186Val
824	nsp2 (807-2720)	G|T|protein_coding|missense_variant|MODERATE|559G>T|Asp187Tyr
826	nsp2 (807-2720)	T|C|protein_coding|synonymous_variant|LOW|561T>C|Asp187Asp
828	nsp2 (807-2720)	A|G|protein_coding|missense_variant|MODERATE|563A>G|Asn188Ser
829	nsp2 (807-2720)	C|T|protein_coding|synonymous_variant|LOW|564C>T|Asn188Asn
832	nsp2 (807-2720)	C|T|protein_coding|synonymous_variant|LOW|567C>T|Asn189Asn
833	nsp2 (807-2720)	T|C|protein_coding|missense_variant|MODERATE|568T>C|Phe190Leu
834	nsp2 (807-2720)	T|G|protein_coding|missense_variant|MODERATE|569T>G|Phe190Cys
835	nsp2 (807-2720)	C|T|protein_coding|synonymous_variant|LOW|570C>T|Phe190Phe
837	nsp2 (807-2720)	G|T|protein_coding|missense_variant|MODERATE|572G>T|Cys191Phe
838	nsp2 (807-2720)	T|C|protein_coding|synonymous_variant|LOW|573T>C|Cys191Cys
839	nsp2 (807-2720)	G|A|protein_coding|missense_variant|MODERATE|574G>A|Gly192Ser
840	nsp2 (807-2720)	G|A|protein_coding|missense_variant|MODERATE|575G>A|Gly192Asp
841	nsp2 (807-2720)	C|T|protein_coding|synonymous_variant|LOW|576C>T|Gly192Gly
842	nsp2 (807-2720)	C|T|protein_coding|missense_variant|MODERATE|577C>T|Pro193Ser
843	nsp2 (807-2720)	C|T|protein_coding|missense_variant|MODERATE|578C>T|Pro193Leu
844	nsp2 (807-2720)	T|G|protein_coding|synonymous_variant|LOW|579T>G|Pro193Pro
844	nsp2 (807-2720)	T|C|protein_coding|synonymous_variant|LOW|579T>C|Pro193Pro
844	nsp2 (807-2720)	T|A|protein_coding|synonymous_variant|LOW|579T>A|Pro193Pro
845	nsp2 (807-2720)	G|T|protein_coding|missense_variant|MODERATE|580G>T|Asp194Tyr
847	nsp2 (807-2720)	T|G|protein_coding|missense_variant|MODERATE|582T>G|Asp194Glu
848	nsp2 (807-2720)	G|T|protein_coding|missense_variant|MODERATE|583G>T|Gly195Cys
850	nsp2 (807-2720)	C|T|protein_coding|synonymous_variant|LOW|585C>T|Gly195Gly
851	nsp2 (807-2720)	T|A|protein_coding|missense_variant|MODERATE|586T>A|Tyr196Asn
851	nsp2 (807-2720)	T|C|protein_coding|missense_variant|MODERATE|586T>C|Tyr196His
854	nsp2 (807-2720)	C|T|protein_coding|missense_variant|MODERATE|589C>T|Pro197Ser
855	nsp2 (807-2720)	C|T|protein_coding|missense_variant|MODERATE|590C>T|Pro197Leu
856	nsp2 (807-2720)	T|C|protein_coding|synonymous_variant|LOW|591T>C|Pro197Pro
856	nsp2 (807-2720)	T|A|protein_coding|synonymous_variant|LOW|591T>A|Pro197Pro
857	nsp2 (807-2720)	C|T|protein_coding|missense_variant|MODERATE|592C>T|Leu198Phe
860	nsp2 (807-2720)	G|A|protein_coding|missense_variant|MODERATE|595G>A|Glu199Lys
861	nsp2 (807-2720)	A|T|protein_coding|missense_variant|MODERATE|596A>T|Glu199Val
861	nsp2 (807-2720)	A|C|protein_coding|missense_variant|MODERATE|596A>C|Glu199Ala
861	nsp2 (807-2720)	A|G|protein_coding|missense_variant|MODERATE|596A>G|Glu199Gly
862	nsp2 (807-2720)	G|T|protein_coding|missense_variant|MODERATE|597G>T|Glu199Asp
865	nsp2 (807-2720)	C|T|protein_coding|synonymous_variant|LOW|600C>T|Cys200Cys
867	nsp2 (807-2720)	T|C|protein_coding|missense_variant|MODERATE|602T>C|Ile201Thr
871	nsp2 (807-2720)	A|G|protein_coding|synonymous_variant|LOW|606A>G|Lys202Lys
872	nsp2 (807-2720)	G|T|protein_coding|missense_variant|MODERATE|607G>T|Asp203Tyr
872	nsp2 (807-2720)	G|C|protein_coding|missense_variant|MODERATE|607G>C|Asp203His
872	nsp2 (807-2720)	G|A|protein_coding|missense_variant|MODERATE|607G>A|Asp203Asn
873	nsp2 (807-2720)	A|G|protein_coding|missense_variant|MODERATE|608A>G|Asp203Gly
874	nsp2 (807-2720)	C|T|protein_coding|synonymous_variant|LOW|609C>T|Asp203Asp
874	nsp2 (807-2720)	C|A|protein_coding|missense_variant|MODERATE|609C>A|Asp203Glu
875	nsp2 (807-2720)	C|T|protein_coding|missense_variant|MODERATE|610C>T|Leu204Phe
875	nsp2 (807-2720)	C|A|protein_coding|missense_variant|MODERATE|610C>A|Leu204Ile
878	nsp2 (807-2720)	C|T|protein_coding|synonymous_variant|LOW|613C>T|Leu205Leu
878	nsp2 (807-2720)	C|A|protein_coding|missense_variant|MODERATE|613C>A|Leu205Ile
881	nsp2 (807-2720)	G|A|protein_coding|missense_variant|MODERATE|616G>A|Ala206Thr
881	nsp2 (807-2720)	G|T|protein_coding|missense_variant|MODERATE|616G>T|Ala206Ser
882	nsp2 (807-2720)	C|A|protein_coding|missense_variant|MODERATE|617C>A|Ala206Glu
882	nsp2 (807-2720)	C|T|protein_coding|missense_variant|MODERATE|617C>T|Ala206Val
883	nsp2 (807-2720)	A|C|protein_coding|synonymous_variant|LOW|618A>C|Ala206Ala
884	nsp2 (807-2720)	C|T|protein_coding|missense_variant|MODERATE|619C>T|Arg207Cys
884	nsp2 (807-2720)	C|G|protein_coding|missense_variant|MODERATE|619C>G|Arg207Gly
884	nsp2 (807-2720)	C|A|protein_coding|missense_variant|MODERATE|619C>A|Arg207Ser
885	nsp2 (807-2720)	G|T|protein_coding|missense_variant|MODERATE|620G>T|Arg207Leu
885	nsp2 (807-2720)	G|A|protein_coding|missense_variant|MODERATE|620G>A|Arg207His
886	nsp2 (807-2720)	T|C|protein_coding|synonymous_variant|LOW|621T>C|Arg207Arg
889	nsp2 (807-2720)	T|C|protein_coding|synonymous_variant|LOW|624T>C|Ala208Ala
892	nsp2 (807-2720)	T|C|protein_coding|synonymous_variant|LOW|627T>C|Gly209Gly
895	nsp2 (807-2720)	A|G|protein_coding|synonymous_variant|LOW|630A>G|Lys210Lys
897	nsp2 (807-2720)	C|T|protein_coding|missense_variant|MODERATE|632C>T|Ala211Val
898	nsp2 (807-2720)	T|C|protein_coding|synonymous_variant|LOW|633T>C|Ala211Ala
900	nsp2 (807-2720)	C|T|protein_coding|missense_variant|MODERATE|635C>T|Ser212Leu
901	nsp2 (807-2720)	A|T|protein_coding|synonymous_variant|LOW|636A>T|Ser212Ser
901	nsp2 (807-2720)	A|G|protein_coding|synonymous_variant|LOW|636A>G|Ser212Ser
903	nsp2 (807-2720)	G|T|protein_coding|missense_variant|MODERATE|638G>T|Cys213Phe
903	nsp2 (807-2720)	G|A|protein_coding|missense_variant|MODERATE|638G>A|Cys213Tyr
904	nsp2 (807-2720)	C|T|protein_coding|synonymous_variant|LOW|639C>T|Cys213Cys
905	nsp2 (807-2720)	A|G|protein_coding|missense_variant|MODERATE|640A>G|Thr214Ala
906	nsp2 (807-2720)	C|T|protein_coding|missense_variant|MODERATE|641C>T|Thr214Ile
907	nsp2 (807-2720)	T|G|protein_coding|synonymous_variant|LOW|642T>G|Thr214Thr
910	nsp2 (807-2720)	G|T|protein_coding|missense_variant|MODERATE|645G>T|Leu215Phe
910	nsp2 (807-2720)	G|A|protein_coding|synonymous_variant|LOW|645G>A|Leu215Leu
911	nsp2 (807-2720)	T|C|protein_coding|missense_variant|MODERATE|646T>C|Ser216Pro
912	nsp2 (807-2720)	C|T|protein_coding|missense_variant|MODERATE|647C>T|Ser216Phe
913	nsp2 (807-2720)	C|T|protein_coding|synonymous_variant|LOW|648C>T|Ser216Ser
914	nsp2 (807-2720)	G|A|protein_coding|missense_variant|MODERATE|649G>A|Glu217Lys
914	nsp2 (807-2720)	G|C|protein_coding|missense_variant|MODERATE|649G>C|Glu217Gln
915	nsp2 (807-2720)	A|G|protein_coding|missense_variant|MODERATE|650A>G|Glu217Gly
916	nsp2 (807-2720)	A|G|protein_coding|synonymous_variant|LOW|651A>G|Glu217Glu
920	nsp2 (807-2720)	C|T|protein_coding|synonymous_variant|LOW|655C>T|Leu219Leu
920	nsp2 (807-2720)	C|A|protein_coding|missense_variant|MODERATE|655C>A|Leu219Met
921	nsp2 (807-2720)	T|A|protein_coding|missense_variant|MODERATE|656T>A|Leu219Gln
922	nsp2 (807-2720)	G|A|protein_coding|synonymous_variant|LOW|657G>A|Leu219Leu
922	nsp2 (807-2720)	G|T|protein_coding|synonymous_variant|LOW|657G>T|Leu219Leu
923	nsp2 (807-2720)	G|T|protein_coding|missense_variant|MODERATE|658G>T|Asp220Tyr
925	nsp2 (807-2720)	C|T|protein_coding|synonymous_variant|LOW|660C>T|Asp220Asp
926	nsp2 (807-2720)	T|G|protein_coding|missense_variant|MODERATE|661T>G|Phe221Val
927	nsp2 (807-2720)	T|A|protein_coding|missense_variant|MODERATE|662T>A|Phe221Tyr
929	nsp2 (807-2720)	A|G|protein_coding|missense_variant|MODERATE|664A>G|Ile222Val
931	nsp2 (807-2720)	T|C|protein_coding|synonymous_variant|LOW|666T>C|Ile222Ile
932	nsp2 (807-2720)	G|T|protein_coding|missense_variant|MODERATE|667G>T|Asp223Tyr
932	nsp2 (807-2720)	G|C|protein_coding|missense_variant|MODERATE|667G>C|Asp223His
932	nsp2 (807-2720)	G|A|protein_coding|missense_variant|MODERATE|667G>A|Asp223Asn
934	nsp2 (807-2720)	C|T|protein_coding|synonymous_variant|LOW|669C>T|Asp223Asp
934	nsp2 (807-2720)	C|A|protein_coding|missense_variant|MODERATE|669C>A|Asp223Glu
936	nsp2 (807-2720)	C|T|protein_coding|missense_variant|MODERATE|671C>T|Thr224Ile
936	nsp2 (807-2720)	C|A|protein_coding|missense_variant|MODERATE|671C>A|Thr224Asn
937	nsp2 (807-2720)	T|C|protein_coding|synonymous_variant|LOW|672T>C|Thr224Thr
939	nsp2 (807-2720)	A|G|protein_coding|missense_variant|MODERATE|674A>G|Lys225Arg
940	nsp2 (807-2720)	G|A|protein_coding|synonymous_variant|LOW|675G>A|Lys225Lys
941	nsp2 (807-2720)	A|G|protein_coding|missense_variant|MODERATE|676A>G|Arg226Gly
942	nsp2 (807-2720)	G|A|protein_coding|missense_variant|MODERATE|677G>A|Arg226Lys
943	nsp2 (807-2720)	G|A|protein_coding|synonymous_variant|LOW|678G>A|Arg226Arg
944	nsp2 (807-2720)	G|A|protein_coding|missense_variant|MODERATE|679G>A|Gly227Ser
945	nsp2 (807-2720)	G|T|protein_coding|missense_variant|MODERATE|680G>T|Gly227Val
946	nsp2 (807-2720)	T|A|protein_coding|synonymous_variant|LOW|681T>A|Gly227Gly
946	nsp2 (807-2720)	T|C|protein_coding|synonymous_variant|LOW|681T>C|Gly227Gly
949	nsp2 (807-2720)	A|G|protein_coding|synonymous_variant|LOW|684A>G|Val228Val
950	nsp2 (807-2720)	T|C|protein_coding|missense_variant|MODERATE|685T>C|Tyr229His
951	nsp2 (807-2720)	A|G|protein_coding|missense_variant|MODERATE|686A>G|Tyr229Cys
952	nsp2 (807-2720)	C|T|protein_coding|synonymous_variant|LOW|687C>T|Tyr229Tyr
953	nsp2 (807-2720)	T|C|protein_coding|missense_variant|MODERATE|688T>C|Cys230Arg
955	nsp2 (807-2720)	C|T|protein_coding|synonymous_variant|LOW|690C>T|Cys230Cys
956	nsp2 (807-2720)	T|A|protein_coding|missense_variant|MODERATE|691T>A|Cys231Ser
957	nsp2 (807-2720)	G|A|protein_coding|missense_variant|MODERATE|692G>A|Cys231Tyr
958	nsp2 (807-2720)	C|T|protein_coding|synonymous_variant|LOW|693C>T|Cys231Cys
959	nsp2 (807-2720)	C|T|protein_coding|missense_variant|MODERATE|694C>T|Arg232Cys
959	nsp2 (807-2720)	C|A|protein_coding|missense_variant|MODERATE|694C>A|Arg232Ser
960	nsp2 (807-2720)	G|A|protein_coding|missense_variant|MODERATE|695G>A|Arg232His
960	nsp2 (807-2720)	G|T|protein_coding|missense_variant|MODERATE|695G>T|Arg232Leu
963	nsp2 (807-2720)	A|G|protein_coding|missense_variant|MODERATE|698A>G|Glu233Gly
963	nsp2 (807-2720)	A|T|protein_coding|missense_variant|MODERATE|698A>T|Glu233Val
964	nsp2 (807-2720)	A|G|protein_coding|synonymous_variant|LOW|699A>G|Glu233Glu
965	nsp2 (807-2720)	C|T|protein_coding|missense_variant|MODERATE|700C>T|His234Tyr
967	nsp2 (807-2720)	T|C|protein_coding|synonymous_variant|LOW|702T>C|His234His
968	nsp2 (807-2720)	G|A|protein_coding|missense_variant|MODERATE|703G>A|Glu235Lys
969	nsp2 (807-2720)	A|G|protein_coding|missense_variant|MODERATE|704A>G|Glu235Gly
970	nsp2 (807-2720)	G|A|protein_coding|synonymous_variant|LOW|705G>A|Glu235Glu
970	nsp2 (807-2720)	G|T|protein_coding|missense_variant|MODERATE|705G>T|Glu235Asp
973	nsp2 (807-2720)	T|C|protein_coding|synonymous_variant|LOW|708T>C|His236His
975	nsp2 (807-2720)	A|C|protein_coding|missense_variant|MODERATE|710A>C|Glu237Ala
976	nsp2 (807-2720)	A|G|protein_coding|synonymous_variant|LOW|711A>G|Glu237Glu
978	nsp2 (807-2720)	T|C|protein_coding|missense_variant|MODERATE|713T>C|Ile238Thr
979	nsp2 (807-2720)	T|C|protein_coding|synonymous_variant|LOW|714T>C|Ile238Ile
980	nsp2 (807-2720)	G|T|protein_coding|missense_variant|MODERATE|715G>T|Ala239Ser
981	nsp2 (807-2720)	C|T|protein_coding|missense_variant|MODERATE|716C>T|Ala239Val
983	nsp2 (807-2720)	T|G|protein_coding|missense_variant|MODERATE|718T>G|Trp240Gly
986	nsp2 (807-2720)	T|C|protein_coding|missense_variant|MODERATE|721T>C|Tyr241His
987	nsp2 (807-2720)	A|G|protein_coding|missense_variant|MODERATE|722A>G|Tyr241Cys
988	nsp2 (807-2720)	C|T|protein_coding|synonymous_variant|LOW|723C>T|Tyr241Tyr
990	nsp2 (807-2720)	C|T|protein_coding|missense_variant|MODERATE|725C>T|Thr242Met
991	nsp2 (807-2720)	G|A|protein_coding|synonymous_variant|LOW|726G>A|Thr242Thr
991	nsp2 (807-2720)	G|T|protein_coding|synonymous_variant|LOW|726G>T|Thr242Thr
994	nsp2 (807-2720)	A|G|protein_coding|synonymous_variant|LOW|729A>G|Glu243Glu
995	nsp2 (807-2720)	C|T|protein_coding|missense_variant|MODERATE|730C>T|Arg244Cys
998	nsp2 (807-2720)	T|G|protein_coding|missense_variant|MODERATE|733T>G|Ser245Ala
999	nsp2 (807-2720)	C|T|protein_coding|missense_variant|MODERATE|734C>T|Ser245Phe
1000	nsp2 (807-2720)	T|A|protein_coding|synonymous_variant|LOW|735T>A|Ser245Ser
1001	nsp2 (807-2720)	G|A|protein_coding|missense_variant|MODERATE|736G>A|Glu246Lys
1002	nsp2 (807-2720)	A|G|protein_coding|missense_variant|MODERATE|737A>G|Glu246Gly
1005	nsp2 (807-2720)	A|G|protein_coding|missense_variant|MODERATE|740A>G|Lys247Arg
1007	nsp2 (807-2720)	A|C|protein_coding|missense_variant|MODERATE|742A>C|Ser248Arg
1009	nsp2 (807-2720)	C|T|protein_coding|synonymous_variant|LOW|744C>T|Ser248Ser
1014	nsp2 (807-2720)	A|G|protein_coding|missense_variant|MODERATE|749A>G|Glu250Gly
1015	nsp2 (807-2720)	A|G|protein_coding|synonymous_variant|LOW|750A>G|Glu250Glu
1017	nsp2 (807-2720)	T|C|protein_coding|missense_variant|MODERATE|752T>C|Leu251Ser
1018	nsp2 (807-2720)	G|A|protein_coding|synonymous_variant|LOW|753G>A|Leu251Leu
1021	nsp2 (807-2720)	G|A|protein_coding|synonymous_variant|LOW|756G>A|Gln252Gln
1022	nsp2 (807-2720)	A|G|protein_coding|missense_variant|MODERATE|757A>G|Thr253Ala
1023	nsp2 (807-2720)	C|T|protein_coding|missense_variant|MODERATE|758C>T|Thr253Ile
1025	nsp2 (807-2720)	C|T|protein_coding|missense_variant|MODERATE|760C>T|Pro254Ser
1027	nsp2 (807-2720)	T|C|protein_coding|synonymous_variant|LOW|762T>C|Pro254Pro
1028	nsp2 (807-2720)	T|C|protein_coding|missense_variant|MODERATE|763T>C|Phe255Leu
1030	nsp2 (807-2720)	T|C|protein_coding|synonymous_variant|LOW|765T>C|Phe255Phe
1034	nsp2 (807-2720)	A|G|protein_coding|missense_variant|MODERATE|769A>G|Ile257Val
1036	nsp2 (807-2720)	T|C|protein_coding|synonymous_variant|LOW|771T>C|Ile257Ile
1042	nsp2 (807-2720)	G|A|protein_coding|synonymous_variant|LOW|777G>A|Leu259Leu
1043	nsp2 (807-2720)	G|T|protein_coding|missense_variant|MODERATE|778G>T|Ala260Ser
1043	nsp2 (807-2720)	G|A|protein_coding|missense_variant|MODERATE|778G>A|Ala260Thr
1044	nsp2 (807-2720)	C|T|protein_coding|missense_variant|MODERATE|779C>T|Ala260Val
1045	nsp2 (807-2720)	A|G|protein_coding|synonymous_variant|LOW|780A>G|Ala260Ala
1048	nsp2 (807-2720)	G|A|protein_coding|synonymous_variant|LOW|783G>A|Lys261Lys
1056	nsp2 (807-2720)	A|C|protein_coding|missense_variant|MODERATE|791A>C|Asp264Ala
1057	nsp2 (807-2720)	C|T|protein_coding|synonymous_variant|LOW|792C>T|Asp264Asp
1059	nsp2 (807-2720)	C|T|protein_coding|missense_variant|MODERATE|794C>T|Thr265Ile
1059	nsp2 (807-2720)	C|A|protein_coding|missense_variant|MODERATE|794C>A|Thr265Asn
1060	nsp2 (807-2720)	C|A|protein_coding|synonymous_variant|LOW|795C>A|Thr265Thr
1060	nsp2 (807-2720)	C|T|protein_coding|synonymous_variant|LOW|795C>T|Thr265Thr
1063	nsp2 (807-2720)	C|T|protein_coding|synonymous_variant|LOW|798C>T|Phe266Phe
1066	nsp2 (807-2720)	T|C|protein_coding|synonymous_variant|LOW|801T>C|Asn267Asn
1067	nsp2 (807-2720)	G|A|protein_coding|missense_variant|MODERATE|802G>A|Gly268Arg
1068	nsp2 (807-2720)	G|A|protein_coding|missense_variant|MODERATE|803G>A|Gly268Glu
1068	nsp2 (807-2720)	G|T|protein_coding|missense_variant|MODERATE|803G>T|Gly268Val
1069	nsp2 (807-2720)	G|A|protein_coding|synonymous_variant|LOW|804G>A|Gly268Gly
1069	nsp2 (807-2720)	G|T|protein_coding|synonymous_variant|LOW|804G>T|Gly268Gly
1072	nsp2 (807-2720)	A|G|protein_coding|synonymous_variant|LOW|807A>G|Glu269Glu
1072	nsp2 (807-2720)	A|C|protein_coding|missense_variant|MODERATE|807A>C|Glu269Asp
1074	nsp2 (807-2720)	G|T|protein_coding|missense_variant|MODERATE|809G>T|Cys270Phe
1076	nsp2 (807-2720)	C|T|protein_coding|missense_variant|MODERATE|811C>T|Pro271Ser
1077	nsp2 (807-2720)	C|T|protein_coding|missense_variant|MODERATE|812C>T|Pro271Leu
1077	nsp2 (807-2720)	C|A|protein_coding|missense_variant|MODERATE|812C>A|Pro271Gln
1079	nsp2 (807-2720)	A|C|protein_coding|missense_variant|MODERATE|814A>C|Asn272His
1080	nsp2 (807-2720)	A|G|protein_coding|missense_variant|MODERATE|815A>G|Asn272Ser
1085	nsp2 (807-2720)	G|T|protein_coding|missense_variant|MODERATE|820G>T|Val274Leu
1087	nsp2 (807-2720)	A|G|protein_coding|synonymous_variant|LOW|822A>G|Val274Val
1090	nsp2 (807-2720)	T|C|protein_coding|synonymous_variant|LOW|825T>C|Phe275Phe
1091	nsp2 (807-2720)	C|T|protein_coding|missense_variant|MODERATE|826C>T|Pro276Ser
1093	nsp2 (807-2720)	C|T|protein_coding|synonymous_variant|LOW|828C>T|Pro276Pro
1094	nsp2 (807-2720)	T|C|protein_coding|synonymous_variant|LOW|829T>C|Leu277Leu
1096	nsp2 (807-2720)	A|G|protein_coding|synonymous_variant|LOW|831A>G|Leu277Leu
1097	nsp2 (807-2720)	A|G|protein_coding|missense_variant|MODERATE|832A>G|Asn278Asp
1097	nsp2 (807-2720)	A|C|protein_coding|missense_variant|MODERATE|832A>C|Asn278His
1098	nsp2 (807-2720)	A|G|protein_coding|missense_variant|MODERATE|833A>G|Asn278Ser
1098	nsp2 (807-2720)	A|C|protein_coding|missense_variant|MODERATE|833A>C|Asn278Thr
1099	nsp2 (807-2720)	T|C|protein_coding|synonymous_variant|LOW|834T>C|Asn278Asn
1100	nsp2 (807-2720)	T|A|protein_coding|missense_variant|MODERATE|835T>A|Ser279Thr
1100	nsp2 (807-2720)	T|G|protein_coding|missense_variant|MODERATE|835T>G|Ser279Ala
1101	nsp2 (807-2720)	C|T|protein_coding|missense_variant|MODERATE|836C>T|Ser279Phe
1101	nsp2 (807-2720)	C|A|protein_coding|missense_variant|MODERATE|836C>A|Ser279Tyr
1102	nsp2 (807-2720)	C|T|protein_coding|synonymous_variant|LOW|837C>T|Ser279Ser
1102	nsp2 (807-2720)	C|A|protein_coding|synonymous_variant|LOW|837C>A|Ser279Ser
1103	nsp2 (807-2720)	A|G|protein_coding|missense_variant|MODERATE|838A>G|Ile280Val
1103	nsp2 (807-2720)	A|T|protein_coding|missense_variant|MODERATE|838A>T|Ile280Leu
1103	nsp2 (807-2720)	A|C|protein_coding|missense_variant|MODERATE|838A>C|Ile280Leu
1104	nsp2 (807-2720)	T|A|protein_coding|missense_variant|MODERATE|839T>A|Ile280Lys
1105	nsp2 (807-2720)	A|G|protein_coding|missense_variant|MODERATE|840A>G|Ile280Met
1106	nsp2 (807-2720)	A|T|protein_coding|missense_variant|MODERATE|841A>T|Ile281Phe
1107	nsp2 (807-2720)	T|C|protein_coding|missense_variant|MODERATE|842T>C|Ile281Thr
1108	nsp2 (807-2720)	C|T|protein_coding|synonymous_variant|LOW|843C>T|Ile281Ile
1111	nsp2 (807-2720)	G|A|protein_coding|synonymous_variant|LOW|846G>A|Lys282Lys
1112	nsp2 (807-2720)	A|G|protein_coding|missense_variant|MODERATE|847A>G|Thr283Ala
1113	nsp2 (807-2720)	C|T|protein_coding|missense_variant|MODERATE|848C>T|Thr283Ile
1114	nsp2 (807-2720)	T|A|protein_coding|synonymous_variant|LOW|849T>A|Thr283Thr
1114	nsp2 (807-2720)	T|C|protein_coding|synonymous_variant|LOW|849T>C|Thr283Thr
1115	nsp2 (807-2720)	A|G|protein_coding|missense_variant|MODERATE|850A>G|Ile284Val
1116	nsp2 (807-2720)	T|G|protein_coding|missense_variant|MODERATE|851T>G|Ile284Ser
1117	nsp2 (807-2720)	T|C|protein_coding|synonymous_variant|LOW|852T>C|Ile284Ile
1119	nsp2 (807-2720)	A|C|protein_coding|missense_variant|MODERATE|854A>C|Gln285Pro
1121	nsp2 (807-2720)	C|T|protein_coding|missense_variant|MODERATE|856C>T|Pro286Ser
1123	nsp2 (807-2720)	A|G|protein_coding|synonymous_variant|LOW|858A>G|Pro286Pro
1123	nsp2 (807-2720)	A|T|protein_coding|synonymous_variant|LOW|858A>T|Pro286Pro
1124	nsp2 (807-2720)	A|G|protein_coding|missense_variant|MODERATE|859A>G|Arg287Gly
1124	nsp2 (807-2720)	A|C|protein_coding|synonymous_variant|LOW|859A>C|Arg287Arg
1125	nsp2 (807-2720)	G|A|protein_coding|missense_variant|MODERATE|860G>A|Arg287Lys
1126	nsp2 (807-2720)	G|T|protein_coding|missense_variant|MODERATE|861G>T|Arg287Ser
1127	nsp2 (807-2720)	G|T|protein_coding|missense_variant|MODERATE|862G>T|Val288Phe
1132	nsp2 (807-2720)	A|G|protein_coding|synonymous_variant|LOW|867A>G|Glu289Glu
1133	nsp2 (807-2720)	A|T|protein_coding|stop_gained|HIGH|868A>T|Lys290*
1134	nsp2 (807-2720)	A|C|protein_coding|missense_variant|MODERATE|869A>C|Lys290Thr
1134	nsp2 (807-2720)	A|T|protein_coding|missense_variant|MODERATE|869A>T|Lys290Met
1135	nsp2 (807-2720)	G|T|protein_coding|missense_variant|MODERATE|870G>T|Lys290Asn
1135	nsp2 (807-2720)	G|A|protein_coding|synonymous_variant|LOW|870G>A|Lys290Lys
1136	nsp2 (807-2720)	A|G|protein_coding|missense_variant|MODERATE|871A>G|Lys291Glu
1139	nsp2 (807-2720)	A|G|protein_coding|missense_variant|MODERATE|874A>G|Lys292Glu
1140	nsp2 (807-2720)	A|C|protein_coding|missense_variant|MODERATE|875A>C|Lys292Thr
1141	nsp2 (807-2720)	G|T|protein_coding|missense_variant|MODERATE|876G>T|Lys292Asn
1142	nsp2 (807-2720)	C|T|protein_coding|missense_variant|MODERATE|877C>T|Leu293Phe
1145	nsp2 (807-2720)	G|A|protein_coding|missense_variant|MODERATE|880G>A|Asp294Asn
1146	nsp2 (807-2720)	A|G|protein_coding|missense_variant|MODERATE|881A>G|Asp294Gly
1148	nsp2 (807-2720)	G|T|protein_coding|missense_variant|MODERATE|883G>T|Gly295Cys
1148	nsp2 (807-2720)	G|A|protein_coding|missense_variant|MODERATE|883G>A|Gly295Ser
1149	nsp2 (807-2720)	G|A|protein_coding|missense_variant|MODERATE|884G>A|Gly295Asp
1149	nsp2 (807-2720)	G|T|protein_coding|missense_variant|MODERATE|884G>T|Gly295Val
1150	nsp2 (807-2720)	C|T|protein_coding|synonymous_variant|LOW|885C>T|Gly295Gly
1154	nsp2 (807-2720)	A|G|protein_coding|missense_variant|MODERATE|889A>G|Met297Val
1155	nsp2 (807-2720)	T|C|protein_coding|missense_variant|MODERATE|890T>C|Met297Thr
1155	nsp2 (807-2720)	T|A|protein_coding|missense_variant|MODERATE|890T>A|Met297Lys
1156	nsp2 (807-2720)	G|A|protein_coding|missense_variant|MODERATE|891G>A|Met297Ile
1156	nsp2 (807-2720)	G|T|protein_coding|missense_variant|MODERATE|891G>T|Met297Ile
1157	nsp2 (807-2720)	G|T|protein_coding|missense_variant|MODERATE|892G>T|Gly298Cys
1158	nsp2 (807-2720)	G|A|protein_coding|missense_variant|MODERATE|893G>A|Gly298Asp
1158	nsp2 (807-2720)	G|T|protein_coding|missense_variant|MODERATE|893G>T|Gly298Val
1161	nsp2 (807-2720)	G|A|protein_coding|missense_variant|MODERATE|896G>A|Arg299Lys
1162	nsp2 (807-2720)	A|G|protein_coding|synonymous_variant|LOW|897A>G|Arg299Arg
1163	nsp2 (807-2720)	A|T|protein_coding|missense_variant|MODERATE|898A>T|Ile300Phe
1163	nsp2 (807-2720)	A|G|protein_coding|missense_variant|MODERATE|898A>G|Ile300Val
1165	nsp2 (807-2720)	T|C|protein_coding|synonymous_variant|LOW|900T>C|Ile300Ile
1165	nsp2 (807-2720)	T|G|protein_coding|missense_variant|MODERATE|900T>G|Ile300Met
1166	nsp2 (807-2720)	C|A|protein_coding|synonymous_variant|LOW|901C>A|Arg301Arg
1167	nsp2 (807-2720)	G|A|protein_coding|missense_variant|MODERATE|902G>A|Arg301Gln
1167	nsp2 (807-2720)	G|T|protein_coding|missense_variant|MODERATE|902G>T|Arg301Leu
1168	nsp2 (807-2720)	A|G|protein_coding|synonymous_variant|LOW|903A>G|Arg301Arg
1169	nsp2 (807-2720)	T|C|protein_coding|missense_variant|MODERATE|904T>C|Ser302Pro
1170	nsp2 (807-2720)	C|T|protein_coding|missense_variant|MODERATE|905C>T|Ser302Phe
1172	nsp2 (807-2720)	G|T|protein_coding|missense_variant|MODERATE|907G>T|Val303Phe
1174	nsp2 (807-2720)	C|T|protein_coding|synonymous_variant|LOW|909C>T|Val303Val
1176	nsp2 (807-2720)	A|T|protein_coding|missense_variant|MODERATE|911A>T|Tyr304Phe
1177	nsp2 (807-2720)	T|C|protein_coding|synonymous_variant|LOW|912T>C|Tyr304Tyr
1178	nsp2 (807-2720)	C|T|protein_coding|missense_variant|MODERATE|913C>T|Pro305Ser
1179	nsp2 (807-2720)	C|T|protein_coding|missense_variant|MODERATE|914C>T|Pro305Leu
1180	nsp2 (807-2720)	A|T|protein_coding|synonymous_variant|LOW|915A>T|Pro305Pro
1181	nsp2 (807-2720)	G|T|protein_coding|missense_variant|MODERATE|916G>T|Val306Phe
1185	nsp2 (807-2720)	C|T|protein_coding|missense_variant|MODERATE|920C>T|Ala307Val
1186	nsp2 (807-2720)	G|A|protein_coding|synonymous_variant|LOW|921G>A|Ala307Ala
1186	nsp2 (807-2720)	G|T|protein_coding|synonymous_variant|LOW|921G>T|Ala307Ala
1186	nsp2 (807-2720)	G|C|protein_coding|synonymous_variant|LOW|921G>C|Ala307Ala
1187	nsp2 (807-2720)	T|C|protein_coding|missense_variant|MODERATE|922T>C|Ser308Pro
1188	nsp2 (807-2720)	C|T|protein_coding|missense_variant|MODERATE|923C>T|Ser308Leu
1189	nsp2 (807-2720)	A|G|protein_coding|synonymous_variant|LOW|924A>G|Ser308Ser
1190	nsp2 (807-2720)	C|G|protein_coding|missense_variant|MODERATE|925C>G|Pro309Ala
1191	nsp2 (807-2720)	C|A|protein_coding|missense_variant|MODERATE|926C>A|Pro309Gln
1193	nsp2 (807-2720)	A|G|protein_coding|missense_variant|MODERATE|928A>G|Asn310Asp
1195	nsp2 (807-2720)	T|C|protein_coding|synonymous_variant|LOW|930T>C|Asn310Asn
1201	nsp2 (807-2720)	C|T|protein_coding|synonymous_variant|LOW|936C>T|Cys312Cys
1202	nsp2 (807-2720)	A|G|protein_coding|missense_variant|MODERATE|937A>G|Asn313Asp
1203	nsp2 (807-2720)	A|G|protein_coding|missense_variant|MODERATE|938A>G|Asn313Ser
1204	nsp2 (807-2720)	C|T|protein_coding|synonymous_variant|LOW|939C>T|Asn313Asn
1207	nsp2 (807-2720)	A|G|protein_coding|synonymous_variant|LOW|942A>G|Gln314Gln
1208	nsp2 (807-2720)	A|G|protein_coding|missense_variant|MODERATE|943A>G|Met315Val
1209	nsp2 (807-2720)	T|C|protein_coding|missense_variant|MODERATE|944T>C|Met315Thr
1210	nsp2 (807-2720)	G|T|protein_coding|missense_variant|MODERATE|945G>T|Met315Ile
1210	nsp2 (807-2720)	G|A|protein_coding|missense_variant|MODERATE|945G>A|Met315Ile
1211	nsp2 (807-2720)	T|G|protein_coding|missense_variant|MODERATE|946T>G|Cys316Gly
1211	nsp2 (807-2720)	T|A|protein_coding|missense_variant|MODERATE|946T>A|Cys316Ser
1212	nsp2 (807-2720)	G|C|protein_coding|missense_variant|MODERATE|947G>C|Cys316Ser
1213	nsp2 (807-2720)	C|T|protein_coding|synonymous_variant|LOW|948C>T|Cys316Cys
1214	nsp2 (807-2720)	C|T|protein_coding|missense_variant|MODERATE|949C>T|Leu317Phe
1215	nsp2 (807-2720)	T|C|protein_coding|missense_variant|MODERATE|950T>C|Leu317Pro
1216	nsp2 (807-2720)	T|C|protein_coding|synonymous_variant|LOW|951T>C|Leu317Leu
1218	nsp2 (807-2720)	C|T|protein_coding|missense_variant|MODERATE|953C>T|Ser318Leu
1221	nsp2 (807-2720)	C|T|protein_coding|missense_variant|MODERATE|956C>T|Thr319Ile
1222	nsp2 (807-2720)	T|C|protein_coding|synonymous_variant|LOW|957T>C|Thr319Thr
1223	nsp2 (807-2720)	C|T|protein_coding|missense_variant|MODERATE|958C>T|Leu320Phe
1225	nsp2 (807-2720)	C|T|protein_coding|synonymous_variant|LOW|960C>T|Leu320Leu
1225	nsp2 (807-2720)	C|A|protein_coding|synonymous_variant|LOW|960C>A|Leu320Leu
1226	nsp2 (807-2720)	A|C|protein_coding|missense_variant|MODERATE|961A>C|Met321Leu
1228	nsp2 (807-2720)	G|A|protein_coding|missense_variant|MODERATE|963G>A|Met321Ile
1228	nsp2 (807-2720)	G|T|protein_coding|missense_variant|MODERATE|963G>T|Met321Ile
1230	nsp2 (807-2720)	A|G|protein_coding|missense_variant|MODERATE|965A>G|Lys322Arg
1234	nsp2 (807-2720)	T|C|protein_coding|synonymous_variant|LOW|969T>C|Cys323Cys
1237	nsp2 (807-2720)	T|C|protein_coding|synonymous_variant|LOW|972T>C|Asp324Asp
1238	nsp2 (807-2720)	C|T|protein_coding|missense_variant|MODERATE|973C>T|His325Tyr
1238	nsp2 (807-2720)	C|A|protein_coding|missense_variant|MODERATE|973C>A|His325Asn
1239	nsp2 (807-2720)	A|G|protein_coding|missense_variant|MODERATE|974A>G|His325Arg
1243	nsp2 (807-2720)	T|C|protein_coding|synonymous_variant|LOW|978T>C|Cys326Cys
1244	nsp2 (807-2720)	G|A|protein_coding|missense_variant|MODERATE|979G>A|Gly327Ser
1244	nsp2 (807-2720)	G|T|protein_coding|missense_variant|MODERATE|979G>T|Gly327Cys
1245	nsp2 (807-2720)	G|A|protein_coding|missense_variant|MODERATE|980G>A|Gly327Asp
1251	nsp2 (807-2720)	C|T|protein_coding|missense_variant|MODERATE|986C>T|Thr329Ile
1251	nsp2 (807-2720)	C|A|protein_coding|missense_variant|MODERATE|986C>A|Thr329Asn
1252	nsp2 (807-2720)	T|G|protein_coding|synonymous_variant|LOW|987T>G|Thr329Thr
1254	nsp2 (807-2720)	C|T|protein_coding|missense_variant|MODERATE|989C>T|Ser330Leu
1255	nsp2 (807-2720)	A|G|protein_coding|synonymous_variant|LOW|990A>G|Ser330Ser
1260	nsp2 (807-2720)	A|T|protein_coding|missense_variant|MODERATE|995A>T|Gln332Leu
1261	nsp2 (807-2720)	G|A|protein_coding|synonymous_variant|LOW|996G>A|Gln332Gln
1262	nsp2 (807-2720)	A|G|protein_coding|missense_variant|MODERATE|997A>G|Thr333Ala
1262	nsp2 (807-2720)	A|C|protein_coding|missense_variant|MODERATE|997A>C|Thr333Pro
1263	nsp2 (807-2720)	C|T|protein_coding|missense_variant|MODERATE|998C>T|Thr333Met
1264	nsp2 (807-2720)	G|T|protein_coding|synonymous_variant|LOW|999G>T|Thr333Thr
1264	nsp2 (807-2720)	G|A|protein_coding|synonymous_variant|LOW|999G>A|Thr333Thr
1265	nsp2 (807-2720)	G|T|protein_coding|missense_variant|MODERATE|1000G>T|Gly334Cys
1265	nsp2 (807-2720)	G|A|protein_coding|missense_variant|MODERATE|1000G>A|Gly334Ser
1267	nsp2 (807-2720)	C|T|protein_coding|synonymous_variant|LOW|1002C>T|Gly334Gly
1268	nsp2 (807-2720)	G|A|protein_coding|missense_variant|MODERATE|1003G>A|Asp335Asn
1269	nsp2 (807-2720)	A|G|protein_coding|missense_variant|MODERATE|1004A>G|Asp335Gly
1270	nsp2 (807-2720)	T|C|protein_coding|synonymous_variant|LOW|1005T>C|Asp335Asp
1274	nsp2 (807-2720)	G|T|protein_coding|missense_variant|MODERATE|1009G>T|Val337Phe
1278	nsp2 (807-2720)	A|G|protein_coding|missense_variant|MODERATE|1013A>G|Lys338Arg
1281	nsp2 (807-2720)	C|T|protein_coding|missense_variant|MODERATE|1016C>T|Ala339Val
1281	nsp2 (807-2720)	C|A|protein_coding|missense_variant|MODERATE|1016C>A|Ala339Asp
1282	nsp2 (807-2720)	C|T|protein_coding|synonymous_variant|LOW|1017C>T|Ala339Ala
1283	nsp2 (807-2720)	A|G|protein_coding|missense_variant|MODERATE|1018A>G|Thr340Ala
1284	nsp2 (807-2720)	C|T|protein_coding|missense_variant|MODERATE|1019C>T|Thr340Ile
1285	nsp2 (807-2720)	T|C|protein_coding|synonymous_variant|LOW|1020T>C|Thr340Thr
1288	nsp2 (807-2720)	C|T|protein_coding|synonymous_variant|LOW|1023C>T|Cys341Cys
1294	nsp2 (807-2720)	T|C|protein_coding|synonymous_variant|LOW|1029T>C|Phe343Phe
1296	nsp2 (807-2720)	G|T|protein_coding|missense_variant|MODERATE|1031G>T|Cys344Phe
1298	nsp2 (807-2720)	G|A|protein_coding|missense_variant|MODERATE|1033G>A|Gly345Ser
1299	nsp2 (807-2720)	G|T|protein_coding|missense_variant|MODERATE|1034G>T|Gly345Val
1300	nsp2 (807-2720)	C|T|protein_coding|synonymous_variant|LOW|1035C>T|Gly345Gly
1302	nsp2 (807-2720)	C|T|protein_coding|missense_variant|MODERATE|1037C>T|Thr346Ile
1302	nsp2 (807-2720)	C|A|protein_coding|missense_variant|MODERATE|1037C>A|Thr346Asn
1303	nsp2 (807-2720)	T|C|protein_coding|synonymous_variant|LOW|1038T>C|Thr346Thr
1305	nsp2 (807-2720)	A|G|protein_coding|missense_variant|MODERATE|1040A>G|Glu347Gly
1305	nsp2 (807-2720)	A|T|protein_coding|missense_variant|MODERATE|1040A>T|Glu347Val
1306	nsp2 (807-2720)	G|T|protein_coding|missense_variant|MODERATE|1041G>T|Glu347Asp
1308	nsp2 (807-2720)	A|G|protein_coding|missense_variant|MODERATE|1043A>G|Asn348Ser
1311	nsp2 (807-2720)	T|C|protein_coding|missense_variant|MODERATE|1046T>C|Leu349Ser
1312	nsp2 (807-2720)	G|T|protein_coding|missense_variant|MODERATE|1047G>T|Leu349Phe
1313	nsp2 (807-2720)	A|G|protein_coding|missense_variant|MODERATE|1048A>G|Thr350Ala
1314	nsp2 (807-2720)	C|T|protein_coding|missense_variant|MODERATE|1049C>T|Thr350Ile
1317	nsp2 (807-2720)	A|G|protein_coding|missense_variant|MODERATE|1052A>G|Lys351Arg
1319	nsp2 (807-2720)	G|A|protein_coding|missense_variant|MODERATE|1054G>A|Glu352Lys
1320	nsp2 (807-2720)	A|C|protein_coding|missense_variant|MODERATE|1055A>C|Glu352Ala
1321	nsp2 (807-2720)	A|C|protein_coding|missense_variant|MODERATE|1056A>C|Glu352Asp
1322	nsp2 (807-2720)	G|T|protein_coding|missense_variant|MODERATE|1057G>T|Gly353Cys
1322	nsp2 (807-2720)	G|A|protein_coding|missense_variant|MODERATE|1057G>A|Gly353Ser
1323	nsp2 (807-2720)	G|T|protein_coding|missense_variant|MODERATE|1058G>T|Gly353Val
1325	nsp2 (807-2720)	G|A|protein_coding|missense_variant|MODERATE|1060G>A|Ala354Thr
1326	nsp2 (807-2720)	C|T|protein_coding|missense_variant|MODERATE|1061C>T|Ala354Val
1329	nsp2 (807-2720)	C|T|protein_coding|missense_variant|MODERATE|1064C>T|Thr355Ile
1329	nsp2 (807-2720)	C|A|protein_coding|missense_variant|MODERATE|1064C>A|Thr355Asn
1331	nsp2 (807-2720)	A|G|protein_coding|missense_variant|MODERATE|1066A>G|Thr356Ala
1333	nsp2 (807-2720)	T|C|protein_coding|synonymous_variant|LOW|1068T>C|Thr356Thr
1333	nsp2 (807-2720)	T|A|protein_coding|synonymous_variant|LOW|1068T>A|Thr356Thr
1334	nsp2 (807-2720)	T|A|protein_coding|missense_variant|MODERATE|1069T>A|Cys357Ser
1339	nsp2 (807-2720)	T|C|protein_coding|synonymous_variant|LOW|1074T>C|Gly358Gly
1340	nsp2 (807-2720)	T|C|protein_coding|missense_variant|MODERATE|1075T>C|Tyr359His
1342	nsp2 (807-2720)	C|T|protein_coding|synonymous_variant|LOW|1077C>T|Tyr359Tyr
1342	nsp2 (807-2720)	C|A|protein_coding|stop_gained|HIGH|1077C>A|Tyr359*
1344	nsp2 (807-2720)	T|C|protein_coding|missense_variant|MODERATE|1079T>C|Leu360Ser
1346	nsp2 (807-2720)	C|T|protein_coding|missense_variant|MODERATE|1081C>T|Pro361Ser
1346	nsp2 (807-2720)	C|A|protein_coding|missense_variant|MODERATE|1081C>A|Pro361Thr
1347	nsp2 (807-2720)	C|T|protein_coding|missense_variant|MODERATE|1082C>T|Pro361Leu
1347	nsp2 (807-2720)	C|A|protein_coding|missense_variant|MODERATE|1082C>A|Pro361His
1348	nsp2 (807-2720)	C|T|protein_coding|synonymous_variant|LOW|1083C>T|Pro361Pro
1349	nsp2 (807-2720)	C|A|protein_coding|missense_variant|MODERATE|1084C>A|Gln362Lys
1350	nsp2 (807-2720)	A|T|protein_coding|missense_variant|MODERATE|1085A>T|Gln362Leu
1350	nsp2 (807-2720)	A|G|protein_coding|missense_variant|MODERATE|1085A>G|Gln362Arg
1351	nsp2 (807-2720)	A|G|protein_coding|synonymous_variant|LOW|1086A>G|Gln362Gln
1355	nsp2 (807-2720)	G|T|protein_coding|missense_variant|MODERATE|1090G>T|Ala364Ser
1357	nsp2 (807-2720)	T|G|protein_coding|synonymous_variant|LOW|1092T>G|Ala364Ala
1358	nsp2 (807-2720)	G|T|protein_coding|missense_variant|MODERATE|1093G>T|Val365Phe
1359	nsp2 (807-2720)	T|C|protein_coding|missense_variant|MODERATE|1094T>C|Val365Ala
1360	nsp2 (807-2720)	T|C|protein_coding|synonymous_variant|LOW|1095T>C|Val365Val
1365	nsp2 (807-2720)	A|C|protein_coding|missense_variant|MODERATE|1100A>C|Lys367Thr
1367	nsp2 (807-2720)	A|C|protein_coding|missense_variant|MODERATE|1102A>C|Ile368Leu
1368	nsp2 (807-2720)	T|C|protein_coding|missense_variant|MODERATE|1103T>C|Ile368Thr
1368	nsp2 (807-2720)	T|G|protein_coding|missense_variant|MODERATE|1103T>G|Ile368Ser
1372	nsp2 (807-2720)	T|C|protein_coding|synonymous_variant|LOW|1107T>C|Tyr369Tyr
1376	nsp2 (807-2720)	C|T|protein_coding|missense_variant|MODERATE|1111C>T|Pro371Ser
1376	nsp2 (807-2720)	C|G|protein_coding|missense_variant|MODERATE|1111C>G|Pro371Ala
1377	nsp2 (807-2720)	C|T|protein_coding|missense_variant|MODERATE|1112C>T|Pro371Leu
1378	nsp2 (807-2720)	A|C|protein_coding|synonymous_variant|LOW|1113A>C|Pro371Pro
1381	nsp2 (807-2720)	A|G|protein_coding|synonymous_variant|LOW|1116A>G|Ala372Ala
1384	nsp2 (807-2720)	T|C|protein_coding|synonymous_variant|LOW|1119T>C|Cys373Cys
1385	nsp2 (807-2720)	C|T|protein_coding|missense_variant|MODERATE|1120C>T|His374Tyr
1386	nsp2 (807-2720)	A|G|protein_coding|missense_variant|MODERATE|1121A>G|His374Arg
1387	nsp2 (807-2720)	C|T|protein_coding|synonymous_variant|LOW|1122C>T|His374His
1389	nsp2 (807-2720)	A|G|protein_coding|missense_variant|MODERATE|1124A>G|Asn375Ser
1391	nsp2 (807-2720)	T|G|protein_coding|missense_variant|MODERATE|1126T>G|Ser376Ala
1392	nsp2 (807-2720)	C|T|protein_coding|missense_variant|MODERATE|1127C>T|Ser376Leu
1394	nsp2 (807-2720)	G|A|protein_coding|missense_variant|MODERATE|1129G>A|Glu377Lys
1395	nsp2 (807-2720)	A|C|protein_coding|missense_variant|MODERATE|1130A>C|Glu377Ala
1396	nsp2 (807-2720)	A|G|protein_coding|synonymous_variant|LOW|1131A>G|Glu377Glu
1397	nsp2 (807-2720)	G|A|protein_coding|missense_variant|MODERATE|1132G>A|Val378Ile
1399	nsp2 (807-2720)	A|G|protein_coding|synonymous_variant|LOW|1134A>G|Val378Val
1399	nsp2 (807-2720)	A|T|protein_coding|synonymous_variant|LOW|1134A>T|Val378Val
1400	nsp2 (807-2720)	G|A|protein_coding|missense_variant|MODERATE|1135G>A|Gly379Arg
1401	nsp2 (807-2720)	G|A|protein_coding|missense_variant|MODERATE|1136G>A|Gly379Glu
1403	nsp2 (807-2720)	C|T|protein_coding|missense_variant|MODERATE|1138C>T|Pro380Ser
1404	nsp2 (807-2720)	C|T|protein_coding|missense_variant|MODERATE|1139C>T|Pro380Leu
1404	nsp2 (807-2720)	C|A|protein_coding|missense_variant|MODERATE|1139C>A|Pro380His
1405	nsp2 (807-2720)	T|C|protein_coding|synonymous_variant|LOW|1140T>C|Pro380Pro
1407	nsp2 (807-2720)	A|G|protein_coding|missense_variant|MODERATE|1142A>G|Glu381Gly
1407	nsp2 (807-2720)	A|C|protein_coding|missense_variant|MODERATE|1142A>C|Glu381Ala
1408	nsp2 (807-2720)	G|A|protein_coding|synonymous_variant|LOW|1143G>A|Glu381Glu
1408	nsp2 (807-2720)	G|T|protein_coding|missense_variant|MODERATE|1143G>T|Glu381Asp
1410	nsp2 (807-2720)	A|T|protein_coding|missense_variant|MODERATE|1145A>T|His382Leu
1412	nsp2 (807-2720)	A|G|protein_coding|missense_variant|MODERATE|1147A>G|Ser383Gly
1413	nsp2 (807-2720)	G|A|protein_coding|missense_variant|MODERATE|1148G>A|Ser383Asn
1413	nsp2 (807-2720)	G|T|protein_coding|missense_variant|MODERATE|1148G>T|Ser383Ile
1414	nsp2 (807-2720)	T|C|protein_coding|synonymous_variant|LOW|1149T>C|Ser383Ser
1415	nsp2 (807-2720)	C|T|protein_coding|missense_variant|MODERATE|1150C>T|Leu384Phe
1415	nsp2 (807-2720)	C|A|protein_coding|missense_variant|MODERATE|1150C>A|Leu384Ile
1416	nsp2 (807-2720)	T|C|protein_coding|missense_variant|MODERATE|1151T>C|Leu384Pro
1417	nsp2 (807-2720)	T|C|protein_coding|synonymous_variant|LOW|1152T>C|Leu384Leu
1417	nsp2 (807-2720)	T|A|protein_coding|synonymous_variant|LOW|1152T>A|Leu384Leu
1417	nsp2 (807-2720)	T|G|protein_coding|synonymous_variant|LOW|1152T>G|Leu384Leu
1419	nsp2 (807-2720)	C|T|protein_coding|missense_variant|MODERATE|1154C>T|Ala385Val
1420	nsp2 (807-2720)	C|T|protein_coding|synonymous_variant|LOW|1155C>T|Ala385Ala
1421	nsp2 (807-2720)	G|A|protein_coding|missense_variant|MODERATE|1156G>A|Glu386Lys
1422	nsp2 (807-2720)	A|G|protein_coding|missense_variant|MODERATE|1157A>G|Glu386Gly
1423	nsp2 (807-2720)	A|C|protein_coding|missense_variant|MODERATE|1158A>C|Glu386Asp
1426	nsp2 (807-2720)	C|T|protein_coding|synonymous_variant|LOW|1161C>T|Tyr387Tyr
1427	nsp2 (807-2720)	C|T|protein_coding|missense_variant|MODERATE|1162C>T|His388Tyr
1428	nsp2 (807-2720)	A|G|protein_coding|missense_variant|MODERATE|1163A>G|His388Arg
1430	nsp2 (807-2720)	A|G|protein_coding|missense_variant|MODERATE|1165A>G|Asn389Asp
1435	nsp2 (807-2720)	A|G|protein_coding|synonymous_variant|LOW|1170A>G|Glu390Glu
1437	nsp2 (807-2720)	C|T|protein_coding|missense_variant|MODERATE|1172C>T|Ser391Phe
1438	nsp2 (807-2720)	T|A|protein_coding|synonymous_variant|LOW|1173T>A|Ser391Ser
1438	nsp2 (807-2720)	T|C|protein_coding|synonymous_variant|LOW|1173T>C|Ser391Ser
1439	nsp2 (807-2720)	G|T|protein_coding|missense_variant|MODERATE|1174G>T|Gly392Cys
1439	nsp2 (807-2720)	G|A|protein_coding|missense_variant|MODERATE|1174G>A|Gly392Ser
1440	nsp2 (807-2720)	G|A|protein_coding|missense_variant|MODERATE|1175G>A|Gly392Asp
1440	nsp2 (807-2720)	G|T|protein_coding|missense_variant|MODERATE|1175G>T|Gly392Val
1441	nsp2 (807-2720)	C|T|protein_coding|synonymous_variant|LOW|1176C>T|Gly392Gly
1444	nsp2 (807-2720)	G|A|protein_coding|synonymous_variant|LOW|1179G>A|Leu393Leu
1445	nsp2 (807-2720)	A|G|protein_coding|missense_variant|MODERATE|1180A>G|Lys394Glu
1449	nsp2 (807-2720)	C|T|protein_coding|missense_variant|MODERATE|1184C>T|Thr395Ile
1450	nsp2 (807-2720)	C|T|protein_coding|synonymous_variant|LOW|1185C>T|Thr395Thr
1450	nsp2 (807-2720)	C|A|protein_coding|synonymous_variant|LOW|1185C>A|Thr395Thr
1452	nsp2 (807-2720)	T|C|protein_coding|missense_variant|MODERATE|1187T>C|Ile396Thr
1454	nsp2 (807-2720)	C|T|protein_coding|missense_variant|MODERATE|1189C>T|Leu397Phe
1455	nsp2 (807-2720)	T|C|protein_coding|missense_variant|MODERATE|1190T>C|Leu397Pro
1455	nsp2 (807-2720)	T|G|protein_coding|missense_variant|MODERATE|1190T>G|Leu397Arg
1457	nsp2 (807-2720)	C|T|protein_coding|missense_variant|MODERATE|1192C>T|Arg398Cys
1458	nsp2 (807-2720)	G|T|protein_coding|missense_variant|MODERATE|1193G>T|Arg398Leu
1458	nsp2 (807-2720)	G|A|protein_coding|missense_variant|MODERATE|1193G>A|Arg398His
1461	nsp2 (807-2720)	A|G|protein_coding|missense_variant|MODERATE|1196A>G|Lys399Arg
1462	nsp2 (807-2720)	G|T|protein_coding|missense_variant|MODERATE|1197G>T|Lys399Asn
1462	nsp2 (807-2720)	G|A|protein_coding|synonymous_variant|LOW|1197G>A|Lys399Lys
1463	nsp2 (807-2720)	G|A|protein_coding|missense_variant|MODERATE|1198G>A|Gly400Ser
1463	nsp2 (807-2720)	G|T|protein_coding|missense_variant|MODERATE|1198G>T|Gly400Cys
1464	nsp2 (807-2720)	G|A|protein_coding|missense_variant|MODERATE|1199G>A|Gly400Asp
1465	nsp2 (807-2720)	T|C|protein_coding|synonymous_variant|LOW|1200T>C|Gly400Gly
1466	nsp2 (807-2720)	G|A|protein_coding|missense_variant|MODERATE|1201G>A|Gly401Ser
1466	nsp2 (807-2720)	G|T|protein_coding|missense_variant|MODERATE|1201G>T|Gly401Cys
1467	nsp2 (807-2720)	G|A|protein_coding|missense_variant|MODERATE|1202G>A|Gly401Asp
1469	nsp2 (807-2720)	C|T|protein_coding|missense_variant|MODERATE|1204C>T|Arg402Cys
1470	nsp2 (807-2720)	G|A|protein_coding|missense_variant|MODERATE|1205G>A|Arg402His
1470	nsp2 (807-2720)	G|T|protein_coding|missense_variant|MODERATE|1205G>T|Arg402Leu
1471	nsp2 (807-2720)	C|T|protein_coding|synonymous_variant|LOW|1206C>T|Arg402Arg
1471	nsp2 (807-2720)	C|G|protein_coding|synonymous_variant|LOW|1206C>G|Arg402Arg
1473	nsp2 (807-2720)	C|T|protein_coding|missense_variant|MODERATE|1208C>T|Thr403Ile
1473	nsp2 (807-2720)	C|A|protein_coding|missense_variant|MODERATE|1208C>A|Thr403Asn
1475	nsp2 (807-2720)	A|C|protein_coding|missense_variant|MODERATE|1210A>C|Ile404Leu
1476	nsp2 (807-2720)	T|G|protein_coding|missense_variant|MODERATE|1211T>G|Ile404Ser
1477	nsp2 (807-2720)	T|A|protein_coding|synonymous_variant|LOW|1212T>A|Ile404Ile
1477	nsp2 (807-2720)	T|C|protein_coding|synonymous_variant|LOW|1212T>C|Ile404Ile
1478	nsp2 (807-2720)	G|A|protein_coding|missense_variant|MODERATE|1213G>A|Ala405Thr
1479	nsp2 (807-2720)	C|A|protein_coding|missense_variant|MODERATE|1214C>A|Ala405Asp
1480	nsp2 (807-2720)	C|A|protein_coding|synonymous_variant|LOW|1215C>A|Ala405Ala
1480	nsp2 (807-2720)	C|T|protein_coding|synonymous_variant|LOW|1215C>T|Ala405Ala
1483	nsp2 (807-2720)	T|C|protein_coding|synonymous_variant|LOW|1218T>C|Phe406Phe
1483	nsp2 (807-2720)	T|A|protein_coding|missense_variant|MODERATE|1218T>A|Phe406Leu
1486	nsp2 (807-2720)	A|C|protein_coding|synonymous_variant|LOW|1221A>C|Gly407Gly
1487	nsp2 (807-2720)	G|A|protein_coding|missense_variant|MODERATE|1222G>A|Gly408Ser
1487	nsp2 (807-2720)	G|T|protein_coding|missense_variant|MODERATE|1222G>T|Gly408Cys
1489	nsp2 (807-2720)	C|T|protein_coding|synonymous_variant|LOW|1224C>T|Gly408Gly
1489	nsp2 (807-2720)	C|A|protein_coding|synonymous_variant|LOW|1224C>A|Gly408Gly
1490	nsp2 (807-2720)	T|A|protein_coding|missense_variant|MODERATE|1225T>A|Cys409Ser
1493	nsp2 (807-2720)	G|A|protein_coding|missense_variant|MODERATE|1228G>A|Val410Met
1494	nsp2 (807-2720)	T|C|protein_coding|missense_variant|MODERATE|1229T>C|Val410Ala
1495	nsp2 (807-2720)	G|T|protein_coding|synonymous_variant|LOW|1230G>T|Val410Val
1498	nsp2 (807-2720)	C|T|protein_coding|synonymous_variant|LOW|1233C>T|Phe411Phe
1500	nsp2 (807-2720)	C|T|protein_coding|missense_variant|MODERATE|1235C>T|Ser412Phe
1501	nsp2 (807-2720)	T|C|protein_coding|synonymous_variant|LOW|1236T>C|Ser412Ser
1505	nsp2 (807-2720)	G|A|protein_coding|missense_variant|MODERATE|1240G>A|Val414Ile
1508	nsp2 (807-2720)	G|A|protein_coding|missense_variant|MODERATE|1243G>A|Gly415Ser
1510	nsp2 (807-2720)	T|C|protein_coding|synonymous_variant|LOW|1245T>C|Gly415Gly
1513	nsp2 (807-2720)	C|T|protein_coding|synonymous_variant|LOW|1248C>T|Cys416Cys
1514	nsp2 (807-2720)	C|T|protein_coding|missense_variant|MODERATE|1249C>T|His417Tyr
1514	nsp2 (807-2720)	C|A|protein_coding|missense_variant|MODERATE|1249C>A|His417Asn
1515	nsp2 (807-2720)	A|G|protein_coding|missense_variant|MODERATE|1250A>G|His417Arg
1516	nsp2 (807-2720)	T|C|protein_coding|synonymous_variant|LOW|1251T>C|His417His
1519	nsp2 (807-2720)	C|T|protein_coding|synonymous_variant|LOW|1254C>T|Asn418Asn
1520	nsp2 (807-2720)	A|G|protein_coding|missense_variant|MODERATE|1255A>G|Lys419Glu
1521	nsp2 (807-2720)	A|G|protein_coding|missense_variant|MODERATE|1256A>G|Lys419Arg
1523	nsp2 (807-2720)	T|A|protein_coding|missense_variant|MODERATE|1258T>A|Cys420Ser
1524	nsp2 (807-2720)	G|A|protein_coding|missense_variant|MODERATE|1259G>A|Cys420Tyr
1525	nsp2 (807-2720)	T|C|protein_coding|synonymous_variant|LOW|1260T>C|Cys420Cys
1526	nsp2 (807-2720)	G|T|protein_coding|missense_variant|MODERATE|1261G>T|Ala421Ser
1528	nsp2 (807-2720)	C|T|protein_coding|synonymous_variant|LOW|1263C>T|Ala421Ala
1530	nsp2 (807-2720)	A|G|protein_coding|missense_variant|MODERATE|1265A>G|Tyr422Cys
1535	nsp2 (807-2720)	G|A|protein_coding|missense_variant|MODERATE|1270G>A|Val424Ile
1536	nsp2 (807-2720)	T|C|protein_coding|missense_variant|MODERATE|1271T>C|Val424Ala
1537	nsp2 (807-2720)	T|C|protein_coding|synonymous_variant|LOW|1272T>C|Val424Val
1540	nsp2 (807-2720)	A|G|protein_coding|synonymous_variant|LOW|1275A>G|Pro425Pro
1541	nsp2 (807-2720)	C|T|protein_coding|missense_variant|MODERATE|1276C>T|Arg426Cys
1545	nsp2 (807-2720)	C|T|protein_coding|missense_variant|MODERATE|1280C>T|Ala427Val
1547	nsp2 (807-2720)	A|G|protein_coding|missense_variant|MODERATE|1282A>G|Ser428Gly
1548	nsp2 (807-2720)	G|A|protein_coding|missense_variant|MODERATE|1283G>A|Ser428Asn
1549	nsp2 (807-2720)	C|T|protein_coding|synonymous_variant|LOW|1284C>T|Ser428Ser
1550	nsp2 (807-2720)	G|A|protein_coding|missense_variant|MODERATE|1285G>A|Ala429Thr
1551	nsp2 (807-2720)	C|T|protein_coding|missense_variant|MODERATE|1286C>T|Ala429Val
1555	nsp2 (807-2720)	C|T|protein_coding|synonymous_variant|LOW|1290C>T|Asn430Asn
1555	nsp2 (807-2720)	C|A|protein_coding|missense_variant|MODERATE|1290C>A|Asn430Lys
1556	nsp2 (807-2720)	A|G|protein_coding|missense_variant|MODERATE|1291A>G|Ile431Val
1558	nsp2 (807-2720)	A|G|protein_coding|missense_variant|MODERATE|1293A>G|Ile431Met
1559	nsp2 (807-2720)	G|T|protein_coding|missense_variant|MODERATE|1294G>T|Gly432Cys
1562	nsp2 (807-2720)	T|C|protein_coding|missense_variant|MODERATE|1297T>C|Cys433Arg
1563	nsp2 (807-2720)	G|A|protein_coding|missense_variant|MODERATE|1298G>A|Cys433Tyr
1563	nsp2 (807-2720)	G|T|protein_coding|missense_variant|MODERATE|1298G>T|Cys433Phe
1565	nsp2 (807-2720)	A|G|protein_coding|missense_variant|MODERATE|1300A>G|Asn434Asp
1566	nsp2 (807-2720)	A|G|protein_coding|missense_variant|MODERATE|1301A>G|Asn434Ser
1566	nsp2 (807-2720)	A|C|protein_coding|missense_variant|MODERATE|1301A>C|Asn434Thr
1567	nsp2 (807-2720)	C|T|protein_coding|synonymous_variant|LOW|1302C>T|Asn434Asn
1568	nsp2 (807-2720)	C|T|protein_coding|missense_variant|MODERATE|1303C>T|His435Tyr
1570	nsp2 (807-2720)	T|C|protein_coding|synonymous_variant|LOW|1305T>C|His435His
1571	nsp2 (807-2720)	A|G|protein_coding|missense_variant|MODERATE|1306A>G|Thr436Ala
1572	nsp2 (807-2720)	C|T|protein_coding|missense_variant|MODERATE|1307C>T|Thr436Ile
1573	nsp2 (807-2720)	A|G|protein_coding|synonymous_variant|LOW|1308A>G|Thr436Thr
1574	nsp2 (807-2720)	G|T|protein_coding|missense_variant|MODERATE|1309G>T|Gly437Cys
1576	nsp2 (807-2720)	T|C|protein_coding|synonymous_variant|LOW|1311T>C|Gly437Gly
1577	nsp2 (807-2720)	G|T|protein_coding|missense_variant|MODERATE|1312G>T|Val438Phe
1579	nsp2 (807-2720)	T|A|protein_coding|synonymous_variant|LOW|1314T>A|Val438Val
1580	nsp2 (807-2720)	G|A|protein_coding|missense_variant|MODERATE|1315G>A|Val439Ile
1580	nsp2 (807-2720)	G|T|protein_coding|missense_variant|MODERATE|1315G>T|Val439Phe
1582	nsp2 (807-2720)	T|C|protein_coding|synonymous_variant|LOW|1317T>C|Val439Val
1583	nsp2 (807-2720)	G|A|protein_coding|missense_variant|MODERATE|1318G>A|Gly440Arg
1584	nsp2 (807-2720)	G|A|protein_coding|missense_variant|MODERATE|1319G>A|Gly440Glu
1585	nsp2 (807-2720)	A|T|protein_coding|synonymous_variant|LOW|1320A>T|Gly440Gly
1587	nsp2 (807-2720)	A|G|protein_coding|missense_variant|MODERATE|1322A>G|Glu441Gly
1589	nsp2 (807-2720)	G|A|protein_coding|missense_variant|MODERATE|1324G>A|Gly442Ser
1590	nsp2 (807-2720)	G|T|protein_coding|missense_variant|MODERATE|1325G>T|Gly442Val
1590	nsp2 (807-2720)	G|A|protein_coding|missense_variant|MODERATE|1325G>A|Gly442Asp
1591	nsp2 (807-2720)	T|C|protein_coding|synonymous_variant|LOW|1326T>C|Gly442Gly
1592	nsp2 (807-2720)	T|A|protein_coding|missense_variant|MODERATE|1327T>A|Ser443Thr
1592	nsp2 (807-2720)	T|C|protein_coding|missense_variant|MODERATE|1327T>C|Ser443Pro
1593	nsp2 (807-2720)	C|T|protein_coding|missense_variant|MODERATE|1328C>T|Ser443Phe
1594	nsp2 (807-2720)	C|T|protein_coding|synonymous_variant|LOW|1329C>T|Ser443Ser
1595	nsp2 (807-2720)	G|A|protein_coding|missense_variant|MODERATE|1330G>A|Glu444Lys
1598	nsp2 (807-2720)	G|A|protein_coding|missense_variant|MODERATE|1333G>A|Gly445Ser
1598	nsp2 (807-2720)	G|T|protein_coding|missense_variant|MODERATE|1333G>T|Gly445Cys
1598	nsp2 (807-2720)	G|C|protein_coding|missense_variant|MODERATE|1333G>C|Gly445Arg
1599	nsp2 (807-2720)	G|T|protein_coding|missense_variant|MODERATE|1334G>T|Gly445Val
1601	nsp2 (807-2720)	C|A|protein_coding|missense_variant|MODERATE|1336C>A|Leu446Ile
1601	nsp2 (807-2720)	C|T|protein_coding|missense_variant|MODERATE|1336C>T|Leu446Phe
1602	nsp2 (807-2720)	T|A|protein_coding|missense_variant|MODERATE|1337T>A|Leu446His
1605	nsp2 (807-2720)	A|C|protein_coding|missense_variant|MODERATE|1340A>C|Asn447Thr
1606	nsp2 (807-2720)	T|C|protein_coding|synonymous_variant|LOW|1341T>C|Asn447Asn
1607	nsp2 (807-2720)	G|A|protein_coding|missense_variant|MODERATE|1342G>A|Asp448Asn
1609	nsp2 (807-2720)	C|T|protein_coding|synonymous_variant|LOW|1344C>T|Asp448Asp
1610	nsp2 (807-2720)	A|G|protein_coding|missense_variant|MODERATE|1345A>G|Asn449Asp
1612	nsp2 (807-2720)	C|T|protein_coding|synonymous_variant|LOW|1347C>T|Asn449Asn
1613	nsp2 (807-2720)	C|T|protein_coding|missense_variant|MODERATE|1348C>T|Leu450Phe
1613	nsp2 (807-2720)	C|A|protein_coding|missense_variant|MODERATE|1348C>A|Leu450Ile
1616	nsp2 (807-2720)	C|T|protein_coding|missense_variant|MODERATE|1351C>T|Leu451Phe
1617	nsp2 (807-2720)	T|G|protein_coding|missense_variant|MODERATE|1352T>G|Leu451Arg
1620	nsp2 (807-2720)	A|G|protein_coding|missense_variant|MODERATE|1355A>G|Glu452Gly
1620	nsp2 (807-2720)	A|T|protein_coding|missense_variant|MODERATE|1355A>T|Glu452Val
1620	nsp2 (807-2720)	A|C|protein_coding|missense_variant|MODERATE|1355A>C|Glu452Ala
1622	nsp2 (807-2720)	A|G|protein_coding|missense_variant|MODERATE|1357A>G|Ile453Val
1623	nsp2 (807-2720)	T|C|protein_coding|missense_variant|MODERATE|1358T>C|Ile453Thr
1625	nsp2 (807-2720)	C|T|protein_coding|missense_variant|MODERATE|1360C>T|Leu454Phe
1627	nsp2 (807-2720)	C|T|protein_coding|synonymous_variant|LOW|1362C>T|Leu454Leu
1629	nsp2 (807-2720)	A|C|protein_coding|missense_variant|MODERATE|1364A>C|Gln455Pro
1630	nsp2 (807-2720)	A|C|protein_coding|missense_variant|MODERATE|1365A>C|Gln455His
1631	nsp2 (807-2720)	A|C|protein_coding|missense_variant|MODERATE|1366A>C|Lys456Gln
1632	nsp2 (807-2720)	A|T|protein_coding|missense_variant|MODERATE|1367A>T|Lys456Ile
1635	nsp2 (807-2720)	A|G|protein_coding|missense_variant|MODERATE|1370A>G|Glu457Gly
1635	nsp2 (807-2720)	A|C|protein_coding|missense_variant|MODERATE|1370A>C|Glu457Ala
1636	nsp2 (807-2720)	G|T|protein_coding|missense_variant|MODERATE|1371G>T|Glu457Asp
1637	nsp2 (807-2720)	A|T|protein_coding|stop_gained|HIGH|1372A>T|Lys458*
1639	nsp2 (807-2720)	A|T|protein_coding|missense_variant|MODERATE|1374A>T|Lys458Asn
1639	nsp2 (807-2720)	A|G|protein_coding|synonymous_variant|LOW|1374A>G|Lys458Lys
1642	nsp2 (807-2720)	C|T|protein_coding|synonymous_variant|LOW|1377C>T|Val459Val
1643	nsp2 (807-2720)	A|G|protein_coding|missense_variant|MODERATE|1378A>G|Asn460Asp
1646	nsp2 (807-2720)	A|G|protein_coding|missense_variant|MODERATE|1381A>G|Ile461Val
1648	nsp2 (807-2720)	C|T|protein_coding|synonymous_variant|LOW|1383C>T|Ile461Ile
1651	nsp2 (807-2720)	T|C|protein_coding|synonymous_variant|LOW|1386T>C|Asn462Asn
1652	nsp2 (807-2720)	A|G|protein_coding|missense_variant|MODERATE|1387A>G|Ile463Val
1653	nsp2 (807-2720)	T|C|protein_coding|missense_variant|MODERATE|1388T>C|Ile463Thr
1655	nsp2 (807-2720)	G|T|protein_coding|missense_variant|MODERATE|1390G>T|Val464Phe
1656	nsp2 (807-2720)	T|C|protein_coding|missense_variant|MODERATE|1391T>C|Val464Ala
1657	nsp2 (807-2720)	T|A|protein_coding|synonymous_variant|LOW|1392T>A|Val464Val
1658	nsp2 (807-2720)	G|T|protein_coding|missense_variant|MODERATE|1393G>T|Gly465Cys
1658	nsp2 (807-2720)	G|A|protein_coding|missense_variant|MODERATE|1393G>A|Gly465Ser
1659	nsp2 (807-2720)	G|T|protein_coding|missense_variant|MODERATE|1394G>T|Gly465Val
1661	nsp2 (807-2720)	G|T|protein_coding|missense_variant|MODERATE|1396G>T|Asp466Tyr
1662	nsp2 (807-2720)	A|G|protein_coding|missense_variant|MODERATE|1397A>G|Asp466Gly
1663	nsp2 (807-2720)	C|T|protein_coding|synonymous_variant|LOW|1398C>T|Asp466Asp
1666	nsp2 (807-2720)	T|C|protein_coding|synonymous_variant|LOW|1401T>C|Phe467Phe
1667	nsp2 (807-2720)	A|G|protein_coding|missense_variant|MODERATE|1402A>G|Lys468Glu
1667	nsp2 (807-2720)	A|C|protein_coding|missense_variant|MODERATE|1402A>C|Lys468Gln
1668	nsp2 (807-2720)	A|G|protein_coding|missense_variant|MODERATE|1403A>G|Lys468Arg
1669	nsp2 (807-2720)	A|G|protein_coding|synonymous_variant|LOW|1404A>G|Lys468Lys
1670	nsp2 (807-2720)	C|T|protein_coding|missense_variant|MODERATE|1405C>T|Leu469Phe
1670	nsp2 (807-2720)	C|A|protein_coding|missense_variant|MODERATE|1405C>A|Leu469Ile
1671	nsp2 (807-2720)	T|C|protein_coding|missense_variant|MODERATE|1406T>C|Leu469Pro
1674	nsp2 (807-2720)	A|G|protein_coding|missense_variant|MODERATE|1409A>G|Asn470Ser
1675	nsp2 (807-2720)	T|C|protein_coding|synonymous_variant|LOW|1410T>C|Asn470Asn
1677	nsp2 (807-2720)	A|T|protein_coding|missense_variant|MODERATE|1412A>T|Glu471Val
1677	nsp2 (807-2720)	A|C|protein_coding|missense_variant|MODERATE|1412A>C|Glu471Ala
1677	nsp2 (807-2720)	A|G|protein_coding|missense_variant|MODERATE|1412A>G|Glu471Gly
1678	nsp2 (807-2720)	A|G|protein_coding|synonymous_variant|LOW|1413A>G|Glu471Glu
1679	nsp2 (807-2720)	G|A|protein_coding|missense_variant|MODERATE|1414G>A|Glu472Lys
1681	nsp2 (807-2720)	G|A|protein_coding|synonymous_variant|LOW|1416G>A|Glu472Glu
1681	nsp2 (807-2720)	G|T|protein_coding|missense_variant|MODERATE|1416G>T|Glu472Asp
1683	nsp2 (807-2720)	T|C|protein_coding|missense_variant|MODERATE|1418T>C|Ile473Thr
1684	nsp2 (807-2720)	C|T|protein_coding|synonymous_variant|LOW|1419C>T|Ile473Ile
1685	nsp2 (807-2720)	G|A|protein_coding|missense_variant|MODERATE|1420G>A|Ala474Thr
1686	nsp2 (807-2720)	C|T|protein_coding|missense_variant|MODERATE|1421C>T|Ala474Val
1687	nsp2 (807-2720)	C|T|protein_coding|synonymous_variant|LOW|1422C>T|Ala474Ala
1691	nsp2 (807-2720)	A|G|protein_coding|missense_variant|MODERATE|1426A>G|Ile476Val
1692	nsp2 (807-2720)	T|C|protein_coding|missense_variant|MODERATE|1427T>C|Ile476Thr
1694	nsp2 (807-2720)	T|C|protein_coding|synonymous_variant|LOW|1429T>C|Leu477Leu
1696	nsp2 (807-2720)	G|A|protein_coding|synonymous_variant|LOW|1431G>A|Leu477Leu
1697	nsp2 (807-2720)	G|T|protein_coding|missense_variant|MODERATE|1432G>T|Ala478Ser
1697	nsp2 (807-2720)	G|A|protein_coding|missense_variant|MODERATE|1432G>A|Ala478Thr
1698	nsp2 (807-2720)	C|T|protein_coding|missense_variant|MODERATE|1433C>T|Ala478Val
1699	nsp2 (807-2720)	A|G|protein_coding|synonymous_variant|LOW|1434A>G|Ala478Ala
1701	nsp2 (807-2720)	C|T|protein_coding|missense_variant|MODERATE|1436C>T|Ser479Phe
1703	nsp2 (807-2720)	T|C|protein_coding|missense_variant|MODERATE|1438T>C|Phe480Leu
1703	nsp2 (807-2720)	T|G|protein_coding|missense_variant|MODERATE|1438T>G|Phe480Val
1704	nsp2 (807-2720)	T|G|protein_coding|missense_variant|MODERATE|1439T>G|Phe480Cys
1705	nsp2 (807-2720)	T|A|protein_coding|missense_variant|MODERATE|1440T>A|Phe480Leu
1707	nsp2 (807-2720)	C|A|protein_coding|missense_variant|MODERATE|1442C>A|Ser481Tyr
1707	nsp2 (807-2720)	C|T|protein_coding|missense_variant|MODERATE|1442C>T|Ser481Phe
1708	nsp2 (807-2720)	T|C|protein_coding|synonymous_variant|LOW|1443T>C|Ser481Ser
1709	nsp2 (807-2720)	G|A|protein_coding|missense_variant|MODERATE|1444G>A|Ala482Thr
1709	nsp2 (807-2720)	G|T|protein_coding|missense_variant|MODERATE|1444G>T|Ala482Ser
1710	nsp2 (807-2720)	C|T|protein_coding|missense_variant|MODERATE|1445C>T|Ala482Val
1711	nsp2 (807-2720)	T|A|protein_coding|synonymous_variant|LOW|1446T>A|Ala482Ala
1713	nsp2 (807-2720)	C|A|protein_coding|missense_variant|MODERATE|1448C>A|Ser483Tyr
1714	nsp2 (807-2720)	C|T|protein_coding|synonymous_variant|LOW|1449C>T|Ser483Ser
1716	nsp2 (807-2720)	C|T|protein_coding|missense_variant|MODERATE|1451C>T|Thr484Ile
1717	nsp2 (807-2720)	A|G|protein_coding|synonymous_variant|LOW|1452A>G|Thr484Thr
1719	nsp2 (807-2720)	G|A|protein_coding|missense_variant|MODERATE|1454G>A|Ser485Asn
1719	nsp2 (807-2720)	G|T|protein_coding|missense_variant|MODERATE|1454G>T|Ser485Ile
1721	nsp2 (807-2720)	G|T|protein_coding|missense_variant|MODERATE|1456G>T|Ala486Ser
1722	nsp2 (807-2720)	C|T|protein_coding|missense_variant|MODERATE|1457C>T|Ala486Val
1723	nsp2 (807-2720)	T|A|protein_coding|synonymous_variant|LOW|1458T>A|Ala486Ala
1723	nsp2 (807-2720)	T|C|protein_coding|synonymous_variant|LOW|1458T>C|Ala486Ala
1724	nsp2 (807-2720)	T|G|protein_coding|missense_variant|MODERATE|1459T>G|Phe487Val
1727	nsp2 (807-2720)	G|A|protein_coding|missense_variant|MODERATE|1462G>A|Val488Met
1727	nsp2 (807-2720)	G|T|protein_coding|missense_variant|MODERATE|1462G>T|Val488Leu
1729	nsp2 (807-2720)	G|A|protein_coding|synonymous_variant|LOW|1464G>A|Val488Val
1729	nsp2 (807-2720)	G|T|protein_coding|synonymous_variant|LOW|1464G>T|Val488Val
1730	nsp2 (807-2720)	G|A|protein_coding|missense_variant|MODERATE|1465G>A|Glu489Lys
1731	nsp2 (807-2720)	A|C|protein_coding|missense_variant|MODERATE|1466A>C|Glu489Ala
1733	nsp2 (807-2720)	A|G|protein_coding|missense_variant|MODERATE|1468A>G|Thr490Ala
1734	nsp2 (807-2720)	C|T|protein_coding|missense_variant|MODERATE|1469C>T|Thr490Ile
1736	nsp2 (807-2720)	G|A|protein_coding|missense_variant|MODERATE|1471G>A|Val491Met
1738	nsp2 (807-2720)	G|T|protein_coding|synonymous_variant|LOW|1473G>T|Val491Val
1738	nsp2 (807-2720)	G|C|protein_coding|synonymous_variant|LOW|1473G>C|Val491Val
1740	nsp2 (807-2720)	A|G|protein_coding|missense_variant|MODERATE|1475A>G|Lys492Arg
1740	nsp2 (807-2720)	A|C|protein_coding|missense_variant|MODERATE|1475A>C|Lys492Thr
1741	nsp2 (807-2720)	A|G|protein_coding|synonymous_variant|LOW|1476A>G|Lys492Lys
1742	nsp2 (807-2720)	G|T|protein_coding|missense_variant|MODERATE|1477G>T|Gly493Cys
1742	nsp2 (807-2720)	G|A|protein_coding|missense_variant|MODERATE|1477G>A|Gly493Ser
1743	nsp2 (807-2720)	G|A|protein_coding|missense_variant|MODERATE|1478G>A|Gly493Asp
1744	nsp2 (807-2720)	T|C|protein_coding|synonymous_variant|LOW|1479T>C|Gly493Gly
1745	nsp2 (807-2720)	T|G|protein_coding|missense_variant|MODERATE|1480T>G|Leu494Val
1745	nsp2 (807-2720)	T|C|protein_coding|synonymous_variant|LOW|1480T>C|Leu494Leu
1747	nsp2 (807-2720)	G|A|protein_coding|synonymous_variant|LOW|1482G>A|Leu494Leu
1748	nsp2 (807-2720)	G|A|protein_coding|missense_variant|MODERATE|1483G>A|Asp495Asn
1750	nsp2 (807-2720)	T|C|protein_coding|synonymous_variant|LOW|1485T>C|Asp495Asp
1755	nsp2 (807-2720)	A|G|protein_coding|missense_variant|MODERATE|1490A>G|Lys497Arg
1756	nsp2 (807-2720)	A|G|protein_coding|synonymous_variant|LOW|1491A>G|Lys497Lys
1757	nsp2 (807-2720)	G|A|protein_coding|missense_variant|MODERATE|1492G>A|Ala498Thr
1758	nsp2 (807-2720)	C|T|protein_coding|missense_variant|MODERATE|1493C>T|Ala498Val
1759	nsp2 (807-2720)	A|G|protein_coding|synonymous_variant|LOW|1494A>G|Ala498Ala
1760	nsp2 (807-2720)	T|C|protein_coding|missense_variant|MODERATE|1495T>C|Phe499Leu
1761	nsp2 (807-2720)	T|C|protein_coding|missense_variant|MODERATE|1496T>C|Phe499Ser
1762	nsp2 (807-2720)	C|T|protein_coding|synonymous_variant|LOW|1497C>T|Phe499Phe
1766	nsp2 (807-2720)	C|A|protein_coding|missense_variant|MODERATE|1501C>A|Gln501Lys
1773	nsp2 (807-2720)	T|C|protein_coding|missense_variant|MODERATE|1508T>C|Val503Ala
1774	nsp2 (807-2720)	T|C|protein_coding|synonymous_variant|LOW|1509T>C|Val503Val
1775	nsp2 (807-2720)	G|A|protein_coding|missense_variant|MODERATE|1510G>A|Glu504Lys
1777	nsp2 (807-2720)	A|G|protein_coding|synonymous_variant|LOW|1512A>G|Glu504Glu
1778	nsp2 (807-2720)	T|C|protein_coding|missense_variant|MODERATE|1513T>C|Ser505Pro
1779	nsp2 (807-2720)	C|T|protein_coding|missense_variant|MODERATE|1514C>T|Ser505Phe
1779	nsp2 (807-2720)	C|G|protein_coding|missense_variant|MODERATE|1514C>G|Ser505Cys
1780	nsp2 (807-2720)	C|T|protein_coding|synonymous_variant|LOW|1515C>T|Ser505Ser
1782	nsp2 (807-2720)	G|A|protein_coding|missense_variant|MODERATE|1517G>A|Cys506Tyr
1782	nsp2 (807-2720)	G|T|protein_coding|missense_variant|MODERATE|1517G>T|Cys506Phe
1784	nsp2 (807-2720)	G|A|protein_coding|missense_variant|MODERATE|1519G>A|Gly507Ser
1789	nsp2 (807-2720)	T|A|protein_coding|missense_variant|MODERATE|1524T>A|Asn508Lys
1793	nsp2 (807-2720)	A|T|protein_coding|stop_gained|HIGH|1528A>T|Lys510*
1796	nsp2 (807-2720)	G|A|protein_coding|missense_variant|MODERATE|1531G>A|Val511Ile
1796	nsp2 (807-2720)	G|T|protein_coding|missense_variant|MODERATE|1531G>T|Val511Phe
1798	nsp2 (807-2720)	T|A|protein_coding|synonymous_variant|LOW|1533T>A|Val511Val
1800	nsp2 (807-2720)	C|T|protein_coding|missense_variant|MODERATE|1535C>T|Thr512Ile
1801	nsp2 (807-2720)	A|G|protein_coding|synonymous_variant|LOW|1536A>G|Thr512Thr
1802	nsp2 (807-2720)	A|G|protein_coding|missense_variant|MODERATE|1537A>G|Lys513Glu
1805	nsp2 (807-2720)	G|A|protein_coding|missense_variant|MODERATE|1540G>A|Gly514Arg
1806	nsp2 (807-2720)	G|A|protein_coding|missense_variant|MODERATE|1541G>A|Gly514Glu
1807	nsp2 (807-2720)	A|G|protein_coding|synonymous_variant|LOW|1542A>G|Gly514Gly
1808	nsp2 (807-2720)	A|G|protein_coding|missense_variant|MODERATE|1543A>G|Lys515Glu
1809	nsp2 (807-2720)	A|G|protein_coding|missense_variant|MODERATE|1544A>G|Lys515Arg
1809	nsp2 (807-2720)	A|C|protein_coding|missense_variant|MODERATE|1544A>C|Lys515Thr
1811	nsp2 (807-2720)	G|A|protein_coding|missense_variant|MODERATE|1546G>A|Ala516Thr
1811	nsp2 (807-2720)	G|T|protein_coding|missense_variant|MODERATE|1546G>T|Ala516Ser
1812	nsp2 (807-2720)	C|T|protein_coding|missense_variant|MODERATE|1547C>T|Ala516Val
1813	nsp2 (807-2720)	T|A|protein_coding|synonymous_variant|LOW|1548T>A|Ala516Ala
1813	nsp2 (807-2720)	T|C|protein_coding|synonymous_variant|LOW|1548T>C|Ala516Ala
1815	nsp2 (807-2720)	A|G|protein_coding|missense_variant|MODERATE|1550A>G|Lys517Arg
1817	nsp2 (807-2720)	A|G|protein_coding|missense_variant|MODERATE|1552A>G|Lys518Glu
1819	nsp2 (807-2720)	A|G|protein_coding|synonymous_variant|LOW|1554A>G|Lys518Lys
1819	nsp2 (807-2720)	A|C|protein_coding|missense_variant|MODERATE|1554A>C|Lys518Asn
1820	nsp2 (807-2720)	G|A|protein_coding|missense_variant|MODERATE|1555G>A|Gly519Ser
1820	nsp2 (807-2720)	G|T|protein_coding|missense_variant|MODERATE|1555G>T|Gly519Cys
1821	nsp2 (807-2720)	G|A|protein_coding|missense_variant|MODERATE|1556G>A|Gly519Asp
1821	nsp2 (807-2720)	G|T|protein_coding|missense_variant|MODERATE|1556G>T|Gly519Val
1822	nsp2 (807-2720)	T|C|protein_coding|synonymous_variant|LOW|1557T>C|Gly519Gly
1824	nsp2 (807-2720)	C|T|protein_coding|missense_variant|MODERATE|1559C>T|Ala520Val
1825	nsp2 (807-2720)	C|T|protein_coding|synonymous_variant|LOW|1560C>T|Ala520Ala
1829	nsp2 (807-2720)	A|G|protein_coding|missense_variant|MODERATE|1564A>G|Asn522Asp
1830	nsp2 (807-2720)	A|C|protein_coding|missense_variant|MODERATE|1565A>C|Asn522Thr
1831	nsp2 (807-2720)	T|C|protein_coding|synonymous_variant|LOW|1566T>C|Asn522Asn
1832	nsp2 (807-2720)	A|G|protein_coding|missense_variant|MODERATE|1567A>G|Ile523Val
1835	nsp2 (807-2720)	G|A|protein_coding|missense_variant|MODERATE|1570G>A|Gly524Ser
1835	nsp2 (807-2720)	G|T|protein_coding|missense_variant|MODERATE|1570G>T|Gly524Cys
1837	nsp2 (807-2720)	T|C|protein_coding|synonymous_variant|LOW|1572T>C|Gly524Gly
1839	nsp2 (807-2720)	A|G|protein_coding|missense_variant|MODERATE|1574A>G|Glu525Gly
1842	nsp2 (807-2720)	A|G|protein_coding|missense_variant|MODERATE|1577A>G|Gln526Arg
1843	nsp2 (807-2720)	G|T|protein_coding|missense_variant|MODERATE|1578G>T|Gln526His
1843	nsp2 (807-2720)	G|A|protein_coding|synonymous_variant|LOW|1578G>A|Gln526Gln
1846	nsp2 (807-2720)	A|G|protein_coding|synonymous_variant|LOW|1581A>G|Lys527Lys
1846	nsp2 (807-2720)	A|T|protein_coding|missense_variant|MODERATE|1581A>T|Lys527Asn
1846	nsp2 (807-2720)	A|C|protein_coding|missense_variant|MODERATE|1581A>C|Lys527Asn
1847	nsp2 (807-2720)	T|C|protein_coding|missense_variant|MODERATE|1582T>C|Ser528Pro
1848	nsp2 (807-2720)	C|T|protein_coding|missense_variant|MODERATE|1583C>T|Ser528Leu
1851	nsp2 (807-2720)	T|C|protein_coding|missense_variant|MODERATE|1586T>C|Ile529Thr
1852	nsp2 (807-2720)	A|G|protein_coding|missense_variant|MODERATE|1587A>G|Ile529Met
1853	nsp2 (807-2720)	C|T|protein_coding|synonymous_variant|LOW|1588C>T|Leu530Leu
1855	nsp2 (807-2720)	G|T|protein_coding|synonymous_variant|LOW|1590G>T|Leu530Leu
1856	nsp2 (807-2720)	A|G|protein_coding|missense_variant|MODERATE|1591A>G|Ser531Gly
1856	nsp2 (807-2720)	A|C|protein_coding|missense_variant|MODERATE|1591A>C|Ser531Arg
1857	nsp2 (807-2720)	G|A|protein_coding|missense_variant|MODERATE|1592G>A|Ser531Asn
1857	nsp2 (807-2720)	G|T|protein_coding|missense_variant|MODERATE|1592G>T|Ser531Ile
1858	nsp2 (807-2720)	T|G|protein_coding|missense_variant|MODERATE|1593T>G|Ser531Arg
1859	nsp2 (807-2720)	C|T|protein_coding|missense_variant|MODERATE|1594C>T|Pro532Ser
1860	nsp2 (807-2720)	C|T|protein_coding|missense_variant|MODERATE|1595C>T|Pro532Leu
1862	nsp2 (807-2720)	C|T|protein_coding|missense_variant|MODERATE|1597C>T|Leu533Phe
1863	nsp2 (807-2720)	T|A|protein_coding|missense_variant|MODERATE|1598T>A|Leu533His
1863	nsp2 (807-2720)	T|G|protein_coding|missense_variant|MODERATE|1598T>G|Leu533Arg
1864	nsp2 (807-2720)	T|G|protein_coding|synonymous_variant|LOW|1599T>G|Leu533Leu
1867	nsp2 (807-2720)	T|C|protein_coding|synonymous_variant|LOW|1602T>C|Tyr534Tyr
1868	nsp2 (807-2720)	G|A|protein_coding|missense_variant|MODERATE|1603G>A|Ala535Thr
1869	nsp2 (807-2720)	C|T|protein_coding|missense_variant|MODERATE|1604C>T|Ala535Val
1870	nsp2 (807-2720)	A|T|protein_coding|synonymous_variant|LOW|1605A>T|Ala535Ala
1871	nsp2 (807-2720)	T|G|protein_coding|missense_variant|MODERATE|1606T>G|Phe536Val
1872	nsp2 (807-2720)	T|G|protein_coding|missense_variant|MODERATE|1607T>G|Phe536Cys
1873	nsp2 (807-2720)	T|G|protein_coding|missense_variant|MODERATE|1608T>G|Phe536Leu
1873	nsp2 (807-2720)	T|C|protein_coding|synonymous_variant|LOW|1608T>C|Phe536Phe
1874	nsp2 (807-2720)	G|T|protein_coding|missense_variant|MODERATE|1609G>T|Ala537Ser
1874	nsp2 (807-2720)	G|A|protein_coding|missense_variant|MODERATE|1609G>A|Ala537Thr
1875	nsp2 (807-2720)	C|T|protein_coding|missense_variant|MODERATE|1610C>T|Ala537Val
1876	nsp2 (807-2720)	A|C|protein_coding|synonymous_variant|LOW|1611A>C|Ala537Ala
1877	nsp2 (807-2720)	T|C|protein_coding|missense_variant|MODERATE|1612T>C|Ser538Pro
1877	nsp2 (807-2720)	T|A|protein_coding|missense_variant|MODERATE|1612T>A|Ser538Thr
1878	nsp2 (807-2720)	C|T|protein_coding|missense_variant|MODERATE|1613C>T|Ser538Leu
1880	nsp2 (807-2720)	G|A|protein_coding|missense_variant|MODERATE|1615G>A|Glu539Lys
1882	nsp2 (807-2720)	G|T|protein_coding|missense_variant|MODERATE|1617G>T|Glu539Asp
1883	nsp2 (807-2720)	G|A|protein_coding|missense_variant|MODERATE|1618G>A|Ala540Thr
1884	nsp2 (807-2720)	C|T|protein_coding|missense_variant|MODERATE|1619C>T|Ala540Val
1885	nsp2 (807-2720)	T|C|protein_coding|synonymous_variant|LOW|1620T>C|Ala540Ala
1886	nsp2 (807-2720)	G|T|protein_coding|missense_variant|MODERATE|1621G>T|Ala541Ser
1887	nsp2 (807-2720)	C|T|protein_coding|missense_variant|MODERATE|1622C>T|Ala541Val
1888	nsp2 (807-2720)	T|C|protein_coding|synonymous_variant|LOW|1623T>C|Ala541Ala
1889	nsp2 (807-2720)	C|T|protein_coding|missense_variant|MODERATE|1624C>T|Arg542Cys
1890	nsp2 (807-2720)	G|A|protein_coding|missense_variant|MODERATE|1625G>A|Arg542His
1890	nsp2 (807-2720)	G|T|protein_coding|missense_variant|MODERATE|1625G>T|Arg542Leu
1891	nsp2 (807-2720)	T|G|protein_coding|synonymous_variant|LOW|1626T>G|Arg542Arg
1895	nsp2 (807-2720)	G|T|protein_coding|missense_variant|MODERATE|1630G>T|Val544Leu
1896	nsp2 (807-2720)	T|C|protein_coding|missense_variant|MODERATE|1631T>C|Val544Ala
1897	nsp2 (807-2720)	A|G|protein_coding|synonymous_variant|LOW|1632A>G|Val544Val
1900	nsp2 (807-2720)	A|G|protein_coding|synonymous_variant|LOW|1635A>G|Arg545Arg
1900	nsp2 (807-2720)	A|C|protein_coding|synonymous_variant|LOW|1635A>C|Arg545Arg
1902	nsp2 (807-2720)	C|T|protein_coding|missense_variant|MODERATE|1637C>T|Ser546Leu
1904	nsp2 (807-2720)	A|G|protein_coding|missense_variant|MODERATE|1639A>G|Ile547Val
1905	nsp2 (807-2720)	T|G|protein_coding|missense_variant|MODERATE|1640T>G|Ile547Ser
1905	nsp2 (807-2720)	T|C|protein_coding|missense_variant|MODERATE|1640T>C|Ile547Thr
1906	nsp2 (807-2720)	T|C|protein_coding|synonymous_variant|LOW|1641T>C|Ile547Ile
1906	nsp2 (807-2720)	T|A|protein_coding|synonymous_variant|LOW|1641T>A|Ile547Ile
1908	nsp2 (807-2720)	T|C|protein_coding|missense_variant|MODERATE|1643T>C|Phe548Ser
1909	nsp2 (807-2720)	C|T|protein_coding|synonymous_variant|LOW|1644C>T|Phe548Phe
1910	nsp2 (807-2720)	T|A|protein_coding|missense_variant|MODERATE|1645T>A|Ser549Thr
1910	nsp2 (807-2720)	T|G|protein_coding|missense_variant|MODERATE|1645T>G|Ser549Ala
1911	nsp2 (807-2720)	C|T|protein_coding|missense_variant|MODERATE|1646C>T|Ser549Phe
1912	nsp2 (807-2720)	C|T|protein_coding|synonymous_variant|LOW|1647C>T|Ser549Ser
1912	nsp2 (807-2720)	C|A|protein_coding|synonymous_variant|LOW|1647C>A|Ser549Ser
1913	nsp2 (807-2720)	C|T|protein_coding|missense_variant|MODERATE|1648C>T|Arg550Cys
1914	nsp2 (807-2720)	G|A|protein_coding|missense_variant|MODERATE|1649G>A|Arg550His
1915	nsp2 (807-2720)	C|T|protein_coding|synonymous_variant|LOW|1650C>T|Arg550Arg
1916	nsp2 (807-2720)	A|G|protein_coding|missense_variant|MODERATE|1651A>G|Thr551Ala
1917	nsp2 (807-2720)	C|T|protein_coding|missense_variant|MODERATE|1652C>T|Thr551Ile
1918	nsp2 (807-2720)	T|C|protein_coding|synonymous_variant|LOW|1653T>C|Thr551Thr
1920	nsp2 (807-2720)	T|A|protein_coding|missense_variant|MODERATE|1655T>A|Leu552His
1921	nsp2 (807-2720)	T|A|protein_coding|synonymous_variant|LOW|1656T>A|Leu552Leu
1924	nsp2 (807-2720)	A|G|protein_coding|synonymous_variant|LOW|1659A>G|Glu553Glu
1925	nsp2 (807-2720)	A|G|protein_coding|missense_variant|MODERATE|1660A>G|Thr554Ala
1925	nsp2 (807-2720)	A|C|protein_coding|missense_variant|MODERATE|1660A>C|Thr554Pro
1926	nsp2 (807-2720)	C|T|protein_coding|missense_variant|MODERATE|1661C>T|Thr554Ile
1926	nsp2 (807-2720)	C|A|protein_coding|missense_variant|MODERATE|1661C>A|Thr554Asn
1927	nsp2 (807-2720)	T|C|protein_coding|synonymous_variant|LOW|1662T>C|Thr554Thr
1927	nsp2 (807-2720)	T|A|protein_coding|synonymous_variant|LOW|1662T>A|Thr554Thr
1929	nsp2 (807-2720)	C|T|protein_coding|missense_variant|MODERATE|1664C>T|Ala555Val
1931	nsp2 (807-2720)	C|A|protein_coding|missense_variant|MODERATE|1666C>A|Gln556Lys
1934	nsp2 (807-2720)	A|G|protein_coding|missense_variant|MODERATE|1669A>G|Asn557Asp
1935	nsp2 (807-2720)	A|G|protein_coding|missense_variant|MODERATE|1670A>G|Asn557Ser
1936	nsp2 (807-2720)	T|C|protein_coding|synonymous_variant|LOW|1671T>C|Asn557Asn
1937	nsp2 (807-2720)	T|C|protein_coding|missense_variant|MODERATE|1672T>C|Ser558Pro
1938	nsp2 (807-2720)	C|T|protein_coding|missense_variant|MODERATE|1673C>T|Ser558Phe
1939	nsp2 (807-2720)	T|C|protein_coding|synonymous_variant|LOW|1674T>C|Ser558Ser
1939	nsp2 (807-2720)	T|G|protein_coding|synonymous_variant|LOW|1674T>G|Ser558Ser
1940	nsp2 (807-2720)	G|A|protein_coding|missense_variant|MODERATE|1675G>A|Val559Met
1941	nsp2 (807-2720)	T|G|protein_coding|missense_variant|MODERATE|1676T>G|Val559Gly
1941	nsp2 (807-2720)	T|C|protein_coding|missense_variant|MODERATE|1676T>C|Val559Ala
1942	nsp2 (807-2720)	G|T|protein_coding|synonymous_variant|LOW|1677G>T|Val559Val
1943	nsp2 (807-2720)	C|T|protein_coding|missense_variant|MODERATE|1678C>T|Arg560Cys
1944	nsp2 (807-2720)	G|A|protein_coding|missense_variant|MODERATE|1679G>A|Arg560His
1944	nsp2 (807-2720)	G|T|protein_coding|missense_variant|MODERATE|1679G>T|Arg560Leu
1945	nsp2 (807-2720)	T|C|protein_coding|synonymous_variant|LOW|1680T>C|Arg560Arg
1946	nsp2 (807-2720)	G|T|protein_coding|missense_variant|MODERATE|1681G>T|Val561Phe
1947	nsp2 (807-2720)	T|C|protein_coding|missense_variant|MODERATE|1682T>C|Val561Ala
1951	nsp2 (807-2720)	A|G|protein_coding|synonymous_variant|LOW|1686A>G|Leu562Leu
1953	nsp2 (807-2720)	A|G|protein_coding|missense_variant|MODERATE|1688A>G|Gln563Arg
1954	nsp2 (807-2720)	G|A|protein_coding|synonymous_variant|LOW|1689G>A|Gln563Gln
1954	nsp2 (807-2720)	G|T|protein_coding|missense_variant|MODERATE|1689G>T|Gln563His
1957	nsp2 (807-2720)	G|T|protein_coding|missense_variant|MODERATE|1692G>T|Lys564Asn
1957	nsp2 (807-2720)	G|A|protein_coding|synonymous_variant|LOW|1692G>A|Lys564Lys
1958	nsp2 (807-2720)	G|A|protein_coding|missense_variant|MODERATE|1693G>A|Ala565Thr
1959	nsp2 (807-2720)	C|T|protein_coding|missense_variant|MODERATE|1694C>T|Ala565Val
1960	nsp2 (807-2720)	C|T|protein_coding|synonymous_variant|LOW|1695C>T|Ala565Ala
1962	nsp2 (807-2720)	C|T|protein_coding|missense_variant|MODERATE|1697C>T|Ala566Val
1964	nsp2 (807-2720)	A|C|protein_coding|missense_variant|MODERATE|1699A>C|Ile567Leu
1965	nsp2 (807-2720)	T|C|protein_coding|missense_variant|MODERATE|1700T>C|Ile567Thr
1968	nsp2 (807-2720)	C|T|protein_coding|missense_variant|MODERATE|1703C>T|Thr568Ile
1972	nsp2 (807-2720)	A|G|protein_coding|missense_variant|MODERATE|1707A>G|Ile569Met
1973	nsp2 (807-2720)	C|T|protein_coding|synonymous_variant|LOW|1708C>T|Leu570Leu
1976	nsp2 (807-2720)	G|T|protein_coding|missense_variant|MODERATE|1711G>T|Asp571Tyr
1976	nsp2 (807-2720)	G|A|protein_coding|missense_variant|MODERATE|1711G>A|Asp571Asn
1977	nsp2 (807-2720)	A|T|protein_coding|missense_variant|MODERATE|1712A>T|Asp571Val
1978	nsp2 (807-2720)	T|A|protein_coding|missense_variant|MODERATE|1713T>A|Asp571Glu
1978	nsp2 (807-2720)	T|C|protein_coding|synonymous_variant|LOW|1713T>C|Asp571Asp
1979	nsp2 (807-2720)	G|A|protein_coding|missense_variant|MODERATE|1714G>A|Gly572Arg
1980	nsp2 (807-2720)	G|A|protein_coding|missense_variant|MODERATE|1715G>A|Gly572Glu
1981	nsp2 (807-2720)	A|G|protein_coding|synonymous_variant|LOW|1716A>G|Gly572Gly
1982	nsp2 (807-2720)	A|G|protein_coding|missense_variant|MODERATE|1717A>G|Ile573Val
1983	nsp2 (807-2720)	T|C|protein_coding|missense_variant|MODERATE|1718T>C|Ile573Thr
1984	nsp2 (807-2720)	T|C|protein_coding|synonymous_variant|LOW|1719T>C|Ile573Ile
1987	nsp2 (807-2720)	A|G|protein_coding|synonymous_variant|LOW|1722A>G|Ser574Ser
1989	nsp2 (807-2720)	A|G|protein_coding|missense_variant|MODERATE|1724A>G|Gln575Arg
1992	nsp2 (807-2720)	A|G|protein_coding|missense_variant|MODERATE|1727A>G|Tyr576Cys
1993	nsp2 (807-2720)	T|C|protein_coding|synonymous_variant|LOW|1728T>C|Tyr576Tyr
1996	nsp2 (807-2720)	A|C|protein_coding|synonymous_variant|LOW|1731A>C|Ser577Ser
1997	nsp2 (807-2720)	C|T|protein_coding|synonymous_variant|LOW|1732C>T|Leu578Leu
1998	nsp2 (807-2720)	T|A|protein_coding|missense_variant|MODERATE|1733T>A|Leu578Gln
1999	nsp2 (807-2720)	G|T|protein_coding|synonymous_variant|LOW|1734G>T|Leu578Leu
2000	nsp2 (807-2720)	A|G|protein_coding|missense_variant|MODERATE|1735A>G|Arg579Gly
2000	nsp2 (807-2720)	A|C|protein_coding|synonymous_variant|LOW|1735A>C|Arg579Arg
2001	nsp2 (807-2720)	G|A|protein_coding|missense_variant|MODERATE|1736G>A|Arg579Lys
2001	nsp2 (807-2720)	G|T|protein_coding|missense_variant|MODERATE|1736G>T|Arg579Ile
2002	nsp2 (807-2720)	A|C|protein_coding|missense_variant|MODERATE|1737A>C|Arg579Ser
2003	nsp2 (807-2720)	C|T|protein_coding|missense_variant|MODERATE|1738C>T|Leu580Phe
2005	nsp2 (807-2720)	C|T|protein_coding|synonymous_variant|LOW|1740C>T|Leu580Leu
2006	nsp2 (807-2720)	A|C|protein_coding|missense_variant|MODERATE|1741A>C|Ile581Leu
2009	nsp2 (807-2720)	G|A|protein_coding|missense_variant|MODERATE|1744G>A|Asp582Asn
2010	nsp2 (807-2720)	A|C|protein_coding|missense_variant|MODERATE|1745A>C|Asp582Ala
2010	nsp2 (807-2720)	A|G|protein_coding|missense_variant|MODERATE|1745A>G|Asp582Gly
2013	nsp2 (807-2720)	C|T|protein_coding|missense_variant|MODERATE|1748C>T|Ala583Val
2015	nsp2 (807-2720)	A|G|protein_coding|missense_variant|MODERATE|1750A>G|Met584Val
2017	nsp2 (807-2720)	G|A|protein_coding|missense_variant|MODERATE|1752G>A|Met584Ile
2018	nsp2 (807-2720)	A|G|protein_coding|missense_variant|MODERATE|1753A>G|Met585Val
2022	nsp2 (807-2720)	T|G|protein_coding|missense_variant|MODERATE|1757T>G|Phe586Cys
2022	nsp2 (807-2720)	T|C|protein_coding|missense_variant|MODERATE|1757T>C|Phe586Ser
2023	nsp2 (807-2720)	C|T|protein_coding|synonymous_variant|LOW|1758C>T|Phe586Phe
2026	nsp2 (807-2720)	A|G|protein_coding|synonymous_variant|LOW|1761A>G|Thr587Thr
2028	nsp2 (807-2720)	C|T|protein_coding|missense_variant|MODERATE|1763C>T|Ser588Phe
2029	nsp2 (807-2720)	T|C|protein_coding|synonymous_variant|LOW|1764T>C|Ser588Ser
2031	nsp2 (807-2720)	A|T|protein_coding|missense_variant|MODERATE|1766A>T|Asp589Val
2031	nsp2 (807-2720)	A|C|protein_coding|missense_variant|MODERATE|1766A>C|Asp589Ala
2032	nsp2 (807-2720)	T|G|protein_coding|missense_variant|MODERATE|1767T>G|Asp589Glu
2035	nsp2 (807-2720)	G|T|protein_coding|missense_variant|MODERATE|1770G>T|Leu590Phe
2035	nsp2 (807-2720)	G|A|protein_coding|synonymous_variant|LOW|1770G>A|Leu590Leu
2036	nsp2 (807-2720)	G|T|protein_coding|missense_variant|MODERATE|1771G>T|Ala591Ser
2036	nsp2 (807-2720)	G|A|protein_coding|missense_variant|MODERATE|1771G>A|Ala591Thr
2037	nsp2 (807-2720)	C|T|protein_coding|missense_variant|MODERATE|1772C>T|Ala591Val
2040	nsp2 (807-2720)	C|T|protein_coding|missense_variant|MODERATE|1775C>T|Thr592Ile
2041	nsp2 (807-2720)	T|C|protein_coding|synonymous_variant|LOW|1776T>C|Thr592Thr
2043	nsp2 (807-2720)	A|G|protein_coding|missense_variant|MODERATE|1778A>G|Asn593Ser
2044	nsp2 (807-2720)	C|G|protein_coding|missense_variant|MODERATE|1779C>G|Asn593Lys
2044	nsp2 (807-2720)	C|T|protein_coding|synonymous_variant|LOW|1779C>T|Asn593Asn
2045	nsp2 (807-2720)	A|T|protein_coding|missense_variant|MODERATE|1780A>T|Asn594Tyr
2047	nsp2 (807-2720)	T|C|protein_coding|synonymous_variant|LOW|1782T>C|Asn594Asn
2048	nsp2 (807-2720)	C|T|protein_coding|synonymous_variant|LOW|1783C>T|Leu595Leu
2051	nsp2 (807-2720)	G|A|protein_coding|missense_variant|MODERATE|1786G>A|Val596Ile
2051	nsp2 (807-2720)	G|T|protein_coding|missense_variant|MODERATE|1786G>T|Val596Phe
2054	nsp2 (807-2720)	G|A|protein_coding|missense_variant|MODERATE|1789G>A|Val597Ile
2056	nsp2 (807-2720)	A|G|protein_coding|synonymous_variant|LOW|1791A>G|Val597Val
2057	nsp2 (807-2720)	A|G|protein_coding|missense_variant|MODERATE|1792A>G|Met598Val
2058	nsp2 (807-2720)	T|C|protein_coding|missense_variant|MODERATE|1793T>C|Met598Thr
2059	nsp2 (807-2720)	G|T|protein_coding|missense_variant|MODERATE|1794G>T|Met598Ile
2059	nsp2 (807-2720)	G|A|protein_coding|missense_variant|MODERATE|1794G>A|Met598Ile
2061	nsp2 (807-2720)	C|T|protein_coding|missense_variant|MODERATE|1796C>T|Ala599Val
2061	nsp2 (807-2720)	C|A|protein_coding|missense_variant|MODERATE|1796C>A|Ala599Asp
2062	nsp2 (807-2720)	C|T|protein_coding|synonymous_variant|LOW|1797C>T|Ala599Ala
2063	nsp2 (807-2720)	T|A|protein_coding|missense_variant|MODERATE|1798T>A|Tyr600Asn
2063	nsp2 (807-2720)	T|C|protein_coding|missense_variant|MODERATE|1798T>C|Tyr600His
2065	nsp2 (807-2720)	C|T|protein_coding|synonymous_variant|LOW|1800C>T|Tyr600Tyr
2066	nsp2 (807-2720)	A|G|protein_coding|missense_variant|MODERATE|1801A>G|Ile601Val
2068	nsp2 (807-2720)	T|C|protein_coding|synonymous_variant|LOW|1803T>C|Ile601Ile
2069	nsp2 (807-2720)	A|G|protein_coding|missense_variant|MODERATE|1804A>G|Thr602Ala
2069	nsp2 (807-2720)	A|C|protein_coding|missense_variant|MODERATE|1804A>C|Thr602Pro
2075	nsp2 (807-2720)	G|A|protein_coding|missense_variant|MODERATE|1810G>A|Gly604Ser
2076	nsp2 (807-2720)	G|A|protein_coding|missense_variant|MODERATE|1811G>A|Gly604Asp
2077	nsp2 (807-2720)	T|C|protein_coding|synonymous_variant|LOW|1812T>C|Gly604Gly
2078	nsp2 (807-2720)	G|A|protein_coding|missense_variant|MODERATE|1813G>A|Val605Ile
2081	nsp2 (807-2720)	G|T|protein_coding|missense_variant|MODERATE|1816G>T|Val606Phe
2081	nsp2 (807-2720)	G|A|protein_coding|missense_variant|MODERATE|1816G>A|Val606Ile
2083	nsp2 (807-2720)	T|G|protein_coding|synonymous_variant|LOW|1818T>G|Val606Val
2083	nsp2 (807-2720)	T|C|protein_coding|synonymous_variant|LOW|1818T>C|Val606Val
2084	nsp2 (807-2720)	C|T|protein_coding|stop_gained|HIGH|1819C>T|Gln607*
2086	nsp2 (807-2720)	G|T|protein_coding|missense_variant|MODERATE|1821G>T|Gln607His
2086	nsp2 (807-2720)	G|A|protein_coding|synonymous_variant|LOW|1821G>A|Gln607Gln
2087	nsp2 (807-2720)	T|C|protein_coding|synonymous_variant|LOW|1822T>C|Leu608Leu
2091	nsp2 (807-2720)	C|T|protein_coding|missense_variant|MODERATE|1826C>T|Thr609Ile
2092	nsp2 (807-2720)	T|C|protein_coding|synonymous_variant|LOW|1827T>C|Thr609Thr
2094	nsp2 (807-2720)	C|T|protein_coding|missense_variant|MODERATE|1829C>T|Ser610Leu
2095	nsp2 (807-2720)	G|T|protein_coding|synonymous_variant|LOW|1830G>T|Ser610Ser
2095	nsp2 (807-2720)	G|A|protein_coding|synonymous_variant|LOW|1830G>A|Ser610Ser
2100	nsp2 (807-2720)	G|T|protein_coding|missense_variant|MODERATE|1835G>T|Trp612Leu
2102	nsp2 (807-2720)	C|T|protein_coding|synonymous_variant|LOW|1837C>T|Leu613Leu
2104	nsp2 (807-2720)	A|G|protein_coding|synonymous_variant|LOW|1839A>G|Leu613Leu
2106	nsp2 (807-2720)	C|T|protein_coding|missense_variant|MODERATE|1841C>T|Thr614Ile
2108	nsp2 (807-2720)	A|G|protein_coding|missense_variant|MODERATE|1843A>G|Asn615Asp
2109	nsp2 (807-2720)	A|G|protein_coding|missense_variant|MODERATE|1844A>G|Asn615Ser
2110	nsp2 (807-2720)	C|T|protein_coding|synonymous_variant|LOW|1845C>T|Asn615Asn
2110	nsp2 (807-2720)	C|A|protein_coding|missense_variant|MODERATE|1845C>A|Asn615Lys
2111	nsp2 (807-2720)	A|T|protein_coding|missense_variant|MODERATE|1846A>T|Ile616Phe
2111	nsp2 (807-2720)	A|G|protein_coding|missense_variant|MODERATE|1846A>G|Ile616Val
2112	nsp2 (807-2720)	T|C|protein_coding|missense_variant|MODERATE|1847T>C|Ile616Thr
2113	nsp2 (807-2720)	C|T|protein_coding|synonymous_variant|LOW|1848C>T|Ile616Ile
2114	nsp2 (807-2720)	T|C|protein_coding|missense_variant|MODERATE|1849T>C|Phe617Leu
2116	nsp2 (807-2720)	T|G|protein_coding|missense_variant|MODERATE|1851T>G|Phe617Leu
2116	nsp2 (807-2720)	T|A|protein_coding|missense_variant|MODERATE|1851T>A|Phe617Leu
2116	nsp2 (807-2720)	T|C|protein_coding|synonymous_variant|LOW|1851T>C|Phe617Phe
2117	nsp2 (807-2720)	G|T|protein_coding|missense_variant|MODERATE|1852G>T|Gly618Cys
2117	nsp2 (807-2720)	G|A|protein_coding|missense_variant|MODERATE|1852G>A|Gly618Ser
2120	nsp2 (807-2720)	A|T|protein_coding|missense_variant|MODERATE|1855A>T|Thr619Ser
2124	nsp2 (807-2720)	T|C|protein_coding|missense_variant|MODERATE|1859T>C|Val620Ala
2125	nsp2 (807-2720)	T|C|protein_coding|synonymous_variant|LOW|1860T>C|Val620Val
2126	nsp2 (807-2720)	T|C|protein_coding|missense_variant|MODERATE|1861T>C|Tyr621His
2127	nsp2 (807-2720)	A|G|protein_coding|missense_variant|MODERATE|1862A>G|Tyr621Cys
2127	nsp2 (807-2720)	A|C|protein_coding|missense_variant|MODERATE|1862A>C|Tyr621Ser
2128	nsp2 (807-2720)	T|C|protein_coding|synonymous_variant|LOW|1863T>C|Tyr621Tyr
2128	nsp2 (807-2720)	T|A|protein_coding|stop_gained|HIGH|1863T>A|Tyr621*
2133	nsp2 (807-2720)	A|G|protein_coding|missense_variant|MODERATE|1868A>G|Lys623Arg
2135	nsp2 (807-2720)	C|A|protein_coding|missense_variant|MODERATE|1870C>A|Leu624Ile
2137	nsp2 (807-2720)	C|T|protein_coding|synonymous_variant|LOW|1872C>T|Leu624Leu
2137	nsp2 (807-2720)	C|A|protein_coding|synonymous_variant|LOW|1872C>A|Leu624Leu
2138	nsp2 (807-2720)	A|G|protein_coding|missense_variant|MODERATE|1873A>G|Lys625Glu
2139	nsp2 (807-2720)	A|C|protein_coding|missense_variant|MODERATE|1874A>C|Lys625Thr
2140	nsp2 (807-2720)	A|G|protein_coding|synonymous_variant|LOW|1875A>G|Lys625Lys
2141	nsp2 (807-2720)	C|T|protein_coding|missense_variant|MODERATE|1876C>T|Pro626Ser
2141	nsp2 (807-2720)	C|A|protein_coding|missense_variant|MODERATE|1876C>A|Pro626Thr
2142	nsp2 (807-2720)	C|T|protein_coding|missense_variant|MODERATE|1877C>T|Pro626Leu
2143	nsp2 (807-2720)	C|T|protein_coding|synonymous_variant|LOW|1878C>T|Pro626Pro
2143	nsp2 (807-2720)	C|A|protein_coding|synonymous_variant|LOW|1878C>A|Pro626Pro
2144	nsp2 (807-2720)	G|T|protein_coding|missense_variant|MODERATE|1879G>T|Val627Phe
2144	nsp2 (807-2720)	G|A|protein_coding|missense_variant|MODERATE|1879G>A|Val627Ile
2145	nsp2 (807-2720)	T|C|protein_coding|missense_variant|MODERATE|1880T>C|Val627Ala
2146	nsp2 (807-2720)	C|T|protein_coding|synonymous_variant|LOW|1881C>T|Val627Val
2147	nsp2 (807-2720)	C|T|protein_coding|missense_variant|MODERATE|1882C>T|Leu628Phe
2149	nsp2 (807-2720)	T|C|protein_coding|synonymous_variant|LOW|1884T>C|Leu628Leu
2149	nsp2 (807-2720)	T|A|protein_coding|synonymous_variant|LOW|1884T>A|Leu628Leu
2151	nsp2 (807-2720)	A|G|protein_coding|missense_variant|MODERATE|1886A>G|Asp629Gly
2151	nsp2 (807-2720)	A|T|protein_coding|missense_variant|MODERATE|1886A>T|Asp629Val
2152	nsp2 (807-2720)	T|C|protein_coding|synonymous_variant|LOW|1887T>C|Asp629Asp
2153	nsp2 (807-2720)	T|C|protein_coding|missense_variant|MODERATE|1888T>C|Trp630Arg
2153	nsp2 (807-2720)	T|A|protein_coding|missense_variant|MODERATE|1888T>A|Trp630Arg
2155	nsp2 (807-2720)	G|T|protein_coding|missense_variant|MODERATE|1890G>T|Trp630Cys
2156	nsp2 (807-2720)	C|T|protein_coding|missense_variant|MODERATE|1891C>T|Leu631Phe
2158	nsp2 (807-2720)	T|C|protein_coding|synonymous_variant|LOW|1893T>C|Leu631Leu
2160	nsp2 (807-2720)	A|G|protein_coding|missense_variant|MODERATE|1895A>G|Glu632Gly
2161	nsp2 (807-2720)	A|G|protein_coding|synonymous_variant|LOW|1896A>G|Glu632Glu
2161	nsp2 (807-2720)	A|C|protein_coding|missense_variant|MODERATE|1896A>C|Glu632Asp
2162	nsp2 (807-2720)	G|T|protein_coding|stop_gained|HIGH|1897G>T|Glu633*
2164	nsp2 (807-2720)	G|A|protein_coding|synonymous_variant|LOW|1899G>A|Glu633Glu
2164	nsp2 (807-2720)	G|T|protein_coding|missense_variant|MODERATE|1899G>T|Glu633Asp
2164	nsp2 (807-2720)	G|C|protein_coding|missense_variant|MODERATE|1899G>C|Glu633Asp
2165	nsp2 (807-2720)	A|G|protein_coding|missense_variant|MODERATE|1900A>G|Lys634Glu
2167	nsp2 (807-2720)	G|T|protein_coding|missense_variant|MODERATE|1902G>T|Lys634Asn
2169	nsp2 (807-2720)	T|C|protein_coding|missense_variant|MODERATE|1904T>C|Phe635Ser
2170	nsp2 (807-2720)	T|A|protein_coding|missense_variant|MODERATE|1905T>A|Phe635Leu
2173	nsp2 (807-2720)	G|A|protein_coding|synonymous_variant|LOW|1908G>A|Lys636Lys
2174	nsp2 (807-2720)	G|A|protein_coding|missense_variant|MODERATE|1909G>A|Glu637Lys
2176	nsp2 (807-2720)	A|C|protein_coding|missense_variant|MODERATE|1911A>C|Glu637Asp
2176	nsp2 (807-2720)	A|G|protein_coding|synonymous_variant|LOW|1911A>G|Glu637Glu
2180	nsp2 (807-2720)	G|A|protein_coding|missense_variant|MODERATE|1915G>A|Val639Ile
2182	nsp2 (807-2720)	A|G|protein_coding|synonymous_variant|LOW|1917A>G|Val639Val
2184	nsp2 (807-2720)	A|G|protein_coding|missense_variant|MODERATE|1919A>G|Glu640Gly
2185	nsp2 (807-2720)	G|A|protein_coding|synonymous_variant|LOW|1920G>A|Glu640Glu
2186	nsp2 (807-2720)	T|G|protein_coding|missense_variant|MODERATE|1921T>G|Phe641Val
2187	nsp2 (807-2720)	T|G|protein_coding|missense_variant|MODERATE|1922T>G|Phe641Cys
2189	nsp2 (807-2720)	C|T|protein_coding|missense_variant|MODERATE|1924C>T|Leu642Phe
2189	nsp2 (807-2720)	C|A|protein_coding|missense_variant|MODERATE|1924C>A|Leu642Ile
2190	nsp2 (807-2720)	T|A|protein_coding|missense_variant|MODERATE|1925T>A|Leu642His
2191	nsp2 (807-2720)	T|A|protein_coding|synonymous_variant|LOW|1926T>A|Leu642Leu
2193	nsp2 (807-2720)	G|A|protein_coding|missense_variant|MODERATE|1928G>A|Arg643Lys
2194	nsp2 (807-2720)	A|G|protein_coding|synonymous_variant|LOW|1929A>G|Arg643Arg
2196	nsp2 (807-2720)	A|C|protein_coding|missense_variant|MODERATE|1931A>C|Asp644Ala
2197	nsp2 (807-2720)	C|T|protein_coding|synonymous_variant|LOW|1932C>T|Asp644Asp
2198	nsp2 (807-2720)	G|A|protein_coding|missense_variant|MODERATE|1933G>A|Gly645Ser
2198	nsp2 (807-2720)	G|T|protein_coding|missense_variant|MODERATE|1933G>T|Gly645Cys
2200	nsp2 (807-2720)	T|C|protein_coding|synonymous_variant|LOW|1935T>C|Gly645Gly
2201	nsp2 (807-2720)	T|A|protein_coding|missense_variant|MODERATE|1936T>A|Trp646Arg
2202	nsp2 (807-2720)	G|T|protein_coding|missense_variant|MODERATE|1937G>T|Trp646Leu
2203	nsp2 (807-2720)	G|T|protein_coding|missense_variant|MODERATE|1938G>T|Trp646Cys
2205	nsp2 (807-2720)	A|G|protein_coding|missense_variant|MODERATE|1940A>G|Glu647Gly
2205	nsp2 (807-2720)	A|C|protein_coding|missense_variant|MODERATE|1940A>C|Glu647Ala
2206	nsp2 (807-2720)	A|C|protein_coding|missense_variant|MODERATE|1941A>C|Glu647Asp
2207	nsp2 (807-2720)	A|G|protein_coding|missense_variant|MODERATE|1942A>G|Ile648Val
2210	nsp2 (807-2720)	G|T|protein_coding|missense_variant|MODERATE|1945G>T|Val649Phe
2210	nsp2 (807-2720)	G|A|protein_coding|missense_variant|MODERATE|1945G>A|Val649Ile
2211	nsp2 (807-2720)	T|C|protein_coding|missense_variant|MODERATE|1946T>C|Val649Ala
2215	nsp2 (807-2720)	A|G|protein_coding|synonymous_variant|LOW|1950A>G|Lys650Lys
2215	nsp2 (807-2720)	A|C|protein_coding|missense_variant|MODERATE|1950A>C|Lys650Asn
2217	nsp2 (807-2720)	T|C|protein_coding|missense_variant|MODERATE|1952T>C|Phe651Ser
2218	nsp2 (807-2720)	T|C|protein_coding|synonymous_variant|LOW|1953T>C|Phe651Phe
2219	nsp2 (807-2720)	A|G|protein_coding|missense_variant|MODERATE|1954A>G|Ile652Val
2222	nsp2 (807-2720)	T|C|protein_coding|missense_variant|MODERATE|1957T>C|Ser653Pro
2226	nsp2 (807-2720)	C|A|protein_coding|missense_variant|MODERATE|1961C>A|Thr654Asn
2227	nsp2 (807-2720)	C|T|protein_coding|synonymous_variant|LOW|1962C>T|Thr654Thr
2228	nsp2 (807-2720)	T|G|protein_coding|missense_variant|MODERATE|1963T>G|Cys655Gly
2229	nsp2 (807-2720)	G|A|protein_coding|missense_variant|MODERATE|1964G>A|Cys655Tyr
2230	nsp2 (807-2720)	T|C|protein_coding|synonymous_variant|LOW|1965T>C|Cys655Cys
2231	nsp2 (807-2720)	G|T|protein_coding|missense_variant|MODERATE|1966G>T|Ala656Ser
2232	nsp2 (807-2720)	C|T|protein_coding|missense_variant|MODERATE|1967C>T|Ala656Val
2233	nsp2 (807-2720)	T|C|protein_coding|synonymous_variant|LOW|1968T>C|Ala656Ala
2235	nsp2 (807-2720)	G|A|protein_coding|missense_variant|MODERATE|1970G>A|Cys657Tyr
2236	nsp2 (807-2720)	T|A|protein_coding|stop_gained|HIGH|1971T>A|Cys657*
2236	nsp2 (807-2720)	T|C|protein_coding|synonymous_variant|LOW|1971T>C|Cys657Cys
2237	nsp2 (807-2720)	G|A|protein_coding|missense_variant|MODERATE|1972G>A|Glu658Lys
2237	nsp2 (807-2720)	G|T|protein_coding|stop_gained|HIGH|1972G>T|Glu658*
2238	nsp2 (807-2720)	A|C|protein_coding|missense_variant|MODERATE|1973A>C|Glu658Ala
2238	nsp2 (807-2720)	A|G|protein_coding|missense_variant|MODERATE|1973A>G|Glu658Gly
2239	nsp2 (807-2720)	A|G|protein_coding|synonymous_variant|LOW|1974A>G|Glu658Glu
2239	nsp2 (807-2720)	A|C|protein_coding|missense_variant|MODERATE|1974A>C|Glu658Asp
2240	nsp2 (807-2720)	A|G|protein_coding|missense_variant|MODERATE|1975A>G|Ile659Val
2240	nsp2 (807-2720)	A|T|protein_coding|missense_variant|MODERATE|1975A>T|Ile659Phe
2243	nsp2 (807-2720)	G|A|protein_coding|missense_variant|MODERATE|1978G>A|Val660Ile
2244	nsp2 (807-2720)	T|C|protein_coding|missense_variant|MODERATE|1979T>C|Val660Ala
2245	nsp2 (807-2720)	C|T|protein_coding|synonymous_variant|LOW|1980C>T|Val660Val
2246	nsp2 (807-2720)	G|A|protein_coding|missense_variant|MODERATE|1981G>A|Gly661Ser
2246	nsp2 (807-2720)	G|T|protein_coding|missense_variant|MODERATE|1981G>T|Gly661Cys
2249	nsp2 (807-2720)	G|A|protein_coding|missense_variant|MODERATE|1984G>A|Gly662Arg
2250	nsp2 (807-2720)	G|A|protein_coding|missense_variant|MODERATE|1985G>A|Gly662Glu
2250	nsp2 (807-2720)	G|C|protein_coding|missense_variant|MODERATE|1985G>C|Gly662Ala
2251	nsp2 (807-2720)	A|G|protein_coding|synonymous_variant|LOW|1986A>G|Gly662Gly
2252	nsp2 (807-2720)	C|A|protein_coding|missense_variant|MODERATE|1987C>A|Gln663Lys
2253	nsp2 (807-2720)	A|G|protein_coding|missense_variant|MODERATE|1988A>G|Gln663Arg
2254	nsp2 (807-2720)	A|G|protein_coding|synonymous_variant|LOW|1989A>G|Gln663Gln
2256	nsp2 (807-2720)	T|A|protein_coding|missense_variant|MODERATE|1991T>A|Ile664Asn
2258	nsp2 (807-2720)	G|A|protein_coding|missense_variant|MODERATE|1993G>A|Val665Ile
2260	nsp2 (807-2720)	C|T|protein_coding|synonymous_variant|LOW|1995C>T|Val665Val
2262	nsp2 (807-2720)	C|T|protein_coding|missense_variant|MODERATE|1997C>T|Thr666Ile
2263	nsp2 (807-2720)	C|T|protein_coding|synonymous_variant|LOW|1998C>T|Thr666Thr
2263	nsp2 (807-2720)	C|A|protein_coding|synonymous_variant|LOW|1998C>A|Thr666Thr
2264	nsp2 (807-2720)	T|C|protein_coding|missense_variant|MODERATE|1999T>C|Cys667Arg
2265	nsp2 (807-2720)	G|A|protein_coding|missense_variant|MODERATE|2000G>A|Cys667Tyr
2266	nsp2 (807-2720)	T|C|protein_coding|synonymous_variant|LOW|2001T>C|Cys667Cys
2269	nsp2 (807-2720)	A|T|protein_coding|synonymous_variant|LOW|2004A>T|Ala668Ala
2270	nsp2 (807-2720)	A|G|protein_coding|missense_variant|MODERATE|2005A>G|Lys669Glu
2272	nsp2 (807-2720)	G|A|protein_coding|synonymous_variant|LOW|2007G>A|Lys669Lys
2272	nsp2 (807-2720)	G|T|protein_coding|missense_variant|MODERATE|2007G>T|Lys669Asn
2273	nsp2 (807-2720)	G|A|protein_coding|missense_variant|MODERATE|2008G>A|Glu670Lys
2274	nsp2 (807-2720)	A|G|protein_coding|missense_variant|MODERATE|2009A>G|Glu670Gly
2274	nsp2 (807-2720)	A|C|protein_coding|missense_variant|MODERATE|2009A>C|Glu670Ala
2275	nsp2 (807-2720)	A|G|protein_coding|synonymous_variant|LOW|2010A>G|Glu670Glu
2276	nsp2 (807-2720)	A|G|protein_coding|missense_variant|MODERATE|2011A>G|Ile671Val
2277	nsp2 (807-2720)	T|C|protein_coding|missense_variant|MODERATE|2012T>C|Ile671Thr
2278	nsp2 (807-2720)	T|C|protein_coding|synonymous_variant|LOW|2013T>C|Ile671Ile
2280	nsp2 (807-2720)	A|G|protein_coding|missense_variant|MODERATE|2015A>G|Lys672Arg
2281	nsp2 (807-2720)	G|A|protein_coding|synonymous_variant|LOW|2016G>A|Lys672Lys
2281	nsp2 (807-2720)	G|T|protein_coding|missense_variant|MODERATE|2016G>T|Lys672Asn
2282	nsp2 (807-2720)	G|A|protein_coding|missense_variant|MODERATE|2017G>A|Glu673Lys
2283	nsp2 (807-2720)	A|C|protein_coding|missense_variant|MODERATE|2018A>C|Glu673Ala
2284	nsp2 (807-2720)	G|A|protein_coding|synonymous_variant|LOW|2019G>A|Glu673Glu
2285	nsp2 (807-2720)	A|G|protein_coding|missense_variant|MODERATE|2020A>G|Ser674Gly
2286	nsp2 (807-2720)	G|A|protein_coding|missense_variant|MODERATE|2021G>A|Ser674Asn
2287	nsp2 (807-2720)	T|C|protein_coding|synonymous_variant|LOW|2022T>C|Ser674Ser
2288	nsp2 (807-2720)	G|A|protein_coding|missense_variant|MODERATE|2023G>A|Val675Ile
2289	nsp2 (807-2720)	T|C|protein_coding|missense_variant|MODERATE|2024T>C|Val675Ala
2289	nsp2 (807-2720)	T|G|protein_coding|missense_variant|MODERATE|2024T>G|Val675Gly
2290	nsp2 (807-2720)	T|G|protein_coding|synonymous_variant|LOW|2025T>G|Val675Val
2290	nsp2 (807-2720)	T|C|protein_coding|synonymous_variant|LOW|2025T>C|Val675Val
2291	nsp2 (807-2720)	C|T|protein_coding|stop_gained|HIGH|2026C>T|Gln676*
2292	nsp2 (807-2720)	A|C|protein_coding|missense_variant|MODERATE|2027A>C|Gln676Pro
2292	nsp2 (807-2720)	A|G|protein_coding|missense_variant|MODERATE|2027A>G|Gln676Arg
2293	nsp2 (807-2720)	G|T|protein_coding|missense_variant|MODERATE|2028G>T|Gln676His
2295	nsp2 (807-2720)	C|T|protein_coding|missense_variant|MODERATE|2030C>T|Thr677Ile
2298	nsp2 (807-2720)	T|C|protein_coding|missense_variant|MODERATE|2033T>C|Phe678Ser
2299	nsp2 (807-2720)	C|T|protein_coding|synonymous_variant|LOW|2034C>T|Phe678Phe
2303	nsp2 (807-2720)	A|G|protein_coding|missense_variant|MODERATE|2038A>G|Lys680Glu
2304	nsp2 (807-2720)	A|G|protein_coding|missense_variant|MODERATE|2039A>G|Lys680Arg
2305	nsp2 (807-2720)	G|T|protein_coding|missense_variant|MODERATE|2040G>T|Lys680Asn
2306	nsp2 (807-2720)	C|T|protein_coding|missense_variant|MODERATE|2041C>T|Leu681Phe
2308	nsp2 (807-2720)	T|C|protein_coding|synonymous_variant|LOW|2043T>C|Leu681Leu
2309	nsp2 (807-2720)	G|A|protein_coding|missense_variant|MODERATE|2044G>A|Val682Ile
2309	nsp2 (807-2720)	G|T|protein_coding|missense_variant|MODERATE|2044G>T|Val682Leu
2310	nsp2 (807-2720)	T|C|protein_coding|missense_variant|MODERATE|2045T>C|Val682Ala
2310	nsp2 (807-2720)	T|G|protein_coding|missense_variant|MODERATE|2045T>G|Val682Gly
2311	nsp2 (807-2720)	A|G|protein_coding|synonymous_variant|LOW|2046A>G|Val682Val
2314	nsp2 (807-2720)	T|C|protein_coding|synonymous_variant|LOW|2049T>C|Asn683Asn
2317	nsp2 (807-2720)	A|G|protein_coding|synonymous_variant|LOW|2052A>G|Lys684Lys
2321	nsp2 (807-2720)	T|C|protein_coding|synonymous_variant|LOW|2056T>C|Leu686Leu
2322	nsp2 (807-2720)	T|C|protein_coding|missense_variant|MODERATE|2057T>C|Leu686Ser
2323	nsp2 (807-2720)	G|C|protein_coding|missense_variant|MODERATE|2058G>C|Leu686Phe
2323	nsp2 (807-2720)	G|T|protein_coding|missense_variant|MODERATE|2058G>T|Leu686Phe
2324	nsp2 (807-2720)	G|A|protein_coding|missense_variant|MODERATE|2059G>A|Ala687Thr
2325	nsp2 (807-2720)	C|T|protein_coding|missense_variant|MODERATE|2060C>T|Ala687Val
2326	nsp2 (807-2720)	T|A|protein_coding|synonymous_variant|LOW|2061T>A|Ala687Ala
2329	nsp2 (807-2720)	G|A|protein_coding|synonymous_variant|LOW|2064G>A|Leu688Leu
2330	nsp2 (807-2720)	T|G|protein_coding|missense_variant|MODERATE|2065T>G|Cys689Gly
2330	nsp2 (807-2720)	T|A|protein_coding|missense_variant|MODERATE|2065T>A|Cys689Ser
2334	nsp2 (807-2720)	C|T|protein_coding|missense_variant|MODERATE|2069C>T|Ala690Val
2335	nsp2 (807-2720)	T|C|protein_coding|synonymous_variant|LOW|2070T>C|Ala690Ala
2339	nsp2 (807-2720)	T|A|protein_coding|missense_variant|MODERATE|2074T>A|Ser692Thr
2340	nsp2 (807-2720)	C|T|protein_coding|missense_variant|MODERATE|2075C>T|Ser692Phe
2341	nsp2 (807-2720)	T|C|protein_coding|synonymous_variant|LOW|2076T>C|Ser692Ser
2342	nsp2 (807-2720)	A|G|protein_coding|missense_variant|MODERATE|2077A>G|Ile693Val
2343	nsp2 (807-2720)	T|C|protein_coding|missense_variant|MODERATE|2078T>C|Ile693Thr
2345	nsp2 (807-2720)	A|G|protein_coding|missense_variant|MODERATE|2080A>G|Ile694Val
2345	nsp2 (807-2720)	A|T|protein_coding|missense_variant|MODERATE|2080A>T|Ile694Phe
2348	nsp2 (807-2720)	A|G|protein_coding|missense_variant|MODERATE|2083A>G|Ile695Val
2350	nsp2 (807-2720)	T|A|protein_coding|synonymous_variant|LOW|2085T>A|Ile695Ile
2351	nsp2 (807-2720)	G|A|protein_coding|missense_variant|MODERATE|2086G>A|Gly696Ser
2354	nsp2 (807-2720)	G|A|protein_coding|missense_variant|MODERATE|2089G>A|Gly697Arg
2356	nsp2 (807-2720)	A|C|protein_coding|synonymous_variant|LOW|2091A>C|Gly697Gly
2357	nsp2 (807-2720)	G|A|protein_coding|missense_variant|MODERATE|2092G>A|Ala698Thr
2358	nsp2 (807-2720)	C|T|protein_coding|missense_variant|MODERATE|2093C>T|Ala698Val
2361	nsp2 (807-2720)	A|G|protein_coding|missense_variant|MODERATE|2096A>G|Lys699Arg
2363	nsp2 (807-2720)	C|T|protein_coding|missense_variant|MODERATE|2098C>T|Leu700Phe
2368	nsp2 (807-2720)	A|T|protein_coding|missense_variant|MODERATE|2103A>T|Lys701Asn
2369	nsp2 (807-2720)	G|A|protein_coding|missense_variant|MODERATE|2104G>A|Ala702Thr
2370	nsp2 (807-2720)	C|T|protein_coding|missense_variant|MODERATE|2105C>T|Ala702Val
2371	nsp2 (807-2720)	C|T|protein_coding|synonymous_variant|LOW|2106C>T|Ala702Ala
2372	nsp2 (807-2720)	T|G|protein_coding|missense_variant|MODERATE|2107T>G|Leu703Val
2376	nsp2 (807-2720)	A|G|protein_coding|missense_variant|MODERATE|2111A>G|Asn704Ser
2380	nsp2 (807-2720)	A|G|protein_coding|synonymous_variant|LOW|2115A>G|Leu705Leu
2381	nsp2 (807-2720)	G|T|protein_coding|missense_variant|MODERATE|2116G>T|Gly706Cys
2382	nsp2 (807-2720)	G|A|protein_coding|missense_variant|MODERATE|2117G>A|Gly706Asp
2383	nsp2 (807-2720)	T|G|protein_coding|synonymous_variant|LOW|2118T>G|Gly706Gly
2385	nsp2 (807-2720)	A|G|protein_coding|missense_variant|MODERATE|2120A>G|Glu707Gly
2388	nsp2 (807-2720)	C|T|protein_coding|missense_variant|MODERATE|2123C>T|Thr708Ile
2389	nsp2 (807-2720)	A|G|protein_coding|synonymous_variant|LOW|2124A>G|Thr708Thr
2390	nsp2 (807-2720)	T|C|protein_coding|missense_variant|MODERATE|2125T>C|Phe709Leu
2393	nsp2 (807-2720)	G|A|protein_coding|missense_variant|MODERATE|2128G>A|Val710Ile
2393	nsp2 (807-2720)	G|T|protein_coding|missense_variant|MODERATE|2128G>T|Val710Phe
2394	nsp2 (807-2720)	T|C|protein_coding|missense_variant|MODERATE|2129T>C|Val710Ala
2395	nsp2 (807-2720)	C|T|protein_coding|synonymous_variant|LOW|2130C>T|Val710Val
2395	nsp2 (807-2720)	C|A|protein_coding|synonymous_variant|LOW|2130C>A|Val710Val
2396	nsp2 (807-2720)	A|G|protein_coding|missense_variant|MODERATE|2131A>G|Thr711Ala
2396	nsp2 (807-2720)	A|C|protein_coding|missense_variant|MODERATE|2131A>C|Thr711Pro
2397	nsp2 (807-2720)	C|T|protein_coding|missense_variant|MODERATE|2132C>T|Thr711Met
2398	nsp2 (807-2720)	G|A|protein_coding|synonymous_variant|LOW|2133G>A|Thr711Thr
2398	nsp2 (807-2720)	G|T|protein_coding|synonymous_variant|LOW|2133G>T|Thr711Thr
2399	nsp2 (807-2720)	C|T|protein_coding|missense_variant|MODERATE|2134C>T|His712Tyr
2401	nsp2 (807-2720)	C|T|protein_coding|synonymous_variant|LOW|2136C>T|His712His
2401	nsp2 (807-2720)	C|A|protein_coding|missense_variant|MODERATE|2136C>A|His712Gln
2402	nsp2 (807-2720)	T|A|protein_coding|missense_variant|MODERATE|2137T>A|Ser713Thr
2404	nsp2 (807-2720)	A|T|protein_coding|synonymous_variant|LOW|2139A>T|Ser713Ser
2406	nsp2 (807-2720)	A|G|protein_coding|missense_variant|MODERATE|2141A>G|Lys714Arg
2407	nsp2 (807-2720)	G|A|protein_coding|synonymous_variant|LOW|2142G>A|Lys714Lys
2407	nsp2 (807-2720)	G|T|protein_coding|missense_variant|MODERATE|2142G>T|Lys714Asn
2410	nsp2 (807-2720)	A|G|protein_coding|synonymous_variant|LOW|2145A>G|Gly715Gly
2413	nsp2 (807-2720)	G|A|protein_coding|synonymous_variant|LOW|2148G>A|Leu716Leu
2416	nsp2 (807-2720)	C|T|protein_coding|synonymous_variant|LOW|2151C>T|Tyr717Tyr
2416	nsp2 (807-2720)	C|A|protein_coding|stop_gained|HIGH|2151C>A|Tyr717*
2418	nsp2 (807-2720)	G|A|protein_coding|missense_variant|MODERATE|2153G>A|Arg718Lys
2420	nsp2 (807-2720)	A|C|protein_coding|missense_variant|MODERATE|2155A>C|Lys719Gln
2422	nsp2 (807-2720)	G|A|protein_coding|synonymous_variant|LOW|2157G>A|Lys719Lys
2424	nsp2 (807-2720)	G|A|protein_coding|missense_variant|MODERATE|2159G>A|Cys720Tyr
2428	nsp2 (807-2720)	T|C|protein_coding|synonymous_variant|LOW|2163T>C|Val721Val
2430	nsp2 (807-2720)	A|C|protein_coding|missense_variant|MODERATE|2165A>C|Lys722Thr
2431	nsp2 (807-2720)	A|G|protein_coding|synonymous_variant|LOW|2166A>G|Lys722Lys
2432	nsp2 (807-2720)	T|C|protein_coding|missense_variant|MODERATE|2167T>C|Ser723Pro
2433	nsp2 (807-2720)	C|A|protein_coding|missense_variant|MODERATE|2168C>A|Ser723Tyr
2433	nsp2 (807-2720)	C|T|protein_coding|missense_variant|MODERATE|2168C>T|Ser723Phe
2434	nsp2 (807-2720)	C|T|protein_coding|synonymous_variant|LOW|2169C>T|Ser723Ser
2436	nsp2 (807-2720)	G|T|protein_coding|missense_variant|MODERATE|2171G>T|Arg724Ile
2437	nsp2 (807-2720)	A|C|protein_coding|missense_variant|MODERATE|2172A>C|Arg724Ser
2439	nsp2 (807-2720)	A|G|protein_coding|missense_variant|MODERATE|2174A>G|Glu725Gly
2440	nsp2 (807-2720)	A|G|protein_coding|synonymous_variant|LOW|2175A>G|Glu725Glu
2441	nsp2 (807-2720)	G|A|protein_coding|missense_variant|MODERATE|2176G>A|Glu726Lys
2443	nsp2 (807-2720)	A|G|protein_coding|synonymous_variant|LOW|2178A>G|Glu726Glu
2444	nsp2 (807-2720)	A|G|protein_coding|missense_variant|MODERATE|2179A>G|Thr727Ala
2445	nsp2 (807-2720)	C|T|protein_coding|missense_variant|MODERATE|2180C>T|Thr727Ile
2445	nsp2 (807-2720)	C|A|protein_coding|missense_variant|MODERATE|2180C>A|Thr727Asn
2446	nsp2 (807-2720)	T|A|protein_coding|synonymous_variant|LOW|2181T>A|Thr727Thr
2446	nsp2 (807-2720)	T|C|protein_coding|synonymous_variant|LOW|2181T>C|Thr727Thr
2447	nsp2 (807-2720)	G|A|protein_coding|missense_variant|MODERATE|2182G>A|Gly728Ser
2447	nsp2 (807-2720)	G|T|protein_coding|missense_variant|MODERATE|2182G>T|Gly728Cys
2448	nsp2 (807-2720)	G|A|protein_coding|missense_variant|MODERATE|2183G>A|Gly728Asp
2448	nsp2 (807-2720)	G|T|protein_coding|missense_variant|MODERATE|2183G>T|Gly728Val
2449	nsp2 (807-2720)	C|T|protein_coding|synonymous_variant|LOW|2184C>T|Gly728Gly
2450	nsp2 (807-2720)	C|T|protein_coding|synonymous_variant|LOW|2185C>T|Leu729Leu
2451	nsp2 (807-2720)	T|A|protein_coding|missense_variant|MODERATE|2186T>A|Leu729Gln
2453	nsp2 (807-2720)	C|T|protein_coding|missense_variant|MODERATE|2188C>T|Leu730Phe
2453	nsp2 (807-2720)	C|A|protein_coding|missense_variant|MODERATE|2188C>A|Leu730Ile
2454	nsp2 (807-2720)	T|C|protein_coding|missense_variant|MODERATE|2189T>C|Leu730Pro
2454	nsp2 (807-2720)	T|G|protein_coding|missense_variant|MODERATE|2189T>G|Leu730Arg
2455	nsp2 (807-2720)	C|T|protein_coding|synonymous_variant|LOW|2190C>T|Leu730Leu
2456	nsp2 (807-2720)	A|T|protein_coding|missense_variant|MODERATE|2191A>T|Met731Leu
2458	nsp2 (807-2720)	G|T|protein_coding|missense_variant|MODERATE|2193G>T|Met731Ile
2459	nsp2 (807-2720)	C|T|protein_coding|missense_variant|MODERATE|2194C>T|Pro732Ser
2460	nsp2 (807-2720)	C|A|protein_coding|missense_variant|MODERATE|2195C>A|Pro732His
2461	nsp2 (807-2720)	T|A|protein_coding|synonymous_variant|LOW|2196T>A|Pro732Pro
2461	nsp2 (807-2720)	T|C|protein_coding|synonymous_variant|LOW|2196T>C|Pro732Pro
2462	nsp2 (807-2720)	C|T|protein_coding|synonymous_variant|LOW|2197C>T|Leu733Leu
2462	nsp2 (807-2720)	C|A|protein_coding|missense_variant|MODERATE|2197C>A|Leu733Ile
2465	nsp2 (807-2720)	A|C|protein_coding|missense_variant|MODERATE|2200A>C|Lys734Gln
2466	nsp2 (807-2720)	A|G|protein_coding|missense_variant|MODERATE|2201A>G|Lys734Arg
2467	nsp2 (807-2720)	A|C|protein_coding|missense_variant|MODERATE|2202A>C|Lys734Asn
2468	nsp2 (807-2720)	G|A|protein_coding|missense_variant|MODERATE|2203G>A|Ala735Thr
2469	nsp2 (807-2720)	C|T|protein_coding|missense_variant|MODERATE|2204C>T|Ala735Val
2470	nsp2 (807-2720)	C|T|protein_coding|synonymous_variant|LOW|2205C>T|Ala735Ala
2471	nsp2 (807-2720)	C|T|protein_coding|missense_variant|MODERATE|2206C>T|Pro736Ser
2471	nsp2 (807-2720)	C|A|protein_coding|missense_variant|MODERATE|2206C>A|Pro736Thr
2475	nsp2 (807-2720)	A|G|protein_coding|missense_variant|MODERATE|2210A>G|Lys737Arg
2475	nsp2 (807-2720)	A|T|protein_coding|missense_variant|MODERATE|2210A>T|Lys737Ile
2476	nsp2 (807-2720)	A|G|protein_coding|synonymous_variant|LOW|2211A>G|Lys737Lys
2477	nsp2 (807-2720)	G|A|protein_coding|missense_variant|MODERATE|2212G>A|Glu738Lys
2480	nsp2 (807-2720)	A|G|protein_coding|missense_variant|MODERATE|2215A>G|Ile739Val
2482	nsp2 (807-2720)	T|C|protein_coding|synonymous_variant|LOW|2217T>C|Ile739Ile
2484	nsp2 (807-2720)	T|C|protein_coding|missense_variant|MODERATE|2219T>C|Ile740Thr
[truncated: 18,165 more rows]
